# Supplementary material for: Zinc–Brønsted acid mediated practical hydrotrifluoromethylation of alkenes with CF3Br
Source: Royal Society of Chemistry journal article supplement (doi:10.1039/d1qo01073e), 2021-01-01

**Zinc-Brønsted acid mediated practical hydrotrifluoromethylation of alkenes with CF<sub>3</sub>Br**

Deqian Peng,<sup>a</sup> Wu Fan,<sup>b</sup> Xueqi Zhao,<sup>a</sup> Wei Chen,<sup>c</sup> Yuan Wen,<sup>a</sup> Li Zhang<sup>a</sup> and Suhua Li<sup>\*a,d</sup>

<sup>a</sup> School of Chemistry, Sun Yat-Sen University, Guangzhou 510006, China

<sup>b</sup> Key Laboratory of Tobacco Flavor Basic Research, Zhengzhou Tobacco Research Institute of CNTC, Zhengzhou 450001, China

<sup>c</sup> Department of Colorectal Surgery & Guangdong Provincial Key laboratory of Colorectal and Pelvic Floor Disease & Guangdong Research Institute of Gastroenterology, The Sixth Affiliated Hospital of Sun Yat-Sen University, Guangzhou 510655, China.

<sup>d</sup> Key Lab of Functional Molecular Engineering of Guangdong Province, South China University of Technology, Guangzhou 510641, China.

\*lisuhua5@mail.sysu.edu.cn

| <b>Contents</b>                                                               | <b>Page</b> |
|-------------------------------------------------------------------------------|-------------|
| 1. General information                                                        | 3           |
| 2. Reaction Conditions Optimization                                           | 4           |
| 3. Hydroxytrifluoromethylation of Alkenes                                     | 8           |
| 4. Gram-scale Hydrotrifluoromethylation Reactions                             | 44          |
| 5. Hydrotrifluoromethylation of Alkenes with Vinyl Bromide or Benzyl Chloride | 45          |
| 6. Mechanism Studies                                                          | 46          |
| 7. References                                                                 | 52          |
| 8. NMR Spectra                                                                | 53          |

## 1. General Information

Acetonitrile was dried over  $\text{CaH}_2$ . All other reagents were used as received unless otherwise noted. Commercially available chemicals were purchased from Alfa Aesar, Sigma-Aldrich, Energy Chemical, and TCI. The  $\text{CF}_3\text{Br}$  was purchased from Shangfluoro Chemicals. Visualization was accomplished with UV light (254 nm) or  $\text{KMnO}_4$  stain. Flash column chromatography was performed using silica gel (300-400 mesh).  $^1\text{H}$  NMR Spectra were acquired on a Bruker Ascend<sup>TM</sup> 400 (at 400 MHz) and are reported relative to  $\text{SiMe}_4$  ( $\delta$  0.00) or the residue solvents from the deuterium solvents.  $^{13}\text{C}$  NMR spectra were acquired on a Bruker Ascend<sup>TM</sup> 400 (at 101 MHz) and are reported relative to  $\text{CDCl}_3$  ( $\delta$  77.16) or the residue solvents from the deuterium solvents.  $^{19}\text{F}$  NMR spectra were acquired on a Bruker Ascend<sup>TM</sup> 400 (at 376 MHz) and are reported relative to  $\text{CFCl}_3$  ( $\delta$  0.00). NMR acquisitions were performed at 295 K unless otherwise noted. Abbreviations are: s, singlet; d, doublet; t, triplet; q, quartet; p, pentet; bs, broad singlet; app., approximate peak. Melting points (m.p.) were determined using a WRS-2 microcomputer melting point meter and are uncorrected. All IR spectra were obtained as a film with Perkin Elmer FT-IR Spectrometer Frontier. Low-resolution mass spectrometry data was acquired by SHIMADZU GCMS-QP2010 SE. High-resolution mass spectrometry (HRMS) data was acquired by Synapt G2 Si or Thermo Scientific Q Exactive GC.

## 2. Reaction Conditions Optimization

**Table S1:** Screening of the metals

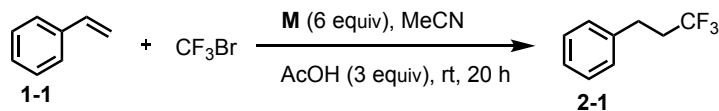

| entry    | Cat.      | yield of <b>2-1</b> (%) <sup>a</sup> | rsm (%) <sup>b</sup> |
|----------|-----------|--------------------------------------|----------------------|
| <b>1</b> | <b>Zn</b> | <b>61</b>                            | <b>33</b>            |
| 2        | In        | 10                                   | 72                   |
| 3        | Cu        | < 1                                  | 81                   |
| 4        | Mg        | < 1                                  | 75                   |
| 5        | Fe        | < 1                                  | 87                   |
| 6        | Ag        | < 1                                  | 87                   |
| 7        | Sb        | < 1                                  | 87                   |
| 8        | Al        | < 1                                  | 87                   |
| 9        | Mn        | 3                                    | 78                   |

The reaction was conducted in 25 mL Schlenk tube with styrene (29  $\mu$ L, 0.25 mmol), M (1.5 mmol), AcOH (43  $\mu$ L, 0.75 mmol), CF<sub>3</sub>Br (6.2 equiv) and MeCN (1 mL) at rt; <sup>a</sup> the yield was determined by <sup>19</sup>F NMR analysis of the crude reaction mixture with PhCF<sub>3</sub> as the internal standard; <sup>b</sup> rsm was determined by <sup>1</sup>H NMR analysis of the crude reaction mixture with mesitylene as the internal standard.

**Table S2:** Evaluation of the equivalents of Zn needed in the presence of 3 equiv of AcOH.

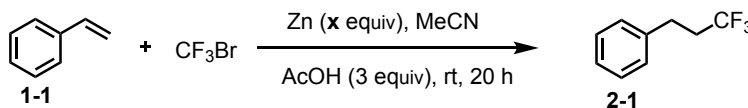

| entry | Zn (equiv) | yield of <b>2-1</b> (%) <sup>a</sup> | rsm (%) <sup>b</sup> |
|-------|------------|--------------------------------------|----------------------|
| 1     | 0          | 0                                    | 75                   |
| 2     | 1          | 18                                   | 69                   |
| 3     | 2          | 26                                   | 57                   |
| 4     | 3          | 27                                   | 54                   |
| 5     | 4          | 41                                   | 51                   |
| 6     | 5          | 55                                   | 36                   |
| 7     | <b>6</b>   | <b>61</b>                            | <b>33</b>            |
| 8     | 7          | 61                                   | 24                   |

The reaction was conducted in 25 mL Schlenk tube with styrene (29  $\mu$ L, 0.25 mmol), Zn, AcOH (43  $\mu$ L, 0.75 mmol), CF<sub>3</sub>Br (6.2 equiv) and MeCN (1 mL) at rt; <sup>a</sup> the yield was determined by <sup>19</sup>F NMR analysis of the crude reaction mixture with PhCF<sub>3</sub> as the internal standard; <sup>b</sup> rsm was determined by <sup>1</sup>H NMR analysis of the crude reaction mixture with mesitylene as the internal standard.



**Table S3: Evaluation of AcOH Needed in the Presence of 6 equiv of Zn.**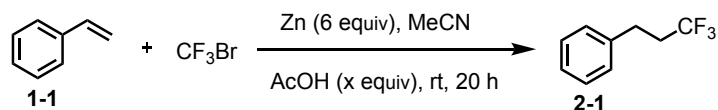

| entry    | x        | yield of <b>2-1</b> (%) <sup>a</sup> | rsm (%) <sup>b</sup> |
|----------|----------|--------------------------------------|----------------------|
| 1        | 0        | 0                                    | 84                   |
| 2        | 1        | 55                                   | 27                   |
| 3        | 2        | 60                                   | 33                   |
| <b>4</b> | <b>3</b> | <b>61</b>                            | <b>33</b>            |
| 5        | 4        | 60                                   | 36                   |
| 6        | 5        | 55                                   | 36                   |
| 7        | 6        | 51                                   | 39                   |

The reaction was conducted in 25 mL Schlenk tube with styrene (29  $\mu$ L, 0.25 mmol), Zn (1.5 mmol), AcOH, CF<sub>3</sub>Br (6.2 equiv) and MeCN (1 mL) at rt; <sup>a</sup> the yield was determined by <sup>19</sup>F NMR analysis of the crude reaction mixture with PhCF<sub>3</sub> as the internal standard; <sup>b</sup> rsm was determined by <sup>1</sup>H NMR analysis of the crude reaction mixture with mesitylene as the internal standard.

**Table S4: Screening of the solvents**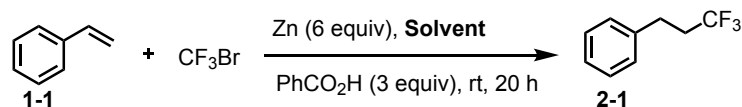

| entry | Solvents              | yield of <b>2-1</b> (%) <sup>a</sup> | rsm (%) <sup>b</sup> |
|-------|-----------------------|--------------------------------------|----------------------|
| 1     | NMP                   | 15                                   | 69                   |
| 2     | DMA                   | 30                                   | 51                   |
| 3     | DMF                   | 22                                   | 63                   |
| 4     | Dioxane               | 76                                   | 0                    |
| 5     | PhCN                  | 89                                   | 0                    |
| 6     | Xylene                | 23                                   | 60                   |
| 7     | Tol                   | 35                                   | 33                   |
| 8     | Glycol dimethyl ether | 84                                   | 0                    |
| 9     | CHCl <sub>3</sub>     | 4                                    | 58                   |
| 10    | PE                    | 19                                   | 3                    |
| 11    | Cyclooctane           | 17                                   | 45                   |
| 12    | DMSO                  | 2                                    | 84                   |
| 13    | MeCN                  | 86                                   | 0                    |

The reaction was conducted in 25 mL Schlenk tube with styrene (29  $\mu$ L, 0.25 mmol), Zn (1.5 mmol), PhCO<sub>2</sub>H (0.75 mmol), CF<sub>3</sub>Br (6.2 equiv) and solvent (1 mL) at rt; <sup>a</sup> the yield was determined by <sup>19</sup>F NMR analysis of the crude reaction mixture with PhCF<sub>3</sub> as the internal standard; <sup>b</sup> rsm was determined by <sup>1</sup>H NMR analysis of the crude reaction mixture with mesitylene as the internal standard.

**Table S5: Optimizing the quantity of Zn and PhCO<sub>2</sub>H (2:1)**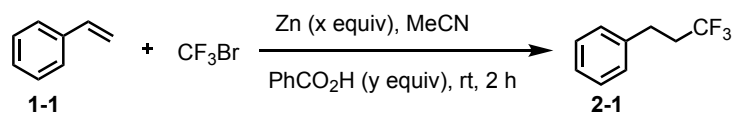

| entry | x   | y    | yield of <b>2-1</b> (%) <sup>a</sup> | rsm (%) <sup>b</sup> |
|-------|-----|------|--------------------------------------|----------------------|
| 1     | 5.0 | 2.5  | 88                                   | 0                    |
| 2     | 4.0 | 2.0  | 86                                   | 6                    |
| 3     | 3.0 | 1.5  | 74                                   | 15                   |
| 4     | 2.0 | 1.0  | 48                                   | 42                   |
| 5     | 1.0 | 0.5  | 26                                   | 66                   |
| 6     | 0.5 | 0.25 | 4                                    | 93                   |

The reaction was conducted in 25 mL Schlenk tube with styrene (29  $\mu$ L, 0.25 mmol), Zn, PhCO<sub>2</sub>H, CF<sub>3</sub>Br (6.2 equiv) and MeCN (1 mL) at rt; <sup>a</sup> the yield was determined by <sup>19</sup>F NMR analysis of the crude reaction mixture with PhCF<sub>3</sub> as the internal standard; <sup>b</sup> rsm was determined by <sup>1</sup>H NMR analysis of the crude reaction mixture with mesitylene as the internal standard.

**Table S6: Evaluation of the Equivalents of PhCO<sub>2</sub>H Needed in the Presence of 5 equiv of Zn.**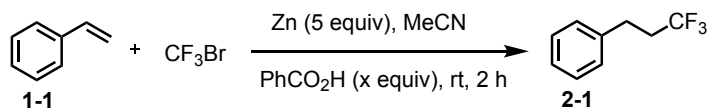

| entry | x   | yield of <b>2-1</b> (%) <sup>a</sup> | rsm (%) <sup>b</sup> |
|-------|-----|--------------------------------------|----------------------|
| 1     | 0.5 | 0                                    | 78                   |
| 2     | 1   | 2                                    | 87                   |
| 3     | 1.5 | 74                                   | 3                    |
| 4     | 2   | 81                                   | 6                    |
| 5     | 2.5 | 88                                   | 0                    |

The reaction was conducted in 25 mL Schlenk tube with styrene (29  $\mu$ L, 0.25 mmol), Zn (1.25 mmol), PhCO<sub>2</sub>H, CF<sub>3</sub>Br (6.2 equiv) and MeCN (1 mL) at rt; <sup>a</sup> the yield was determined by <sup>19</sup>F NMR analysis of the crude reaction mixture with PhCF<sub>3</sub> as the internal standard; <sup>b</sup> rsm was determined by <sup>1</sup>H NMR analysis of the crude reaction mixture with mesitylene as the internal standard.

**Table S7: Optimization of the Reaction Time**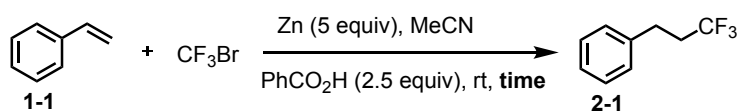

| entry | time (h) | yield of 2-1 (%) <sup>a</sup> | rsm (%) <sup>b</sup> |
|-------|----------|-------------------------------|----------------------|
| 1     | 0.25     | 11                            | 84                   |
| 2     | 0.5      | 79                            | 12                   |
| 3     | 1.0      | 87                            | 0                    |
| 4     | 2        | 88                            | 0                    |

The reaction was conducted in 25 mL Schlenk tube with styrene (29  $\mu\text{L}$ , 0.25 mmol), Zn (1.25 mmol),  $\text{PhCO}_2\text{H}$  (0.625 mmol),  $\text{CF}_3\text{Br}$  (6.2 equiv) and MeCN (1 mL) at rt; <sup>a</sup> the yield was determined by  $^{19}\text{F}$  NMR analysis of the crude reaction mixture with  $\text{PhCF}_3$  as the internal standard; <sup>b</sup> rsm was determined by  $^1\text{H}$  NMR analysis of the crude reaction mixture with mesitylene as the internal standard.

### Hydrotrifluoromethylation of Styrene with Saturated $\text{CF}_3\text{Br}$ Solution in $\text{CH}_3\text{CN}$

#### Calculating the concentration of saturated $\text{CF}_3\text{Br}$ in $\text{CH}_3\text{CN}$ :

Saturated  $\text{CF}_3\text{Br}$  solution in  $\text{CH}_3\text{CN}$  were prepared by stirring of  $\text{CH}_3\text{CN}$  (40 mL) under  $\text{CF}_3\text{Br}$  atmosphere in a 50 mL Schlenk flask with a  $\text{CF}_3\text{Br}$  balloon attached for 10 hours. The amount of  $\text{CF}_3\text{Br}$  dissolved in  $\text{CH}_3\text{CN}$  was calculated through weighing by difference with  $\text{CF}_3\text{Br}$  gas above the solvent deducted. The approximate concentration of  $\text{CF}_3\text{Br}$  was calculated as around 0.12 M (in  $\text{CH}_3\text{CN}$ ).

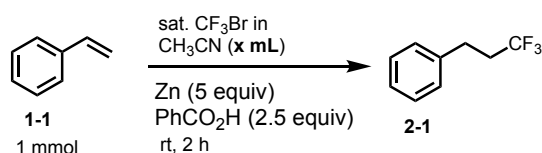

| entry | x  | yield of 2-1 (%) <sup>a</sup> | rsm (%) <sup>b</sup> |
|-------|----|-------------------------------|----------------------|
| 1     | 10 | 25                            | 69                   |
| 2     | 26 | 54                            | 36                   |

The reaction was conducted in 50 mL Schlenk flask with styrene (1.0 mmol), Zn (5.0 mmol),  $\text{PhCO}_2\text{H}$  (2.5 mmol), sat.  $\text{CF}_3\text{Br}$  in MeCN (10 mL or 26 mL as indicated) at rt; <sup>a</sup> the yield was determined by  $^{19}\text{F}$  NMR analysis of the crude reaction mixture with  $\text{PhCF}_3$  as the internal standard; <sup>b</sup> rsm was determined by  $^1\text{H}$  NMR analysis of the crude reaction mixture with mesitylene as the internal standard.

### 3. Hydroxytrifluoromethylation of Alkenes

*General procedure for the hydrotrifluoromethylation of alkenes:*

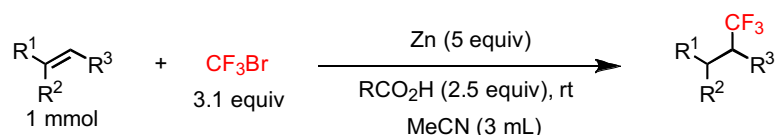

To a 50 mL of Schlenk flask was added Zn powder (5.0 mmol, 5 equiv) and RCO<sub>2</sub>H (2.5 mmol, 2.5 equiv), and it was sealed and evacuated for 30 s and backfilled with CF<sub>3</sub>Br (3.1 equiv). Then the flask was added MeCN (3 mL) and alkene (1.0 mmol, 1 equiv). After stirring for corresponding time at rt, the reaction mixture was filtered through a pad of Celite. The filtrate was concentrated, and the residue was purified by silica gel chromatography.

#### (3,3,3-trifluoropropyl)benzene (2-1, p4-31)

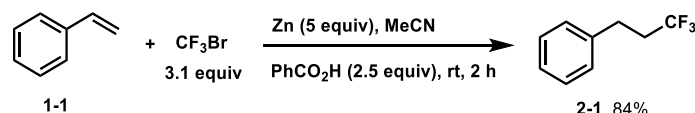

Prepared according to the general procedure using alkene **1-1** (115  $\mu\text{L}$ ,  $d = 0.906 \text{ g/mL}$ , 1.0 mmol), CF<sub>3</sub>Br (3.1 mmol), Zn (327.5 mg, 5.0 mmol), PhCO<sub>2</sub>H (305.3 mg, 2.5 mmol) and MeCN (3 mL). After stirring for 2 h at rt, the reaction mixture was added sat. Na<sub>2</sub>CO<sub>3</sub> aq. (3 mL) and stirred for 15 min, then directly purified by silica gel chromatography (pentane) to afford **2-1**<sup>1</sup> (146.0 mg, 84% yield) as a colorless oil.

**TLC:**  $R_f = 0.79$  in petroleum ether.

**<sup>1</sup>H NMR** (400 MHz, CDCl<sub>3</sub>)  $\delta$  7.34–7.30 (m, 2H), 7.24–7.19 (m, 3H), 2.90–2.85 (m, 2H), 2.45–2.33 (m, 2H).

**<sup>13</sup>C NMR** (101 MHz, CDCl<sub>3</sub>)  $\delta$  139.16, 128.87, 128.36, 126.87 (q,  $J = 276.7 \text{ Hz}$ ), 126.79, 35.80 (q,  $J = 28.4 \text{ Hz}$ ), 28.35 (q,  $J = 3.3 \text{ Hz}$ ).

**<sup>19</sup>F NMR** (376 MHz, CDCl<sub>3</sub>):  $\delta$  -67.21.

**MS** (ED):  $m/z$  (%) 174 ( $M^+$ , 25.60), 91 (100).

#### 1-methyl-4-(3,3,3-trifluoropropyl)benzene (2-2, p4-33)

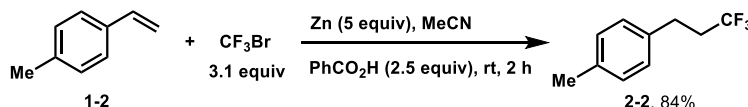

Prepared according to the general procedure using alkene **1-2** (132  $\mu\text{L}$ ,  $d = 0.897 \text{ g/mL}$ , 1.0 mmol), CF<sub>3</sub>Br (3.1 mmol), Zn (328.0 mg, 5.0 mmol), PhCO<sub>2</sub>H (305.8 mg, 2.5 mmol) and MeCN (3 mL). After stirring for 2 h at rt, the reaction mixture was added sat. Na<sub>2</sub>CO<sub>3</sub> aq. (3 mL) and stirred for 15 min, then directly purified by silica gel chromatography (pentane) to afford **2-2** (158.0 mg, 84% yield) as a colorless oil.

**TLC:**  $R_f = 0.78$  in petroleum ether.

**$^1\text{H NMR}$**  (400 MHz,  $\text{CDCl}_3$ )  $\delta$  7.13–7.07 (m, 4H), 2.85–2.81 (m, 2H), 2.42–2.30 (m, 5H).

**$^{13}\text{C NMR}$**  (101 MHz,  $\text{CDCl}_3$ )  $\delta$  136.35, 136.13, 129.54, 128.24, 126.94 (q,  $J = 276.2$  Hz), 35.91 (q,  $J = 28.1$  Hz), 27.94 (q,  $J = 3.6$  Hz), 21.09.

**$^{19}\text{F NMR}$**  (376 MHz,  $\text{CDCl}_3$ ):  $\delta$  -67.21.

**IR** (neat): 2926, 2856, 1455, 1387, 1307, 1257, 1141, 1809, 808.

**MS** (EI):  $m/z$  (%) 188 ( $\text{M}^+$ , 30.96), 105 (100).

**HRMS** (EI):  $m/z$  calc'd for  $\text{C}_{10}\text{H}_{11}\text{F}_3$  ( $\text{M}^+$ ): 188.0807, found 188.0807.

### 1-methoxy-4-(3,3,3-trifluoropropyl)benzene (2-3, p4-35)

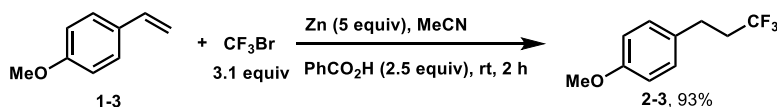

Prepared according to the general procedure using alkene **1-3** (133  $\mu\text{L}$ ,  $d = 1.009$  g/mL, 1.0 mmol),  $\text{CF}_3\text{Br}$  (3.1 mmol), Zn (328.0 mg, 5.0 mmol),  $\text{PhCO}_2\text{H}$  (305.8 mg, 2.5 mmol) and MeCN (3 mL). After stirring for 2 h at rt, the reaction mixture was added sat.  $\text{Na}_2\text{CO}_3$  aq. (3 mL) and stirred for 15 min, then directly purified by silica gel chromatography (pentane) to afford **2-3**<sup>2</sup> (190.0 mg, 93% yield) as a colorless oil.

**TLC:**  $R_f = 0.34$  in petroleum ether.

**$^1\text{H NMR}$**  (400 MHz,  $\text{CDCl}_3$ )  $\delta$  7.13–7.09 (m, 2H), 6.87–6.83 (m, 2H), 3.79 (s, 3H), 2.83–2.79 (m, 2H), 2.41–2.29 (m, 2H).

**$^{13}\text{C NMR}$**  (101 MHz,  $\text{CDCl}_3$ )  $\delta$  158.51, 131.18, 129.30, 126.89 (q,  $J = 276.7$  Hz), 114.24, 55.35, 36.02 (q,  $J = 28.0$  Hz), 27.46 (q,  $J = 3.1$  Hz).

**$^{19}\text{F NMR}$**  (376 MHz,  $\text{CDCl}_3$ ):  $\delta$  -67.16.

**MS** (EI):  $m/z$  (%) 204 ( $\text{M}^+$ , 27.94), 121 (100).

### 1-(trifluoromethyl)-4-(3,3,3-trifluoropropyl)benzene (2-4, p4-36)

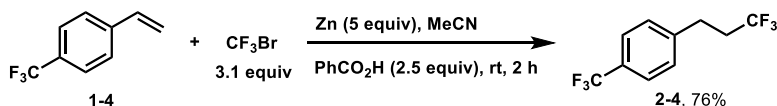

Prepared according to the general procedure using alkene **1-4** (148  $\mu\text{L}$ ,  $d = 1.165$  g/mL, 1.0 mmol),  $\text{CF}_3\text{Br}$  (3.1 mmol), Zn (327.0 mg, 5.0 mmol),  $\text{PhCO}_2\text{H}$  (305.3 mg, 2.5 mmol) and MeCN (3 mL). After stirring for 2 h at rt, the reaction mixture was added sat.  $\text{Na}_2\text{CO}_3$  aq. (3 mL) and stirred for 15 min, then directly purified by silica gel chromatography (pentane) to afford **2-4** (184.0 mg, 76% yield) as a colorless oil.

**TLC:**  $R_f = 0.72$  in petroleum ether.

**$^1\text{H NMR}$**  (400 MHz,  $\text{CDCl}_3$ )  $\delta$  7.58 (d,  $J = 7.9$  Hz, 2H), 7.32 (d,  $J = 7.9$  Hz, 2H), 2.96–2.92 (m, 2H), 2.47–2.35 (m, 2H).

<sup>13</sup>C NMR (101 MHz, CDCl<sub>3</sub>) δ 143.23, 129.36 (q, *J* = 32.7 Hz), 128.78, 126.70 (q, *J* = 276.6 Hz), 125.84 (q, *J* = 3.9 Hz), 124.38 (q, *J* = 271.9 Hz), 35.40 (q, *J* = 28.8 Hz), 28.23 (q, *J* = 3.4 Hz).

<sup>19</sup>F NMR (376 MHz, CDCl<sub>3</sub>): δ -63.05, -67.12.

IR (neat): 2956, 2855, 1327, 1259, 1225, 1168, 1131, 829.

MS (EI): *m/z* (%) 242 (M<sup>+</sup>, 42.56), 159 (100).

HRMS (EI): *m/z* calc'd for C<sub>10</sub>H<sub>8</sub>F<sub>6</sub> (M)<sup>+</sup>: 242.0525, found 242.0525.

#### 4-(3,3,3-trifluoropropyl)-1,1'-biphenyl (2-5, p3-195-1)

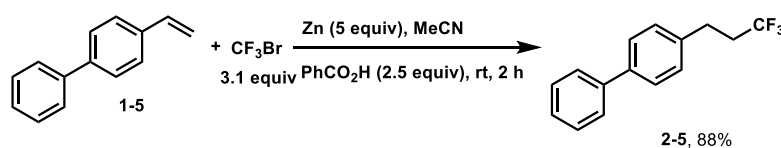

Prepared according to the general procedure using alkene **1-5** (180.3 mg, 1.0 mmol), CF<sub>3</sub>Br (3.1 mmol), Zn (327.0 mg, 5.0 mmol), PhCO<sub>2</sub>H (305.3 mg, 2.5 mmol) and MeCN (3 mL). After stirring for 2 h at rt, the reaction mixture was added sat. Na<sub>2</sub>CO<sub>3</sub> aq. (3 mL) and stirred for 15 min, then directly purified by silica gel chromatography (pentane) to afford **2-5**<sup>3</sup> (220.0 mg, 88% yield) as a white solid.

TLC: R<sub>f</sub> = 0.78 in petroleum ether.

m.p.: 82.8~83.7 °C.

<sup>1</sup>H NMR (400 MHz, CDCl<sub>3</sub>) δ 7.59–7.54 (m, 4H), 7.45–7.42 (m, 2H), 7.36–7.32 (m, 1H), 7.27 (d, *J* = 8.0 Hz, 2H), 2.94–2.90 (m, 2H), 2.49–2.37 (m, 2H).

<sup>13</sup>C NMR (101 MHz, CDCl<sub>3</sub>) δ 140.89, 139.82, 138.18, 128.93, 128.78, 127.58, 127.41, 127.16, 126.85 (q, *J* = 277.0 Hz), 35.76 (q, *J* = 28.3 Hz), 27.99 (q, *J* = 3.2 Hz).

<sup>19</sup>F NMR (376 MHz, CDCl<sub>3</sub>): δ -67.15.

MS (EI): *m/z* (%) 250 (M<sup>+</sup>, 48.41), 167 (100).

#### 1-(*tert*-butyl)-4-(3,3,3-trifluoropropyl)benzene (2-6, p4-71)

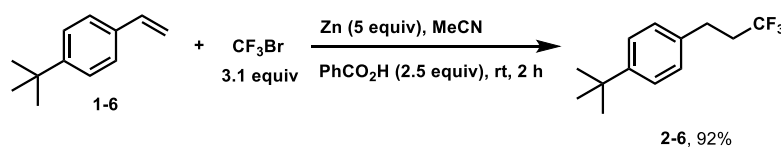

Prepared according to the general procedure using alkene **1-6** (183 μL, d = 0.875 g/mL, 1.0 mmol), CF<sub>3</sub>Br (3.1 mmol), Zn (328.3 mg, 5.0 mmol), PhCO<sub>2</sub>H (306.2 mg, 2.5 mmol) and MeCN (3 mL). After stirring for 2 h at rt, the reaction mixture was added sat. Na<sub>2</sub>CO<sub>3</sub> aq. (3 mL) and stirred for 15 min, then directly purified by silica gel chromatography (pentane) to afford **2-6**<sup>4</sup> (211.0 mg, 92% yield) as a colorless oil.

TLC: R<sub>f</sub> = 0.64 in petroleum ether.

<sup>1</sup>H NMR (400 MHz, CDCl<sub>3</sub>) δ 7.34 (d, *J* = 8.1 Hz, 2H), 7.13 (d, *J* = 8.0 Hz, 2H), 2.86–2.82 (m, 2H), 2.44–2.32 (m, 2H), 1.31 (s, 9H).

<sup>13</sup>C NMR (101 MHz, CDCl<sub>3</sub>) δ 149.73, 136.09, 128.31, 126.93 (q, *J* = 276.7 Hz), 125.76, 35.81 (q, *J* = 28.4 Hz), 34.58, 31.50, 27.78 (q, *J* = 3.1 Hz).

<sup>19</sup>F NMR (376 MHz, CDCl<sub>3</sub>): δ -67.26.

MS (EI): *m/z* (%) 230 (M<sup>+</sup>, 30.86), 215 (100).

#### 1-fluoro-4-(3,3,3-trifluoropropyl)benzene (2-7, p4-58)

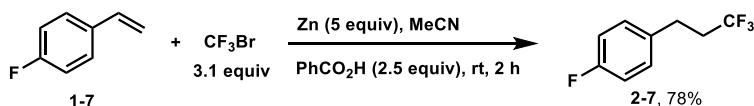

Prepared according to the general procedure using alkene **1-7** (119 μL, *d* = 1.024 g/mL, 1.0 mmol), CF<sub>3</sub>Br (3.1 mmol), Zn (327.0 mg, 5.0 mmol), PhCO<sub>2</sub>H (305.3 mg, 2.5 mmol) and MeCN (3 mL). After stirring for 2 h at rt, the reaction mixture was added sat. Na<sub>2</sub>CO<sub>3</sub> aq. (3 mL) and stirred for 15 min, then directly purified by silica gel chromatography (pentane) to afford **2-7**<sup>4</sup> (149.0 mg, 78% yield) as a colorless oil.

TLC: *R<sub>f</sub>* = 0.77 in petroleum.

<sup>1</sup>H NMR (400 MHz, CDCl<sub>3</sub>) δ 7.17–7.14 (m, 2H), 7.02–6.98 (m, 2H), 2.87–2.83 (m, 2H), 2.43–2.31 (m, 2H).

<sup>13</sup>C NMR (101 MHz, CDCl<sub>3</sub>) δ 161.87 (d, *J* = 244.8 Hz), 134.82 (d, *J* = 3.0 Hz), 129.82 (d, *J* = 8.0 Hz), 126.77 (q, *J* = 276.8 Hz), 115.67 (d, *J* = 21.5 Hz), 35.89 (q, *J* = 28.4 Hz), 27.61 (q, *J* = 3.3 Hz).

<sup>19</sup>F NMR (376 MHz, CDCl<sub>3</sub>): δ -67.14, -116.93.

MS (EI): *m/z* (%) 192 (M<sup>+</sup>, 39.52), 109 (100).

#### 1-chloro-4-(3,3,3-trifluoropropyl)benzene (2-8, p4-38)

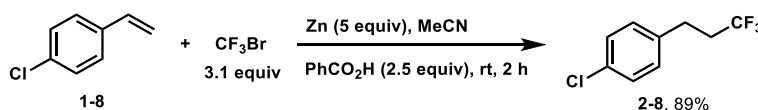

Prepared according to the general procedure using alkene **1-8** (120 μL, *d* = 1.155 g/mL, 1.0 mmol), CF<sub>3</sub>Br (3.1 mmol), Zn (328.6 mg, 5.0 mmol), PhCO<sub>2</sub>H (305.8 mg, 2.5 mmol) and MeCN (3 mL). After stirring for 2 h at rt, the reaction mixture was added sat. Na<sub>2</sub>CO<sub>3</sub> aq. (3 mL) and stirred for 15 min, then directly purified by silica gel chromatography (pentane) to afford **2-8**<sup>1</sup> (185.0 mg, 89% yield) as a colorless oil.

TLC: *R<sub>f</sub>* = 0.77 in petroleum ether.

<sup>1</sup>H NMR (400 MHz, CDCl<sub>3</sub>) δ 7.30–7.26 (m, 2H), 7.15–7.11 (m, 2H), 2.87–2.83 (m, 2H), 2.43–2.31 (m, 2H).

$^{13}\text{C}$  NMR (101 MHz,  $\text{CDCl}_3$ )  $\delta$  137.55, 132.65, 129.72, 128.98, 126.70 (q,  $J = 276.8$  Hz), 35.62 (q,  $J = 28.6$  Hz), 27.75 (q,  $J = 3.2$  Hz).

$^{19}\text{F}$  NMR (376 MHz,  $\text{CDCl}_3$ ):  $\delta$  -67.11.

MS (EI):  $m/z$  (%) 208 ( $\text{M}^+$ , 33.18), 125 (100).

#### 1-bromo-4-(3,3,3-trifluoropropyl)benzene (2-9, p4-32)

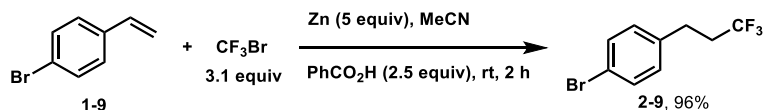

Prepared according to the general procedure using alkene **1-9** (131  $\mu\text{L}$ ,  $d = 1.40$  g/mL, 1.0 mmol),  $\text{CF}_3\text{Br}$  (3.1 mmol),  $\text{Zn}$  (327.9 mg, 5.0 mmol),  $\text{PhCO}_2\text{H}$  (305.6 mg, 2.5 mmol) and  $\text{MeCN}$  (3 mL). After stirring for 2 h at rt, the reaction mixture was added sat.  $\text{Na}_2\text{CO}_3$  aq. (3 mL) and stirred for 15 min, then directly purified by silica gel chromatography (pentane) to afford **2-9**<sup>4</sup> (244.0 mg, 96% yield) as a colorless oil.

TLC:  $R_f = 0.79$  in petroleum ether.

$^1\text{H}$  NMR (400 MHz,  $\text{CDCl}_3$ )  $\delta$  7.44 (d,  $J = 8.4$  Hz, 2H), 7.08 (d,  $J = 8.4$  Hz, 2H), 2.85–2.81 (m, 2H), 2.43–2.31 (m, 2H).

$^{13}\text{C}$  NMR (101 MHz,  $\text{CDCl}_3$ )  $\delta$  138.05, 131.94, 130.11, 126.65 (q,  $J = 276.8$  Hz), 120.64, 35.56 (q,  $J = 28.6$  Hz), 27.82 (q,  $J = 3.3$  Hz).

$^{19}\text{F}$  NMR (376 MHz,  $\text{CDCl}_3$ ):  $\delta$  -67.11.

MS (EI):  $m/z$  (%) 252 ( $\text{M}^+$  ( $^{79}\text{Br}$ ), 59.36), 254 ( $\text{M}^+$  ( $^{81}\text{Br}$ ), 57.23), 169 (100).

#### 4-(3,3,3-trifluoropropyl)phenyl acetate (2-10, p4-91)

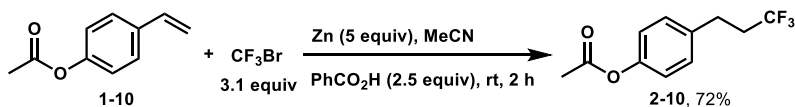

Prepared according to the general procedure using alkene **1-10** (153  $\mu\text{L}$ ,  $d = 1.06$  g/mL, 1.0 mmol),  $\text{CF}_3\text{Br}$  (3.1 mmol),  $\text{Zn}$  (327.0 mg, 5.0 mmol),  $\text{PhCO}_2\text{H}$  (305.3 mg, 2.5 mmol) and  $\text{MeCN}$  (3 mL). After stirring for 2 h at rt, the reaction mixture was added sat.  $\text{Na}_2\text{CO}_3$  aq. (3 mL) and stirred for 15 min, then filtered through a pad of Celite eluting with DCM (40 mL). The resulting solution was washed with  $\text{Na}_2\text{CO}_3$  aq. (2 mL) in  $\text{H}_2\text{O}$  (15 mL) for 3 times. Then the DCM solution was washed with sat.  $\text{NaCl}$  aq. and dried over anhydrous  $\text{Na}_2\text{SO}_4$ . The solution was concentrated, and the residue was purified by silica gel chromatography (pentane : DCM = 4:1) to afford **2-10**<sup>1</sup> (168.0 mg, 72% yield) as a light yellow oil.

TLC:  $R_f = 0.34$  in 10:1 petroleum ether/EtOAc.

$^1\text{H}$  NMR (400 MHz,  $\text{CDCl}_3$ )  $\delta$  7.22–7.19 (m, 2H), 7.05–7.02 (m, 2H), 2.89–2.85 (m, 2H), 2.44–2.31 (m, 2H), 2.30 (s, 3H).



<sup>13</sup>C NMR (101 MHz, CDCl<sub>3</sub>) δ 169.62, 149.49, 136.61, 129.30, 126.73 (q, *J* = 276.6 Hz), 121.91, 35.69 (q, *J* = 28.4 Hz), 27.71 (q, *J* = 3.3 Hz), 21.14.

<sup>19</sup>F NMR (376 MHz, CDCl<sub>3</sub>): δ -67.21.

MS (EI): *m/z* (%) 232 (M<sup>+</sup>, 5.50), 107 (100).

#### *N*-(4-(3,3,3-trifluoropropyl)phenyl)acetamide (**2-11**, p4-123)

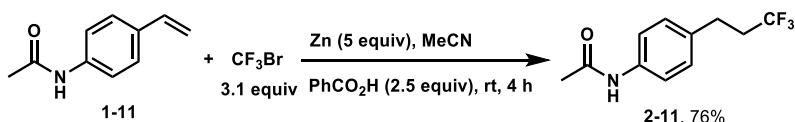

Prepared according to the general procedure using alkene **1-11** (161.2 mg, 1.0 mmol), CF<sub>3</sub>Br (3.1 mmol), Zn (328.2 mg, 5.0 mmol), PhCO<sub>2</sub>H (305.8 mg, 2.5 mmol) and MeCN (3 mL). After stirring for 4 h at rt, the reaction mixture was added sat. Na<sub>2</sub>CO<sub>3</sub> aq. (3 mL) and stirred for 15 min, then filtered through a pad of Celite eluting with DCM (30 mL). The resulting solution was concentrated, and the residue was purified by silica gel chromatography (DCM : EtOAc = 10 : 1) to afford **2-11** (176.0 mg, 76% yield) as a white solid.

TLC: *R<sub>f</sub>* = 0.30 in 1:1 petroleum ether/EtOAc.

m.p.: 149.1~152.2 °C.

<sup>1</sup>H NMR (400 MHz, CDCl<sub>3</sub>) δ 7.44 (d, *J* = 8.3 Hz, 2H), 7.16–7.14 (m, 3H), 2.86–2.82 (m, 2H), 2.42–2.30 (m, 2H), 2.17 (s, 3H).

<sup>13</sup>C NMR (101 MHz, CDCl<sub>3</sub>) δ 168.66, 136.62, 135.06, 128.82, 126.77 (q, *J* = 276.7 Hz), 120.48, 35.73 (q, *J* = 28.1 Hz), 27.74 (q, *J* = 3.4 Hz), 24.59.

<sup>19</sup>F NMR (376 MHz, CDCl<sub>3</sub>): δ -67.14.

IR (neat): 3303, 3264, 3199, 3135, 3085, 2982, 2951, 1686, 1668, 1553, 1516, 1413, 1377, 1324, 1307, 1249, 1212, 1138, 1079, 976, 866, 823, 726.

MS (EI): *m/z* (%) 231 (M<sup>+</sup>, 20.40), 106 (100).

HRMS (ESI<sup>+</sup>): *m/z* calc'd for C<sub>11</sub>H<sub>13</sub>F<sub>3</sub>NO (M + H)<sup>+</sup>: 232.0944, found 232.0946.

#### 1-(4-(3,3,3-trifluoropropyl)phenyl)ethan-1-one (**2-12**, p6-41)

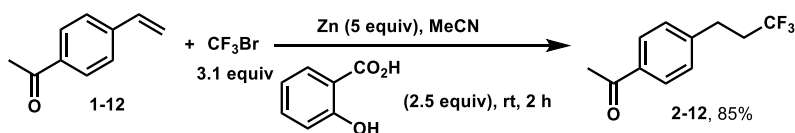

Prepared according to the general procedure using alkene **1-12** (146.2 mg, 1.0 mmol), CF<sub>3</sub>Br (3.1 mmol), Zn (327.0 mg, 5.0 mmol), salicylic acid (345.3 mg, 2.5 mmol) and MeCN (3 mL). After stirring for 2 h at rt, the reaction mixture was added sat. Na<sub>2</sub>CO<sub>3</sub> aq. (3 mL) and stirred for 15 min and concentrated. The residue was extracted with DCM (20 mL × 3), washed with sat. NaCl aq., dried over Na<sub>2</sub>SO<sub>4</sub> and concentrated. The residue was directly purified by silica gel chromatography (petroleum ether : EtOAc = 15:1) to afford **2-12**<sup>5</sup> (184.7 mg, 85% yield)

as a light yellow oil.

**TLC:**  $R_f$  = 0.33 in petroleum ether/EtOAc (10:1).

**$^1\text{H}$  NMR** (400 MHz,  $\text{CDCl}_3$ )  $\delta$  7.92 (d,  $J$  = 8.0 Hz, 2H), 7.30 (d,  $J$  = 7.9 Hz, 2H), 2.96–2.92 (m, 2H), 2.59 (s, 3H), 2.48–2.36 (m, 2H).

**$^{13}\text{C}$  NMR** (101 MHz,  $\text{CDCl}_3$ )  $\delta$  197.59, 144.51, 135.85, 128.85, 128.51, 126.61 (q,  $J$  = 276.6 Hz), 35.10 (q,  $J$  = 28.7 Hz), 28.20 (q,  $J$  = 3.2 Hz), 26.50.

**$^{19}\text{F}$  NMR** (376 MHz,  $\text{CDCl}_3$ ):  $\delta$  -67.09.

**MS** (EI):  $m/z$  (%) 216 ( $\text{M}^+$ , 19.15), 201 (100).

### 1-methyl-2-(3,3,3-trifluoropropyl)benzene (2-13, p4-39)

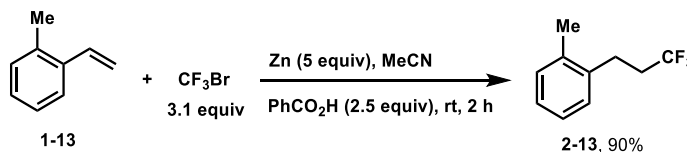

Prepared according to the general procedure using alkene **1-13** (129  $\mu\text{L}$ ,  $d$  = 0.914 g/mL, 1.0 mmol),  $\text{CF}_3\text{Br}$  (3.1 mmol),  $\text{Zn}$  (329.5 mg, 5.0 mmol),  $\text{PhCO}_2\text{H}$  (307.6 mg, 2.5 mmol) and  $\text{MeCN}$  (3 mL). After stirring for 2 h at rt, the reaction mixture was added sat.  $\text{Na}_2\text{CO}_3$  aq. (3 mL) and stirred for 15 min, then directly purified by silica gel chromatography (pentane) to afford **2-13** (170.0 mg, 90% yield) as a colorless oil.

**TLC:**  $R_f$  = 0.76 in petroleum ether.

**$^1\text{H}$  NMR** (400 MHz,  $\text{CDCl}_3$ )  $\delta$  7.17–7.11 (m, 4H), 2.88–2.84 (m, 2H), 2.39–2.27 (m, 5H).

**$^{13}\text{C}$  NMR** (101 MHz,  $\text{CDCl}_3$ )  $\delta$  137.33, 136.02, 130.67, 128.73, 126.98, 126.96 (q,  $J$  = 276.6 Hz), 126.50, 34.59 (q,  $J$  = 28.3 Hz), 25.71 (q,  $J$  = 3.3 Hz), 19.16.

**$^{19}\text{F}$  NMR** (376 MHz,  $\text{CDCl}_3$ ):  $\delta$  -67.38.

**IR** (neat): 3070, 3026, 2956, 2932, 1497, 1459, 1382, 1309, 1257, 1140, 1081, 810, 758, 743.

**MS** (EI):  $m/z$  (%) 188 ( $\text{M}^+$ , 50.44), 105 (100).

**HRMS** (EI):  $m/z$  calc'd for  $\text{C}_{10}\text{H}_{11}\text{F}_3$  ( $\text{M}^+$ ): 188.0807, found 188.0807.

### 1-methyl-3-(3,3,3-trifluoropropyl)benzene (2-14, p4-49)

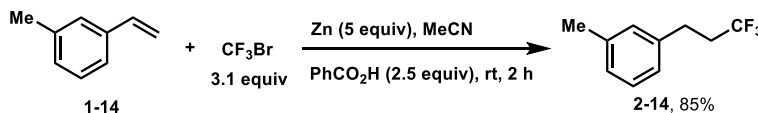

Prepared according to the general procedure using alkene **1-14** (131  $\mu\text{L}$ ,  $d$  = 0.901 g/mL, 1.0 mmol),  $\text{CF}_3\text{Br}$  (3.1 mmol),  $\text{Zn}$  (329.5 mg, 5.0 mmol),  $\text{PhCO}_2\text{H}$  (306.6 mg, 2.5 mmol) and  $\text{MeCN}$  (3 mL). After stirring for 2 h at rt, the reaction mixture was added sat.  $\text{Na}_2\text{CO}_3$  aq. (3 mL) and stirred for 15 min, then directly purified by silica gel chromatography (pentane) to afford **2-14** (160.0 mg, 85% yield) as a colorless oil.

**TLC:**  $R_f$  = 0.79 in petroleum ether.

**<sup>1</sup>H NMR** (400 MHz, CDCl<sub>3</sub>) δ 7.20 (t, *J* = 7.5 Hz, 1H), 7.06–6.99 (m, 3H), 2.85–2.81 (m, 2H), 2.44–2.28 (m, 5H).

**<sup>13</sup>C NMR** (101 MHz, CDCl<sub>3</sub>) δ 139.13, 138.52, 129.17, 128.76, 127.52, 126.93 (q, *J* = 276.8 Hz), 125.35, 35.84 (q, *J* = 28.1 Hz), 28.26 (q, *J* = 3.2 Hz), 21.43.

**<sup>19</sup>F NMR** (376 MHz, CDCl<sub>3</sub>): δ -67.25.

**IR** (neat): 3028, 2951, 2928, 2875, 1612, 1488, 1440, 1384, 1312, 1281, 1261, 1245, 1222, 1110, 847, 700.

**MS** (EI): *m/z* (%) 188 (M<sup>+</sup>, 53.90), 105 (100).

**HRMS** (ESI<sup>+</sup>): *m/z* calc'd for C<sub>10</sub>H<sub>11</sub>F<sub>3</sub> (M)<sup>+</sup>: 188.0807, found 188.0805.

### 1-bromo-3-(3,3,3-trifluoropropyl)benzene (2-15, p4-50)

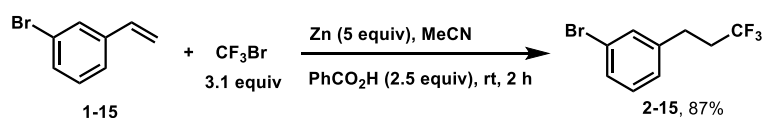

Prepared according to the general procedure using alkene **1-15** (132 μL, *d* = 1.406 g/mL, 1.0 mmol), CF<sub>3</sub>Br (3.1 mmol), Zn (329.3 mg, 5.0 mmol), PhCO<sub>2</sub>H (307.5 mg, 2.5 mmol) and MeCN (3 mL). After stirring for 2 h at rt, the reaction mixture was added sat. Na<sub>2</sub>CO<sub>3</sub> aq. (3 mL) and stirred for 15 min, then directly purified by silica gel chromatography (pentane) to afford **2-15**<sup>1</sup> (219.0 mg, 87% yield) as a colorless oil.

**TLC**: R<sub>f</sub> = 0.79 in petroleum ether.

**<sup>1</sup>H NMR** (400 MHz, CDCl<sub>3</sub>) δ 7.39–7.36 (m, 2H), 7.21–7.11 (m, 2H), 2.87–2.83 (m, 2H), 2.44–2.32 (m, 2H).

**<sup>13</sup>C NMR** (101 MHz, CDCl<sub>3</sub>) δ 141.36, 131.47, 130.41, 129.99, 127.04, 126.64 (q, *J* = 276.6 Hz), 122.85, 35.50 (q, *J* = 28.6 Hz), 28.00 (q, *J* = 3.1 Hz).

**<sup>19</sup>F NMR** (376 MHz, CDCl<sub>3</sub>): δ -67.17.

**MS** (EI): *m/z* (%) 252 (M<sup>+</sup> (<sup>79</sup>Br), 83.81), 254 (M<sup>+</sup> (<sup>81</sup>Br), 81.66), 169 (100).

### 2-(3,3,3-trifluoropropyl)naphthalene (2-16, p4-114)

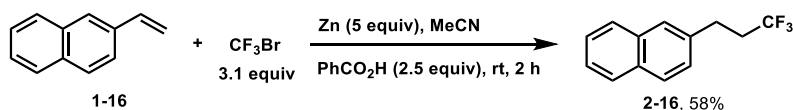

Prepared according to the general procedure using alkene **1-16** (155.4 mg, 1.0 mmol), CF<sub>3</sub>Br (3.1 mmol), Zn (327.0 mg, 5.0 mmol), PhCO<sub>2</sub>H (305.8 mg, 2.5 mmol) and MeCN (3 mL). After stirring for 2 h at rt, the reaction mixture was added sat. Na<sub>2</sub>CO<sub>3</sub> aq. (3 mL) and stirred for 15 min, then filtered through a pad of Celite eluting with DCM (30 mL). The resulting solution was concentrated, and the residue was purified by silica gel chromatography (pentane) to afford **2-16**<sup>1</sup> (130.0 mg, 58% yield) as a white solid.

**TLC:**  $R_f$  = 0.52 in petroleum ether.

**$^1\text{H NMR}$**  (400 MHz,  $\text{CDCl}_3$ )  $\delta$  7.83–7.78 (m, 3H), 7.65 (s, 1H), 7.50–7.43 (m, 2H), 7.32 (dd,  $J$  = 8.4, 1.8 Hz, 1H), 3.06–3.02 (m, 2H), 2.55–2.43 (m, 2H).

**$^{13}\text{C NMR}$**  (101 MHz,  $\text{CDCl}_3$ )  $\delta$  136.56, 133.73, 132.42, 128.56, 127.81, 127.62, 126.89 (q,  $J$  = 276.7 Hz), 126.74, 126.67, 126.39, 125.80, 35.70 (q,  $J$  = 28.3 Hz), 28.50 (q,  $J$  = 3.1 Hz).

**$^{19}\text{F NMR}$**  (376 MHz,  $\text{CDCl}_3$ ):  $\delta$  -67.10.

**MS** (EI):  $m/z$  (%) 224 ( $\text{M}^+$ , 39.88), 141 (100).

**(8*R*,9*S*,13*S*,14*S*)-13-methyl-3-(3,3,3-trifluoropropyl)-6,7,8,9,11,12,13,14,15,16-decahydro-17*H*-cyclopenta[*a*]phenanthren-17-one (2-17, p5-18)**

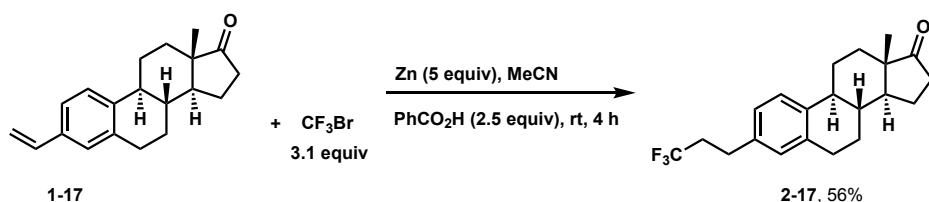

Prepared according to the general procedure using alkene **1-17** (283.2 mg, 1.0 mmol),  $\text{CF}_3\text{Br}$  (3.1 mmol), Zn (327.0 mg, 5.0 mmol),  $\text{PhCO}_2\text{H}$  (305.3 mg, 2.5 mmol) and MeCN (3 mL). After stirring for 4 h at rt, the reaction mixture was filtered through a pad of Celite eluting with DCM (30 mL) and concentrated. The residue was extracted with DCM (15 mL  $\times$  3), washed with sat. NaCl aq. (20 mL), dried over  $\text{Na}_2\text{SO}_4$ , and concentrated. The residue was purified by silica gel chromatography (petroleum ether : EtOAc = 20:1 to 10:1) to afford **2-17** (196.0 mg, 56% yield) as a white solid.

**TLC:**  $R_f$  = 0.35 in 10:1 petroleum ether/EtOAc.

**m.p.:** 59.9~64.6  $^\circ\text{C}$ .

**$^1\text{H NMR}$**  (400 MHz,  $\text{CDCl}_3$ )  $\delta$  7.25 (d,  $J$  = 9.0 Hz, 1H), 7.01–6.98 (m, 1H), 6.94 (s, 1H), 2.90 (dd,  $J$  = 9.0, 4.2 Hz, 2H), 2.83–2.79 (m, 2H), 2.54–2.48 (m, 1H), 2.45–2.26 (m, 4H), 2.19–1.93 (m, 4H), 1.68–1.39 (m, 6H), 0.91 (s, 3H).

**$^{13}\text{C NMR}$**  (101 MHz,  $\text{CDCl}_3$ )  $\delta$  220.94, 138.27, 136.99, 136.59, 128.97, 126.86 (q,  $J$  = 276.5 Hz), 125.84, 125.74, 50.65, 48.12, 44.42, 38.32, 35.98, 35.77 (q,  $J$  = 28.2 Hz), 31.74, 29.48, 27.76 (q,  $J$  = 3.3 Hz), 26.62, 25.87, 21.72, 13.97.

**$^{19}\text{F NMR}$**  (376 MHz,  $\text{CDCl}_3$ ):  $\delta$  -67.25.

**IR** (neat): 2945, 2922, 2856, 1744, 1500, 1257, 1127, 1096, 975, 888, 823.

**MS** (ESI):  $m/z$  (%) 351 ( $(\text{M} + \text{H})^+$ , 5.37), 102 (100).

**HRMS** (ESI $^+$ ):  $m/z$  calc'd for  $\text{C}_{21}\text{H}_{26}\text{F}_3\text{O}$  ( $\text{M} + \text{H})^+$ : 351.1930, found 351.1932.

#### (4,4,4-trifluorobutyl)benzene (**2-18a**, p4-88)

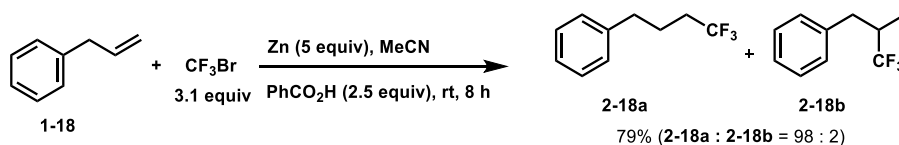

Prepared according to the general procedure using alkene **1-18** (133  $\mu\text{L}$ ,  $d = 0.892 \text{ g/mL}$ , 1.0 mmol),  $\text{CF}_3\text{Br}$  (3.1 mmol), Zn (328.0 mg, 5.0 mmol), PhCO<sub>2</sub>H (305.8 mg, 2.5 mmol) and MeCN (3 mL). After stirring for 8 h at rt, the reaction mixture was added sat. KMnO<sub>4</sub> aq. (1 mL) for 15 min in an ice-bath, and Na<sub>2</sub>CO<sub>3</sub> aq. (3 mL) for 15 min, then directly purified by silica gel chromatography (pentane) to afford **2-18** (148.0 mg, 79% yield) as a colorless oil. The NMR of **2-18b** is consistent with the literature.<sup>1</sup> The ratio of **2-18a** and **2-18b** was calculated as 98:2 by <sup>1</sup>H NMR and <sup>19</sup>F NMR.

#### **2-18a**<sup>6</sup>

**TLC:**  $R_f = 0.84$  in petroleum ether.

**<sup>1</sup>H NMR** (400 MHz, CDCl<sub>3</sub>)  $\delta$  7.33–7.29 (m, 2H), 7.23–7.17 (m, 3H), 2.69 (t,  $J = 7.6 \text{ Hz}$ , 2H), 2.14–2.02 (m, 2H), 1.94–1.86 (m, 2H).

**<sup>13</sup>C NMR** (101 MHz, CDCl<sub>3</sub>)  $\delta$  140.84, 128.69, 128.52, 127.37 (q,  $J = 276.2 \text{ Hz}$ ), 126.40, 34.78, 33.24 (q,  $J = 28.3 \text{ Hz}$ ), 23.66 (q,  $J = 2.8 \text{ Hz}$ ).

**<sup>19</sup>F NMR** (376 MHz, CDCl<sub>3</sub>):  $\delta$  -66.70, -74.00 (**2-18b**).

**MS** (EI):  $m/z$  (%) 188 ( $\text{M}^+$ , 21.84), 91 (100).

#### (5,5,5-trifluoropentyl)benzene (**2-19a**, p5-59)

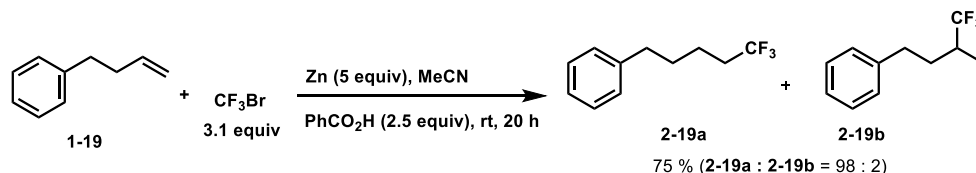

Prepared according to the general procedure using alkene **1-19** (150  $\mu\text{L}$ ,  $d = 0.88 \text{ g/mL}$ , 1.0 mmol),  $\text{CF}_3\text{Br}$  (3.1 mmol), Zn (327.0 mg, 5.0 mmol), PhCO<sub>2</sub>H (305.3 mg, 2.5 mmol) and MeCN (3 mL). After stirring for 20 h at rt, the reaction mixture was added basic KMnO<sub>4</sub> aq. (1 mL) for 15 min in an ice-bath, and Na<sub>2</sub>CO<sub>3</sub> aq. (3 mL) for 15 min, then resulting mixture directly purified by silica gel chromatography (pentane) to afford **2-19** (151.3 mg, 75% yield) as a colorless oil. The NMR of **2-19b** is consistent with the literature.<sup>7</sup> The ratio of **2-19a** and **2-19b** was calculated as 98:2 by <sup>1</sup>H NMR and <sup>19</sup>F NMR.

#### **2-19a**<sup>8</sup>

**TLC:**  $R_f = 0.75$  in petroleum ether.

**<sup>1</sup>H NMR** (400 MHz, CDCl<sub>3</sub>)  $\delta$  7.31–7.27 (m, 2H), 7.22–7.16 (m, 3H), 2.64 (t,  $J = 7.5 \text{ Hz}$ , 2H), 2.15–2.03 (m, 2H), 1.74–1.66 (m, 2H), 1.64–1.56 (m, 2H).

$^{13}\text{C}$  NMR (101 MHz,  $\text{CDCl}_3$ )  $\delta$  141.85, 128.55, 128.49, 127.35 (q,  $J = 276.4$  Hz), 126.09, 35.64, 33.76 (q,  $J = 28.4$  Hz), 30.61, 21.69 (q,  $J = 2.9$  Hz).

$^{19}\text{F}$  NMR (376 MHz,  $\text{CDCl}_3$ ):  $\delta$  -66.85, -73.62 (**2-19b**).

MS (EI):  $m/z$  (%) 202 ( $\text{M}^+$ , 7.14), 91 (100).

### 1,1,1-trifluorotridecane (**2-20a**, p4-113)

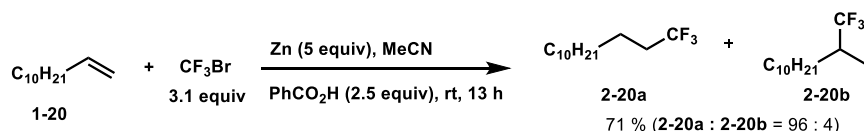

Prepared according to the general procedure using alkene **1-20** (222  $\mu\text{L}$ ,  $d = 0.758$  g/mL, 1.0 mmol),  $\text{CF}_3\text{Br}$  (3.1 mmol), Zn (328.0 mg, 5.0 mmol),  $\text{PhCO}_2\text{H}$  (305.8 mg, 2.5 mmol) and MeCN (3 mL). After stirring for 13 h at rt, the reaction mixture was added basic  $\text{KMnO}_4$  aq. (1 mL) for 15 min in an ice-bath and sat.  $\text{Na}_2\text{CO}_3$  aq. (3 mL) for 15 min, then extracted with pentane (15 mL  $\times$  3) and concentrated. The residue was purified by silica gel chromatography (pentane) to afford **2-20** (170.0 mg, 71% yield) as a colorless oil. The ratio of **2-20a** and **2-20b** was calculated as 96:4 by  $^1\text{H}$  NMR and  $^{19}\text{F}$  NMR.

### **2-20a**<sup>9</sup>

$^1\text{H}$  NMR (400 MHz,  $\text{CDCl}_3$ )  $\delta$  2.12–1.99 (m, 2H), 1.58–1.51 (m, 2H), 1.37–1.26 (m, 18H), 0.88 (t,  $J = 6.8$  Hz, 3H).

$^{13}\text{C}$  NMR (101 MHz,  $\text{CDCl}_3$ )  $\delta$  127.48 (q,  $J = 276.1$  Hz), 33.93 (q,  $J = 28.5$  Hz), 32.11, 29.81, 29.75, 29.56, 29.54, 29.38, 28.91, 22.87, 22.03 (q,  $J = 2.9$  Hz), 14.25.

$^{19}\text{F}$  NMR (376 MHz,  $\text{CDCl}_3$ ):  $\delta$  -66.95, -73.88 (**2-20b**).

MS (EI):  $m/z$  (%) 238 ( $\text{M}^+$ , 2.37), 57 (100).

### methyl 12,12,12-trifluorododecanoate (**2-21a**, p5-46)

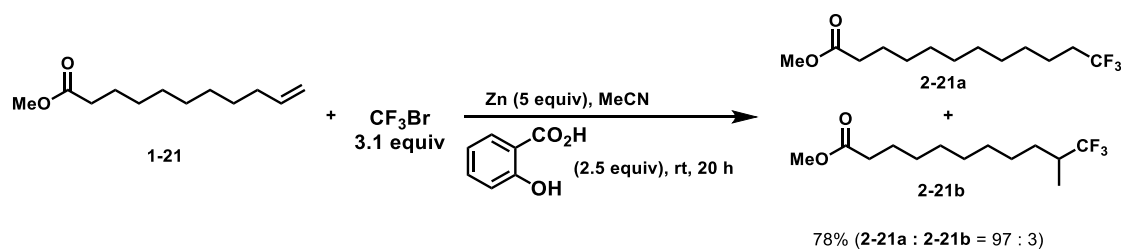

Prepared according to the general procedure using alkene **1-21** (225  $\mu\text{L}$ ,  $d = 0.882$  g/mL, 1.0 mmol),  $\text{CF}_3\text{Br}$  (3.1 mmol), Zn (327.0 mg, 5.0 mmol), salicylic acid (345.3 mg, 2.5 mmol) and MeCN (3 mL). After stirring for 20 h at rt, the reaction mixture was added sat.  $\text{Na}_2\text{CO}_3$  aq. (3 mL) for 15 min., and filtered through a pad of Celite eluting with petroleum ether (30 mL). The resulting solution was concentrated, and the residue was dissolved in MeCN (5 mL), and added sat.  $\text{KMnO}_4$  aq. (2 mL) for 15 min in an ice-bath. The resulting solution was filtered through a pad of Celite eluting with DCM (30 mL) and concentrated. The residue was

extracted with petroleum ether (15 mL  $\times$  3), washed with sat. NaCl aq., dried over Na<sub>2</sub>SO<sub>4</sub>, and concentrated. The residue was purified by silica gel chromatography (petroleum ether : EtOAc = 50:1) to afford **2-21** (209.1 mg, 78% yield) as a light yellow oil. The ratio of **2-21a** and **2-21b** was calculated as 97:3 by <sup>1</sup>H NMR and <sup>19</sup>F NMR.

#### **2-21a**<sup>10</sup>

**TLC:** *R<sub>f</sub>* = 0.36 in 30:1 petroleum ether/EtOAc.

**<sup>1</sup>H NMR** (400 MHz, CDCl<sub>3</sub>)  $\delta$  3.67 (s, 3H), 2.30 (t, *J* = 7.5 Hz, 2H), 2.12–1.99 (m, 2H), 1.66–1.51 (m, 4H), 1.37–1.28 (m, 12H).

**<sup>13</sup>C NMR** (101 MHz, CDCl<sub>3</sub>)  $\delta$  174.20, 127.34 (q, *J* = 276.3 Hz), 51.31 (t, *J* = 4.3 Hz), 34.06 (t, *J* = 2.7 Hz), 33.74 (q, *J* = 28.4 Hz), 29.37, 29.32, 29.25, 29.20, 29.15, 28.73, 24.97, 21.89.

**<sup>19</sup>F NMR** (376 MHz, CDCl<sub>3</sub>):  $\delta$  -66.94, -73.87 (**2-21b**).

**MS** (EI): *m/z* 268 (%) (M<sup>+</sup>, 2.28), 74 (100).

#### **2-methoxyphenyl 6,6,6-trifluorohexanoate (2-22a, p4-187)**

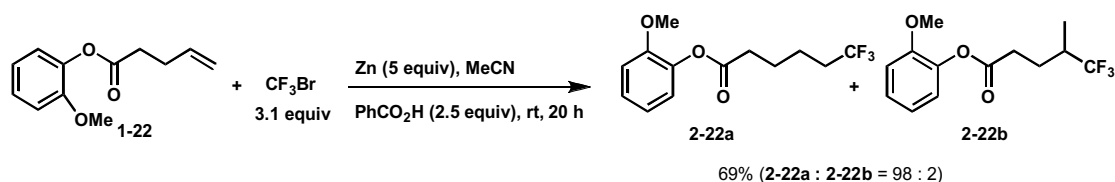

Prepared according to the general procedure using alkene **1-22** (214.6 mg, 1.04 mmol), CF<sub>3</sub>Br (3.1 mmol), Zn (328.7 mg, 5.0 mmol), PhCO<sub>2</sub>H (306.5 mg, 2.5 mmol) and MeCN (3 mL). After stirring for 20 h at rt, the reaction mixture was added sat. Na<sub>2</sub>CO<sub>3</sub> aq. (3 mL) for 15 min., and filtered through a pad of Celite eluting with DCM (30 mL) and concentrated. The residue was extracted with DCM (15 mL  $\times$  3), washed with sat. NaCl aq., dried over Na<sub>2</sub>SO<sub>4</sub>, and concentrated. The residue was purified by silica gel chromatography (petroleum ether : EtOAc = 40:1 to 30:1) to afford **2-22** (198.6 mg, 69% yield) as a light yellow oil. The ratio of **2-22a** and **2-22b** was calculated as 98:2 by <sup>1</sup>H NMR and <sup>19</sup>F NMR.

#### **2-22a**

**TLC:** *R<sub>f</sub>* = 0.48 in 10:1 petroleum ether/EtOAc.

**<sup>1</sup>H NMR** (400 MHz, CDCl<sub>3</sub>)  $\delta$  7.23–7.19 (m, 1H), 7.02 (dd, *J* = 7.9, 1.8 Hz, 1H), 6.98–6.94 (m, 2H), 3.82 (s, 3H), 2.63 (t, *J* = 7.1 Hz, 2H), 2.24–2.09 (m, 2H), 1.89–1.82 (m, 2H), 1.77–1.71 (m, 2H).

**<sup>13</sup>C NMR** (101 MHz, CDCl<sub>3</sub>)  $\delta$  171.16, 151.20, 139.83, 127.19 (q, *J* = 276.3 Hz), 126.98, 122.81, 120.84, 112.49, 55.77, 33.57, 33.57 (q, *J* = 28.6 Hz), 24.13, 21.40 (q, *J* = 3.1 Hz).

**<sup>19</sup>F NMR** (376 MHz, CDCl<sub>3</sub>):  $\delta$  -66.89, -73.57 (**2-22b**).

**IR** (neat): 2957, 2925, 2854, 1763, 1502, 1466, 1458, 1260, 1136, 1112, 1028, 805.

**MS** (EI): *m/z* (%) 276 (M<sup>+</sup>, 2.97), 124 (100).

**HRMS** (ESI<sup>+</sup>): *m/z* calc'd for C<sub>13</sub>H<sub>15</sub>F<sub>3</sub>O<sub>3</sub>Na (M + Na)<sup>+</sup>: 299.0866, found 299.0871.

## 2-(methylthio)phenyl 6,6,6-trifluorohexanoate (2-23a, p5-165)

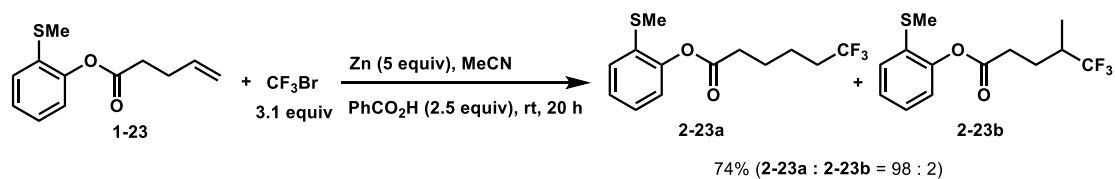

Prepared according to the general procedure using alkene **1-23** (222.3 mg, 1.0 mmol), CF<sub>3</sub>Br (3.1 mmol), Zn (327.0 mg, 5.0 mmol), PhCO<sub>2</sub>H (305.3 mg, 2.5 mmol) and MeCN (3 mL). After stirring for 20 h at rt, the reaction mixture was added sat. Na<sub>2</sub>CO<sub>3</sub> aq. (3 mL) for 15 min., and filtered through a pad of Celite eluting with DCM (30 mL) and concentrated. The residue was extracted with EtOAc (20 mL × 3), washed with sat. NaCl aq., dried over Na<sub>2</sub>SO<sub>4</sub>, and concentrated. The residue was purified by silica gel chromatography (petroleum ether : DCM = 3:1) to afford **2-23** (217.6 mg, 74% yield) as a light yellow oil. The ratio of **2-23a** and **2-23b** was calculated as 98:2 by <sup>1</sup>H NMR and <sup>19</sup>F NMR.

### 2-23a

**TLC:** *R<sub>f</sub>* = 0.33 in 10:1 petroleum ether/EtOAc.

**<sup>1</sup>H NMR** (400 MHz, CDCl<sub>3</sub>) δ 7.30–7.27 (m, 1H), 7.24–7.17 (m, 2H), 7.03 (dd, *J* = 7.8, 1.7 Hz, 1H), 2.66 (t, *J* = 7.3 Hz, 2H), 2.43 (s, 3H), 2.22–2.10 (m, 2H), 1.92–1.84 (m, 2H), 1.77–1.69 (m, 2H).

**<sup>13</sup>C NMR** (101 MHz, CDCl<sub>3</sub>) δ 170.98, 148.06, 131.48, 127.23, 127.11 (q, *J* = 276.2 Hz), 126.67, 125.99, 122.36, 33.54, 33.42 (q, *J* = 28.6 Hz), 23.87, 21.44 (q, *J* = 3.2 Hz), 15.09.

**<sup>19</sup>F NMR** (376 MHz, CDCl<sub>3</sub>): δ -66.85, -73.45 (**2-23b**).

**IR** (neat): 3068, 2928, 2879, 1763, 1470, 1258, 1201, 1140, 1109, 1071, 1031, 823, 747.

**MS** (ESI): *m/z* (%) 293 ((M + H)<sup>+</sup>, 5.90), 102 (100).

**HRMS** (ESI<sup>+</sup>): *m/z* calc'd for C<sub>13</sub>H<sub>15</sub>F<sub>3</sub>O<sub>2</sub>SNa (M + Na)<sup>+</sup>: 315.0637, found 315.0640.

## 2-oxo-2H-chromen-4-yl 6,6,6-trifluorohexanoate (2-24a, p5-62)

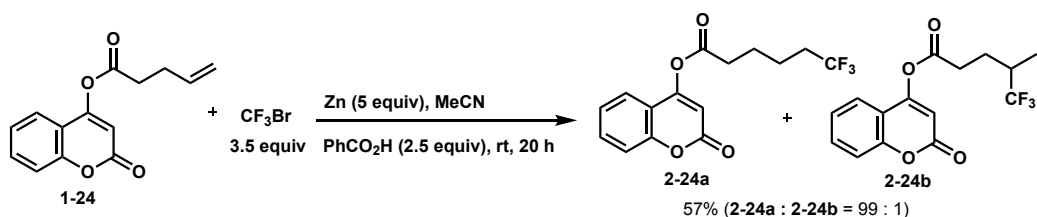

Prepared according to the general procedure using alkene **1-24** (215.5 mg, 0.88 mmol), CF<sub>3</sub>Br (3.5 mmol), Zn (288.6 mg, 4.4 mmol), PhCO<sub>2</sub>H (269.1 mg, 2.2 mmol) and MeCN (3 mL). After stirring for 20 h at rt, the reaction mixture was filtered through a pad of Celite eluting with EtOAc (30 mL) and concentrated. The residue was extracted with EtOAc (15 mL × 3), washed with sat. NaCl aq., dried over Na<sub>2</sub>SO<sub>4</sub>, and concentrated. The residue was purified by silica gel chromatography (petroleum ether : EtOAc = 15:1 (with 5% AcOH), 15:1 and 9:1)



to afford **2-24** (158.4 mg, 57% yield) as a white solid. The ratio of **2-24a** and **2-24b** was calculated as 99:1 by  $^1\text{H}$  NMR and  $^{19}\text{F}$  NMR.

#### **2-24a**

**TLC:**  $R_f$  = 0.66 in 2:1 petroleum ether/EtOAc.

**m.p.:** 65.6~66.2 °C.

$^1\text{H}$  NMR (400 MHz,  $\text{CDCl}_3$ )  $\delta$  7.62 – 7.57 (m, 2H), 7.39 – 7.37 (m, 1H), 7.33 – 7.29 (m, 1H), 6.53 (s, 1H), 2.76 (t,  $J$  = 7.3 Hz, 2H), 2.24 – 2.12 (m, 2H), 1.93 – 1.86 (m, 2H), 1.77 – 1.69 (m, 2H).

$^{13}\text{C}$  NMR (101 MHz,  $\text{CDCl}_3$ )  $\delta$  168.97, 161.48, 158.29, 153.69, 132.92, 126.98 (q,  $J$  = 276.2 Hz), 124.46, 122.68, 117.15, 115.42, 105.14, 34.08, 33.47 (q,  $J$  = 28.9 Hz), 23.64, 21.48 (q,  $J$  = 2.9 Hz).

$^{19}\text{F}$  NMR (376 MHz,  $\text{CDCl}_3$ ):  $\delta$  -66.79, -73.12 (**2-24b**).

**IR** (neat): 3087, 2959, 2881, 1772, 1733, 1718, 1633, 1377, 1264, 1247, 1207, 1157, 1119, 1105, 1082, 1024, 935, 836, 776, 756.

**MS** (ESI):  $m/z$  (%) 315 (( $\text{M} + \text{H}$ ) $^+$ , 11.47), 163 (100).

**HRMS** (ESI $^+$ ):  $m/z$  calc'd for  $\text{C}_{15}\text{H}_{13}\text{F}_3\text{O}_4\text{Na}$  ( $\text{M} + \text{Na}$ ) $^+$ : 337.0658, found 337.0659.

#### **(1R,2S,5R)-2-isopropyl-5-methylcyclohexyl 6,6,6-trifluorohexanoate (2-25, p5-63)**

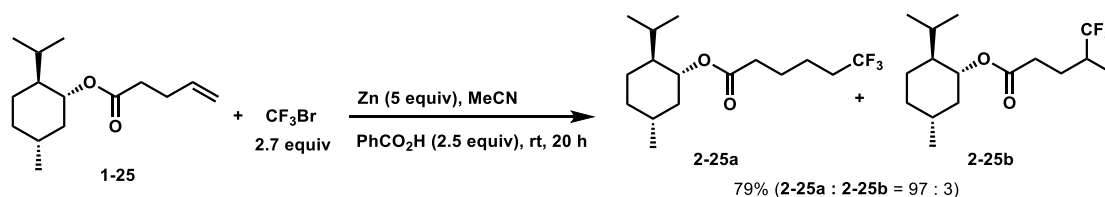

Prepared according to the general procedure using alkene **1-25** (272.8 mg, 1.14 mmol),  $\text{CF}_3\text{Br}$  (3.1 mmol),  $\text{Zn}$  (327.0 mg, 5.0 mmol),  $\text{PhCO}_2\text{H}$  (305.3 mg, 2.5 mmol) and  $\text{MeCN}$  (3 mL). After stirring for 20 h at rt, the reaction mixture was added sat.  $\text{KMnO}_4$  aq. (1 mL) for 15 min in an ice-bath and  $\text{Na}_2\text{CO}_3$  aq. (3 mL) for 15 min., and filtered through a pad of Celite eluting with DCM (30 mL) and concentrated. The residue was extracted with DCM (15 mL  $\times$  3), washed with sat.  $\text{NaCl}$  aq., dried over  $\text{Na}_2\text{SO}_4$ , and concentrated. The residue was purified by silica gel chromatography (petroleum ether : EtOAc = 50:1) to afford **2-25** (278.1 mg, 79% yield) as a light yellow oil. The ratio of **2-25a** and **2-25b** was calculated as 97:3 by  $^1\text{H}$  NMR and  $^{19}\text{F}$  NMR.

#### **2-25a**

**TLC:**  $R_f$  = 0.65 in 1:1 petroleum ether/EtOAc.

$^1\text{H}$  NMR (400 MHz,  $\text{CDCl}_3$ )  $\delta$  4.72–4.66 (m, 1H), 2.32 (t,  $J$  = 7.2 Hz, 2H), 2.16–2.04 (m, 2H), 2.00–1.95 (m, 1H), 1.88–1.80 (m, 1H), 1.75–1.57 (m, 6H), 1.53–1.43 (m, 1H), 1.40–1.33 (m, 1H), 1.08–0.94 (m, 2H), 0.90 (m, 6H), 0.76 (d,  $J$  = 7.0 Hz, 3H).

$^{13}\text{C}$  NMR (101 MHz,  $\text{CDCl}_3$ )  $\delta$  172.63, 127.12 (q,  $J = 276.3$  Hz), 74.31, 47.14, 41.04, 34.36, 34.22, 33.57 (q,  $J = 28.6$  Hz), 31.49, 26.42, 24.21, 23.52, 22.05, 21.53 (q,  $J = 3.1$  Hz), 20.78, 16.31.

$^{19}\text{F}$  NMR (376 MHz,  $\text{CDCl}_3$ ):  $\delta$  -66.95, -73.58 (**2-25b**).

IR (neat): 2959, 2873, 1734, 1458, 1389, 1371, 1256, 1179, 1138, 1115, 1033, 842.

MS (ESI):  $m/z$  (%) 309 ((M + H)<sup>+</sup>, 0.20), 102 (100).

HRMS (ESI<sup>+</sup>):  $m/z$  calc'd for  $\text{C}_{16}\text{H}_{27}\text{F}_3\text{O}_2\text{Na}$  (M + Na)<sup>+</sup>: 331.1855, found 331.1858.

**(8*R*,9*S*,13*S*,14*S*)-13-methyl-17-oxo-7,8,9,11,12,13,14,15,16,17-decahydro-6*H*-cyclopenta[*a*]phenanthren-3-yl 6,6,6-trifluorohexanoate (**2-26a**, p4-178)**

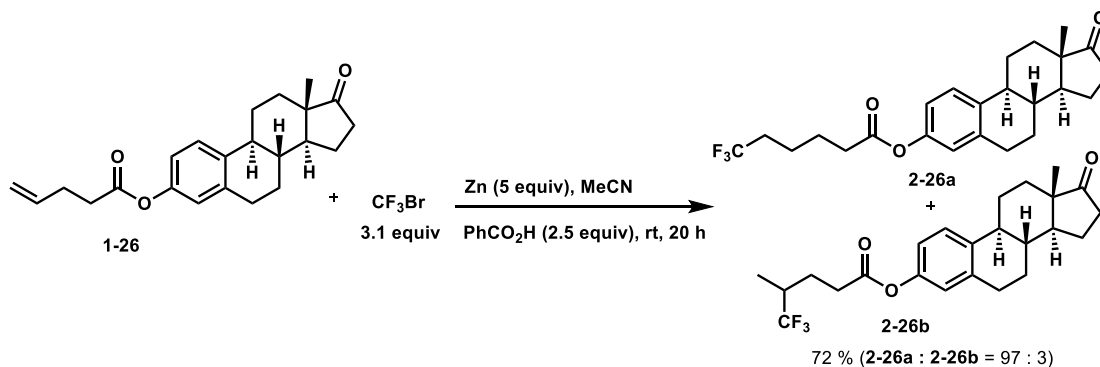

Prepared according to the general procedure using alkene **1-26** (350.0 mg, 1.0 mmol),  $\text{CF}_3\text{Br}$  (3.1 mmol), Zn (329.2 mg, 5.0 mmol),  $\text{PhCO}_2\text{H}$  (308.1 mg, 2.5 mmol) and MeCN (3 mL). After stirring for 20 h at rt, the reaction mixture was added sat.  $\text{KMnO}_4$  aq. (2 mL) for 15 min in an ice-bath and  $\text{Na}_2\text{CO}_3$  aq. (3 mL) for 15 min., and filtered through a pad of Celite eluting with EtOAc (30 mL) and concentrated. The residue was extracted with EtOAc (15 mL  $\times$  3), washed with sat. NaCl aq., dried over  $\text{Na}_2\text{SO}_4$ , and concentrated. The residue was purified by silica gel chromatography (petroleum ether : EtOAc = 10:1) to afford **2-26** (304.2 mg, 72% yield) as a white solid. The ratio of **2-26a** and **2-26b** was calculated as 97:3 by  $^1\text{H}$  NMR and  $^{19}\text{F}$  NMR.

**2-26a**

TLC:  $R_f$  = 0.41 in 5:1 petroleum ether/EtOAc.

m.p.: 83.7~85.1 °C.

$^1\text{H}$  NMR (400 MHz,  $\text{CDCl}_3$ )  $\delta$  7.29 (d,  $J = 8.6$  Hz, 1H), 6.84 (dd,  $J = 8.5, 2.6$  Hz, 1H), 6.80 (d,  $J = 2.5$  Hz, 1H), 2.93–2.90 (m, 2H), 2.59 (t,  $J = 7.3$  Hz, 2H), 2.55–2.48 (m, 1H), 2.44–2.38 (m, 1H), 2.32–2.26 (m, 1H), 2.21–1.93 (m, 6H), 1.87–1.80 (m, 2H), 1.73–1.40 (m, 8H), 0.91 (s, 3H).

$^{13}\text{C}$  NMR (101 MHz,  $\text{CDCl}_3$ )  $\delta$  220.73, 171.82, 148.54, 138.10, 137.49, 127.07 (q,  $J = 276.4$  Hz), 126.45, 121.54, 118.71, 50.48, 47.98, 44.20, 38.06, 35.88, 33.87, 33.51 (q,  $J = 28.4$  Hz), 31.61, 29.45, 26.38, 25.81, 24.00, 21.62, 21.50 (q,  $J = 3.0$  Hz), 13.86.

<sup>19</sup>F NMR (376 MHz, CDCl<sub>3</sub>): δ -66.86, -73.44 (**2-26b**).

IR (neat): 2956, 2882, 1759, 1735, 1494, 1383, 1321, 1269, 1249, 1224, 1198, 1151, 1087, 1029, 824.

MS (ESI): *m/z* (%) 423 ((M + H)<sup>+</sup>, 89.54), 280 (100).

HRMS (ESI<sup>+</sup>): *m/z* calc'd for C<sub>24</sub>H<sub>29</sub>F<sub>3</sub>O<sub>3</sub>Na (M + Na)<sup>+</sup>: 445.1961, found 445.1970.

**(3a*S*,6*R*,6a*S*)-5-((*S*)-2,2-dimethyl-1,3-dioxolan-4-yl)-2,2-dimethyltetrahydrofuro[2,3-*d*][1,3]dioxol-6-yl 6,6,6-trifluorohexanoate (**2-27a**, p5-84)**

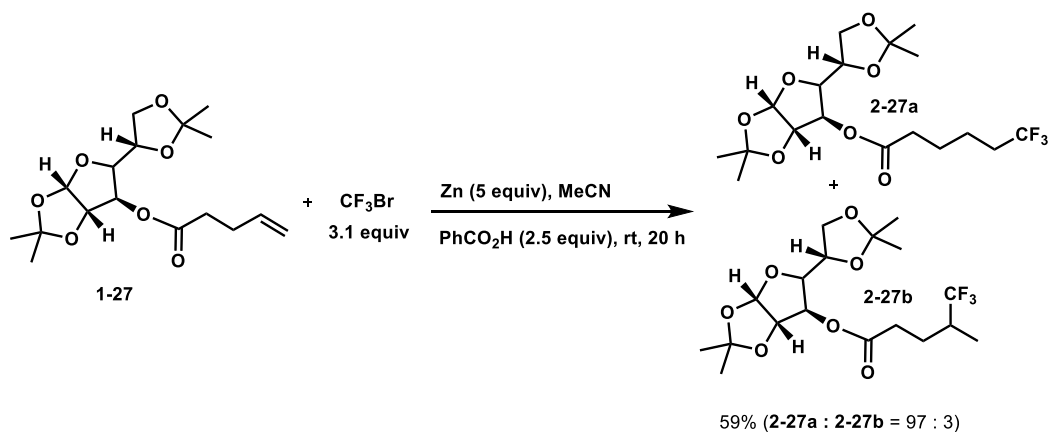

Prepared according to the general procedure using alkene **1-27** (342.4 mg, 1.0 mmol), CF<sub>3</sub>Br (3.1 mmol), Zn (327.0 mg, 5.0 mmol), PhCO<sub>2</sub>H (305.3 mg, 2.5 mmol) and MeCN (3 mL). After stirring for 20 h at rt, the reaction mixture was added sat. KMnO<sub>4</sub> aq. (1 mL) for 15 min in an ice-bath and Na<sub>2</sub>CO<sub>3</sub> aq. (3 mL) for 15 min., and filtered through a pad of Celite eluting with DCM (30 mL) and concentrated. The residue was extracted with EtOAc (15 mL × 3), washed with sat. NaCl aq., dried over Na<sub>2</sub>SO<sub>4</sub>, and concentrated. The residue was purified by silica gel chromatography (petroleum ether : EtOAc = 20:1 (5 % AcOH), 20:1 and 10:1, respectively) to afford a light yellow oil containing PhCO<sub>2</sub>H and AcOH. The product was dissolved in DCM (30 mL) and washed with Na<sub>2</sub>CO<sub>3</sub> aq. (0.5 M, 23 mL × 3). The DCM phase was washed with sat. NaCl aq. and dried over Na<sub>2</sub>SO<sub>4</sub>. Then solvent was removed to afford **2-27** (243.0 mg, 59% yield) as a light yellow oil. The ratio of **2-27a** and **2-27b** was calculated as 97:3 by <sup>1</sup>H NMR and <sup>19</sup>F NMR.

**2-27a**

TLC: R<sub>f</sub> = 0.37 in 10:1 petroleum ether/EtOAc.

<sup>1</sup>H NMR (400 MHz, CDCl<sub>3</sub>) δ 5.87 (d, *J* = 3.7 Hz, 1H), 5.28 (d, *J* = 2.1 Hz, 1H), 4.48 (d, *J* = 3.7 Hz, 1H), 4.21–4.16 (m, 2H), 4.11–4.07 (m, 1H), 4.04–4.00 (m, 1H), 2.45–2.32 (m, 2H), 2.16–2.04 (m, 2H), 1.77–1.68 (m, 2H), 1.66–1.58 (m, 2H), 1.52 (s, 3H), 1.41 (s, 3H), 1.31 (s, 6H).

<sup>13</sup>C NMR (101 MHz, CDCl<sub>3</sub>) δ 171.65, 127.06 (q, *J* = 276.2 Hz), 112.41, 109.49, 105.18, 83.50, 79.97, 76.18, 72.55, 67.45, 33.77, 33.51 (q, *J* = 28.6 Hz), 26.93, 26.81, 26.26, 25.25, 23.95, 21.46 (q, *J* = 3.3 Hz).

<sup>19</sup>F NMR (376 MHz, CDCl<sub>3</sub>): δ -66.85, -73.47 (**2-27b**).

IR (neat): 2990, 2941, 2881, 1749, 1458, 1384, 1375, 1259, 1219, 1165, 1138, 1114, 1078, 1026, 847.

MS (ESI): *m/z* (%) 413 ((M + H)<sup>+</sup>, 0.21), 102 (100).

HRMS (ESI<sup>+</sup>): *m/z* calc'd for C<sub>18</sub>H<sub>28</sub>F<sub>3</sub>O<sub>7</sub> (M + H)<sup>+</sup>: 413.1782, found 413.1775.

### 6,6,6-trifluorohexyl acetate (**2-28a**, p5-68)

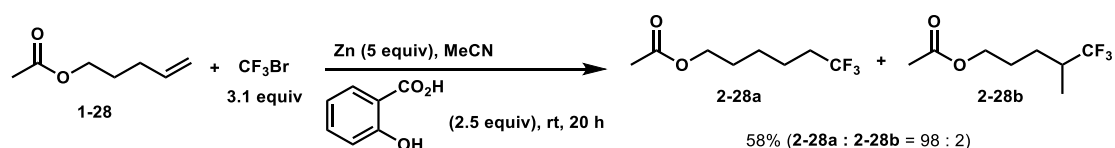

Prepared according to the general procedure using alkene **1-28** (143 μL, *d* = 0.911 g/mL, 1.0 mmol), CF<sub>3</sub>Br (3.1 mmol), Zn (327.0 mg, 5.0 mmol), salicylic acid (345.3 mg, 2.5 mmol) and MeCN (3 mL). After stirring for 20 h at rt, the reaction mixture was extracted with pentane (20 mL × 4) and the organic phase was concentrated. The residue was dissolved in MeCN (3 mL), added sat. KMnO<sub>4</sub> aq. (2 mL) for 15 min in an ice-bath and Na<sub>2</sub>CO<sub>3</sub> aq. (3 mL) for 15 min. respectively. The resulting solution was washed with sat. NaCl aq., dried over Na<sub>2</sub>SO<sub>4</sub>, and concentrated. The residue was purified by silica gel chromatography (pentane) to afford **2-28** (115.2 mg, 58% yield) as a colorless oil. The ratio of **2-28a** and **2-28b** was calculated as 98:2 by <sup>1</sup>H NMR and <sup>19</sup>F NMR.

#### **2-28a**

TLC: *R<sub>f</sub>* = 0.45 in 1:1 petroleum ether/DCM.

<sup>1</sup>H NMR (400 MHz, CDCl<sub>3</sub>) δ 4.07 (t, *J* = 6.5 Hz, 2H), 2.15–2.03 (m, 4H), 1.70–1.56 (m, 5H), 1.48–1.42 (m, 2H).

<sup>13</sup>C NMR (101 MHz, CDCl<sub>3</sub>) δ 171.17, 127.22 (q, *J* = 276.3 Hz), 64.12, 33.67 (q, *J* = 28.6 Hz), 28.31, 25.25, 21.67 (q, *J* = 2.9 Hz), 20.92.

<sup>19</sup>F NMR (376 MHz, CDCl<sub>3</sub>): δ -66.92, -73.78 (**2-28b**).

IR (neat): 2956, 2928, 2857, 1744, 1391, 1369, 1246, 1144, 1044, 856.

MS (EI): *m/z* (%) 198 (M<sup>+</sup>, 0.01), 43 (100).

HRMS (ESI<sup>+</sup>): *m/z* calc'd for C<sub>8</sub>H<sub>13</sub>F<sub>3</sub>O<sub>2</sub>Na (M + Na)<sup>+</sup>: 221.0760, found 221.0757.

### 5,5,5-trifluoropentyl [1,1'-biphenyl]-4-carboxylate (**2-29**, p5-93)

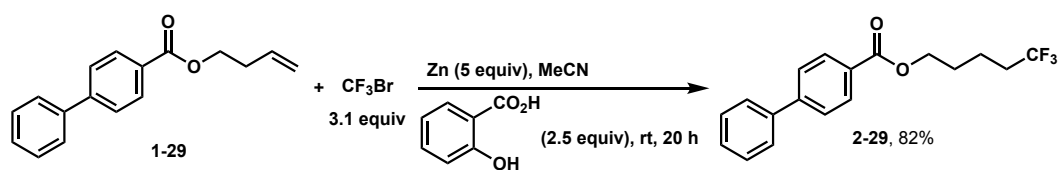

Prepared according to the general procedure using alkene **1-29** (252.3 mg, 1.0 mmol),  $\text{CF}_3\text{Br}$  (3.1 mmol),  $\text{Zn}$  (327.0 mg, 5.0 mmol), salicylic acid (345.3 mg, 2.5 mmol) and MeCN (3 mL). After stirring for 20 h at rt, the reaction mixture was added sat.  $\text{Na}_2\text{CO}_3$  aq. (3 mL) for 15 min., and filtered through a pad of Celite eluting with DCM (30 mL). The resulting solution was concentrated, and the residue was dissolved in MeCN (5 mL), and added sat.  $\text{KMnO}_4$  aq. (1 mL) for 15 min in an ice-bath. The resulting solution was filtered through a pad of Celite eluting with DCM (30 mL) and concentrated. The residue was extracted with DCM (20 mL  $\times$  3), washed with sat.  $\text{NaCl}$  aq., dried over  $\text{Na}_2\text{SO}_4$ , and concentrated. The residue was purified by silica gel chromatography (petroleum ether) to afford **2-29** (263.9 mg, 82% yield) as a white solid.

**TLC:**  $R_f$  = 0.56 in 10:1 petroleum ether/EtOAc.

**m.p.:** 56.4~59.1 °C.

**$^1\text{H}$  NMR** (400 MHz,  $\text{CDCl}_3$ )  $\delta$  8.11–8.09 (m, 2H), 7.68–7.62 (m, 2H), 7.63 (dd,  $J$  = 7.5, 1.8 Hz, 2H), 7.49–7.46 (m, 2H), 7.42–7.38 (m, 1H), 4.37 (t,  $J$  = 6.3 Hz, 2H), 2.25–2.13 (m, 2H), 1.92–1.85 (m, 2H), 1.80–1.73 (m, 2H).

**$^{13}\text{C}$  NMR** (101 MHz,  $\text{CDCl}_3$ )  $\delta$  166.53, 145.88, 140.09, 130.19, 129.06, 129.01, 128.30, 127.39, 127.21, 127.16 (q,  $J$  = 276.1 Hz), 64.26, 33.53 (q,  $J$  = 28.6 Hz), 28.00, 18.95 (q,  $J$  = 3.0 Hz).

**$^{19}\text{F}$  NMR** (376 MHz,  $\text{CDCl}_3$ ):  $\delta$  -66.86.

**IR** (neat): 2959, 2926, 2861, 1709, 1610, 1469, 1407, 1295, 1278, 1255, 1072, 1041, 752, 698.

**MS** (ED):  $m/z$  (%) 322 ( $\text{M}^+$ , 7.21), 152 (100).

**HRMS** (ESI $^+$ ):  $m/z$  calc'd for  $\text{C}_{18}\text{H}_{17}\text{F}_3\text{O}_2\text{Na}$  ( $\text{M} + \text{Na}$ ) $^+$ : 345.1073, found 345.1075.

### 3,3,3-trifluoropropyl pivalate (**2-30**, p5-119)

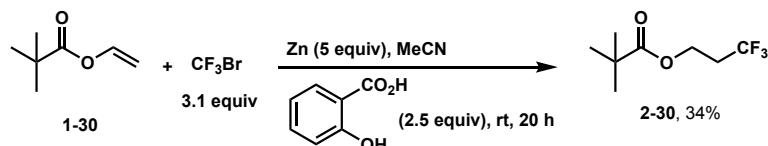

Prepared according to the general procedure using alkene **1-30** (147  $\mu\text{L}$ ,  $d$  = 0.866 g/mL, 1.0 mmol),  $\text{CF}_3\text{Br}$  (3.1 mmol),  $\text{Zn}$  (327.0 mg, 5.0 mmol), salicylic acid (345.3 mg, 2.5 mmol) and MeCN (3 mL). After stirring for 20 h at rt, the reaction mixture was added sat.  $\text{Na}_2\text{CO}_3$  aq. (3 mL) for 15 min., and filtered through a pad of Celite eluting with pentane (30 mL). The

resulting solution was concentrated, and the residue was dissolved in MeCN (3 mL), and added sat. KMnO<sub>4</sub> aq. (1 mL) for 15 min in an ice-bath. The resulting solution was filtered through a pad of Celite eluting with pentane (30 mL) and concentrated. The residue was extracted with pentane (20 mL × 3), washed with sat. NaCl aq., dried over Na<sub>2</sub>SO<sub>4</sub>, and concentrated. The residue was purified by silica gel chromatography (pentane) to afford **2-30** (66.6 mg, 34% yield) as a colorless oil.

**TLC:**  $R_f$  = 0.70 in 10:1 petroleum ether/EtOAc.

**<sup>1</sup>H NMR** (400 MHz, CDCl<sub>3</sub>)  $\delta$  4.30–4.27 (m, 2H), 2.52–2.41 (m, 2H), 1.20 (s, 9H).

**<sup>13</sup>C NMR** (101 MHz, CDCl<sub>3</sub>)  $\delta$  178.27, 126.00 (q,  $J$  = 276.7 Hz), 57.26 (q,  $J$  = 3.6 Hz), 38.81, 33.51 (q,  $J$  = 29.1 Hz), 27.14.

**<sup>19</sup>F NMR** (376 MHz, CDCl<sub>3</sub>):  $\delta$  -65.47.

**IR** (neat): 2959, 2922, 2850, 1739, 1662, 1635, 1469, 1378, 1300, 1261, 804.

**MS** (ED):  $m/z$  (%) 198 (M<sup>+</sup>, 1.03), 57 (100).

**HRMS** (ESI<sup>+</sup>):  $m/z$  calc'd for C<sub>8</sub>H<sub>14</sub>F<sub>3</sub>O<sub>2</sub> (M + H)<sup>+</sup>: 199.0940, found 199.0940.

### 3,3,3-trifluoropropyl hexanoate (**2-31**, p5-113)

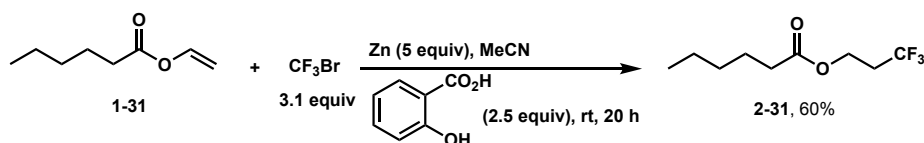

Prepared according to the general procedure using alkene **1-31** (160  $\mu$ L,  $d$  = 0.887 g/mL, 1.0 mmol), CF<sub>3</sub>Br (3.1 mmol), Zn (327.0 mg, 5.0 mmol), salicylic acid (345.3 mg, 2.5 mmol) and MeCN (3 mL). After stirring for 20 h at rt, the reaction mixture was added sat. Na<sub>2</sub>CO<sub>3</sub> aq. (3 mL) for 15 min., and filtered through a pad of Celite eluting with pentane (30 mL). The resulting solution was concentrated, and the residue was dissolved in MeCN (5 mL), and added sat. KMnO<sub>4</sub> aq. (1 mL) for 15 min in an ice-bath. The resulting solution was extracted with pentane (20 mL × 3), washed with sat. NaCl aq., dried over Na<sub>2</sub>SO<sub>4</sub>, and concentrated. The residue was purified by silica gel chromatography (pentane) to afford **2-31** (127.4 mg, 60% yield) as a colorless oil.

**TLC:**  $R_f$  = 0.60 in 1:1 petroleum ether/DCM.

**<sup>1</sup>H NMR** (400 MHz, CDCl<sub>3</sub>)  $\delta$  4.30 (t,  $J$  = 6.4 Hz, 2H), 2.52–2.41 (m, 2H), 2.32 (t,  $J$  = 7.5 Hz, 2H), 1.67–1.59 (m, 2H), 1.35–1.26 (m, 4H), 0.90 (t,  $J$  = 6.7 Hz, 3H).

**<sup>13</sup>C NMR** (101 MHz, CDCl<sub>3</sub>)  $\delta$  173.54, 125.92 (q,  $J$  = 276.6 Hz), 57.07 (q,  $J$  = 3.5 Hz), 34.17, 33.54 (q,  $J$  = 29.2 Hz), 31.37, 24.62, 22.41, 13.97.

**<sup>19</sup>F NMR** (376 MHz, CDCl<sub>3</sub>):  $\delta$  -65.54.

**IR** (neat): 2964, 2936, 2865, 1745, 1388, 1348, 1297, 1260, 1158, 1010, 842.

**MS** (ED):  $m/z$  (%) 212 (M<sup>+</sup>, 0.64), 43 (100).

HRMS (ESI<sup>+</sup>): *m/z* calc'd for C<sub>9</sub>H<sub>16</sub>F<sub>3</sub>O<sub>2</sub> (M + H)<sup>+</sup>: 213.1097, found 213.1095.

### 1-(3,3,3-trifluoropropyl)pyrrolidin-2-one (2-32, p5-97)

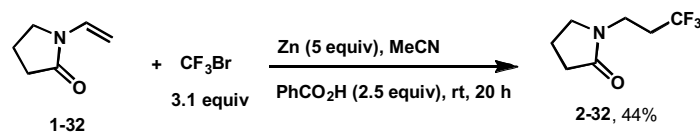

Prepared according to the general procedure using alkene **1-32** (107  $\mu$ L,  $d = 1.04$  g/mL, 1.0 mmol), CF<sub>3</sub>Br (3.1 mmol), Zn (327.0 mg, 5.0 mmol), PhCO<sub>2</sub>H (305.3 mg, 2.5 mmol) and MeCN (3 mL). After stirring for 20 h at rt, the reaction mixture was added sat. Na<sub>2</sub>CO<sub>3</sub> aq. (3 mL) for 15 min., and filtered through a pad of Celite eluting with DCM (30 mL). The resulting solution was concentrated, and the residue was extracted with DCM (20 mL  $\times$  3), washed with sat. NaCl aq., dried over Na<sub>2</sub>SO<sub>4</sub>, and concentrated. The residue was purified by silica gel chromatography (petroleum ether/EtOAc = 10:1 (5% AcOH), 10:1 and 1:2, respectively) to afford **2-32** (80.5 mg, 44% yield) as a light yellow oil.

TLC:  $R_f = 0.31$  in 5:1 petroleum ether/EtOAc.

<sup>1</sup>H NMR (400 MHz, CDCl<sub>3</sub>)  $\delta$  3.56–3.51 (m, 2H), 3.46–3.42 (m, 2H), 2.45–2.31 (m, 4H), 2.11–2.02 (m, 2H).

<sup>13</sup>C NMR (101 MHz, CDCl<sub>3</sub>)  $\delta$  175.30, 126.10 (q,  $J = 276.8$  Hz), 47.47, 36.31 (q,  $J = 3.9$  Hz), 31.68 (q,  $J = 28.3$  Hz), 30.70, 18.05.

<sup>19</sup>F NMR (376 MHz, CDCl<sub>3</sub>):  $\delta$  -65.96.

IR (neat): 2957, 2938, 2889, 1691, 1255, 1216, 1145, 975, 857.

MS (EI): *m/z* (%) 181 (M<sup>+</sup>, 59.76), 98 (100).

HRMS (ESI<sup>+</sup>): *m/z* calc'd for C<sub>7</sub>H<sub>10</sub>F<sub>3</sub>NONa (M + Na)<sup>+</sup>: 204.0607, found 204.0605

### ((5,5,5-trifluoropentyl)sulfonyl)benzene (2-33a, p6-3)

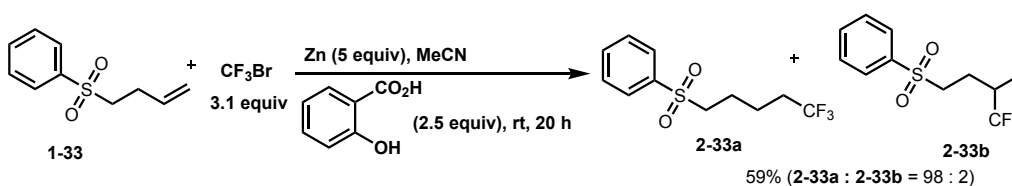

Prepared according to the general procedure using alkene **1-33** (196.3 mg, 1.0 mmol), CF<sub>3</sub>Br (3.1 mmol), Zn (327.0 mg, 5.0 mmol), salicylic acid (345.3 mg, 2.5 mmol) and MeCN (3 mL). After stirring for 20 h at rt, the reaction mixture was added sat. Na<sub>2</sub>CO<sub>3</sub> aq. (3 mL) for 15 min., and filtered through a pad of Celite eluting with DCM (30 mL) and concentrated. The residue was extracted with DCM (20 mL  $\times$  3), washed with sat. NaCl aq., dried over Na<sub>2</sub>SO<sub>4</sub>, and concentrated. The residue was dissolved in MeCN (3 mL) and added sat. KMnO<sub>4</sub> aq. (3 mL) for 15 min in an ice-bath. The reaction mixture was filtered through a pad of Celite eluting with DCM (30 mL) and concentrated. The residue was extracted with DCM (20 mL

× 3), washed with sat. NaCl aq., dried over Na<sub>2</sub>SO<sub>4</sub>, and concentrated. The residue was purified by silica gel chromatography (petroleum ether:DCM = 1:2) to afford **2-33** (158.0 mg, 59% yield) as a light yellow solid. The ratio of **2-33a** and **2-33b** was calculated as 98:2 by <sup>1</sup>H NMR and <sup>19</sup>F NMR.

### 2-33a

**TLC:** R<sub>f</sub> = 0.29 in 1:3 petroleum ether/DCM.

**m.p.:** 48.0~49.3 °C.

**<sup>1</sup>H NMR** (400 MHz, CDCl<sub>3</sub>) δ 7.91 (d, *J* = 7.7 Hz, 2H), 7.68 (t, *J* = 7.5 Hz, 1H), 7.58 (t, *J* = 7.6 Hz, 2H), 3.11 (t, *J* = 7.8 Hz, 2H), 2.14–2.02 (m, 2H), 1.86–1.78 (m, 2H), 1.70–1.62 (m, 2H).

**<sup>13</sup>C NMR** (101 MHz, CDCl<sub>3</sub>) δ 139.01, 133.96, 129.48, 128.09, 126.77 (q, *J* = 276.4 Hz), 55.78, 33.30 (q, *J* = 28.8 Hz), 21.96, 20.91 (q, *J* = 3.2 Hz).

**<sup>19</sup>F NMR** (376 MHz, CDCl<sub>3</sub>): δ -66.79, -73.34 (**2-33b**).

**IR** (neat): 3062, 2994, 2932, 2877, 1729, 1470, 1448, 1410, 1365, 1320, 1288, 1262, 1233, 1150, 1084, 1058, 1017, 929, 890, 836, 723, 689, 657, 606, 529.

**MS** (ESI): *m/z* (%) 267 ((M + H)<sup>+</sup>, 81.42), 102 (100).

**HRMS** (ESI<sup>+</sup>): *m/z* calc'd for C<sub>11</sub>H<sub>13</sub>F<sub>3</sub>O<sub>2</sub>SNa (M + Na)<sup>+</sup>: 289.0481, found 289.0482.

### 5,5,5-trifluoropentyl 4-methylbenzenesulfonate (**2-34**, p5-162)

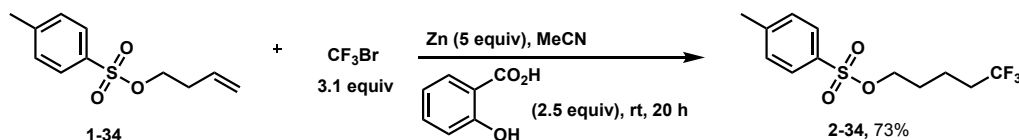

Prepared according to the general procedure using alkene **1-34** (226.3 mg, 1.0 mmol), CF<sub>3</sub>Br (3.1 mmol), Zn (327.0 mg, 5.0 mmol), salicylic acid (345.3 mg, 2.5 mmol) and MeCN (3 mL). After stirring for 20 h at rt, the reaction mixture was added sat. Na<sub>2</sub>CO<sub>3</sub> aq. (3 mL) for 15 min., and filtered through a pad of Celite eluting with EtOAc (30 mL) and concentrated. The residue was extracted with EtOAc (20 mL × 3), washed with sat. NaCl aq., dried over Na<sub>2</sub>SO<sub>4</sub>, and concentrated. The residue was purified by silica gel chromatography (petroleum ether : EtOAc = 20:1) to afford **2-34** (216.1 mg, 73% yield) as a light yellow oil. The regio-selectivity is more than 99:1 if 2-CF<sub>3</sub> product was existed based on <sup>19</sup>F NMR.

### 2-34<sup>11</sup>

**TLC:** R<sub>f</sub> = 0.31 in 10:1 petroleum ether/EtOAc.

**<sup>1</sup>H NMR** (400 MHz, CDCl<sub>3</sub>) δ 7.80–7.78 (m, 2H), 7.37–7.35 (m, 2H), 4.05 (t, *J* = 6.1 Hz, 2H), 2.46 (s, 3H), 2.10–1.97 (m, 2H), 1.77–1.70 (m, 2H), 1.64–1.56 (m, 2H).

**<sup>13</sup>C NMR** (101 MHz, CDCl<sub>3</sub>) δ 145.12, 133.01, 130.04, 127.97, 126.96 (q, *J* = 276.3 Hz), 69.68, 33.10 (q, *J* = 28.9 Hz) 27.95, 21.68, 18.34 (q, *J* = 3.2 Hz).

**<sup>19</sup>F NMR** (376 MHz, CDCl<sub>3</sub>): δ -66.90.



**MS** (ESI):  $m/z$  (%) 297 ((M + H)<sup>+</sup>, 0.20), 274 (100).

#### benzyl 4,4,4-trifluorobutanoate (2-35, p4-94)

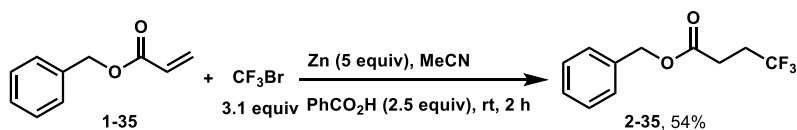

Prepared according to the general procedure using alkene **1-35** (150  $\mu$ L,  $d = 1.08$  g/mL, 1.0 mmol), CF<sub>3</sub>Br (3.1 mmol), Zn (327.0 mg, 5.0 mmol), PhCO<sub>2</sub>H (305.3 mg, 2.5 mmol) and MeCN (3 mL). After stirring for 2 h at rt, the reaction mixture was added basic KMnO<sub>4</sub> aq. (1 mL) for 15 min in an ice-bath and Na<sub>2</sub>CO<sub>3</sub> aq. (3 mL) for 15 min, then filtered through a pad of Celite eluenting with DCM (30 mL). Then solution dissolved in DCM (40 mL), washed with H<sub>2</sub>O (10 mL) containing Na<sub>2</sub>CO<sub>3</sub> aq. (2 mL) 3 times, washed with sat. NaCl aq., and dried over Na<sub>2</sub>SO<sub>4</sub>. The residue was purified by silica gel chromatography (pentane : DCM = 4:1) to afford **2-35** (126.0 mg, 54% yield) as a light yellow oil.

**TLC**:  $R_f = 0.56$  in 10:1 petroleum ether/EtOAc.

**<sup>1</sup>H NMR** (400 MHz, CDCl<sub>3</sub>)  $\delta$  7.40–7.33 (m, 5H), 5.15 (s, 2H), 2.65–2.62 (m, 2H), 2.54–2.42 (m, 2H).

**<sup>13</sup>C NMR** (101 MHz, CDCl<sub>3</sub>)  $\delta$  170.88, 135.60, 128.76, 128.59, 128.45, 126.59 (q,  $J = 275.7$  Hz), 67.04, 29.45 (q,  $J = 30.1$  Hz), 27.26 (q,  $J = 3.2$  Hz).

**<sup>19</sup>F NMR** (376 MHz, CDCl<sub>3</sub>):  $\delta$  -67.54.

**IR** (neat): 3037, 2965, 2936, 2854, 1744, 1446, 1378, 1330, 1264, 1230, 1187, 1142, 1111, 985, 752, 698.

**MS** (EI):  $m/z$  (%) 232 (M<sup>+</sup>, 22.07), 108 (100).

**HRMS** (ESI<sup>+</sup>):  $m/z$  calc'd for C<sub>11</sub>H<sub>11</sub>F<sub>3</sub>O<sub>2</sub>Na (M + Na)<sup>+</sup>: 255.0603, found 255.0606.

#### 4,4,4-trifluorobutanamide (2-36, p5-146)

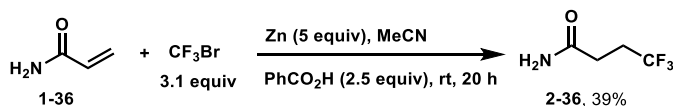

Prepared according to the general procedure using alkene **1-36** (71.1 mg, 1.0 mmol), CF<sub>3</sub>Br (3.1 mmol), Zn (327.0 mg, 5.0 mmol), PhCO<sub>2</sub>H (305.3 mg, 2.5 mmol) and MeCN (3 mL). After stirring for 20 h at rt, the reaction mixture was added sat. Na<sub>2</sub>CO<sub>3</sub> aq. (3 mL) for 15 min., and filtered through a pad of Celite eluenting with EtOAc (30 mL). The resulting solution was concentrated, and the residue was extracted with EtOAc (20 mL  $\times$  3), washed with sat. NaCl aq., dried over Na<sub>2</sub>SO<sub>4</sub>, and concentrated. The residue was purified by silica gel chromatography (petroleum ether/EtOAc = 10:1 (5% AcOH), 2:1 and 1:3, respectively) to afford **2-36** (54.7 mg, 39% yield) as a white solid.

**TLC:**  $R_f$  = 0.75 in 1:5 petroleum ether/EtOAc.

**m.p.:** 135.5~136.9 °C.

**$^1\text{H}$  NMR** (400 MHz,  $\text{DMSO-}d_6$ )  $\delta$  7.43 (s, 1H), 6.94 (s, 1H), 2.48–2.40 (m, 2H), 2.31 (t,  $J$  = 7.6 Hz, 2H).

**$^{13}\text{C}$  NMR** (101 MHz,  $\text{DMSO-}d_6$ )  $\delta$  171.24, 127.51 (q,  $J$  = 276.0 Hz), 28.53 (q,  $J$  = 28.5 Hz), 27.29 (q,  $J$  = 2.7, 2.3 Hz).

**$^{19}\text{F}$  NMR** (376 MHz,  $\text{DMSO-}d_6$ ):  $\delta$  -64.79.

**IR** (neat): 3373, 3204, 2964, 2927, 2855, 1666, 1636, 1447, 1379, 1316, 1291, 1252, 1231, 1148, 1106, 984, 701, 589, 481.

**MS** (ESI):  $m/z$  (%) 142 ((M + H)<sup>+</sup>, 142 (100) ).

**HRMS** (ESI<sup>+</sup>):  $m/z$  calc'd for  $\text{C}_4\text{H}_7\text{F}_3\text{NO}$  (M + H)<sup>+</sup>: 142.0474, found 142.0474.

### 1-(5-bromo-1*H*-indol-1-yl)-6,6,6-trifluorohexan-1-one (2-37, p5-179)

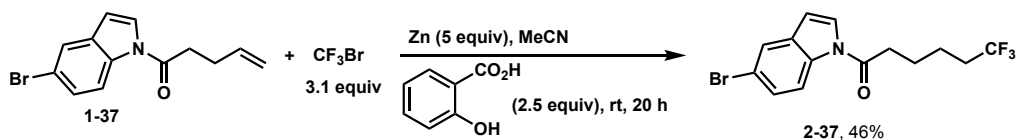

Prepared according to the general procedure using alkene **1-37** (278.2 mg, 1.0 mmol),  $\text{CF}_3\text{Br}$  (3.1 mmol),  $\text{Zn}$  (327.0 mg, 5.0 mmol), salicylic acid (345.3 mg, 2.5 mmol) and  $\text{MeCN}$  (3 mL). After stirring for 20 h at rt, the reaction mixture was added sat.  $\text{Na}_2\text{CO}_3$  aq. (3 mL) for 15 min., and filtered through a pad of Celite eluting with EtOAc (30 mL) and concentrated. The residue was extracted with DCM (20 mL  $\times$  3), washed with sat.  $\text{NaCl}$  aq., dried over  $\text{Na}_2\text{SO}_4$ , and concentrated. The residue was purified by silica gel chromatography (petroleum ether : EtOAc = 25:1 to 20:1) to afford **2-37** (159.0 mg, 46% yield) as a light yellow solid.

**TLC:**  $R_f$  = 0.33 in 10:1 petroleum ether/EtOAc.

**m.p.:** 74.1~75.3 °C.

**$^1\text{H}$  NMR** (400 MHz,  $\text{CDCl}_3$ )  $\delta$  8.34 (d,  $J$  = 8.8 Hz, 1H), 7.70 (d,  $J$  = 1.9 Hz, 1H), 7.46–7.44 (m, 2H), 6.59 (d,  $J$  = 3.8 Hz, 1H), 2.95 (t,  $J$  = 7.2 Hz, 2H), 2.24–2.12 (m, 2H), 1.97–1.89 (m, 2H), 1.77–1.69 (m, 2H).

**$^{13}\text{C}$  NMR** (101 MHz,  $\text{CDCl}_3$ )  $\delta$  170.58, 134.44, 132.15, 128.14, 127.09 (q,  $J$  = 276.3 Hz), 125.52, 123.66, 118.10, 117.12, 108.56, 35.24, 33.75 (q,  $J$  = 28.8 Hz), 23.51, 21.71 (q,  $J$  = 3.0 Hz).

**$^{19}\text{F}$  NMR** (376 MHz,  $\text{CDCl}_3$ ):  $\delta$  -66.82.

**IR** (neat): 3116, 2953, 2925, 2875, 1704, 1535, 1467, 1445, 1395, 1390, 1309, 1274, 1261, 1245, 1201, 1132, 1114, 1040, 1029, 934, 874, 821, 778, 762, 736, 716.

**MS** (ESI):  $m/z$  (%) 347 ((M + H)<sup>+</sup> ( $^{79}\text{Br}$ ), 0.21), 349 ((M + H)<sup>+</sup> ( $^{81}\text{Br}$ ), 7.21), 102 (100).

**HRMS** (ESI<sup>+</sup>):  $m/z$  calc'd for  $\text{C}_{14}\text{H}_{14}\text{BrF}_3\text{NO}$  [M + H]<sup>+</sup>: 348.0205 ( $^{79}\text{Br}$ ), found 348.0204; 350.0184 ( $^{81}\text{Br}$ ), found 350.0186.

### *N*-(butoxymethyl)-4,4,4-trifluorobutanamide (**2-38**, p5-139)

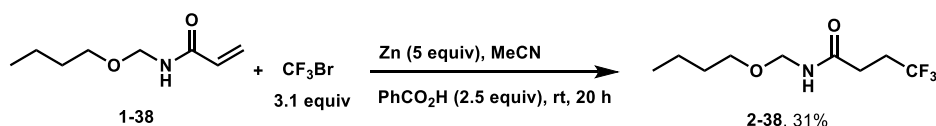

Prepared according to the general procedure using alkene **1-38** (162  $\mu\text{L}$ ,  $d = 0.96 \text{ g/mL}$ , 1.0 mmol),  $\text{CF}_3\text{Br}$  (3.1 mmol), Zn (327.0 mg, 5.0 mmol),  $\text{PhCO}_2\text{H}$  (305.3 mg, 2.5 mmol) and MeCN (3 mL). After stirring for 20 h at rt, the reaction mixture was added sat.  $\text{Na}_2\text{CO}_3$  aq. (3 mL) for 15 min., and filtered through a pad of Celite eluting with DCM (30 mL). The resulting solution was concentrated, and the residue was extracted with DCM (20 mL  $\times$  3), washed with sat. NaCl aq., dried over  $\text{Na}_2\text{SO}_4$ , and concentrated. The residue was purified by silica gel chromatography (petroleum ether/EtOAc = 10:1 (5% AcOH), 10:1 and 2:1, respectively) to afford **2-38** (71.3 mg, 31% yield) as a light yellow oil.

**TLC:**  $R_f = 0.62$  in 1:1 petroleum ether/EtOAc.

**$^1\text{H}$  NMR** (400 MHz,  $\text{CDCl}_3$ )  $\delta$  6.08 (s, 1H), 4.74 (d,  $J = 6.7 \text{ Hz}$ , 2H), 3.48 (t,  $J = 6.7 \text{ Hz}$ , 2H), 2.54–2.47 (m, 4H), 1.58–1.51 (m, 2H), 1.40–1.31 (m, 2H), 0.91 (t,  $J = 7.4 \text{ Hz}$ , 3H).

**$^{13}\text{C}$  NMR** (101 MHz,  $\text{CDCl}_3$ )  $\delta$  170.63, 126.85 (q,  $J = 276.0 \text{ Hz}$ ), 70.32, 68.71, 31.75, 29.44 (q,  $J = 30.1 \text{ Hz}$ ), 28.92 (q,  $J = 2.9 \text{ Hz}$ ), 19.35, 13.93.

**$^{19}\text{F}$  NMR** (376 MHz,  $\text{CDCl}_3$ ):  $\delta$  -67.33.

**IR** (neat): 3319, 3079, 2962, 2936, 2876, 1670, 1551, 1449, 1341, 1264, 1142, 1110, 1085, 981, 803.

**MS** (ESI):  $m/z$  (%) 228 ((M + H)<sup>+</sup>, 0.36), 102 (100).

**HRMS** (ESI<sup>+</sup>):  $m/z$  calc'd for  $\text{C}_9\text{H}_{16}\text{F}_3\text{NO}_2\text{Na}$  (M + Na)<sup>+</sup>: 250.1025, found 250.1026.

### 4,4,4-trifluoro-1-morpholinobutan-1-one (**2-39**, p5-76)

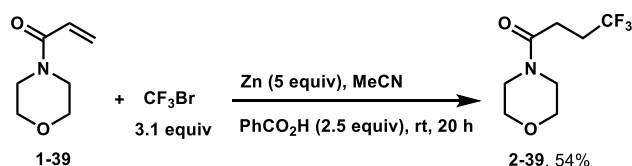

Prepared according to the general procedure using alkene **1-39** (143  $\mu\text{L}$ ,  $d = 1.122 \text{ g/mL}$ , 1.0 mmol),  $\text{CF}_3\text{Br}$  (3.1 mmol), Zn (327.0 mg, 5.0 mmol),  $\text{PhCO}_2\text{H}$  (305.3 mg, 2.5 mmol) and MeCN (3 mL). After stirring for 20 h at rt, the reaction mixture was added sat.  $\text{Na}_2\text{CO}_3$  aq. (3 mL) for 15 min., and filtered through a pad of Celite eluting with DCM (30 mL). The resulting solution was concentrated, and the residue was extracted with DCM (15 mL  $\times$  3), washed with sat. NaCl aq., dried over  $\text{Na}_2\text{SO}_4$ , and concentrated. The residue was purified by silica gel chromatography (petroleum ether/EtOAc = 10:1 (5% AcOH), 10:1 and 1:1, respectively) to afford **2-39** (114.0 mg, 54% yield) as a light yellow oil.

**TLC:**  $R_f = 0.33$  in 1:1 petroleum ether/EtOAc.

$^1\text{H NMR}$  (400 MHz,  $\text{CDCl}_3$ )  $\delta$  3.71–3.62 (m, 6H), 3.48–3.46 (m, 2H), 2.59–2.46 (m, 4H).

$^{13}\text{C NMR}$  (101 MHz,  $\text{CDCl}_3$ )  $\delta$  168.37, 127.04 (q,  $J = 275.9$  Hz), 66.74, 66.41, 45.69, 42.16, 29.44 (q,  $J = 29.4$  Hz), 25.69 (q,  $J = 3.4$  Hz).

$^{19}\text{F NMR}$  (376 MHz,  $\text{CDCl}_3$ ):  $\delta$  -67.14.

**IR** (neat): 2962, 2923, 2862, 1648, 1466, 1459, 1399, 1315, 1259, 1229, 1136, 1112, 978, 860, 841.

**MS** (EI):  $m/z$  (%) 211 ( $\text{M}^+$ , 0.59), 68 (100).

**HRMS** (EI):  $m/z$  calc'd for  $\text{C}_8\text{H}_{12}\text{F}_3\text{NO}_2$   $\text{M}^+$ : 211.0815, found 211.0814.

### triphenyl(3,3,3-trifluoropropyl)silane (2-40, p5-191)

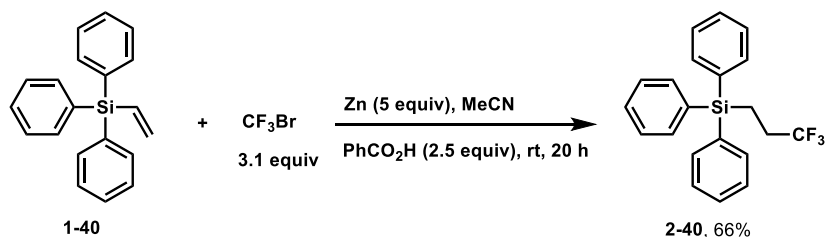

Prepared according to the general procedure using alkene **1-40** (286.5 mg, 1.0 mmol),  $\text{CF}_3\text{Br}$  (3.1 mmol),  $\text{Zn}$  (327.0 mg, 5.0 mmol),  $\text{PhCO}_2\text{H}$  (305.3 mg, 2.5 mmol) and  $\text{MeCN}$  (3 mL). After stirring for 20 h at rt, the reaction mixture was added sat.  $\text{KMnO}_4$  aq. (2 mL) for 15 min in an ice-bath and  $\text{Na}_2\text{CO}_3$  aq. (3 mL) for 15 min., and concentrated. The residue was filtered through a pad of Celite eluting with  $\text{DCM}$  (30 mL) and concentrated. The residue was extracted with  $\text{DCM}$  (20 mL  $\times$  3), washed with sat.  $\text{NaCl}$  aq., dried over  $\text{Na}_2\text{SO}_4$ , and concentrated. The residue was purified by silica gel chromatography (petroleum ether) to afford **2-40**<sup>12</sup> (234.6 mg, 66% yield) as a white solid.

**TLC**:  $R_f = 0.63$  in petroleum ether

**m.p.**: 112.9–113.9  $^\circ\text{C}$ .

$^1\text{H NMR}$  (400 MHz,  $\text{CDCl}_3$ )  $\delta$  7.53–7.50 (m, 6H), 7.46–7.37 (m, 9H), 2.22–2.09 (m, 2H), 1.61–1.57 (m, 2H).

$^{13}\text{C NMR}$  (101 MHz,  $\text{CDCl}_3$ )  $\delta$  135.63, 133.67, 130.07, 128.33, 127.81 (q,  $J = 276.7$  Hz), 29.18 (q,  $J = 30.0$  Hz), 5.47 (q,  $J = 2.3$  Hz).

$^{19}\text{F NMR}$  (376 MHz,  $\text{CDCl}_3$ ):  $\delta$  -69.13.

**MS** (EI):  $m/z$  (%) 356 ( $\text{M}^+$ , 0.47), 258 (100).

### (4,4,4-trifluorobutan-2-yl)benzene (2-41, p4-87)

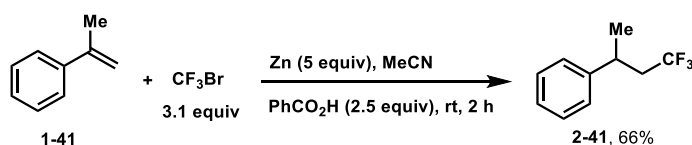

Prepared according to the general procedure using alkene **1-41** (130  $\mu$ L,  $d = 0.909$  g/mL, 1.0 mmol),  $\text{CF}_3\text{Br}$  (3.1 mmol), Zn (327.5 mg, 5.0 mmol),  $\text{PhCO}_2\text{H}$  (305.8 mg, 2.5 mmol) and MeCN (3 mL). After stirring for 2 h at rt, the reaction mixture was added sat.  $\text{Na}_2\text{CO}_3$  aq. (3 mL) and stirred for 15 min, then directly purified by silica gel chromatography (pentane) to afford **2-41**<sup>1</sup> (124.0 mg, 66% yield) as a colorless oil.

**TLC:**  $R_f = 0.86$  in petroleum ether.

**$^1\text{H}$  NMR** (400 MHz,  $\text{CDCl}_3$ )  $\delta$  7.34–7.30 (m, 2H), 7.25–7.19 (m, 3H), 3.17–3.08 (m, 1H), 2.57–2.26 (m, 2H), 1.36 (d,  $J = 6.3$  Hz, 3H).

**$^{13}\text{C}$  NMR** (101 MHz,  $\text{CDCl}_3$ )  $\delta$  145.43, 128.82, 126.83, 126.80 (q,  $J = 277.6$  Hz), 126.75, 41.81 (q,  $J = 27.2$  Hz), 34.32 (q,  $J = 2.6$  Hz), 22.26.

**$^{19}\text{F}$  NMR** (376 MHz,  $\text{CDCl}_3$ ):  $\delta$  -64.43.

**MS** (EI):  $m/z$  (%) 188 ( $\text{M}^+$ , 37.33), 105 (100).

### 1-methyl-4-(4,4,4-trifluorobutan-2-yl)benzene (**2-42**, p6-56)

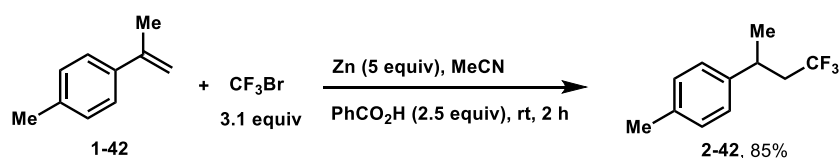

Prepared according to the general procedure using alkene **1-42** (152  $\mu$ L,  $d = 0.904$  g/mL, 1.0 mmol),  $\text{CF}_3\text{Br}$  (3.1 mmol), Zn (327.0 mg, 5.0 mmol),  $\text{PhCO}_2\text{H}$  (305.3 mg, 2.5 mmol) and MeCN (3 mL). After stirring for 2 h at rt, the reaction mixture was added sat.  $\text{Na}_2\text{CO}_3$  aq. (3 mL) and stirred for 15 min, then directly purified by silica gel chromatography (pentane) to afford **2-42** (172.4 mg, 85% yield) as a colorless oil.

**TLC:**  $R_f = 0.50$  in petroleum ether.

**$^1\text{H}$  NMR** (400 MHz,  $\text{CDCl}_3$ )  $\delta$  7.14–7.08 (m, 4H), 3.13–3.04 (m, 1H), 2.48–2.24 (m, 5H), 1.34 (dd,  $J = 7.0, 1.0$  Hz, 3H).

**$^{13}\text{C}$  NMR** (101 MHz,  $\text{CDCl}_3$ )  $\delta$  142.48, 136.36, 129.49, 126.85 (q,  $J = 277.5$  Hz), 126.61, 41.87 (q,  $J = 27.1$  Hz), 33.91 (q,  $J = 2.8$  Hz), 22.33, 21.09.

**$^{19}\text{F}$  NMR** (376 MHz,  $\text{CDCl}_3$ ):  $\delta$  -64.41.

**IR** (neat): 2972, 2927, 2858, 1374, 1277, 1254, 1149, 1085, 1033, 814.

**MS** (EI):  $m/z$  (%) 202 ( $\text{M}^+$ , 30.72), 119 (100).

**HRMS** (EI):  $m/z$  calc'd for  $\text{C}_{11}\text{H}_{13}\text{F}_3$  ( $\text{M}^+$ ): 202.0964, found 202.0962.

### 1-chloro-4-(4,4,4-trifluorobutan-2-yl)benzene (**2-43**, p6-57)

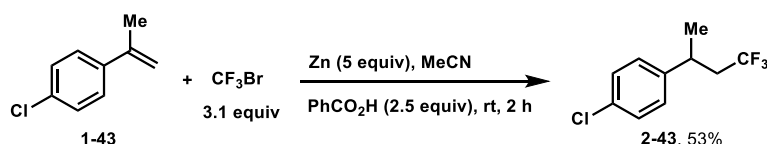

Prepared according to the general procedure using alkene **1-43** (143  $\mu\text{L}$ ,  $d = 1.065 \text{ g/mL}$ , 1.0 mmol),  $\text{CF}_3\text{Br}$  (3.1 mmol), Zn (327.0 mg, 5.0 mmol),  $\text{PhCO}_2\text{H}$  (305.3 mg, 2.5 mmol) and MeCN (3 mL). After stirring for 2 h at rt, the reaction mixture was added sat.  $\text{Na}_2\text{CO}_3$  aq. (3 mL) and stirred for 15 min, then directly purified by silica gel chromatography (pentane) to afford **2-43** (117.9 mg, 53% yield) as a colorless oil.

**TLC:**  $R_f = 0.67$  in petroleum ether.

**$^1\text{H NMR}$**  (400 MHz,  $\text{CDCl}_3$ )  $\delta$  7.31–7.27 (m, 2H), 7.15–7.12 (m, 2H), 3.15–3.06 (m, 1H), 2.47–2.22 (m, 2H), 1.34 (d,  $J = 7.0 \text{ Hz}$ , 3H).

**$^{13}\text{C NMR}$**  (101 MHz,  $\text{CDCl}_3$ )  $\delta$  143.76, 132.53, 128.96, 128.15, 126.61 (q,  $J = 277.5 \text{ Hz}$ ), 41.69 (q,  $J = 27.2 \text{ Hz}$ ), 33.84 (q,  $J = 2.9 \text{ Hz}$ ), 22.27.

**$^{19}\text{F NMR}$**  (376 MHz,  $\text{CDCl}_3$ ):  $\delta$  -64.41.

**IR** (neat): 2975, 2934, 2856, 1495, 1374, 1279, 1257, 1149, 1127, 1015, 827.

**MS** (EI):  $m/z$  (%) 222 ( $\text{M}^+$ , 34.81), 139 (100).

**HRMS** (EI):  $m/z$  calc'd for  $\text{C}_{10}\text{H}_{10}\text{ClF}_3$  ( $\text{M}^+$ ): 222.0418, found 222.0421.

#### 1-fluoro-4-(4,4,4-trifluorobutan-2-yl)benzene (**2-44**, p6-58)

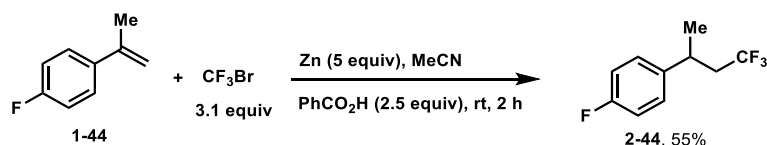

Prepared according to the general procedure using alkene **1-44** (135  $\mu\text{L}$ ,  $d = 1.01 \text{ g/mL}$ , 1.0 mmol),  $\text{CF}_3\text{Br}$  (3.1 mmol), Zn (327.0 mg, 5.0 mmol),  $\text{PhCO}_2\text{H}$  (305.3 mg, 2.5 mmol) and MeCN (3 mL). After stirring for 2 h at rt, the reaction mixture was added sat.  $\text{Na}_2\text{CO}_3$  aq. (3 mL) and stirred for 15 min, then directly purified by silica gel chromatography (pentane) to afford **2-44** (113.7 mg, 55% yield) as a colorless oil.

**TLC:**  $R_f = 0.52$  in petroleum ether.

**$^1\text{H NMR}$**  (400 MHz,  $\text{CDCl}_3$ )  $\delta$  7.19–7.13 (m, 2H), 7.03–6.97 (m, 2H), 3.16–3.07 (m, 1H), 2.46–2.25 (m, 2H), 1.34 (d,  $J = 7.0 \text{ Hz}$ , 3H).

**$^{13}\text{C NMR}$**  (101 MHz,  $\text{CDCl}_3$ )  $\delta$  161.75 (d,  $J = 244.5 \text{ Hz}$ ), 141.02 (d,  $J = 3.4 \text{ Hz}$ ), 128.20 (d,  $J = 7.9 \text{ Hz}$ ), 126.67 (q,  $J = 277.4 \text{ Hz}$ ), 115.59 (d,  $J = 21.3 \text{ Hz}$ ), 41.92 (q,  $J = 27.2 \text{ Hz}$ ), 33.70 (q,  $J = 2.6 \text{ Hz}$ ), 22.41.

**$^{19}\text{F NMR}$**  (376 MHz,  $\text{CDCl}_3$ ):  $\delta$  -64.42, -116.93.

**IR** (neat): 2970, 2927, 2857, 1607, 1513, 1374, 1254, 1232, 1148, 834.

**MS** (EI):  $m/z$  (%) 206 ( $\text{M}^+$ , 32.49), 123 (100).

**HRMS** (EI):  $m/z$  calc'd for  $\text{C}_{10}\text{H}_{10}\text{F}_4$  ( $\text{M}^+$ ): 206.0713, found 206.0711.

### *tert*-butyl 4-(2,2,2-trifluoroethyl)piperidine-1-carboxylate (**2-45**, p5-79)

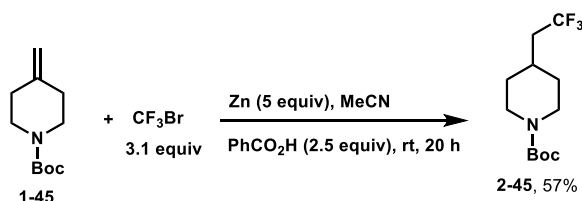

Prepared according to the general procedure using alkene **1-45** (197  $\mu\text{L}$ ,  $d = 1.0 \text{ g/mL}$ , 1.0 mmol),  $\text{CF}_3\text{Br}$  (3.1 mmol),  $\text{Zn}$  (327.0 mg, 5.0 mmol),  $\text{PhCO}_2\text{H}$  (305.3 mg, 2.5 mmol) and  $\text{MeCN}$  (3 mL). After stirring for 20 h at rt, the reaction mixture was added sat.  $\text{KMnO}_4$  aq. (1 mL) for 15 min in an ice-bath and  $\text{Na}_2\text{CO}_3$  aq. (3 mL) for 15 min., and concentrated. The residue was filtered through a pad of Celite eluting with DCM (30 mL) and concentrated. The residue was extracted with DCM (15 mL  $\times$  3), washed with sat.  $\text{NaCl}$  aq., dried over  $\text{Na}_2\text{SO}_4$ , and concentrated. The residue was purified by silica gel chromatography (petroleum ether/EtOAc = 15:1) to afford **2-45**<sup>10</sup> (151.4 mg, 57% yield) as a light yellow oil.

**TLC:**  $R_f = 0.34$  in 10:1 petroleum ether/EtOAc.

**$^1\text{H}$  NMR** (400 MHz,  $\text{CDCl}_3$ )  $\delta$  4.09 (br s, 2H), 2.72 (t,  $J = 12.9 \text{ Hz}$ , 2H), 2.09–1.99 (m, 2H), 1.88–1.74 (m, 3H), 1.46 (s, 9H), 1.30–1.16 (m, 2H).

**$^{13}\text{C}$  NMR** (101 MHz,  $\text{CDCl}_3$ )  $\delta$  154.80, 126.90 (q,  $J = 277.3 \text{ Hz}$ ), 79.56, 43.63, 40.14 (q,  $J = 27.4 \text{ Hz}$ ), 31.99, 30.66 (q,  $J = 2.8 \text{ Hz}$ ), 28.49.

**$^{19}\text{F}$  NMR** (376 MHz,  $\text{CDCl}_3$ ):  $\delta$  -63.81.

**MS** (EI):  $m/z$  (%) 166 ((M–Boc)<sup>+</sup>, 1.18), 57 (100).

### 3-(2,2,2-trifluoroethyl)dihydrofuran-2(3H)-one (**2-46**, p5-166)

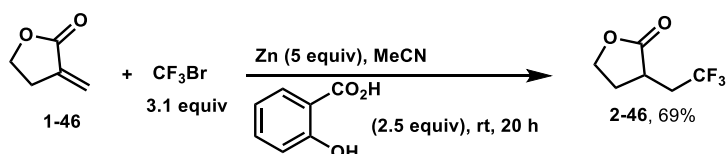

Prepared according to the general procedure using alkene **1-46** (88  $\mu\text{L}$ ,  $d = 1.119 \text{ g/mL}$ , 1.0 mmol),  $\text{CF}_3\text{Br}$  (3.1 mmol),  $\text{Zn}$  (327.0 mg, 5.0 mmol), salicylic acid (345.3 mg, 2.5 mmol) and  $\text{MeCN}$  (3 mL). After stirring for 20 h at rt, the reaction mixture was added sat.  $\text{Na}_2\text{CO}_3$  aq. (3 mL) for 15 min., and filtered through a pad of Celite eluting with EtOAc (30 mL). The resulting solution was concentrated, and the residue was extracted with EtOAc (20 mL  $\times$  3), washed with sat.  $\text{NaCl}$  aq., dried over  $\text{Na}_2\text{SO}_4$ , and concentrated. The residue was purified by silica gel chromatography (petroleum ether/EtOAc = 8:1) to afford **2-46** (116.4 mg, 69% yield) as a light yellow oil.

**TLC:**  $R_f = 0.36$  in 8:1 petroleum ether/EtOAc.

**$^1\text{H}$  NMR** (400 MHz,  $\text{CDCl}_3$ )  $\delta$  4.44 (t,  $J = 9.1 \text{ Hz}$ , 1H), 4.26–4.20 (m, 1H), 2.94–2.80 (m, 2H), 2.63–2.56 (m, 1H), 2.22–2.00 (m, 2H).

$^{13}\text{C}$  NMR (101 MHz,  $\text{CDCl}_3$ )  $\delta$  176.79, 126.38 (q,  $J = 276.2$  Hz), 66.80, 34.90 (q,  $J = 29.9$  Hz), 34.61 (q,  $J = 2.8$  Hz), 29.35.

$^{19}\text{F}$  NMR (376 MHz,  $\text{CDCl}_3$ ):  $\delta$  -65.96.

IR (neat): 2958, 2922, 2853, 1774, 1727, 1378, 1286, 1255, 1179, 1137, 1043, 1024, 960, 753, 742.

MS (EI):  $m/z$  (%) 168 ( $\text{M}^+$ , 0.38), 61 (100).

HRMS (ESI $^+$ ):  $m/z$  calc'd for  $\text{C}_6\text{H}_8\text{F}_3\text{O}_2$  ( $\text{M} + \text{H}$ ) $^+$ : 169.0471, found 169.0468.

#### (4-(2,2,2-trifluoroethyl)cyclohexyl)benzene (2-47, p5-48)

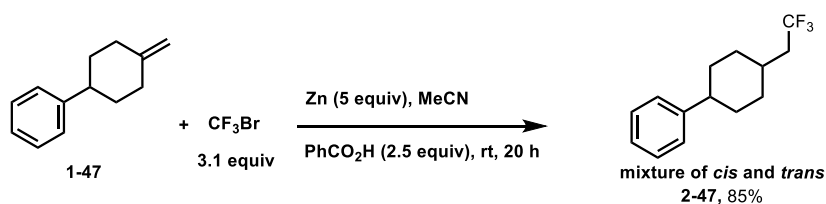

Prepared according to the general procedure using alkene **1-47** (172.9 mg, 1.0 mmol),  $\text{CF}_3\text{Br}$  (3.1 mmol), Zn (327.0 mg, 5.0 mmol),  $\text{PhCO}_2\text{H}$  (305.3 mg, 2.5 mmol) and MeCN (3 mL). After stirring for 20 h at rt, the reaction mixture was added sat.  $\text{KMnO}_4$  aq. (1 mL) for 15 min in an ice-bath, and  $\text{Na}_2\text{CO}_3$  aq. (3 mL) for 15 min, then filtered through a pad of Celite eluting with DCM (30 mL). The resulting solution was concentrated, and the residue was directly purified by silica gel chromatography (petroleum ether) to afford **2-47** (206.3 mg, 85% yield) mixture (*cis* and *trans*) as a colorless oil.

TLC:  $R_f = 0.55$  in petroleum ether.

$^1\text{H}$  NMR (400 MHz,  $\text{CDCl}_3$ )  $\delta$  7.32–7.28 (m, 2H), 7.24–7.17 (m, 3H), 2.63–2.44 (m, 1H), 2.26–2.16 (m, 1H), 2.09–1.91 (m, 4H), 1.81–1.60 (m, 3H), 1.53–1.43 (m, 1H), 1.26–1.16 (m, 2H).

$^{13}\text{C}$  NMR (101 MHz,  $\text{CDCl}_3$ )  $\delta$  147.19, 146.81, 128.51, 127.71 (q,  $J = 277.2$  Hz), 127.31 (q,  $J = 277.3$  Hz), 126.96, 126.90, 126.16, 126.11, 127.31 (q,  $J = 277.3$  Hz), 44.01, 43.14, 40.89 (q,  $J = 27.1$  Hz), 36.24 (q,  $J = 26.9$  Hz), 33.92, 33.47, 31.98 (q,  $J = 2.2$  Hz), 30.32, 28.74, 27.60 (q,  $J = 2.2$  Hz).

$^{19}\text{F}$  NMR (376 MHz,  $\text{CDCl}_3$ ):  $\delta$  -63.72, -64.58.

IR (neat): 3028, 2928, 2858, 1452, 1261, 1233, 1161, 1139, 1113, 1050, 833, 756, 699.

MS (EI):  $m/z$  (%) 242 ( $\text{M}^+$ , 2.77), 91 (100).

HRMS (EI):  $m/z$  calc'd for  $\text{C}_{14}\text{H}_{17}\text{F}_3$  ( $\text{M}$ ) $^+$ : 242.1282, found 242.2848.



### methyl 4,4,4-trifluoro-2-phenylbutanoate (2-48, p7-42)

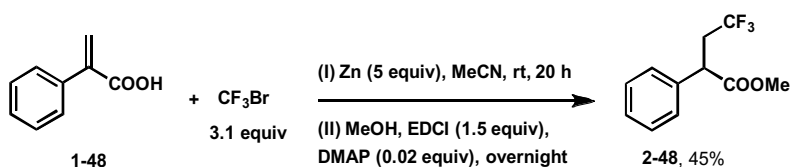

Step I: Prepared according to the general procedure using alkene **1-48** (148.1 mg, 1.0 mmol),  $\text{CF}_3\text{Br}$  (3.1 mmol), Zn (328.2 mg, 5.0 mmol) and MeCN (3 mL). After stirring for 20 h at rt, the reaction mixture was filtered through a pad of Celite eluting with EtOAc (30 mL) and concentrated. The residue was extracted with EtOAc (30 mL  $\times$  3), washed with sat. NaCl aq., dried over  $\text{Na}_2\text{SO}_4$ , and concentrated.

Step II: The mixture was dissolved in MeOH (3 mL), added EDCI (290.2 mg, 1.5 mmol) and DMAP (2.6 mg). After stirring for overnight, MeOH was removed by concentration, the mixture was dissolved in MeCN (3 mL), and added sat.  $\text{KMnO}_4$  aq. (2 mL) for 15 min in an ice-bath. The solution was filtered through a pad of Celite eluting with DCM (30 mL) and concentrated. The residue was extracted with DCM (30 mL  $\times$  3), washed with sat. NaCl aq., dried over  $\text{Na}_2\text{SO}_4$ , and concentrated. The reaction mixture was purified by silica gel chromatography (petroleum ether/EtOAc = 30:1) to afford **2-48** (105.4 mg, 45%) as a light yellow oil.

**TLC:**  $R_f$  = 0.55 in 10:1 petroleum ether/EtOAc.

**$^1\text{H NMR}$**  (400 MHz,  $\text{CDCl}_3$ )  $\delta$  7.37–7.28 (m, 5H), 3.90 (dd,  $J$  = 8.8, 5.4 Hz, 1H), 3.69 (s, 3H), 3.18–3.05 (m, 1H), 2.55–2.42 (m, 1H).

**$^{13}\text{C NMR}$**  (101 MHz,  $\text{CDCl}_3$ )  $\delta$  172.50, 137.16, 129.14, 128.14, 127.67, 126.12 (q,  $J$  = 277.0 Hz), 52.63, 45.31 (q,  $J$  = 2.9 Hz), 37.45 (q,  $J$  = 28.8 Hz).

**$^{19}\text{F NMR}$**  (376 MHz,  $\text{CDCl}_3$ ):  $\delta$  -65.92.

**IR** (neat): 3036, 2958, 2850, 1744, 1457, 1438, 1388, 1341, 1327, 1264, 1208, 1142, 1118, 699.

**MS** (ED):  $m/z$  (%) 232 ( $\text{M}^+$ , 47.45), 109 (100).

**HRMS** (ESI $^+$ ):  $m/z$  calc'd for  $\text{C}_{11}\text{H}_{11}\text{F}_3\text{O}_2\text{Na}$  ( $\text{M} + \text{Na}$ ) $^+$ : 255.0603, found 255.0604.

### methyl 2-benzyl-4,4,4-trifluorobutanoate (2-49, p7-40)

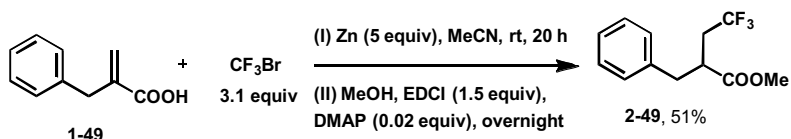

Step I: Prepared according to the general procedure using alkene **1-49** (162.5 mg, 1.0 mmol),  $\text{CF}_3\text{Br}$  (3.1 mmol), Zn (329.2 mg, 5.0 mmol) and MeCN (3 mL). After stirring for 20 h at rt, the reaction mixture was filtered through a pad of Celite eluting with EtOAc (30 mL) and concentrated. The residue was extracted with  $\text{Et}_2\text{O}$  (30 mL  $\times$  3), washed with sat. NaCl

aq., dried over Na<sub>2</sub>SO<sub>4</sub>, and concentrated.

Step II: The mixture was dissolved in MeOH (3 mL), added EDCI (290.1 mg, 1.5 mmol) and DMAP (2.6 mg). After stirring for overnight, MeOH was removed by concentration, the mixture was dissolved in MeCN (3 mL), and added sat. KMnO<sub>4</sub> aq. (2 mL) for 15 min in an ice-bath. The solution was filtered through a pad of Celite eluting with DCM (30 mL) and concentrated. The residue was extracted with Et<sub>2</sub>O (30 mL × 3), washed with sat. NaCl aq., dried over Na<sub>2</sub>SO<sub>4</sub>, and concentrated. The residue was purified by silica gel chromatography (petroleum ether/EtOAc = 30:1) to afford **2-49** (125.6 mg, 51%) as a light yellow oil.

**TLC:** R<sub>f</sub> = 0.64 in 10:1 petroleum ether/EtOAc.

**<sup>1</sup>H NMR** (400 MHz, CDCl<sub>3</sub>) δ 7.31 (t, *J* = 7.5 Hz, 2H), 7.24 (d, *J* = 7.2 Hz, 1H), 7.15 (d, *J* = 7.4 Hz, 2H), 3.64 (s, 3H), 3.04–2.96 (m, 2H), 2.85–2.79 (m, 1H), 2.67–2.54 (m, 1H), 2.26–2.13 (m, 1H).

**<sup>13</sup>C NMR** (101 MHz, CDCl<sub>3</sub>) δ 173.90, 137.35, 128.97, 128.75, 127.10, 126.31 (q, *J* = 276.7 Hz), 52.04, 41.39 (q, *J* = 2.1 Hz), 38.33, 35.17 (q, *J* = 29.1 Hz).

**<sup>19</sup>F NMR** (376 MHz, CDCl<sub>3</sub>): δ -65.67.

**IR** (neat): 3068, 2958, 2856, 1744, 1438, 1379, 1258, 1169, 1144, 1107, 803, 701.

**MS** (EI): *m/z* (%) 246 (M<sup>+</sup>, 57.19), 90 (100).

**HRMS** (ESI<sup>+</sup>): *m/z* calc'd for C<sub>12</sub>H<sub>13</sub>F<sub>3</sub>O<sub>2</sub>Na (M + Na)<sup>+</sup>: 269.0760, found 269.0762.

#### benzyl 4,4,4-trifluoro-2-methylbutanoate (**2-50**, p5-36)

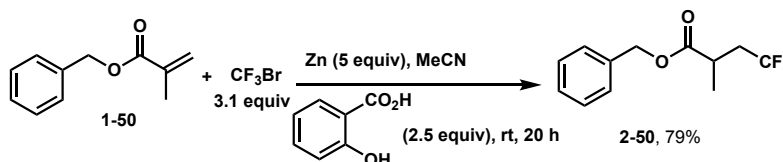

Prepared according to the general procedure using alkene **1-50** (169 μL, d = 1.04 g/mL, 1.0 mmol), CF<sub>3</sub>Br (3.1 mmol), Zn (327.0 mg, 5.0 mmol), salicylic acid (345.3 mg, 2.5 mmol) and MeCN (3 mL). After stirring for 20 h at rt, the reaction mixture was added sat. KMnO<sub>4</sub> aq. (2 mL) for 15 min in an ice-bath and Na<sub>2</sub>CO<sub>3</sub> aq. (3 mL) for 15 min., and concentrated. The residue was extracted with EtOAc (15 mL × 3), washed with sat. NaCl aq., dried over Na<sub>2</sub>SO<sub>4</sub>, and concentrated. The residue was purified by silica gel chromatography (petroleum ether) to afford **2-50** (194.7 mg, 79% yield) as a light yellow oil.

**TLC:** R<sub>f</sub> = 0.38 in 80:1 petroleum ether/EtOAc.

**<sup>1</sup>H NMR** (400 MHz, CDCl<sub>3</sub>) δ 7.40–7.31 (m, 5H), 5.15 (s, 2H), 2.89–2.80 (m, 1H), 2.75–2.61 (m, 1H), 2.23–2.10 (m, 1H), 1.31 (d, *J* = 7.2 Hz, 3H).

**<sup>13</sup>C NMR** (101 MHz, CDCl<sub>3</sub>) δ 174.27, 135.75, 128.70, 128.46, 128.27, 126.44 (q, *J* = 276.7 Hz), 66.95, 37.05 (q, *J* = 28.8 Hz), 34.19 (q, *J* = 2.7 Hz), 17.55.

**<sup>19</sup>F NMR** (376 MHz, CDCl<sub>3</sub>): δ -65.34.

**IR** (neat): 3037, 2957, 2851, 1743, 1258, 1159, 1032, 803, 751, 698.

**MS** (EI):  $m/z$  (%) 246 ( $M^+$ , 13.62), 91 (100).

**HRMS** (EI):  $m/z$  calc'd for  $C_{12}H_{13}F_3O_2$  ( $M^+$ ): 246.0862, found 246.0864.

#### 4,4,4-trifluoro-2-methylbutanamide (**2-51**, p5-156)

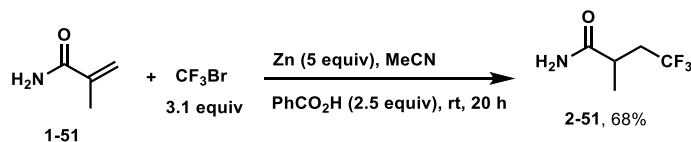

Prepared according to the general procedure using alkene **1-51** (85.1 mg, 1.0 mmol),  $CF_3Br$  (3.1 mmol), Zn (327.0 mg, 5.0 mmol),  $PhCO_2H$  (305.3 mg, 2.5 mmol) and MeCN (3 mL). After stirring for 20 h at rt, the reaction mixture was added sat.  $Na_2CO_3$  aq. (3 mL) for 15 min., and filtered through a pad of Celite eluting with EtOAc (30 mL). The resulting solution was concentrated, and the residue was extracted with EtOAc (20 mL  $\times$  3), washed with sat. NaCl aq., dried over  $Na_2SO_4$ , and concentrated. The residue was purified by silica gel chromatography (petroleum ether/EtOAc = 10:1 (5% AcOH), 2:1 and 1:3, respectively) to afford **2-51** (104.9 mg, 68% yield) as a white solid.

**TLC**:  $R_f$  = 0.54 in 1:5 petroleum ether/EtOAc.

**m.p.**: 91.0~91.8 °C.

**$^1H$  NMR** (400 MHz,  $DMSO-d_6$ )  $\delta$  7.44 (s, 1H), 6.88 (s, 1H), 2.66–2.53 (m, 2H), 2.26–2.14 (m, 1H), 1.10 (d,  $J$  = 6.1 Hz, 3H).

**$^{13}C$  NMR** (101 MHz,  $DMSO-d_6$ )  $\delta$  175.50, 127.06 (q,  $J$  = 276.9 Hz), 35.92 (q,  $J$  = 27.2 Hz), 33.62 (q,  $J$  = 2.9 Hz), 18.46.

**$^{19}F$  NMR** (376 MHz,  $DMSO-d_6$ ):  $\delta$  -62.98.

**IR** (neat): 3368, 3184, 2984, 2923, 1669, 1636, 1371, 1325, 1294, 1270, 1246, 1179, 1149, 1131, 1108, 1057, 1023, 836, 661.

**MS** (ESI):  $m/z$  (%) 156 ( $(M + H)^+$ ), 156 (100).

**HRMS** (ESI $^+$ ):  $m/z$  calc'd for  $C_5H_8F_3NONa$  ( $M + Na$ ) $^+$ : 178.0450, found 178.0450.

#### (4*R*,4*aS*,6*R*)-4,4*a*-dimethyl-6-((*S*)-4,4,4-trifluorobutan-2-yl)-4,4*a*,5,6,7,8-hexahydronaphthalen-2(3*H*)-one (**2-52**, p6-36)

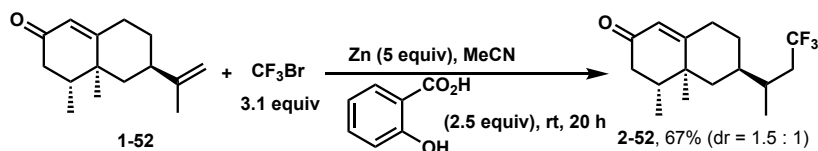

Prepared according to the general procedure using alkene **1-52** (218.3 mg, 1.0 mmol),  $CF_3Br$  (3.1 mmol), Zn (327.0 mg, 5.0 mmol), salicylic acid (345.3 mg, 2.5 mmol) and MeCN (3 mL). After stirring for 20 h at rt, the reaction mixture was added sat.  $Na_2CO_3$  aq. (3 mL) for 15

min., and filtered through a pad of Celite eluting with DCM (30 mL) and concentrated. The residue was extracted with DCM (20 mL × 3), washed with sat. NaCl aq., dried over Na<sub>2</sub>SO<sub>4</sub>, and concentrated. The residue was purified by silica gel chromatography (petroleum ether : EtOAc = 7:1) to afford **2-52**<sup>13</sup> (193.2 mg, 67% yield, dr 1.5 : 1) as a light yellow oil. Less than 2% of isomer (if any) was observed in <sup>19</sup>F NMR.

**TLC:** R<sub>f</sub> = 0.69 in 2:1 petroleum ether/EtOAc.

**<sup>1</sup>H NMR** (400 MHz, CDCl<sub>3</sub>, dr = 1.5 : 1) δ 5.76 (s, 1H), 2.51–2.33 (m, 2H), 2.30–2.10 (m, 3H), 2.04–1.71 (m, 5H), 1.33–1.11 (m, 3H), 1.09 (d, *J* = 3.2 Hz, 3H), 1.01–0.97 (m, 6H).

**<sup>13</sup>C NMR** (101 MHz, CDCl<sub>3</sub>, dr = 1.5 : 1) δ 199.43, 170.23, 127.43 (q, *J* = 277.2 Hz), 124.74, 124.71, 42.39, 42.07, 40.62, 40.59, 40.54, 39.32, 39.20, 38.12 (q, *J* = 27.1 Hz), 37.67 (q, *J* = 27.2 Hz), 37.53, 37.40, 32.97, 32.84, 32.09–31.94 (m), 29.82, 28.12, 16.91, 16.90, 16.40, 16.09, 14.95, 14.93.

**<sup>19</sup>F NMR** (376 MHz, CDCl<sub>3</sub>, dr = 1.5 : 1): δ -63.97, -64.05.

**MS** (ED): *m/z* (%) 288 (M<sup>+</sup>, 16.17), 91 (100).

**HRMS** (ESI<sup>+</sup>): *m/z* calc'd for C<sub>16</sub>H<sub>23</sub>F<sub>3</sub>ONa (M + Na)<sup>+</sup>: 311.1593, found 311.1590.

**(8*S*,9*S*,13*R*,14*S*)-3-methoxy-13-methyl-17-(2,2,2-trifluoroethyl)-7,8,9,11,12,13,14,15,16,17-decahydro-6*H*-cyclopenta[*a*]phenanthrene (**2-53**, p5-32)**

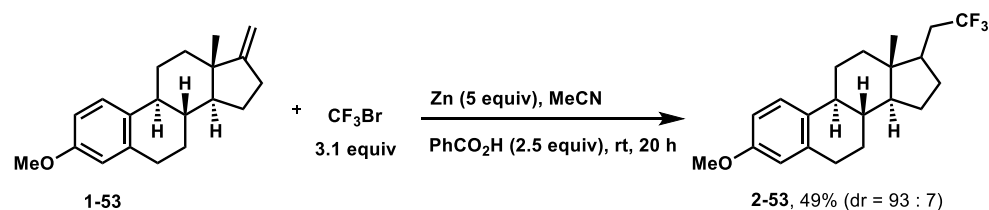

Prepared according to the general procedure using alkene **1-53** (282.2 mg, 1.0 mmol), CF<sub>3</sub>Br (3.1 mmol), Zn (327.0 mg, 5.0 mmol), PhCO<sub>2</sub>H (305.3 mg, 2.5 mmol) and MeCN (3 mL). After stirring for 20 h at rt, the reaction mixture was added sat. KMnO<sub>4</sub> aq. (1 mL) for 15 min in an ice-bath and Na<sub>2</sub>CO<sub>3</sub> aq. (3 mL) for 15 min., and filtered through a pad of Celite eluting with EtOAc (30 mL) and concentrated. The residue was extracted with EtOAc (15 mL × 3), washed with sat. NaCl aq., dried over Na<sub>2</sub>SO<sub>4</sub>, and concentrated. The residue was purified by silica gel chromatography (petroleum ether) to afford **2-53**<sup>13</sup> (173.7 mg, 49% yield) as a white solid.

**TLC:** R<sub>f</sub> = 0.67 in 10:1 petroleum ether/EtOAc.

**m.p.:** 102.9~105.3 °C.

**<sup>1</sup>H NMR** (400 MHz, CDCl<sub>3</sub>, dr = 93 : 7) δ 7.20 (d, *J* = 8.5 Hz, 1H), 6.71 (dd, *J* = 8.5, 2.9 Hz, 1H), 6.63 (d, *J* = 2.8 Hz, 1H), 3.78 (s, 3H), 2.95–2.79 (m, 2H), 2.35–2.15 (m, 3H), 2.09–2.00 (m, 1H), 1.94–1.78 (m, 4H), 1.73–1.65 (m, 1H), 1.51–1.36 (m, 4H), 1.33–1.21 (m, 4H), 0.63 (s, 3H).

$^{13}\text{C}$  NMR (101 MHz,  $\text{CDCl}_3$ ,  $\text{dr} = 93 : 7$ )  $\delta$  157.64, 138.11, 132.77, 127.97 (q,  $J = 276.9$  Hz), 126.38, 113.98, 111.60, 55.30, 54.22, 44.25 (q,  $J = 2.4$  Hz), 44.14, 42.76, 38.98, 37.25, 34.69 (q,  $J = 27.6$  Hz), 29.98, 28.65, 27.94, 26.44, 24.58, 12.55.

$^{19}\text{F}$  NMR (376 MHz,  $\text{CDCl}_3$ ,  $\text{dr} = 93 : 7$ ):  $\delta$  -59.20, -64.80.

MS (ESI):  $m/z$  (%) 353 ((M + H) $^+$ , 1.89), 102 (100).

HRMS (ESI $^+$ ):  $m/z$  calc'd for  $\text{C}_{21}\text{H}_{28}\text{F}_3\text{O}$  (M + H) $^+$ : 353.2087, found 353.2086.

### (3,3,3-trifluoro-2-methylpropyl)benzene (2-54a, p4-77)

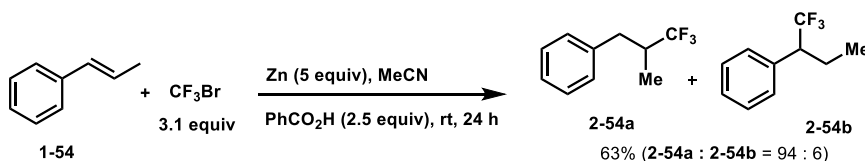

Prepared according to the general procedure using alkene **1-54** (130  $\mu\text{L}$ ,  $d = 0.911$  g/mL, 1.0 mmol),  $\text{CF}_3\text{Br}$  (3.1 mmol), Zn (327.5 mg, 5.0 mmol),  $\text{PhCO}_2\text{H}$  (305.3 mg, 2.5 mmol) and MeCN (3 mL). After stirring for 24 h at rt, the reaction mixture was added sat.  $\text{KMnO}_4$  aq. (1 mL) for 15 min in an ice-bath, and  $\text{Na}_2\text{CO}_3$  aq. (3 mL) for 15 min, then filtered through a pad of Celite eluting with pentane (30 mL). The resulting solution was concentrated, and the residue was purified by silica gel chromatography (pentane) to afford **2-54** (119.0 mg, 63% yield) as a colorless oil. The **2-54b** was consistent with the literature.<sup>14</sup> The ratio of **2-54a** and **2-54b** was calculated as 94:6 by  $^1\text{H}$  NMR and  $^{19}\text{F}$  NMR.

#### 2-54a<sup>1</sup>

TLC:  $R_f = 0.84$  in petroleum ether.

$^1\text{H}$  NMR (400 MHz,  $\text{CDCl}_3$ )  $\delta$  7.34–7.30 (m, 2H), 7.25–7.22 (m, 1H), 7.18–7.16 (m, 2H), 3.17–3.08 (m, 1H), 2.49–2.40 (m, 2H), 1.02 (d,  $J = 6.2$  Hz, 3H).

$^{13}\text{C}$  NMR (101 MHz,  $\text{CDCl}_3$ )  $\delta$  138.30, 129.24, 128.71, 128.34 (q,  $J = 279.5$  Hz), 126.76, 40.20 (q,  $J = 26.3$  Hz), 35.79 (q,  $J = 2.7$  Hz), 12.21 (q,  $J = 2.9$  Hz).

$^{19}\text{F}$  NMR (376 MHz,  $\text{CDCl}_3$ ):  $\delta$  -70.22 (**2-54b**), -74.00.

MS (ED):  $m/z$  (%) 188 ( $\text{M}^+$ , 26.66), 91 (100).

### 1-methoxy-4-(3,3,3-trifluoro-2-methylpropyl)benzene (2-55, p4-25)

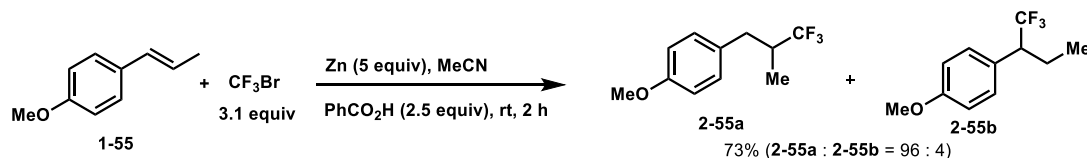

Prepared according to the general procedure using alkene **1-55** (150  $\mu\text{L}$ ,  $d = 0.988$  g/mL, 1.0 mmol),  $\text{CF}_3\text{Br}$  (3.1 mmol), Zn (328.0 mg, 5.0 mmol),  $\text{PhCO}_2\text{H}$  (305.8 mg, 2.5 mmol) and MeCN (3 mL). After stirring for 2 h at rt, the reaction mixture was added sat.  $\text{Na}_2\text{CO}_3$  aq. (3 mL) and stirred for 15 min, then filtered through a pad of Celite eluting with DCM (30 mL).

The resulting solution was concentrated, and extracted with Et<sub>2</sub>O (15 mL × 3). The combined Et<sub>2</sub>O phase was washed with sat. NaCl aq., dried over Na<sub>2</sub>SO<sub>4</sub>, and concentrated. The residue was purified by silica gel chromatography (petroleum ether) to afford **2-55** (160.0 mg, 73% yield) as a light yellow oil. The ratio of **2-55a** and **2-55b** was calculated as 96:4 by <sup>1</sup>H NMR and <sup>19</sup>F NMR.

#### **2-55a**<sup>15</sup>

**TLC:** R<sub>f</sub> = 0.46 in petroleum ether.

**<sup>1</sup>H NMR** (400 MHz, CDCl<sub>3</sub>) δ 7.10–7.06 (m, 2H), 6.87–6.83 (m, 2H), 3.81 (s, 3H), 3.09–3.01 (m, 1H), 2.43–2.33 (m, 2H), 1.01 (d, *J* = 6.3 Hz, 3H).

**<sup>13</sup>C NMR** (101 MHz, CDCl<sub>3</sub>) δ 158.49, 130.28, 130.19, 128.36 (q, *J* = 279.6 Hz), 114.11, 55.38, 40.34 (q, *J* = 25.9 Hz), 34.88 (q, *J* = 2.5 Hz), 12.16 (q, *J* = 2.6 Hz).

**<sup>19</sup>F NMR** (376 MHz, CDCl<sub>3</sub>): δ -70.65 (**2-55b**), -73.93.

**MS** (EI): *m/z* (%) 218 (M<sup>+</sup>, 18.83), 121 (100).

#### **2-(trifluoromethyl)-2,3-dihydro-1H-indene (2-56a, p4-124)**

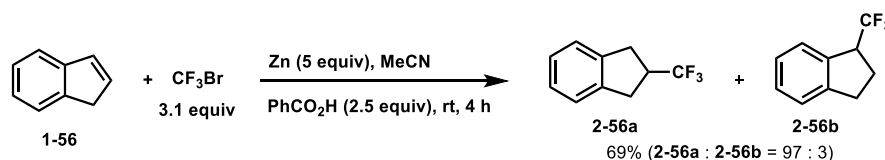

Prepared according to the general procedure using alkene **1-56** (117 μL, d = 0.996 g/mL, 1.0 mmol), CF<sub>3</sub>Br (3.1 mmol), Zn (328.0 mg, 5.0 mmol), PhCO<sub>2</sub>H (305.8 mg, 2.5 mmol) and MeCN (3 mL). After stirring for 4 h at rt, the reaction mixture was added sat. KMnO<sub>4</sub> aq. (1 mL) for 15 min in an ice-bath, and Na<sub>2</sub>CO<sub>3</sub> aq. (3 mL) for 15 min, then filtered through a pad of Celite eluting with pentane (30 mL). The resulting solution was concentrated, and the residue was directly purified by silica gel chromatography (pentane) to afford **2-56** (129.0 mg, 69% yield) as a colorless oil. The ratio of **2-56a** and **2-56b**<sup>16</sup> was calculated as 97:3 by <sup>19</sup>F NMR.

#### **2-56a**<sup>1</sup>

**TLC:** R<sub>f</sub> = 0.67 in petroleum ether.

**<sup>1</sup>H NMR** (400 MHz, CDCl<sub>3</sub>) δ 7.24–7.17 (m, 4H), 3.23–3.12 (m, 5H).

**<sup>13</sup>C NMR** (101 MHz, CDCl<sub>3</sub>) δ 140.71, 128.24 (q, *J* = 277.0 Hz), 127.07, 124.60, 42.61 (q, *J* = 28.1 Hz), 33.03 (q, *J* = 2.7 Hz).

**<sup>19</sup>F NMR** (376 MHz, CDCl<sub>3</sub>): δ -71.17 (**2-56b**), -72.12.

**MS** (EI): *m/z* (%) 186 (M<sup>+</sup>, 58.90), 117 (100).

## 2-(trifluoromethyl)-1,2,3,4-tetrahydronaphthalene (2-57a, p4-183)

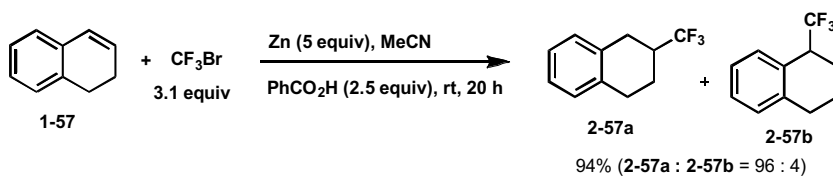

Prepared according to the general procedure using alkene **1-57** (131  $\mu$ L,  $d = 0.997$  g/mL, 1.0 mmol), CF<sub>3</sub>Br (3.1 mmol), Zn (328.0 mg, 5.0 mmol), PhCO<sub>2</sub>H (305.8 mg, 2.5 mmol) and MeCN (3 mL). After stirring for 20 h at rt, the reaction mixture was added sat. KMnO<sub>4</sub> aq. (2 mL) for 15 min in an ice-bath, and Na<sub>2</sub>CO<sub>3</sub> aq. (3 mL) for 15 min, then directly purified by silica gel chromatography (pentane) to afford **2-57** (188.2 mg, 94% yield) as a colorless oil. The **2-57b** is consistent with the literature.<sup>17</sup> The ratio of **2-57a** and **2-57b** was calculated as 96:4 by <sup>1</sup>H NMR and <sup>19</sup>F NMR.

### 2-57a

**TLC:**  $R_f = 0.72$  in petroleum ether.

**<sup>1</sup>H NMR** (400 MHz, CDCl<sub>3</sub>)  $\delta$  7.15–7.09 (m, 4H), 3.03–2.80 (m, 4H), 2.52–2.40 (m, 1H), 2.22–2.15 (m, 1H), 1.77–1.66 (m, 1H).

**<sup>13</sup>C NMR** (101 MHz, CDCl<sub>3</sub>)  $\delta$  135.58, 133.74, 129.30, 128.98, 127.99 (q,  $J = 278.3$  Hz), 126.39, 126.23, 39.42 (q,  $J = 27.1$  Hz), 28.34–28.26 (m), 22.29 (q,  $J = 2.8$  Hz).

**<sup>19</sup>F NMR** (376 MHz, CDCl<sub>3</sub>):  $\delta$  -68.24 (**2-57b**), -74.20.

**IR** (neat): 3025, 2927, 2855, 1498, 1443, 1396, 1330, 1275, 1169, 1143, 1123, 1056, 747.

**MS** (EI):  $m/z$  (%) 200 (M<sup>+</sup>, 81.07), 104 (100).

**HRMS** (EI):  $m/z$  calc'd for C<sub>11</sub>H<sub>11</sub>F<sub>3</sub> (M)<sup>+</sup>: 200.0807, found 200.0807.

## 4-(trifluoromethyl)octane (2-58, p4-116)

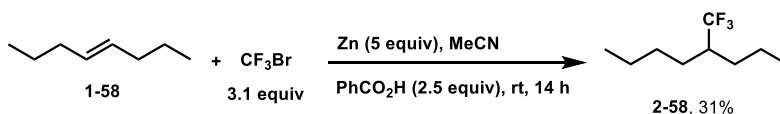

Prepared according to the general procedure using alkene **1-58** (157  $\mu$ L,  $d = 0.715$  g/mL, 1.0 mmol), CF<sub>3</sub>Br (3.1 mmol), Zn (328.0 mg, 5.0 mmol), PhCO<sub>2</sub>H (305.8 mg, 2.5 mmol) and MeCN (3 mL). After stirring for 14 h at rt, the reaction mixture was added sat. KMnO<sub>4</sub> aq. (1 mL) for 15 min in an ice-bath and Na<sub>2</sub>CO<sub>3</sub> aq. (3 mL) for 15 min, then extracted with pentane (15 mL  $\times$  3) and concentrated. The residue was purified by silica gel chromatography (pentane) to afford **2-58** (56.0 mg, 31% yield) as a colorless oil.

**<sup>1</sup>H NMR** (400 MHz, CDCl<sub>3</sub>)  $\delta$  2.05–1.96 (m, 1H), 1.62–1.51 (m, 2H), 1.48–1.23 (m, 8H), 0.94–0.88 (m, 6H).

**<sup>13</sup>C NMR** (101 MHz, CDCl<sub>3</sub>)  $\delta$  128.95 (q,  $J = 280.2$  Hz), 42.50 (q,  $J = 24.6$  Hz), 30.20 (q,  $J = 2.5$  Hz), 29.20, 27.73 (q,  $J = 2.8$  Hz), 22.94, 20.26, 14.28, 14.01.

$^{19}\text{F}$  NMR (376 MHz,  $\text{CDCl}_3$ ):  $\delta$  -70.74.

IR (neat): 2960, 2926, 2855, 1465, 1379, 1261, 1168, 1143, 1112, 800.sss

MS (EI):  $m/z$  (%) 182 ( $\text{M}^+$ , 0.01), 57 (100).

HRMS (EI $^+$ ):  $m/z$  calc'd for  $\text{C}_9\text{H}_{17}\text{F}_3$  ( $\text{M}$ ) $^+$ : 182.1282, found 182.1232.

#### 4. Gram-scale Hydrotrifluoromethylation Reactions

##### 1-(*tert*-butyl)-4-(3,3,3-trifluoropropyl)benzene (2-6, p6-10)

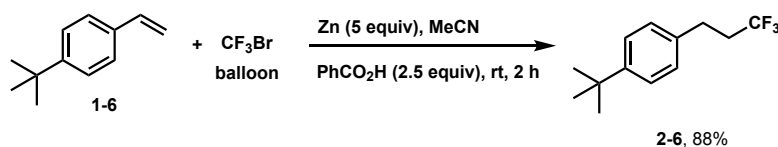

Prepared in 200 mL Schlenk flask according to the general procedure using alkene **1-6** (1.8 mL, 10 mmol),  $\text{CF}_3\text{Br}$  balloon, Zn (3.27 g, 50 mmol),  $\text{PhCO}_2\text{H}$  (3.05 g, 25 mmol) and MeCN (30 mL). After stirring for 2 h at rt, the reaction mixture was added sat.  $\text{Na}_2\text{CO}_3$  aq. (15 mL) and stirred for 15 min, then directly purified by silica gel chromatography (pentane) to afford **2-6** (2.04 g, 88% yield) as a colorless oil.

##### (1*R*,2*S*,5*R*)-2-isopropyl-5-methylcyclohexyl 6,6,6-trifluorohexanoate (2-25a, p6-13)

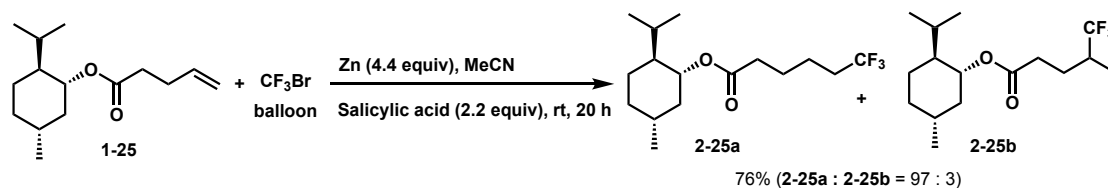

Prepared in 200 mL Schlenk flask according to the general procedure using alkene **1-25** (1.37 g, 5.7 mmol),  $\text{CF}_3\text{Br}$  balloon, Zn (1.63 g, 25 mmol), salicylic acid (1.73 g, 12.5 mmol) and MeCN (15 mL). After stirring for 20 h at rt, the reaction mixture was added sat.  $\text{Na}_2\text{CO}_3$  aq. (15 mL) and stirred for 15 min at rt, and filtered through a pad of Celite eluting with DCM (30 mL) and concentrated. The residue was added sat.  $\text{KMnO}_4$  aq. (5 mL) for 15 min in an ice-bath and extracted with DCM (50 mL  $\times$  3), washed with sat.  $\text{NaCl}$  aq., dried over  $\text{Na}_2\text{SO}_4$ , and concentrated. The residue was purified by silica gel chromatography (petroleum ether : EtOAc = 90:1 to 60:1) to afford **2-25** (1.33 g, 76% yield) as a light yellow oil.



## 5. Hydrotrifluoromethylation of Alkenes with Vinyl Bromide or Benzyl Chloride

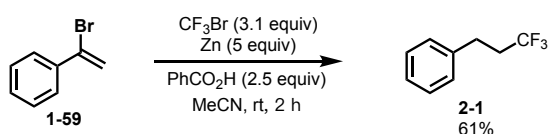

Prepared according to the general procedure using alkene **1-59** (130  $\mu\text{L}$ ,  $d = 1.387\text{g/mL}$ , 1.0 mmol),  $\text{CF}_3\text{Br}$  (3.1 mmol),  $\text{Zn}$  (327.0 mg, 5.0 mmol),  $\text{PhCO}_2\text{H}$  (305.3 mg, 2.5 mmol) and  $\text{MeCN}$  (3 mL). After stirring for 2 h at rt, the reaction mixture was added sat.  $\text{Na}_2\text{CO}_3$  aq. (3 mL) and stirred for 15 min, then directly purified by silica gel chromatography (pentane) to afford **2-1** (106.0 mg, 61% yield) as a colorless oil.

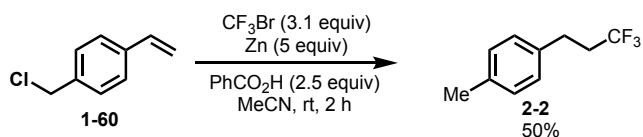

Prepared according to the general procedure using alkene **1-60** (141  $\mu\text{L}$ ,  $d =$  , 1.0 mmol),  $\text{CF}_3\text{Br}$  (3.1 mmol),  $\text{Zn}$  (327.0 mg, 5.0 mmol),  $\text{PhCO}_2\text{H}$  (305.3 mg, 2.5 mmol) and  $\text{MeCN}$  (3 mL). After stirring for 2 h at rt, the reaction mixture was added sat.  $\text{Na}_2\text{CO}_3$  aq. (3 mL) and stirred for 15 min, then directly purified by silica gel chromatography (pentane) to afford **2-2** (93.4 mg, 50% yield) as a colorless oil.

## 6. Mechanism Studies

### Preparation of cyclic product 4 (p6-8-3)

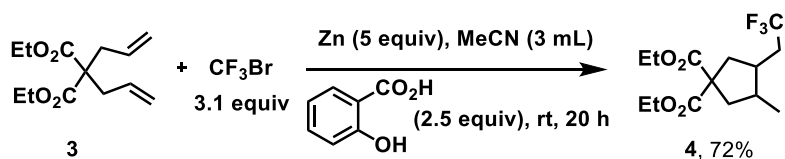

Prepared according to the general procedure using alkene **3** (240.4 mg, 1.0 mmol),  $\text{CF}_3\text{Br}$  (3.1 mmol), Zn (327.0 mg, 5.0 mmol), salicylic acid (345.3 mg, 2.5 mmol) and MeCN (3 mL). After stirring for 20 h at rt, the reaction mixture was added sat.  $\text{Na}_2\text{CO}_3$  aq. (15 mL) for 15 min., and filtered through a pad of Celite eluting with DCM (30 mL) and concentrated. The residue was extracted with DCM (20 mL  $\times$  3), washed with sat. NaCl aq., dried over  $\text{Na}_2\text{SO}_4$ , and concentrated. The residue was purified by silica gel chromatography (petroleum ether : EtOAc = 20:1 and petroleum ether:DCM = 1:1) to afford **4**<sup>8</sup> (224.0 mg, 72% yield) as a light yellow oil.

**TLC:**  $R_f$  = 0.33 in 20:1 petroleum ether/EtOAc.

**$^1\text{H}$  NMR** (400 MHz,  $\text{CDCl}_3$ , dr = 9:1, major product)  $\delta$  4.19 (q,  $J$  = 7.3 Hz, 4H), 2.67–2.43 (m, 2H), 2.34–1.96 (m, 6H), 1.24 (t,  $J$  = 7.3 Hz, 6H), 1.03–0.86 (m, 3H).

**$^{13}\text{C}$  NMR** (101 MHz,  $\text{CDCl}_3$ )  $\delta$  172.63, 172.59, 127.26 (q,  $J$  = 276.8 Hz), 61.61, 61.59, 58.77, 41.26, 38.05, 36.59 (q,  $J$  = 2.7 Hz), 36.03, 34.03 (q,  $J$  = 28.0 Hz), 14.92, 14.04.

**$^{19}\text{F}$  NMR** (376 MHz,  $\text{CDCl}_3$ ):  $\delta$  -65.12 (minor), -65.16 (major).

**MS** (ESI):  $m/z$  (%) 311 ((M + H)<sup>+</sup>, 59.33), 256 (100).

### Preparation of $\text{PhCO}_2\text{D}$ (p6-34)

To a 50 mL of Schlenk flask was added  $\text{PhCO}_2\text{Na}$  (360.3 mg, 2.5 mmol) in  $\text{N}_2$ . The flask was added anhydrous THF (6 mL) and DCl (470  $\mu\text{L}$ , 20% in  $\text{D}_2\text{O}$ ). After stirring for 0.5 h at rt. The procedure was repeated 3 times to afford  $\text{PhCO}_2\text{D}$ . It was directly used for the next step.

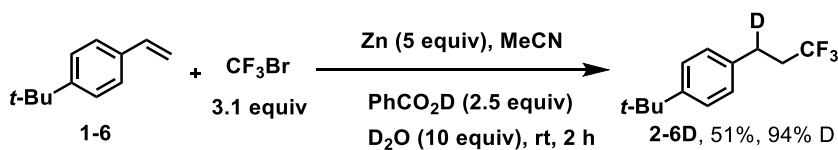

Prepared according to the general procedure using alkene **1-6** (183  $\mu\text{L}$ , 1.0 mmol),  $\text{CF}_3\text{Br}$  (3.1 mmol), Zn (328.3 mg, 5.0 mmol),  $\text{PhCO}_2\text{D}$  (307.8 mg, 2.5 mmol),  $\text{D}_2\text{O}$  (181  $\mu\text{L}$ , 10 mmol) and MeCN (3 mL). After stirring for 2 h at rt, the reaction mixture was added sat.  $\text{Na}_2\text{CO}_3$  aq. (3 mL) and stirred for 15 min, then directly purified by silica gel chromatography (pentane) to afford **2-6D** (118.9 mg, 51% yield) as a colorless oil.

**TLC:**  $R_f$  = 0.66 in petroleum ether.

**$^1\text{H}$  NMR** (400 MHz,  $\text{CDCl}_3$ )  $\delta$  7.34 (d,  $J$  = 8.4 Hz, 2H), 7.13 (d,  $J$  = 8.2 Hz, 2H), 2.86–2.80 (m, 1H), 2.46–2.32 (m, 2H), 1.31 (s, 9H).

<sup>13</sup>C NMR (101 MHz, CDCl<sub>3</sub>) δ 149.74, 136.07, 128.04, 131.08–122.83 (m), 125.77, 35.75 (q, *J* = 28.2 Hz), 34.58, 31.51, 27.85–27.24 (m).

<sup>19</sup>F NMR (376 MHz, CDCl<sub>3</sub>): δ -67.23, -67.26.

IR (neat): 2967, 2910, 2871, 1376, 1367, 1266, 1256, 1141, 1115, 822.

MS (EI): *m/z* (%) 231 ((M)<sup>+</sup>, 2.75), 216 (100).

HRMS (ESI<sup>+</sup>): *m/z* calc'd for C<sub>13</sub>H<sub>17</sub>DF<sub>3</sub> (M + H)<sup>+</sup>: 232.1418, found 232.1416.

#### The Reaction of Styrene with CF<sub>3</sub>Br and Zn without PhCO<sub>2</sub>H (P3-142)

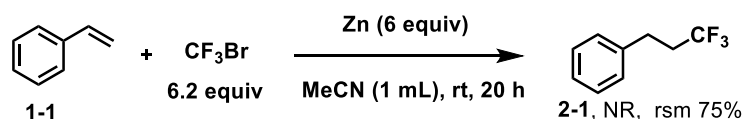

Prepared in 25 mL Schlenk flask according to the general procedure using alkene **1-1** (29 μL, *d* = 0.906 g/mL, 0.25 mmol), CF<sub>3</sub>Br (6.2 equiv), Zn (98.1 mg, 1.5 mmol) and MeCN (1 mL). After stirring for 20 h at rt, the reaction mixture was analyzed by NMR analysis of the crude reaction mixture with mesitylene as the internal standard.

#### Test on the Hydrotrifluoromethylation of Styrene in the Standard Condition with 1 equiv of TMEPO (P5-193)

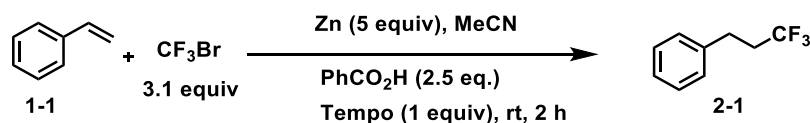

Prepared in 50 mL Schlenk flask according to the general procedure using alkene **1-1** (115 μL, *d* = 0.906 g/mL, 1.0 mmol), CF<sub>3</sub>Br (3.1 mmol), Zn (327.5 mg, 5.0 mmol), PhCO<sub>2</sub>H (305.3 mg, 2.5 mmol), TEMPO (156.2 mg, 1.0 mmol) and MeCN (3 mL). After stirring for 2 h at rt, the reaction mixture was analyzed by NMR. The results were showed in Table S8.

#### Test on the Hydrotrifluoromethylation of Styrene in the Standard Condition with 1 equiv of BHT (P6-100)

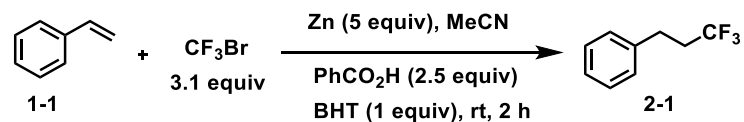

Prepared in 50 mL Schlenk flask according to the general procedure using alkene **1-1** (115 μL, *d* = 0.906 g/mL, 1.0 mmol), CF<sub>3</sub>Br (3.1 mmol), Zn (327.5 mg, 5.0 mmol), PhCO<sub>2</sub>H (305.3 mg, 2.5 mmol), BHT (220.4 mg, 1.0 mmol) and MeCN (3 mL). After stirring for 2 h at rt, the reaction mixture was analyzed by NMR. The results were showed in Table S8.

**Table S8:**

| entry | additive | yield of <b>2-1</b> (%) <sup>a</sup> | rsm (%) <sup>b</sup> |
|-------|----------|--------------------------------------|----------------------|
| 1     | TEMPO    | 0                                    | 97                   |
| 2     | BHT      | 0                                    | 96                   |

<sup>a</sup>The yield was determined by <sup>19</sup>F NMR analysis of the crude reaction mixture with PhCF<sub>3</sub> as the internal standard; <sup>b</sup> rsm was determined by NMR analysis of the crude reaction mixture with mesitylene as the internal standard.

### Tests on the Hydrotrifluoromethylation of Styrene with Premixed Zn, CF<sub>3</sub>Br and PhCO<sub>2</sub>H (or none) (P6-74, p6-75)

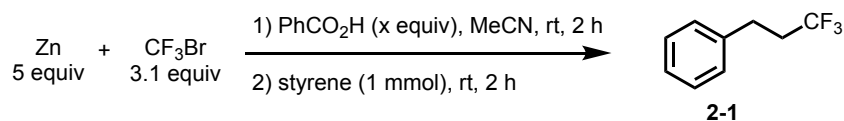

To a 50 mL of Schlenk flask was added Zn (327.0 mg, 5.0 mmol) and PhCO<sub>2</sub>H (305.3 mg, 2.5 mmol; or none), CF<sub>3</sub>Br (3.1 equiv) and MeCN (3 mL). After stirring for 2 h at rt, the flask was added alkene **1-1** (115 μL, d = 0.906 g/mL, 1.0 mmol) and stirred for 2 h at rt, the reaction mixture was analyzed by NMR. The results were showed in Table S9.

**Table S9:**

| entry | x   | yield of <b>2-1</b> (%) <sup>a</sup> | rsm (%) <sup>b</sup> |
|-------|-----|--------------------------------------|----------------------|
| 1     | 0   | 0                                    | 97                   |
| 2     | 2.5 | 0                                    | 95                   |

<sup>a</sup>The yield was determined by <sup>19</sup>F NMR analysis of the crude reaction mixture with PhCF<sub>3</sub> as the internal standard; <sup>b</sup> rsm was determined by NMR analysis of the crude reaction mixture with mesitylene as the internal standard.

### Preparation of CF<sub>3</sub>ZnBr•2MeCN (P6-84)<sup>18</sup>

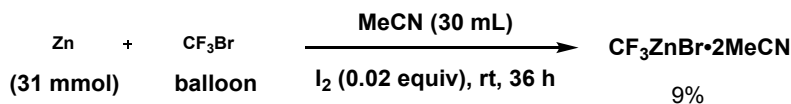

CF<sub>3</sub>ZnBr•2MeCN was prepared according to the reference 18 with CF<sub>3</sub>Br balloon.

To a 50 mL of Schlenk flask was added Zn powder (2.0 g, 31 mmol) and I<sub>2</sub> (150 mg, 0.6 mmol), and then it was evacuated for 30 s and filled with CF<sub>3</sub>Br. The flask was added MeCN (30 mL), and CF<sub>3</sub>Br was bubbled to saturate it in the solution for 5 min. Then it was equipped with an CF<sub>3</sub>Br balloon for 36 h at rt. The mixture was filtered in glove box. The filtrate was concentrated, and the residue was washed with Cl<sub>3</sub>CF and dried to give the CF<sub>3</sub>ZnBr•2MeCN (800 mg, 9%) as a white solid.

<sup>1</sup>H NMR (400 MHz, CD<sub>2</sub>Cl<sub>2</sub>) δ 2.22 (s, 6H).

$^{19}\text{F}$  NMR (376 MHz,  $\text{CD}_2\text{Cl}_2$ ):  $\delta$  -45.55.

### Tests on the Stability of $\text{CF}_3\text{ZnBr}\cdot 2\text{MeCN}$ (P6-94)

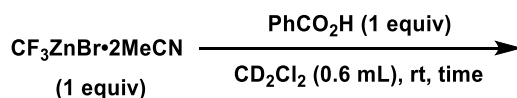

$\text{CF}_3\text{ZnBr}\cdot 2\text{MeCN}$  (10.0 mg, 0.034 mmol) and  $\text{CD}_2\text{Cl}_2$  (0.6 mL) were added to an NMR tube in glove box, and then it was sealed and tested  $^1\text{H}$  NMR and  $^{19}\text{F}$  NMR spectra. After that,  $\text{PhCO}_2\text{H}$  (4.2 mg, 0.034 mmol) was added to the tube in the glove box, and then the remaining  $\text{CF}_3\text{ZnBr}\cdot 2\text{MeCN}$  was monitored through NMR ( $^1\text{H}$  NMR and  $^{19}\text{F}$  NMR).  $\text{CF}_3\text{ZnBr}\cdot 2\text{MeCN}$  was fully hydrolyzed in 19 min. The results were showed in Table S10.

**Table S10:** Stability Experiment of  $\text{CF}_3\text{ZnBr}\cdot 2\text{MeCN}$

| entry | time (min) | rsm <sup>a</sup> |
|-------|------------|------------------|
| 1     | 0          | 100              |
| 2     | 10.0       | 28               |
| 3     | 13.0       | 16               |
| 4     | 14.5       | 7                |
| 5     | 16.0       | 2                |
| 6     | 17.5       | 0.8              |
| 7     | 19.0       | 0                |

<sup>a</sup> rsm was determined by  $^{19}\text{F}$  NMR analysis of the crude reaction mixture with  $\text{CFCl}_3$  as the internal standard.

### Tests on the Hydrotrifluoromethylation of Styrene with $\text{CF}_3\text{ZnBr}\cdot 2\text{MeCN}$ (P6-85, p6-86)

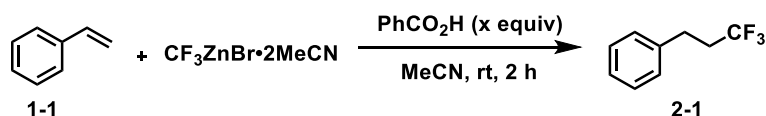

To a 25 mL of Schlenk tube was added  $\text{CF}_3\text{ZnBr}\cdot 2\text{MeCN}$  (296.4 mg, 1.0 mmol),  $\text{PhCO}_2\text{H}$  (61.1 mg, 0.5 mmol; or 0 mg) in the glove box. The flask was sealed and evacuated for 30 s with an oil pump outside and backfilled with  $\text{CF}_3\text{Br}$ , and then added  $\text{MeCN}$  (1 mL) and alkene **1-1** (23  $\mu\text{L}$ ,  $d = 0.906 \text{ g/mL}$ , 0.2 mmol). After stirring for 2 h at rt, the reaction mixture was analyzed by NMR. The results were showed in Table S11.

**Table S11:**

| entry | x   | yield of <b>2-1</b> (%) <sup>a</sup> | rsm (%) <sup>b</sup> |
|-------|-----|--------------------------------------|----------------------|
| 1     | 0   | 0                                    | 100                  |
| 2     | 2.5 | 0                                    | 100                  |

<sup>a</sup>The yield was determined by <sup>19</sup>F NMR analysis of the crude reaction mixture with PhCF<sub>3</sub> as the internal standard; <sup>b</sup>rsm was determined by <sup>1</sup>H NMR analysis of the crude reaction mixture with mesitylene as the internal standard.

### Tests on the Hydrotrifluoromethylation of Styrene with CF<sub>3</sub>Br in the Presence of ZnCl<sub>2</sub> or NaH (P6-188, P6-189)

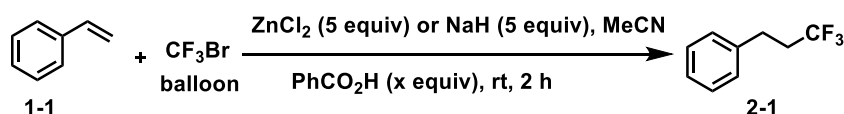

To a 25 mL of Schlenk tube was added NaH (120.0 mg, 5.0 mmol) or ZnCl<sub>2</sub> (681.5 mg, 5.0 mmol), PhCO<sub>2</sub>H (305.3 mg, 2.5 mmol or 0 mg) in the glove box. The flask was sealed evacuated for 30 s with an oil pump outside and equipped with CF<sub>3</sub>Br balloon, and then added MeCN (1 mL) and alkene **1-1** (115 μL, d = 0.906 g/mL, 1.0 mmol). After stirring for 2 h at rt, the reaction mixture was analyzed by NMR. The results were showed in Table S12.

**Table S12:**

| entry                  | x   | yield of <b>2-1</b> (%) <sup>a</sup> | rsm (%) <sup>b</sup> |
|------------------------|-----|--------------------------------------|----------------------|
| 1 (ZnCl <sub>2</sub> ) | 0   | 0                                    | 95                   |
| 2 (ZnCl <sub>2</sub> ) | 2.5 | 0                                    | 100                  |
| 3 (NaH)                | 0   | 0                                    | 100                  |
| 4 (NaH)                | 2.5 | 0                                    | 88                   |

<sup>a</sup>The yield was determined by <sup>19</sup>F NMR analysis of the crude reaction mixture with PhCF<sub>3</sub> as the internal standard; <sup>b</sup>rsm was determined by <sup>1</sup>H NMR analysis of the crude reaction mixture with mesitylene as the internal standard.

### Tests on the Hydrotrifluoromethylation of Styrene with CF<sub>3</sub>Br in the Presence of premixed ZnCl<sub>2</sub> and NaH (P6-187)

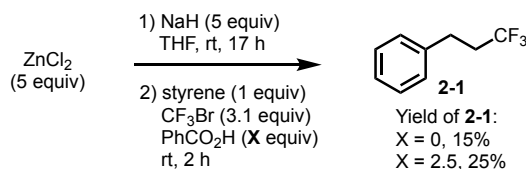

To a 25 mL of Schlenk tube was added sat. NaH (120.0 mg, 5.0 mmol) and ZnCl<sub>2</sub> (681.5 mg, 5.0 mmol) and THF (3 mL) in the glove box. After stirring for 17 h at rt, the reaction solvent was removed and then it was added PhCO<sub>2</sub>H (305.3 mg, 2.5 mmol or 0 mg). The flask was sealed and evacuated for 30 s with an oil pump and equipped with CF<sub>3</sub>Br balloon. Then,

MeCN (3 mL) and alkene **1-1** (115  $\mu$ L,  $d = 0.906$  g/mL, 1.0 mmol) were added. After stirring for 2 h at rt, the reaction mixture was analyzed by NMR. The results were showed in Table S13.

**Table S13:**

| entry | x   | yield of <b>2-1</b> (%) <sup>a</sup> | rsm (%) <sup>b</sup> |
|-------|-----|--------------------------------------|----------------------|
| 1     | 0   | 15                                   | 65                   |
| 2     | 2.5 | 25                                   | 67                   |

<sup>a</sup> the yield was determined by <sup>19</sup>F NMR analysis of the crude reaction mixture with PhCF<sub>3</sub> as the internal standard; <sup>b</sup> rsm was determined by <sup>1</sup>H NMR analysis of the crude reaction mixture with mesitylene as the internal standard.

### Reduction of (1-bromoethyl)benzene (**5**) with Zn/PhCO<sub>2</sub>H

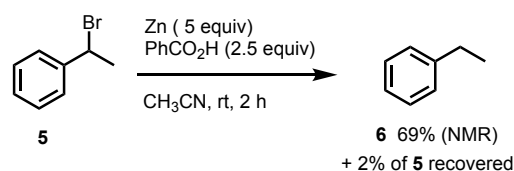

Under N<sub>2</sub> atmosphere, a 25 mL of Schlenk tube was added Zn (327.0 mg, 5.0 mmol), PhCO<sub>2</sub>H (305.3 mg, 2.5 mmol) and CH<sub>3</sub>CN (3 mL), then (1-bromoethyl)benzene (**5**) was added. After stirring for 2 h at rt, the reaction mixture was analyzed by <sup>1</sup>H NMR with mesitylene as the internal standard, and 69% of ethylbenzene **6** was formed with 2% of **5** recovered. The crude <sup>1</sup>H NMR is as follow:

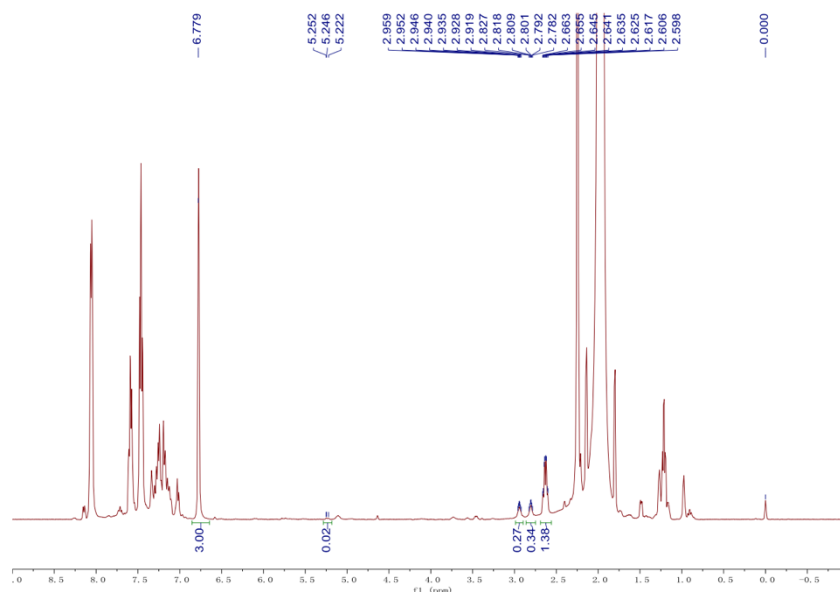

## 7. References

1. N. J. W. Straathof, S. E. Cramer, V. Hessel and T. Noël, *Angew. Chem. Int. Ed.*, 2016, **55**, 15549-15553.
2. X. Zou, J. Zou, L. Yang, G. Li and H. Lu, *J. Org. Chem.*, 2017, **82**, 4677-4688.
3. K.-Y. Ye, G. Pombar, N. Fu, G. S. Sauer, I. Keresztes and S. Lin, *J. Am. Chem. Soc.*, 2018, **140**, 2438-2441.
4. S. Choi, Y. J. Kim, S. M. Kim, J. W. Yang, S. W. Kim and E. J. Cho, *Nat. Commun.*, 2014, **5**, 4881-4887.
5. C. Lévêque, L. Chenneberg, V. Corcé, J.-P. Goddard, C. Ollivier and L. Fensterbank, *Org. Chem. Front.*, 2016, **3**, 462-465.
6. B. He, Q. Pan, Y. Guo, Q.-Y. Chen and C. Liu, *Org. Lett.*, 2020, **22**, 6552-6556.
7. X. Tan, Z. Liu, H. Shen, P. Zhang, Z. Zhang and C. Li, *J. Am. Chem. Soc.*, 2017, **139**, 12430-12433.
8. W. Zhang, Z. Zou, Y. Wang, Y. Wang, Y. Liang, Z. Wu, Y. Zheng and Y. Pan, *Angew. Chem. Int. Ed.*, 2019, **58**, 624-627.
9. Y. Imagawa, S. Yoshikawa, T. Fukuhara and S. Hara, *Chem. Commun.*, 2011, **47**, 9191-9193.
10. J.-X. Xiang, Y. Ouyang, X.-H. Xu and F.-L. Qing, *Angew. Chem. Int. Ed.*, 2019, **58**, 10320-10324.
11. N. Erdeljac, G. Kehr, M. Ahlqvist, L. Knerr and R. Gilmour, *Chem. Commun.*, 2018, **54**, 12002-12005.
12. T. Braun, F. Wehmeier and K. Altenhöner, *Angew. Chem. Int. Ed.*, 2007, **46**, 5321-5324.
13. A.-L. Barthelemy, G. Dagousset and E. Magnier, *Eur. J. Org. Chem.*, 2020, **2020**, 1429-1432.
14. M. Engman, P. Cheruku, P. Tolstoy, J. Bergquist, S. F. Völker and P. G. Andersson, *Adv. Synth. Catal.*, 2009, **351**, 375-378.
15. D. J. Wilger, N. J. Gesmundo and D. A. Nicewicz, *Chem. Sci.*, 2013, **4**, 3160-3165.
16. C. Aubert, J.-P. Bégué, D. Bonnet-Delpon and D. Mesureur, *J. Chem. Soc., Perkin Trans. 1*, 1989, 395-399.
17. D. Bonnet-Delpon, C. Cambillau, M. Charpentier-Morize, R. Jacquot, D. Mesureur and M. Ourevitch, *J. Org. Chem.*, 1988, **53**, 754-759.
18. D. Naumann, W. Tyrra, B. Kock, W. Rudolph and B. Wilkes, *J. Fluorine Chem.*, 1994, **67**, 91-93.



## 8. NMR spectra

### 2-1

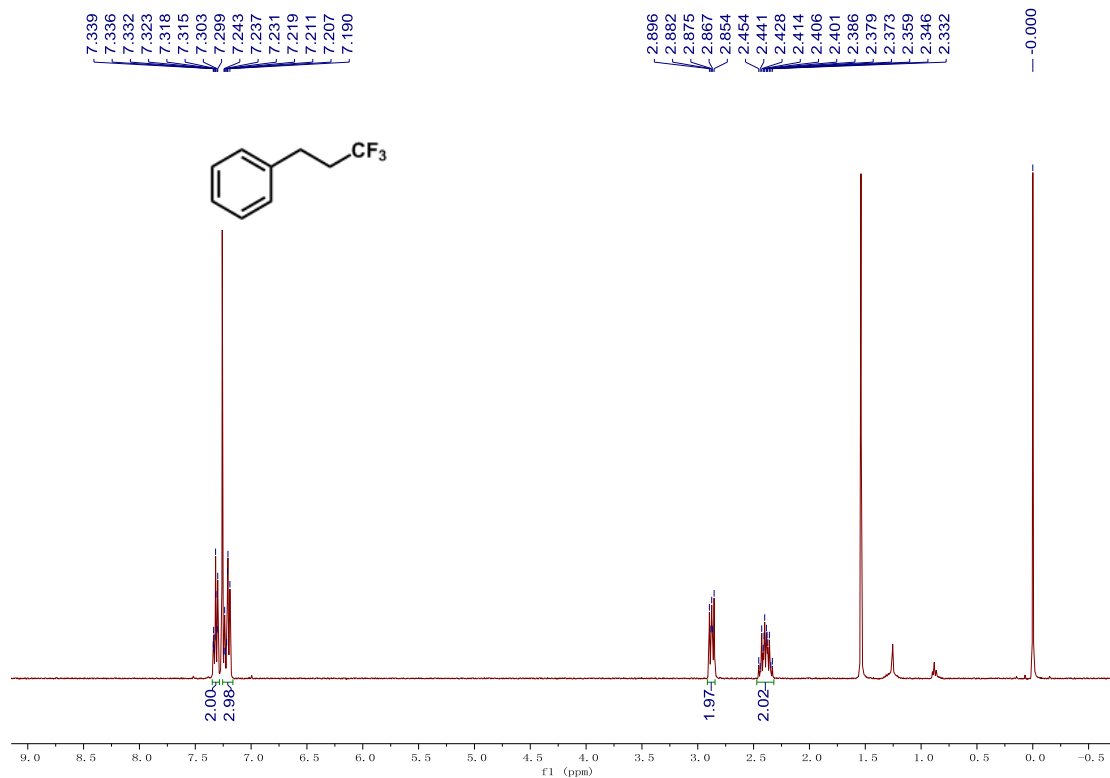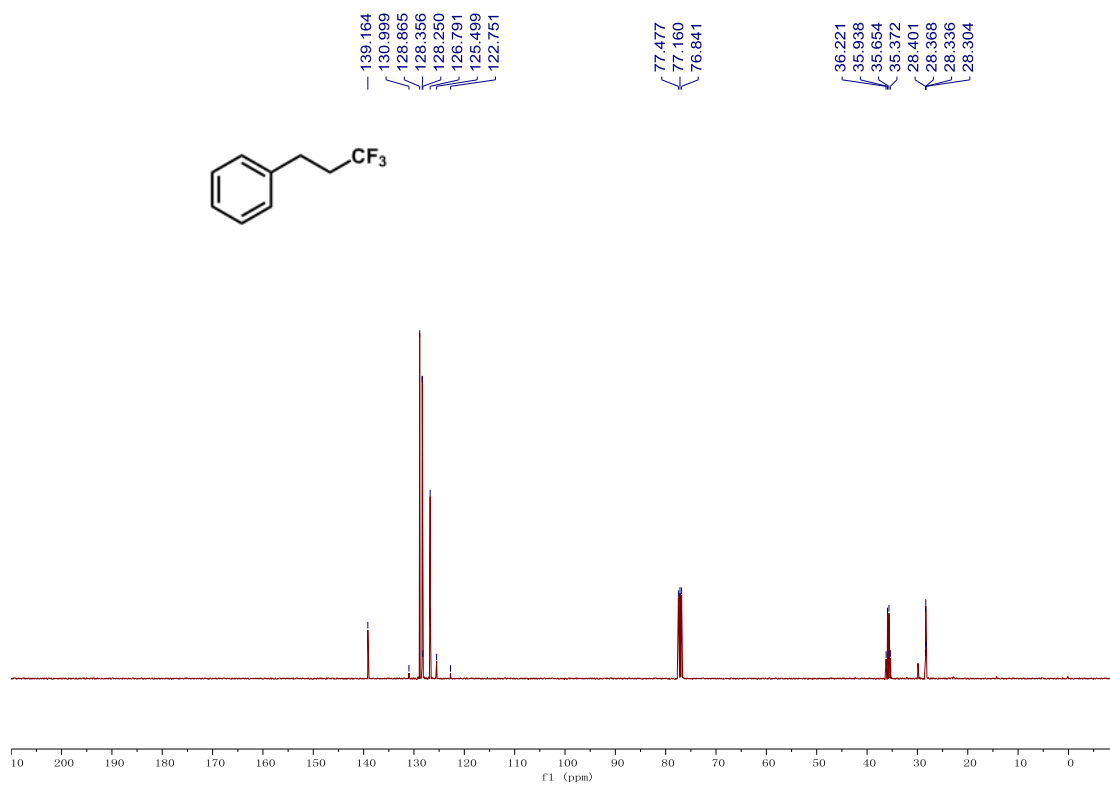

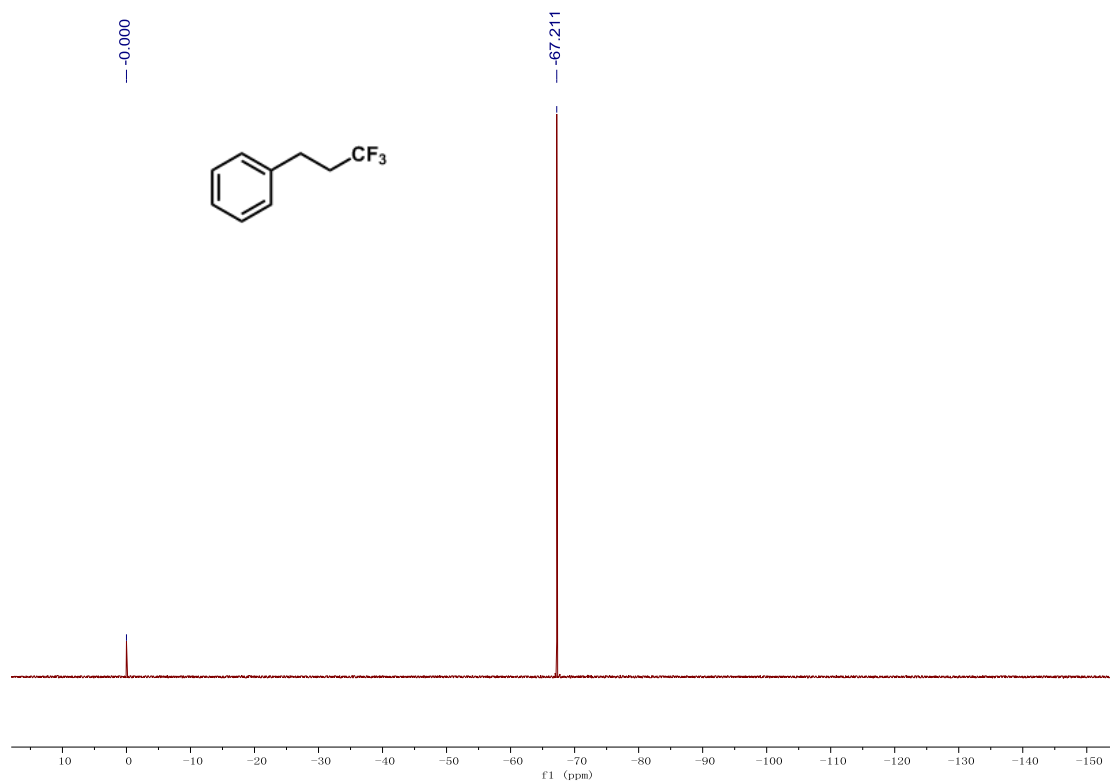

2-2

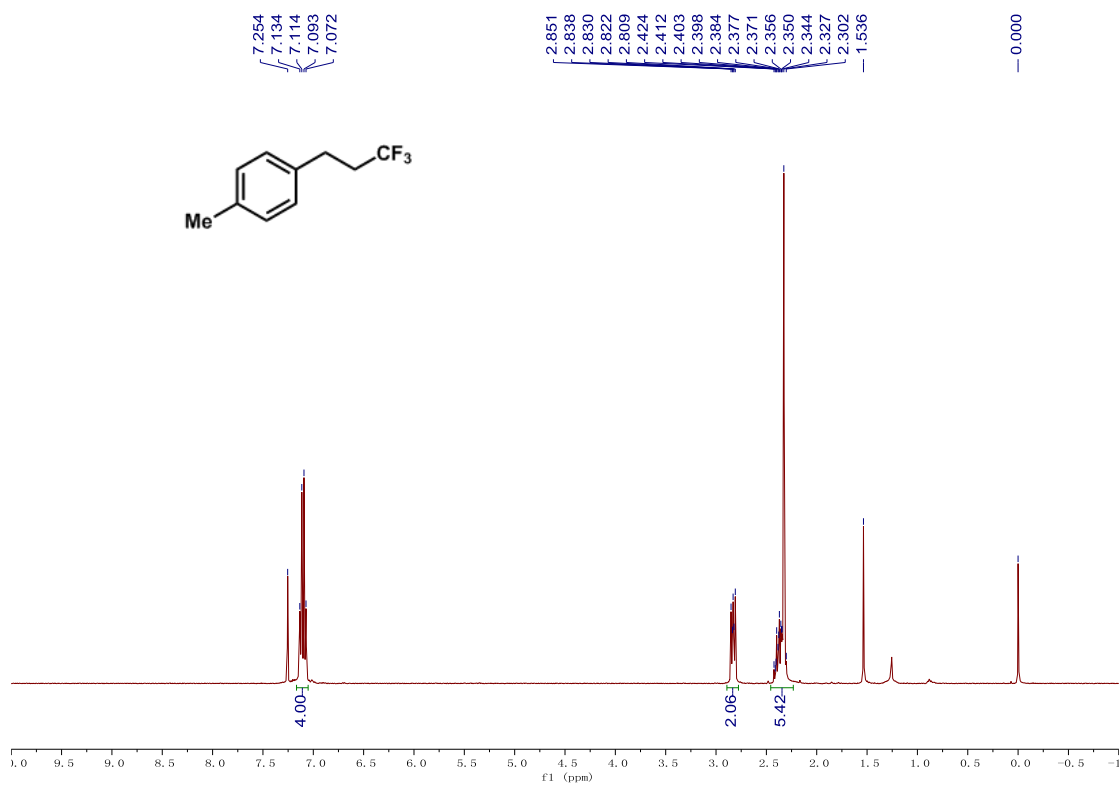

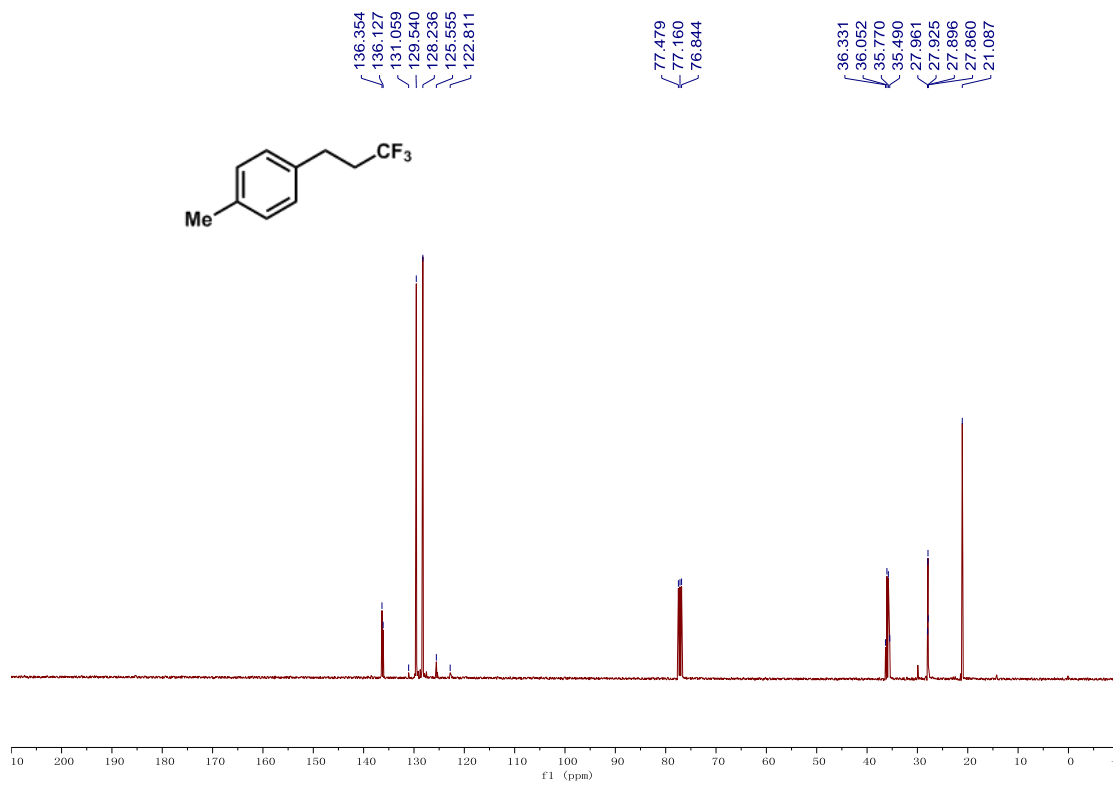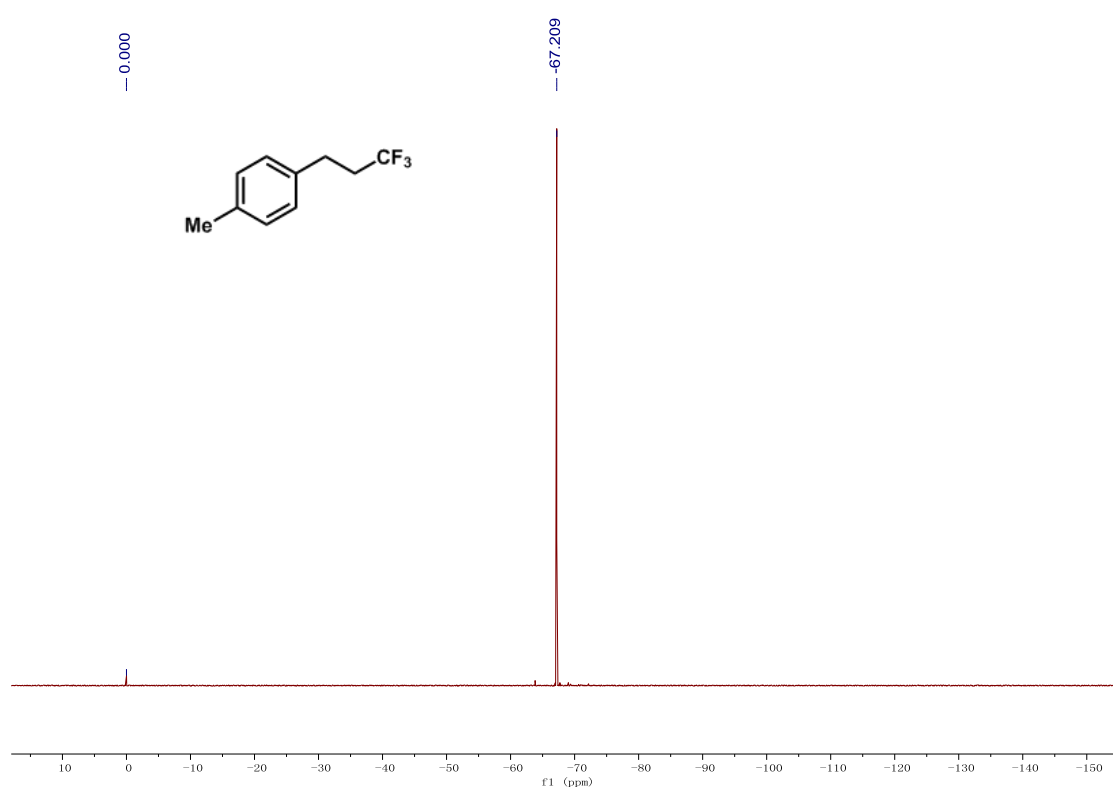

2-3

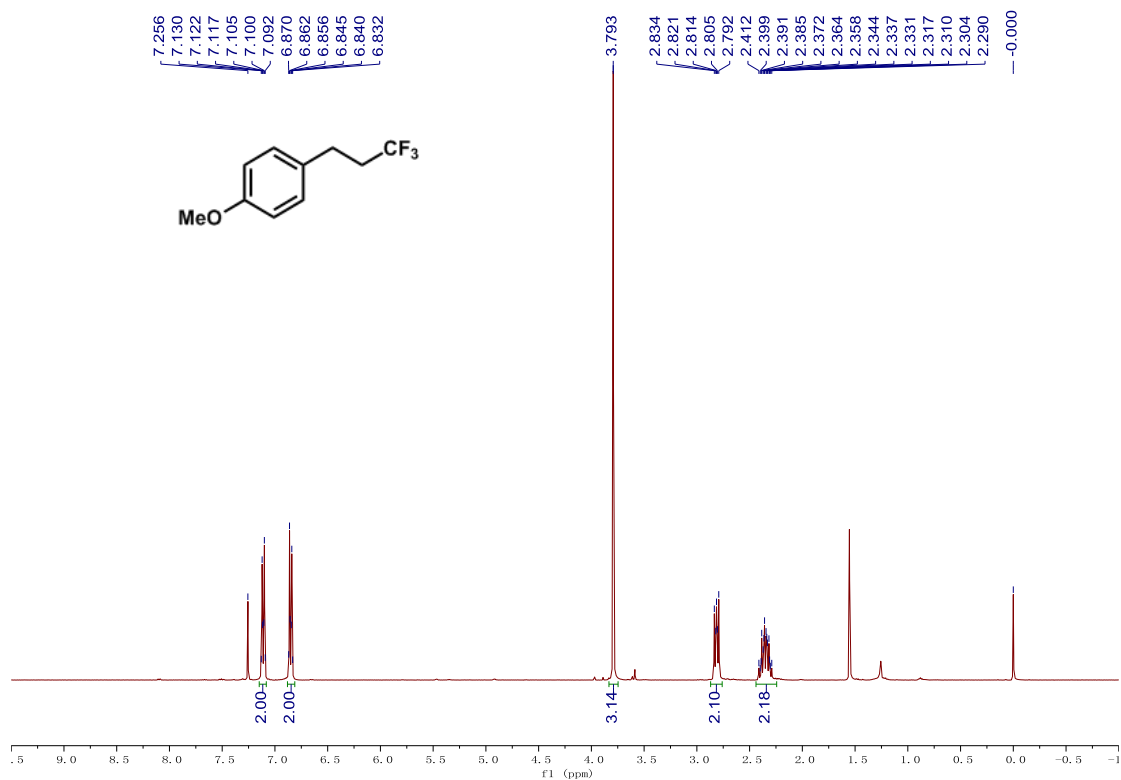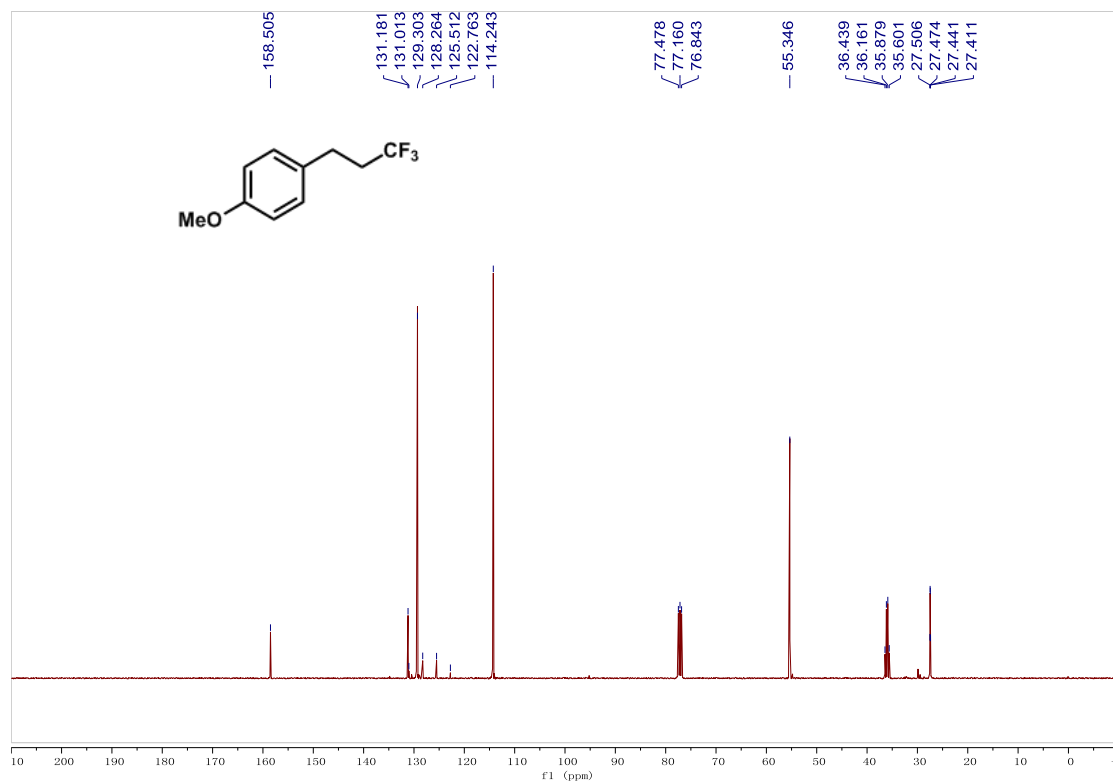

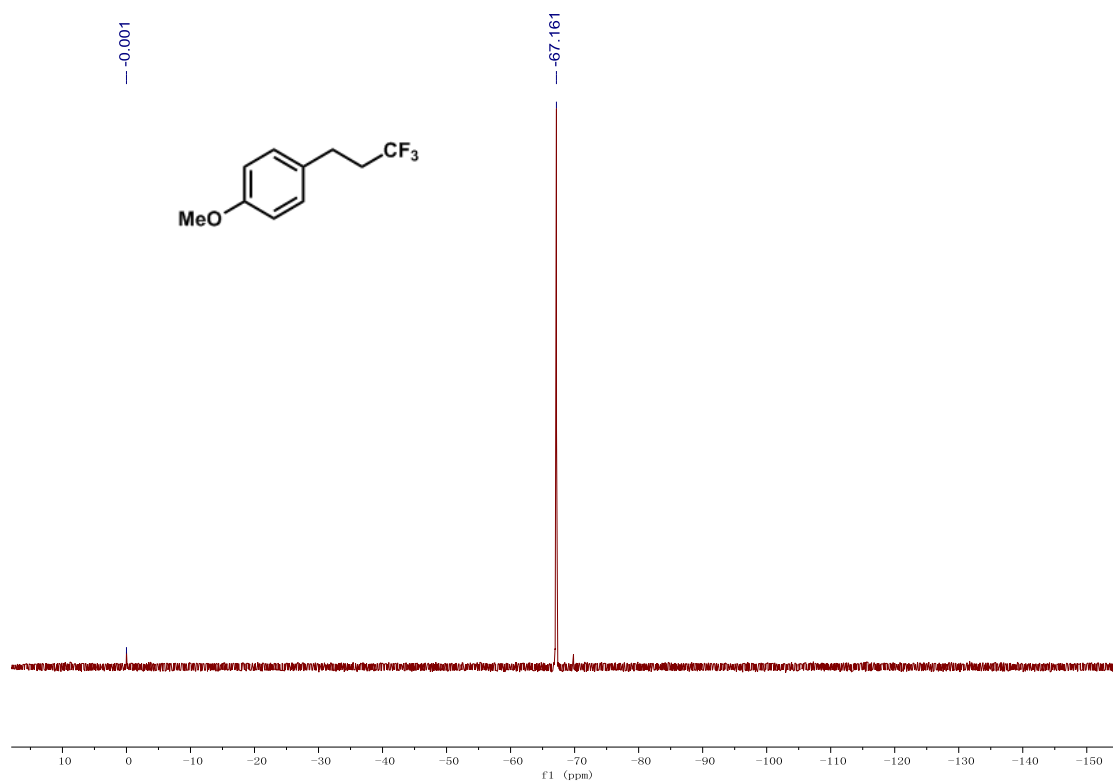

2-4

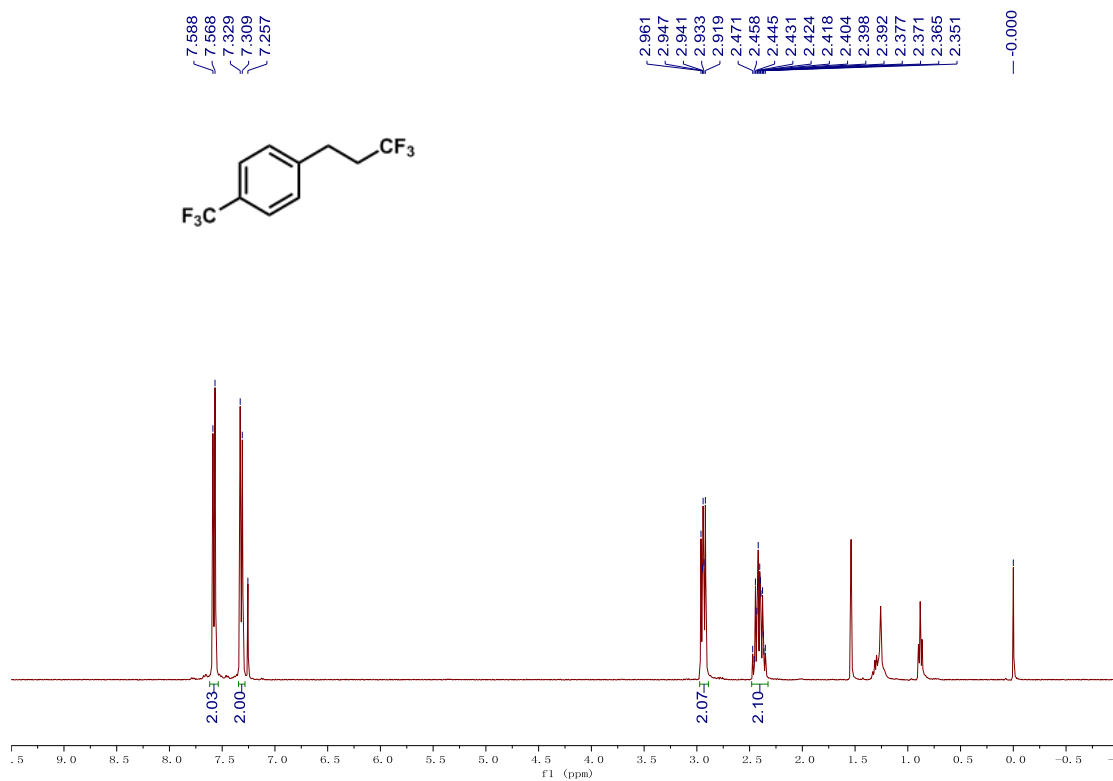

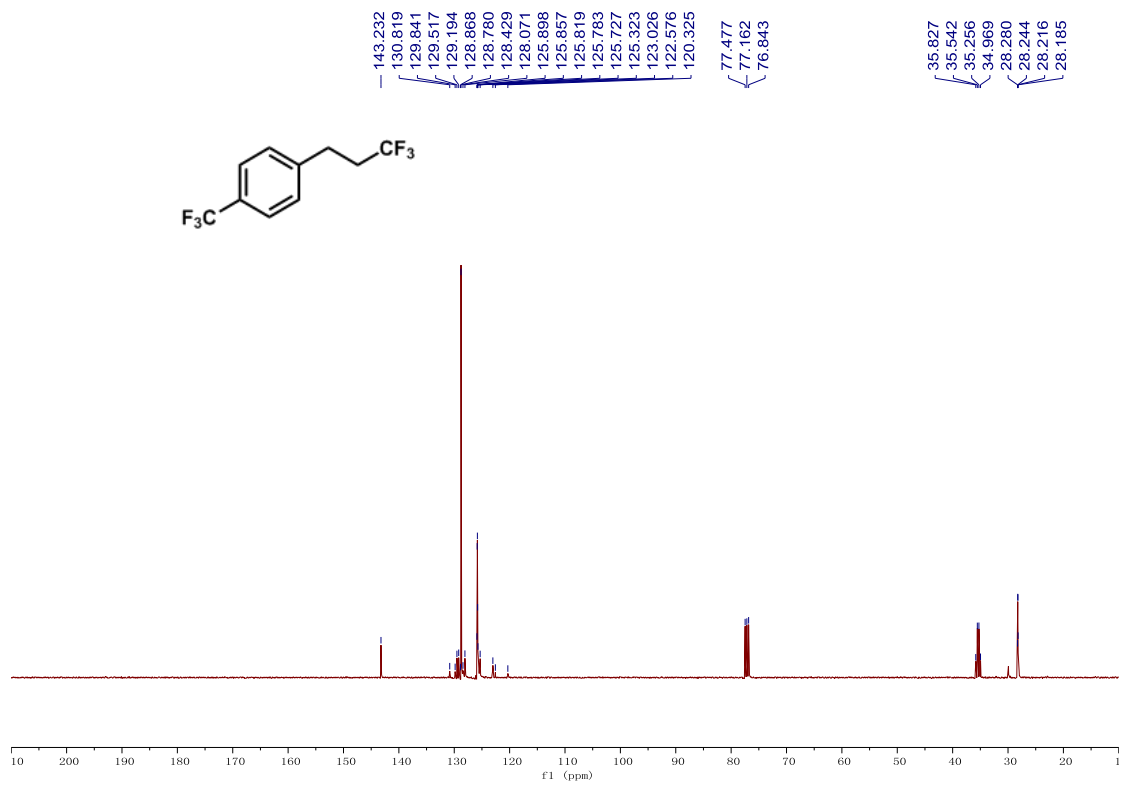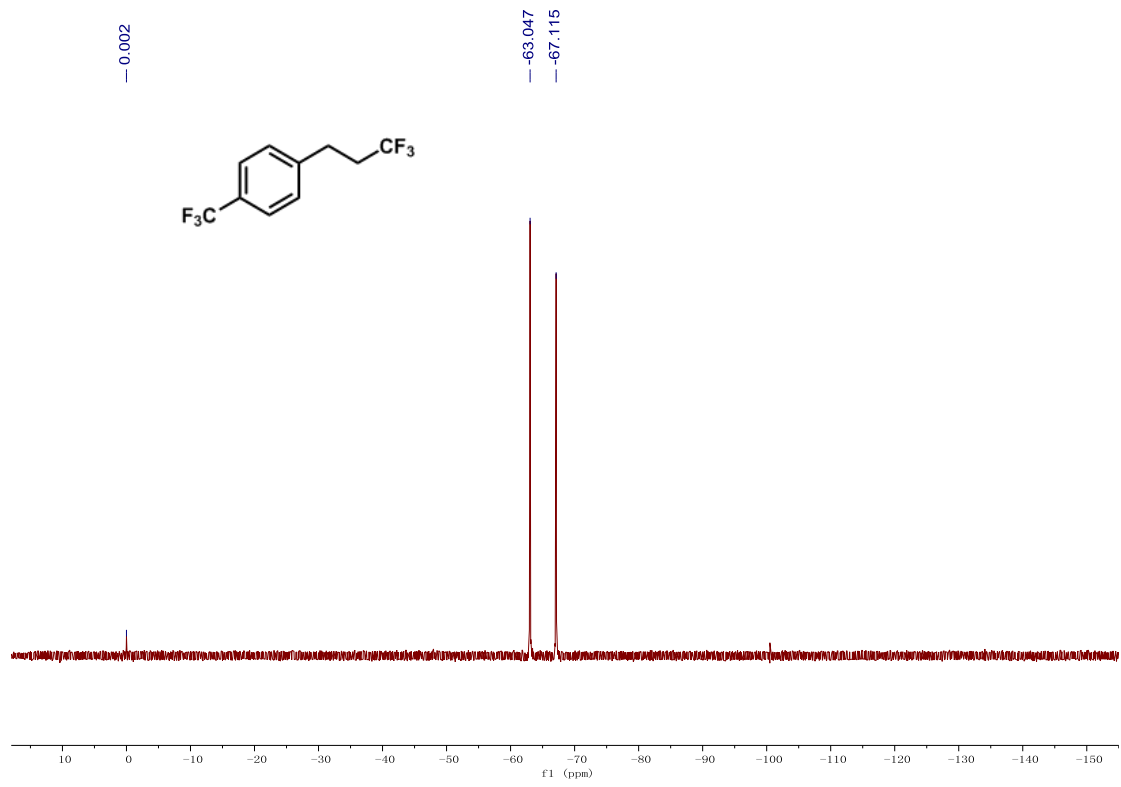

2-5

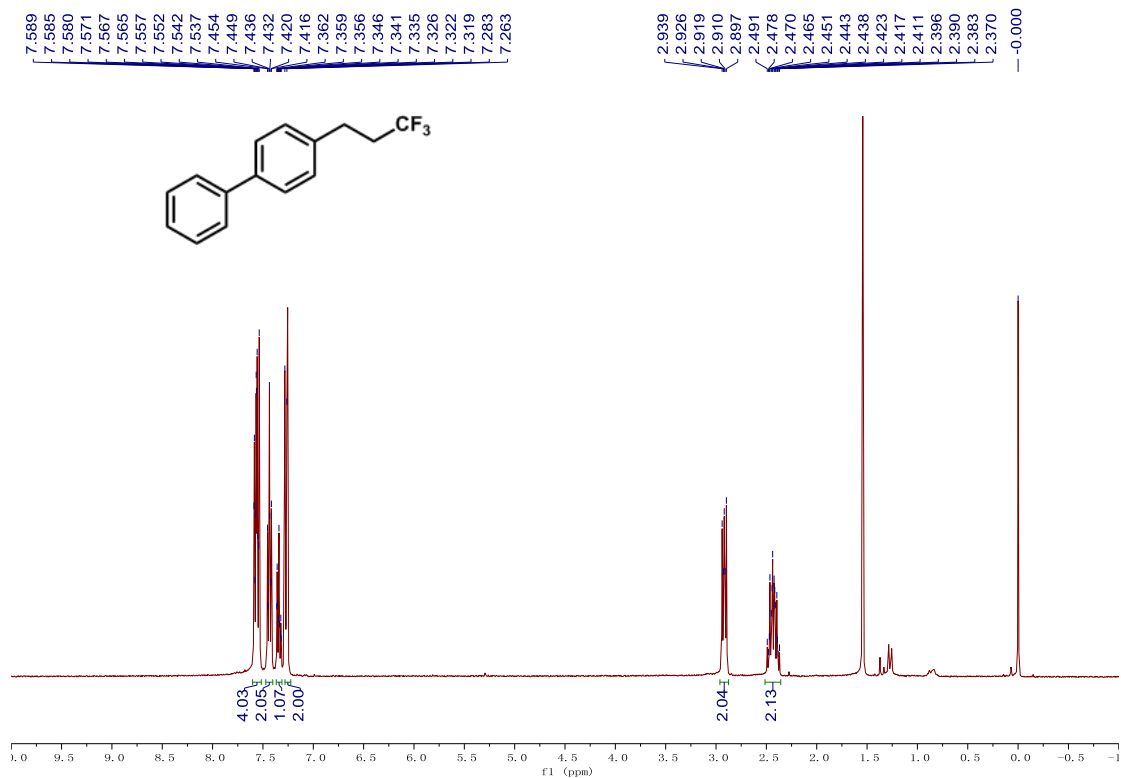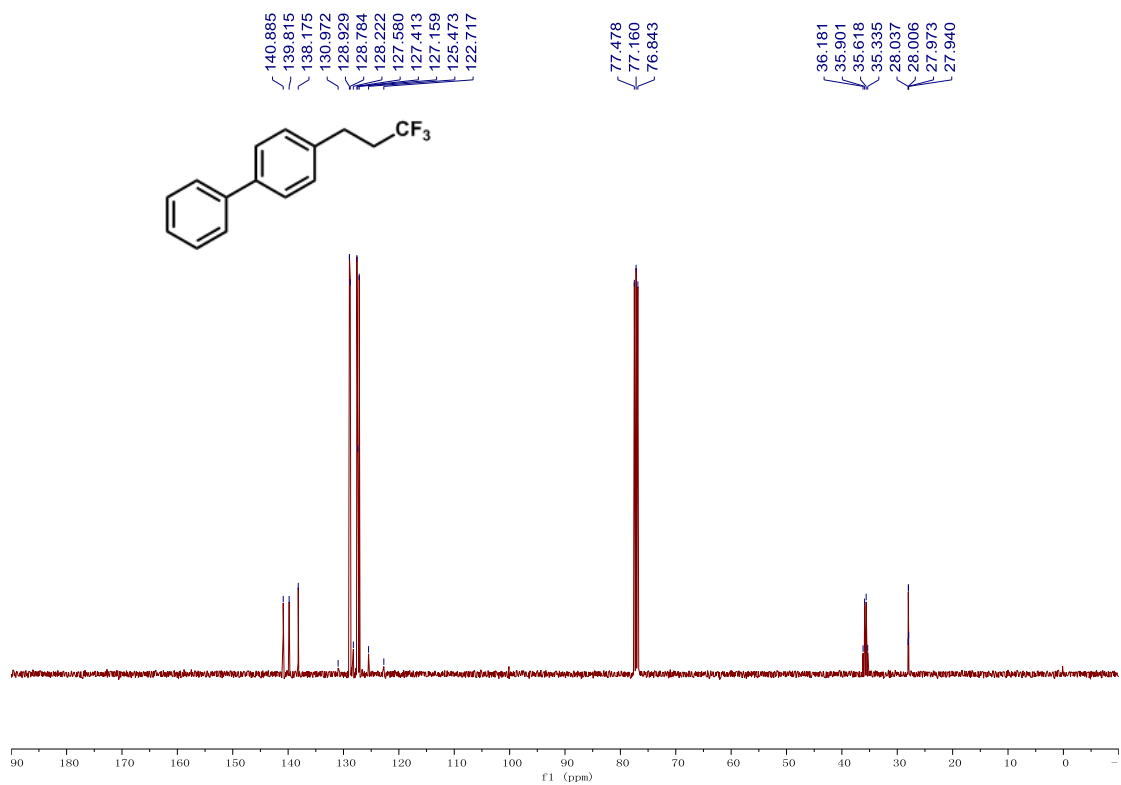

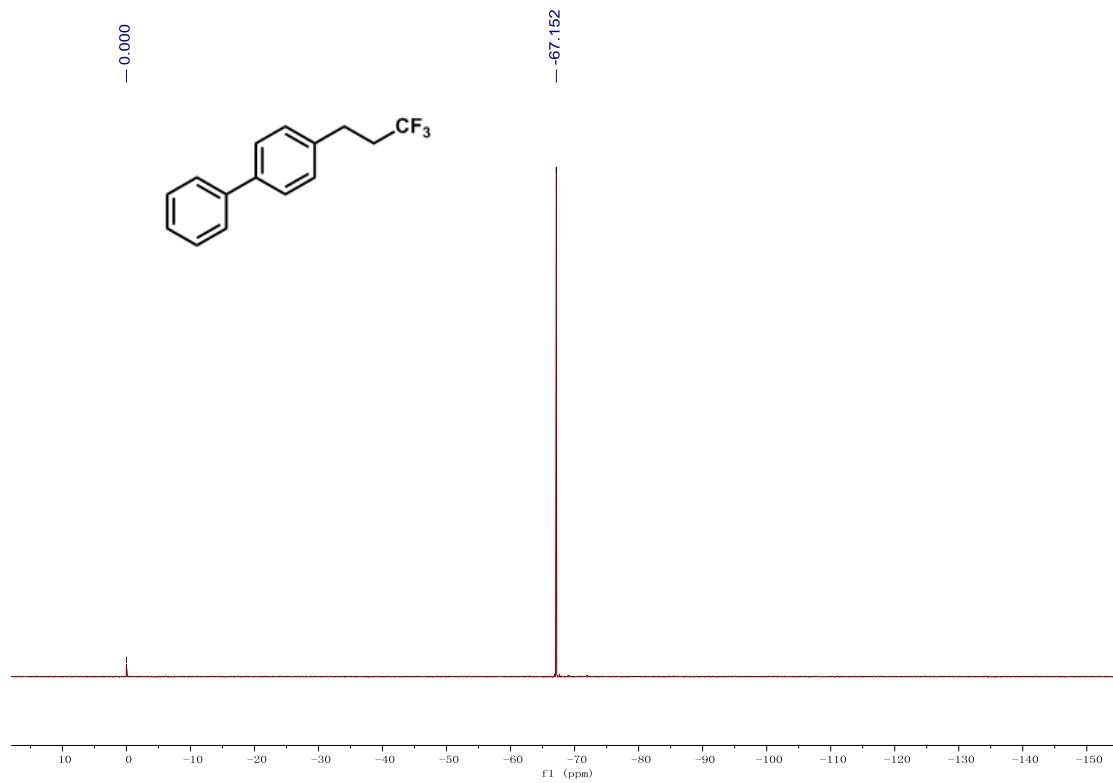

2-6

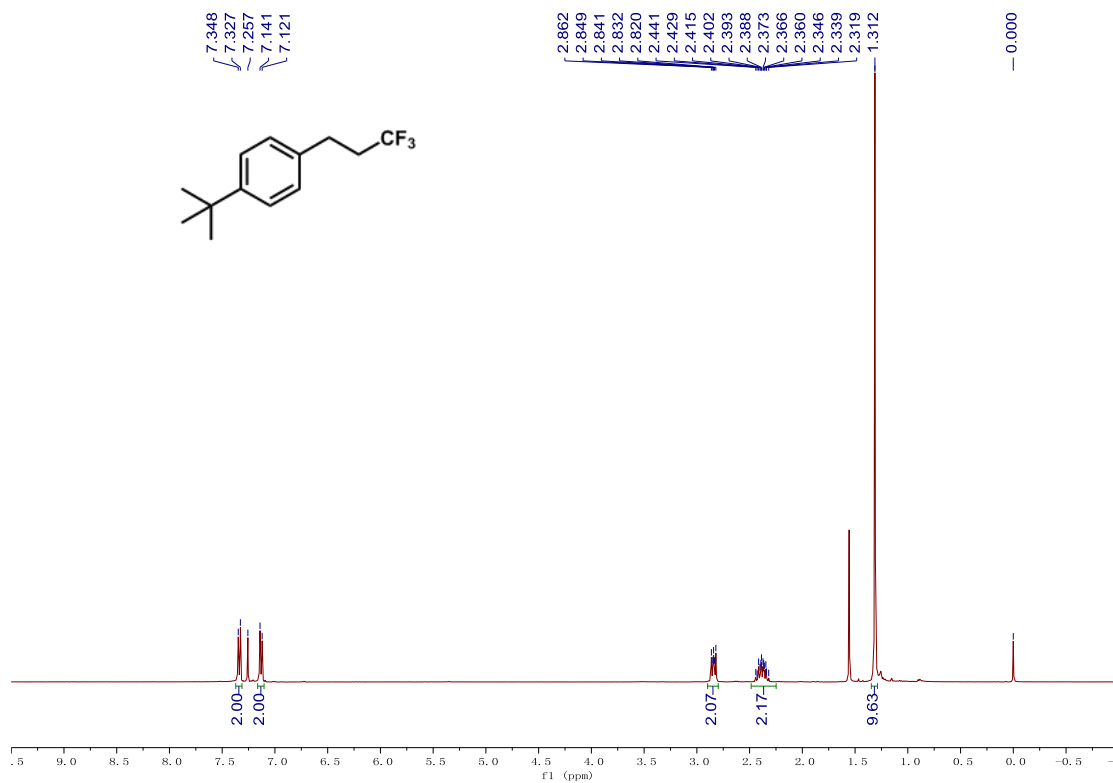



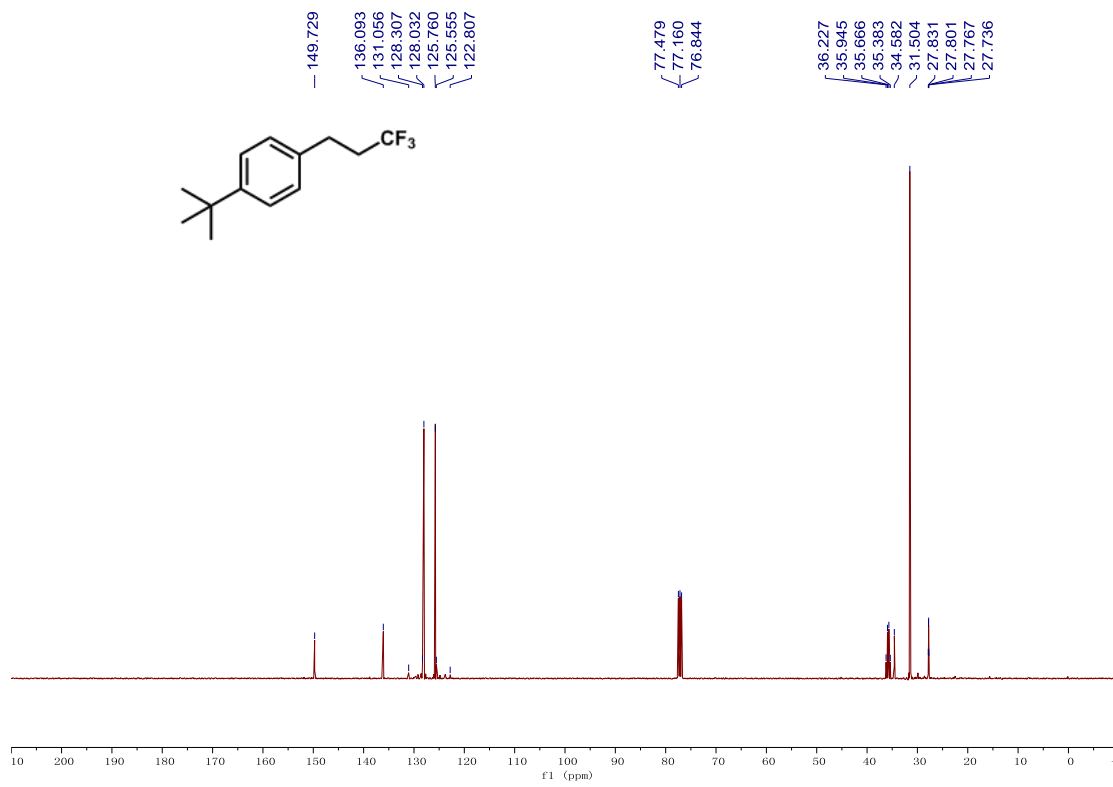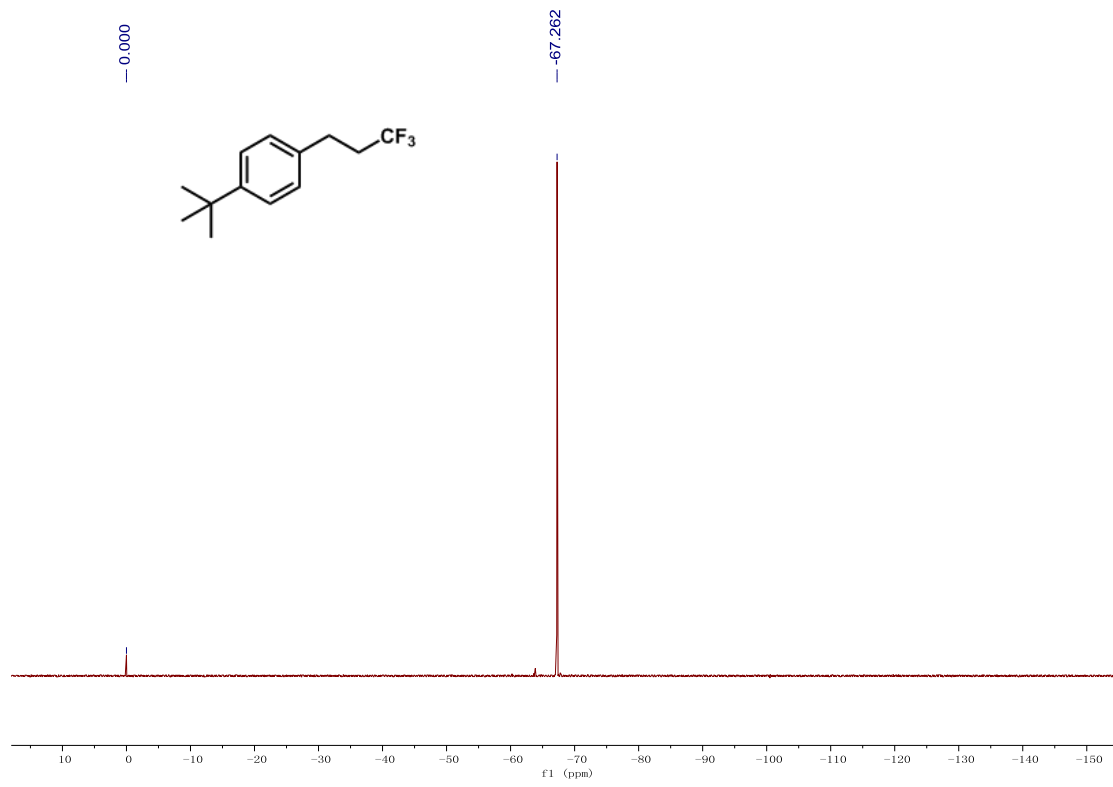

2-7

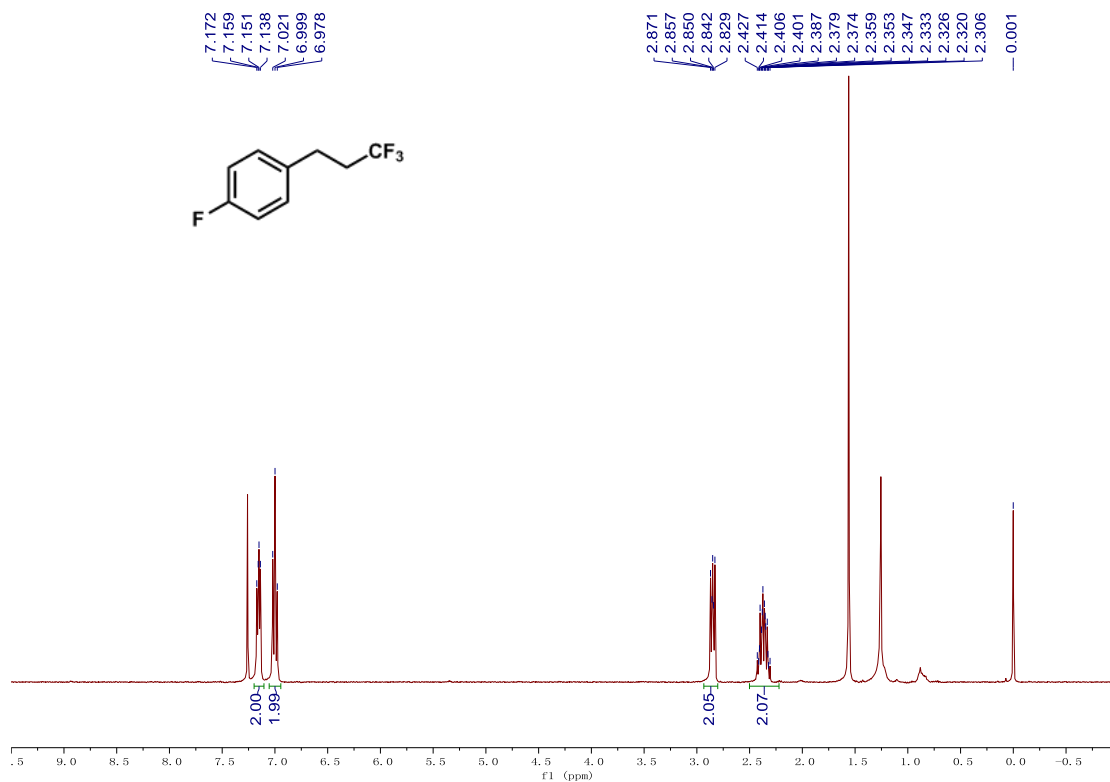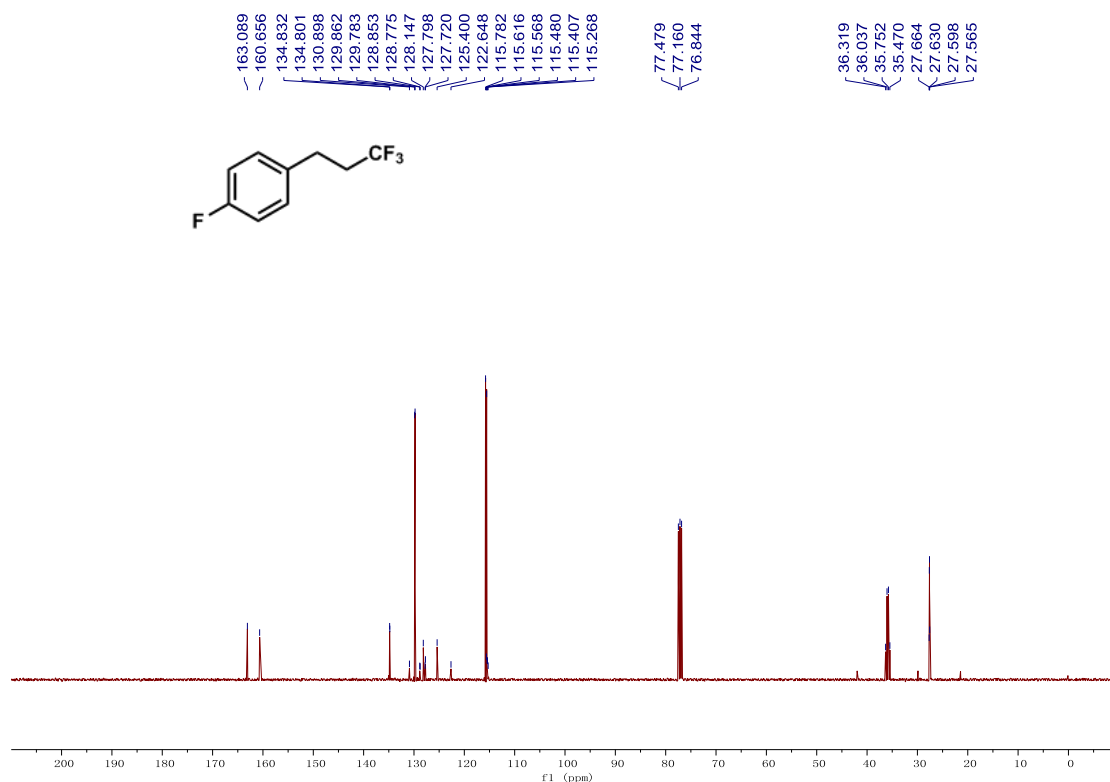

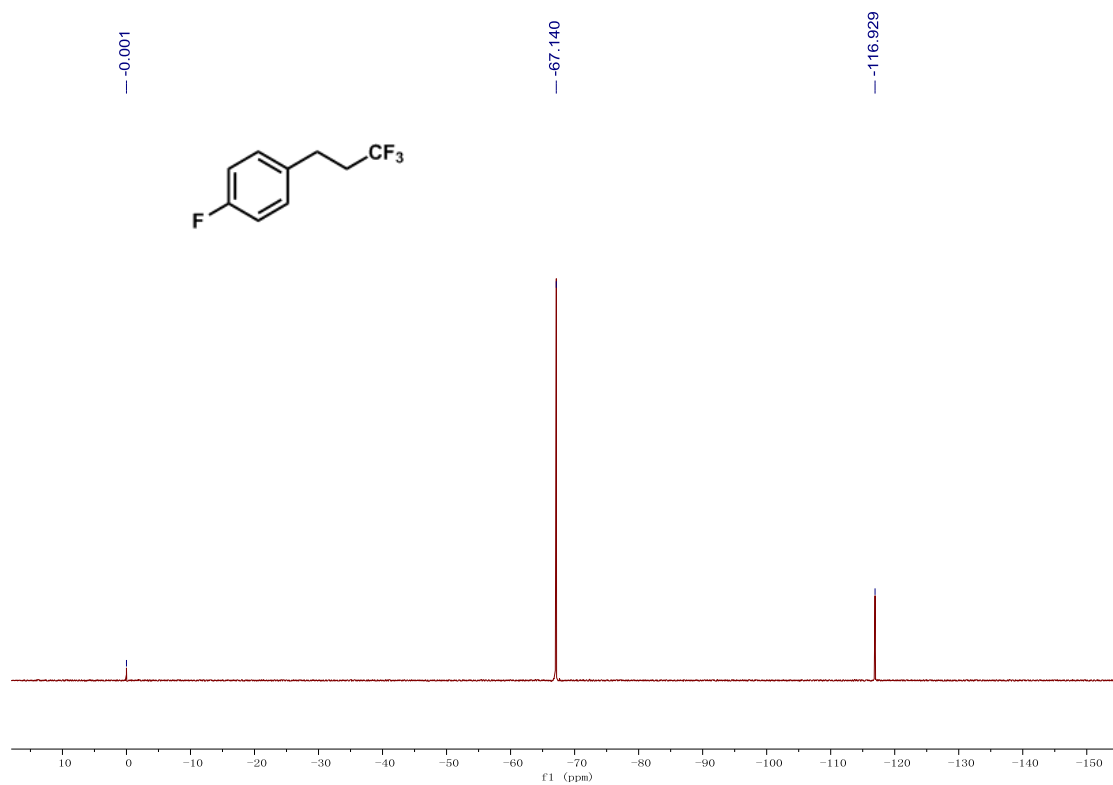

2-8

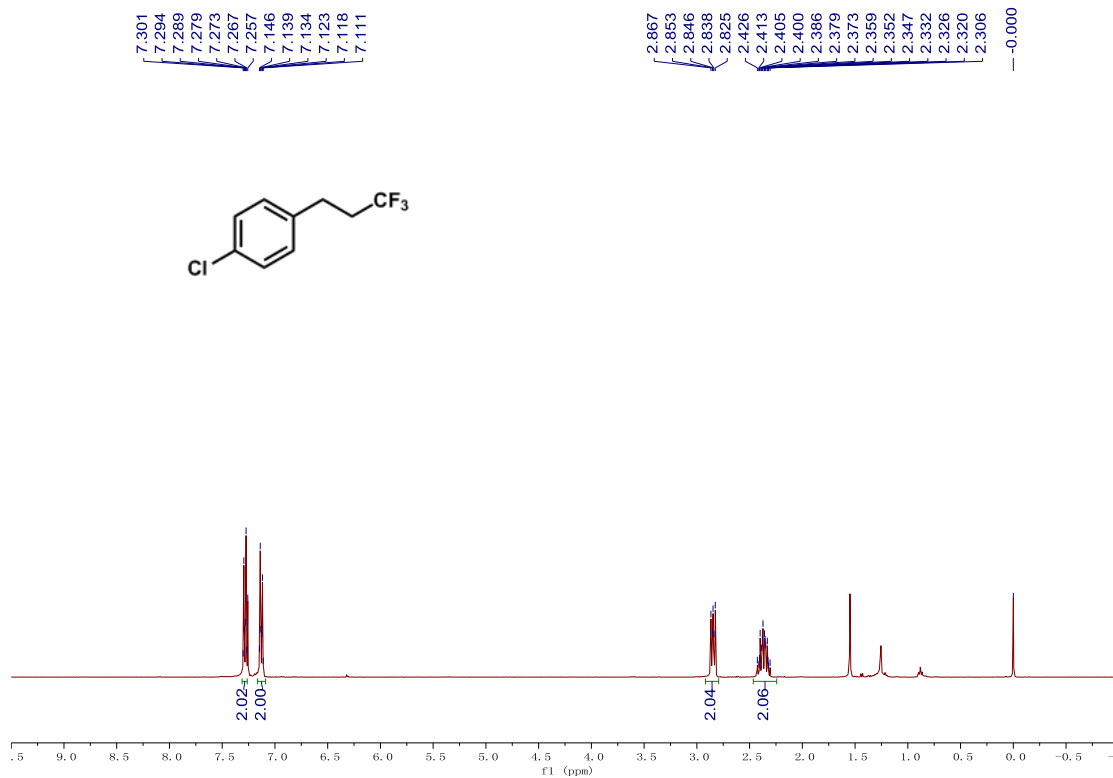

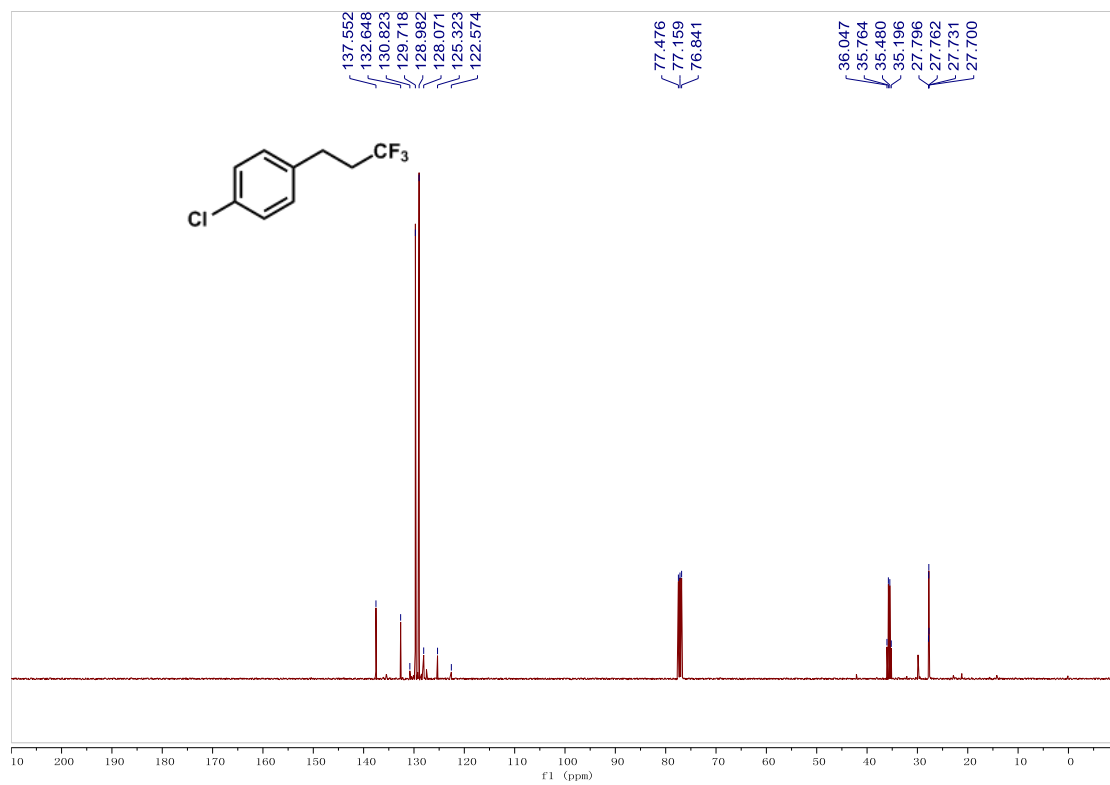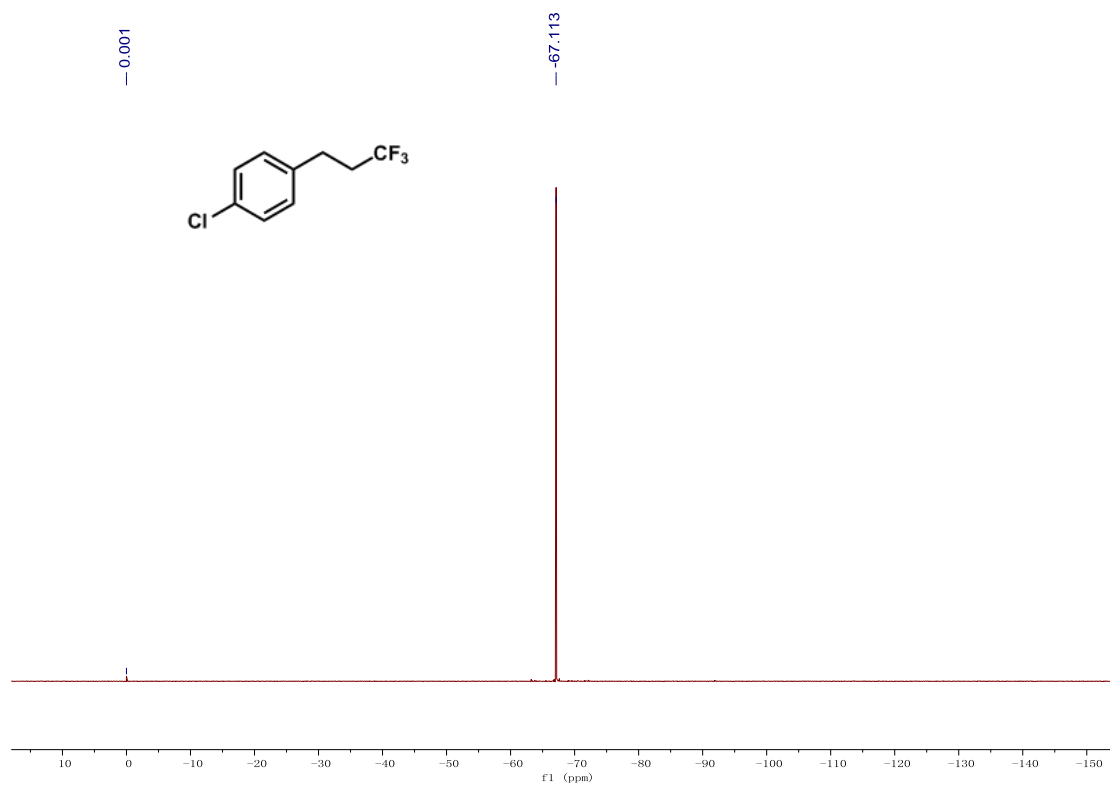

2-9

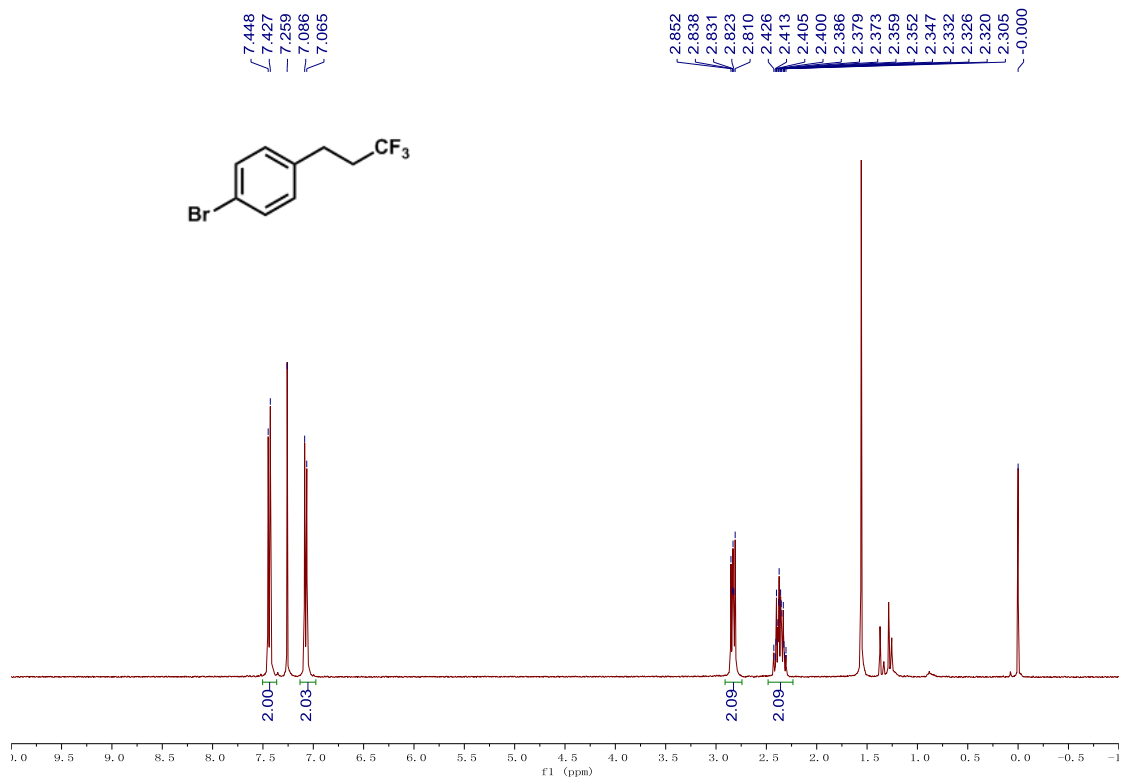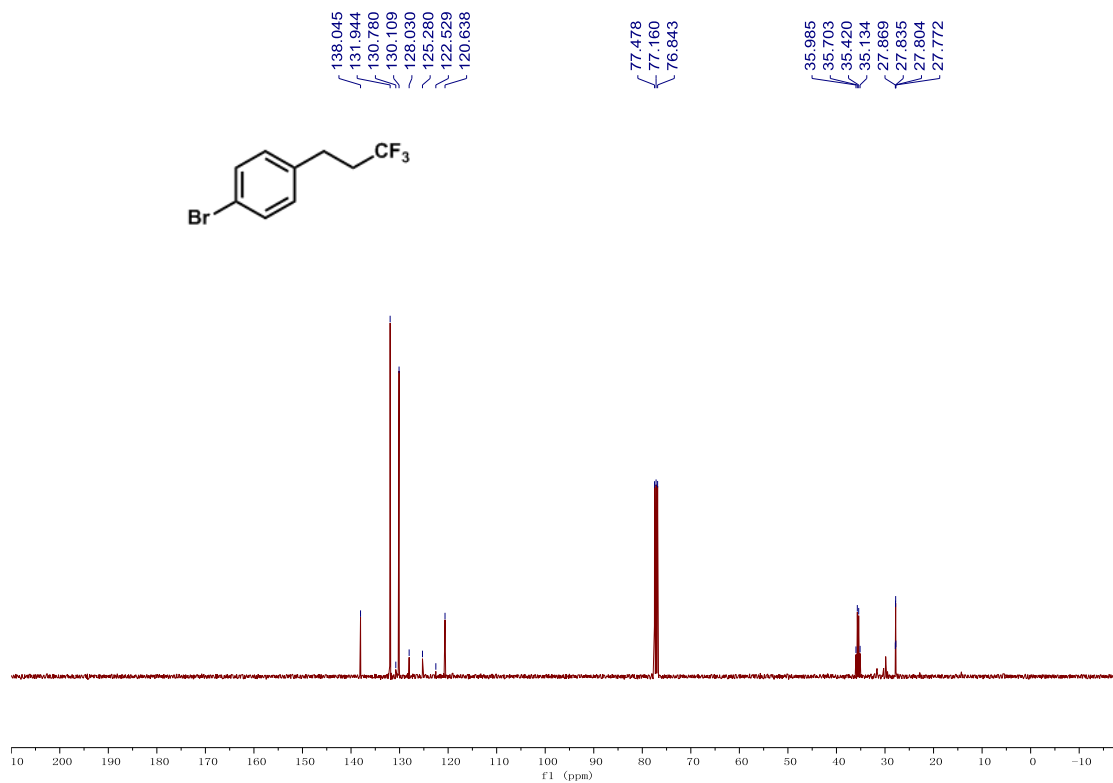

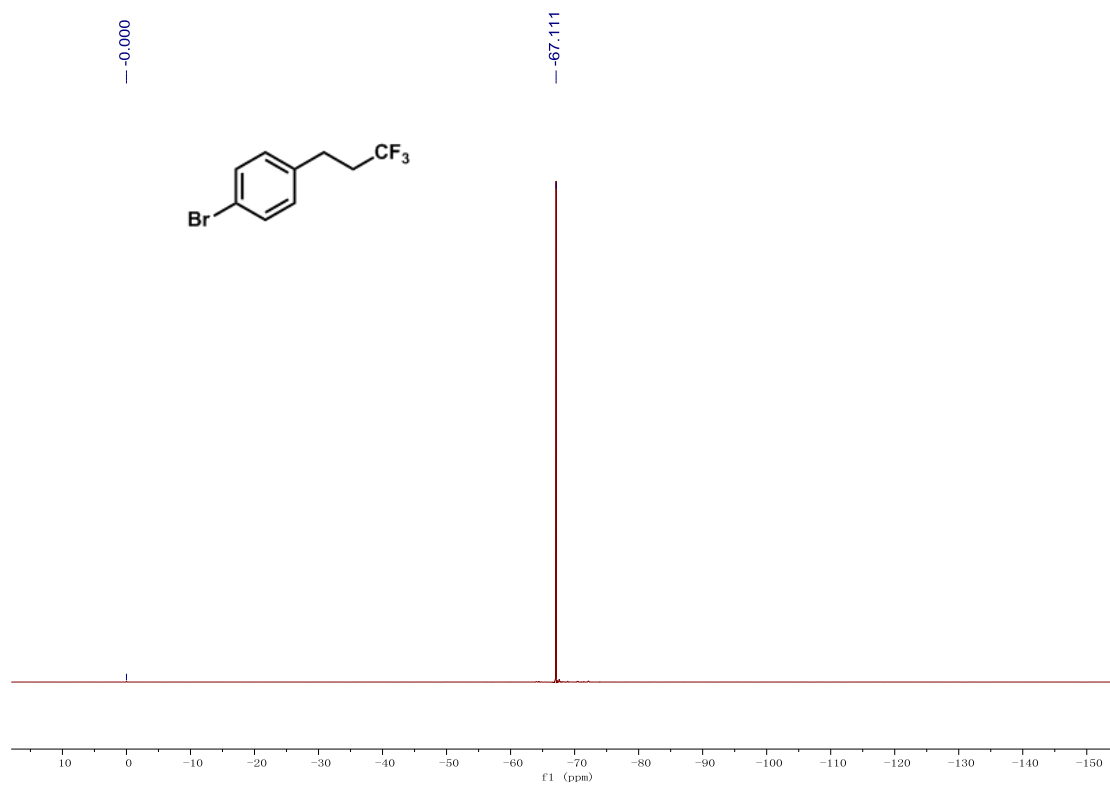

2-10

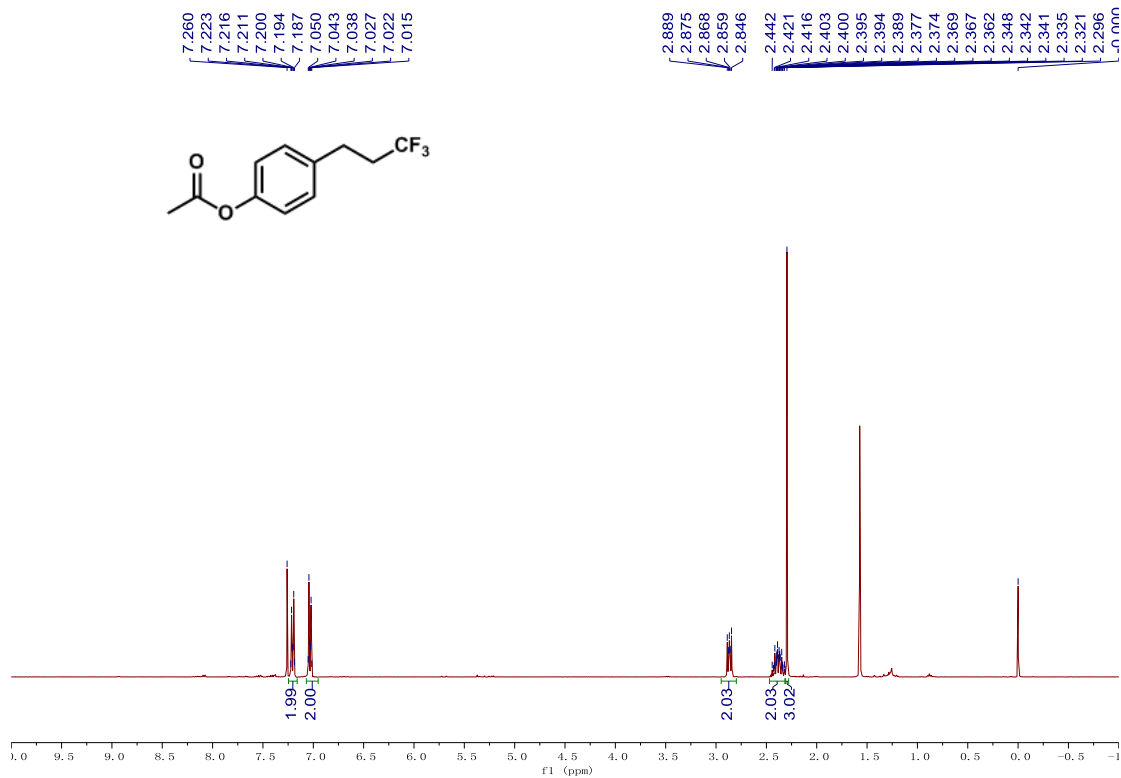

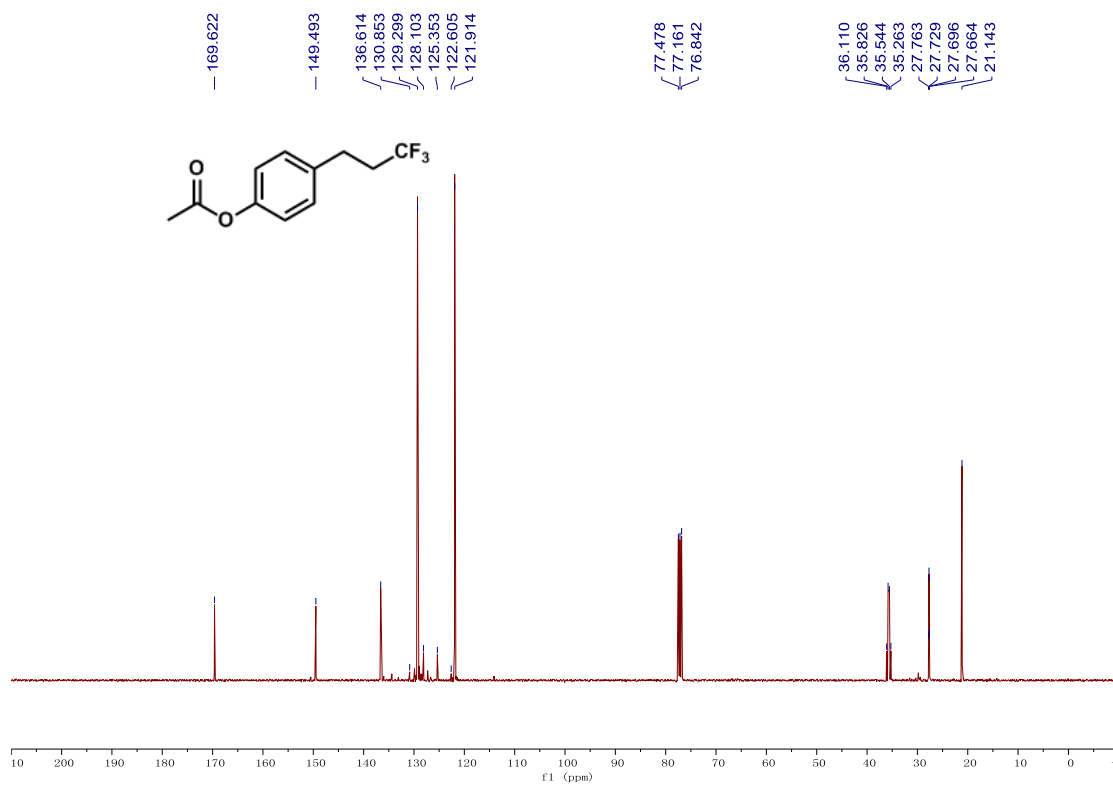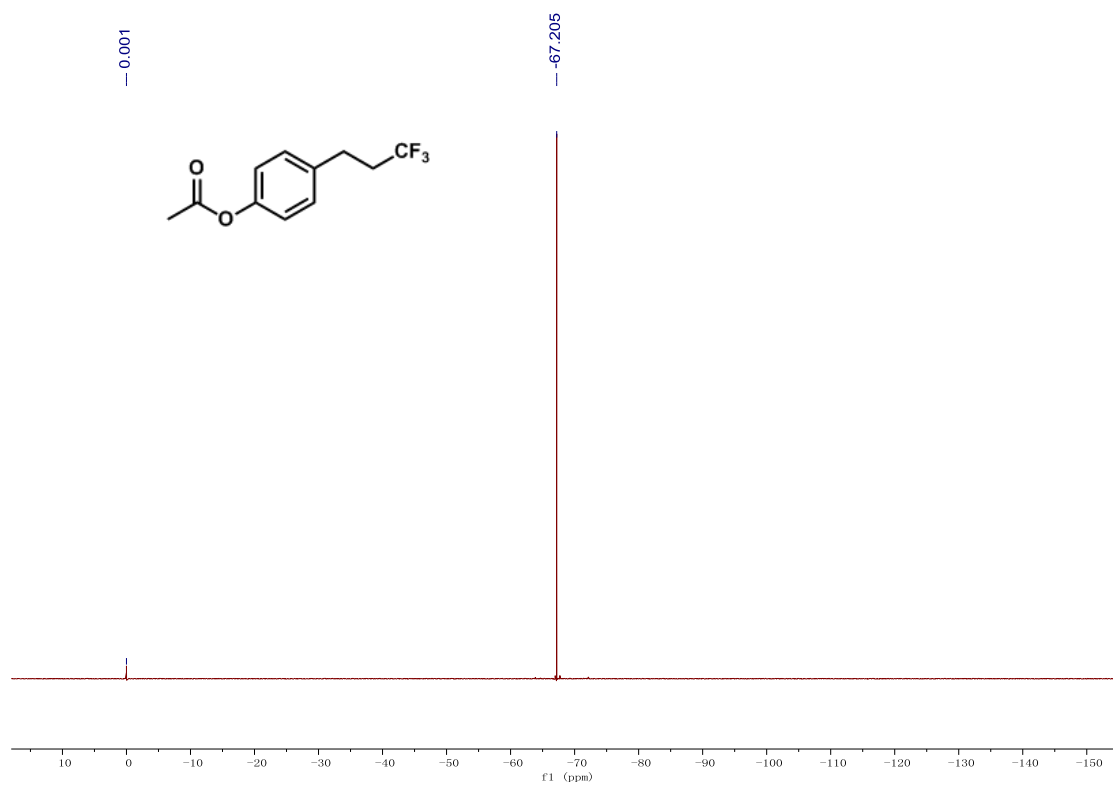

2-11

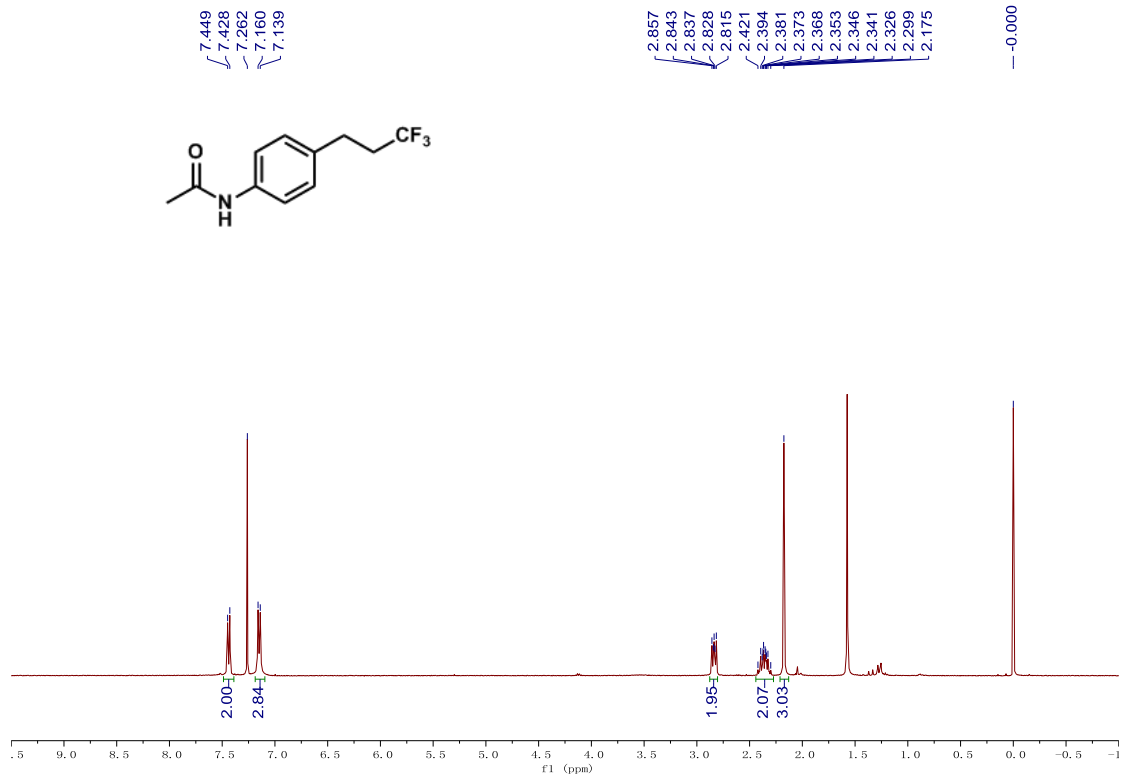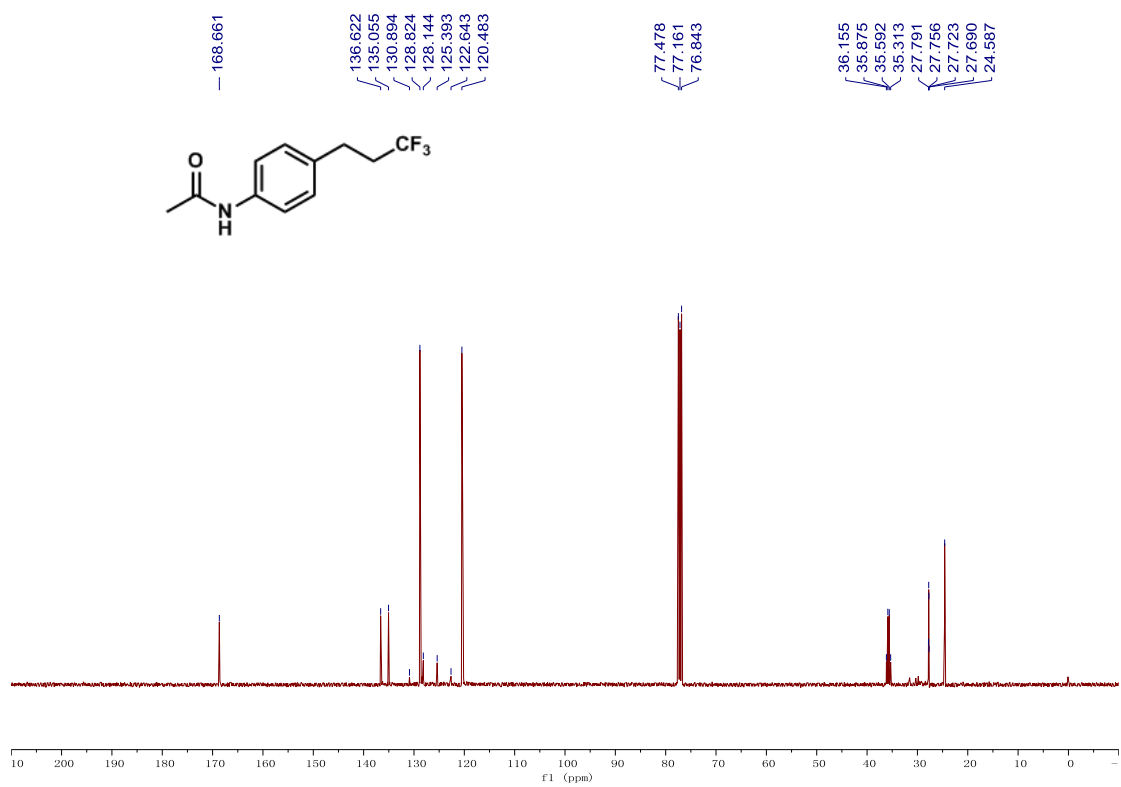



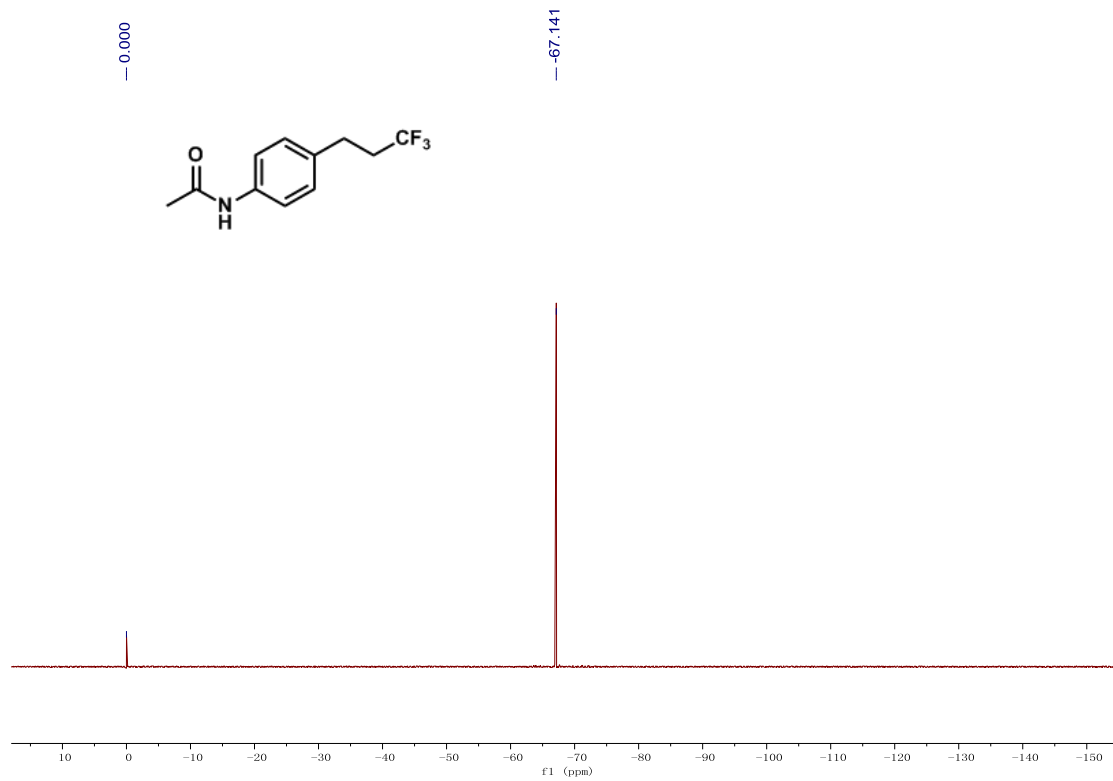

2-12

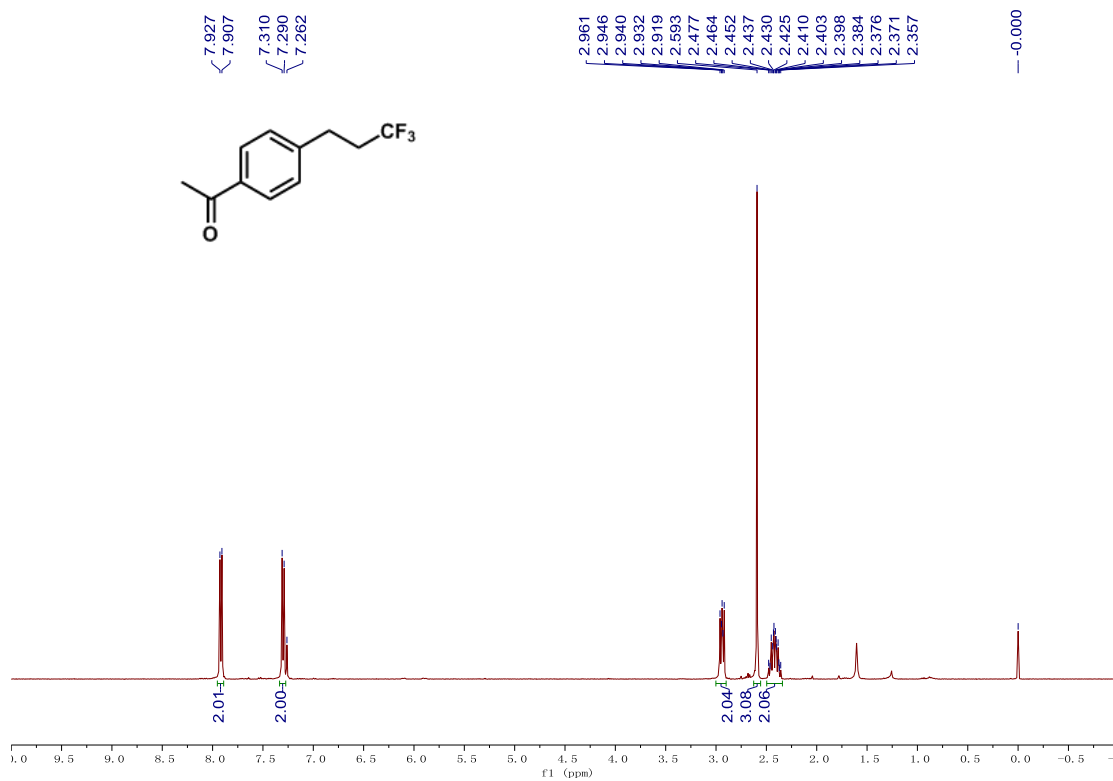

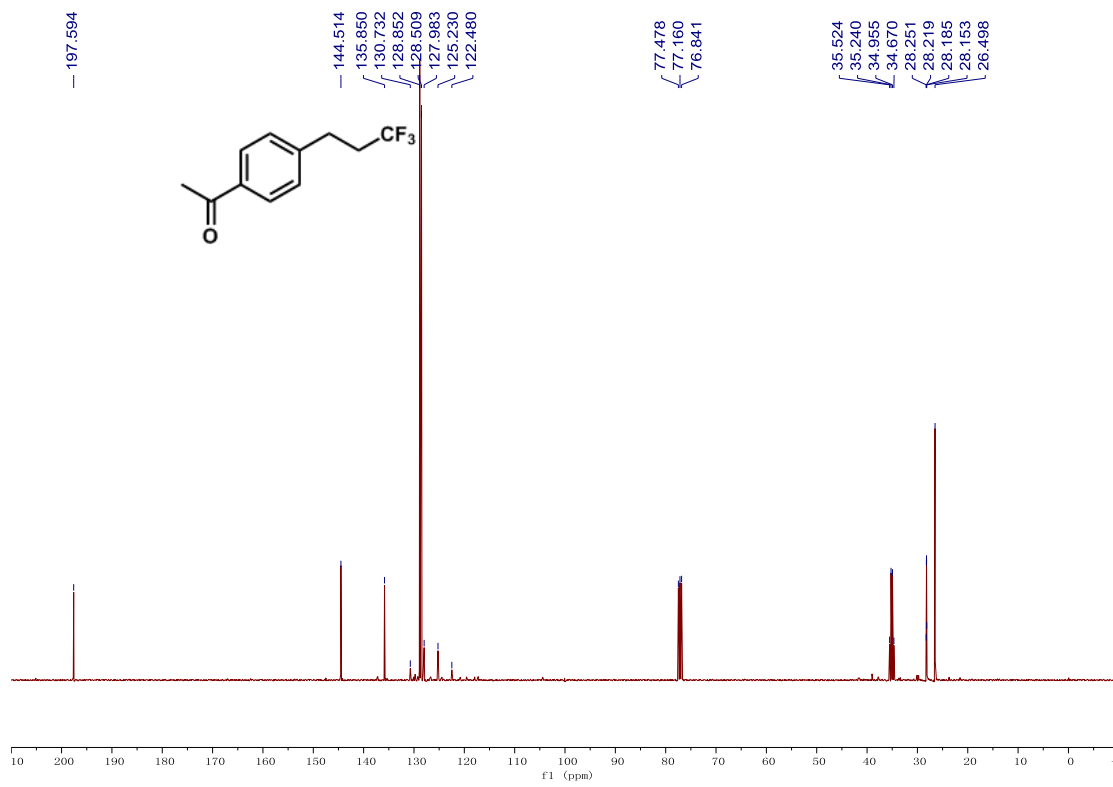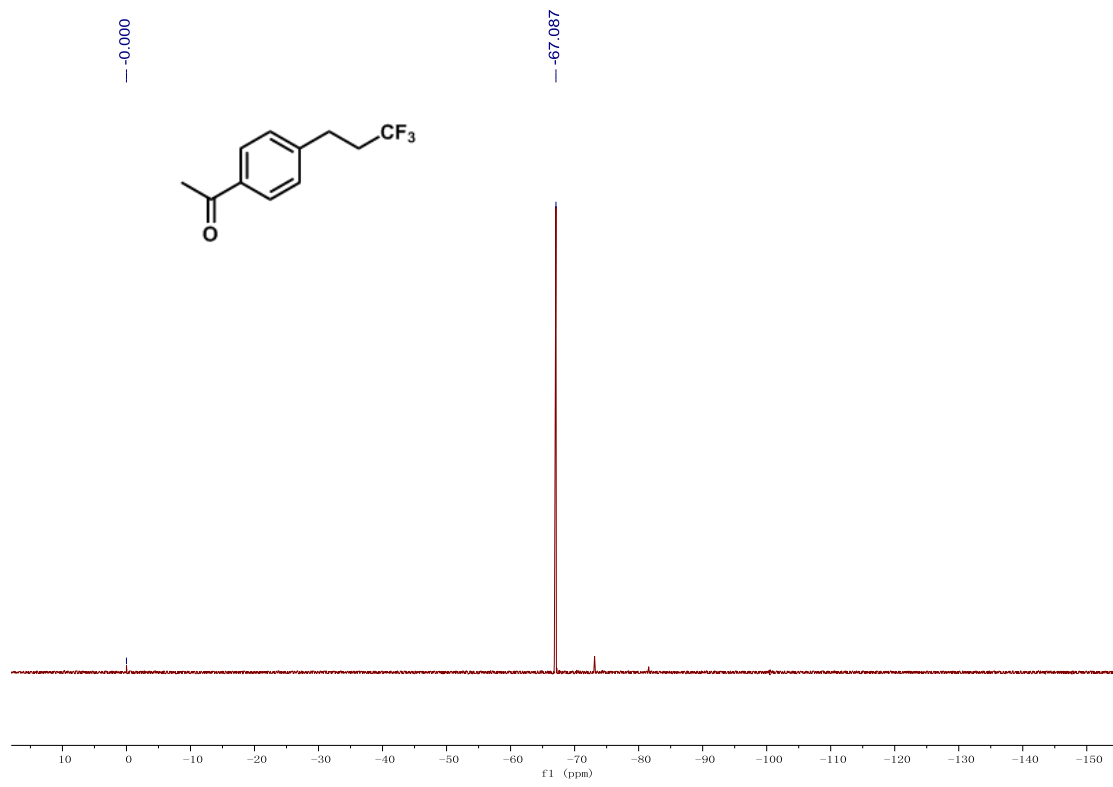

2-13

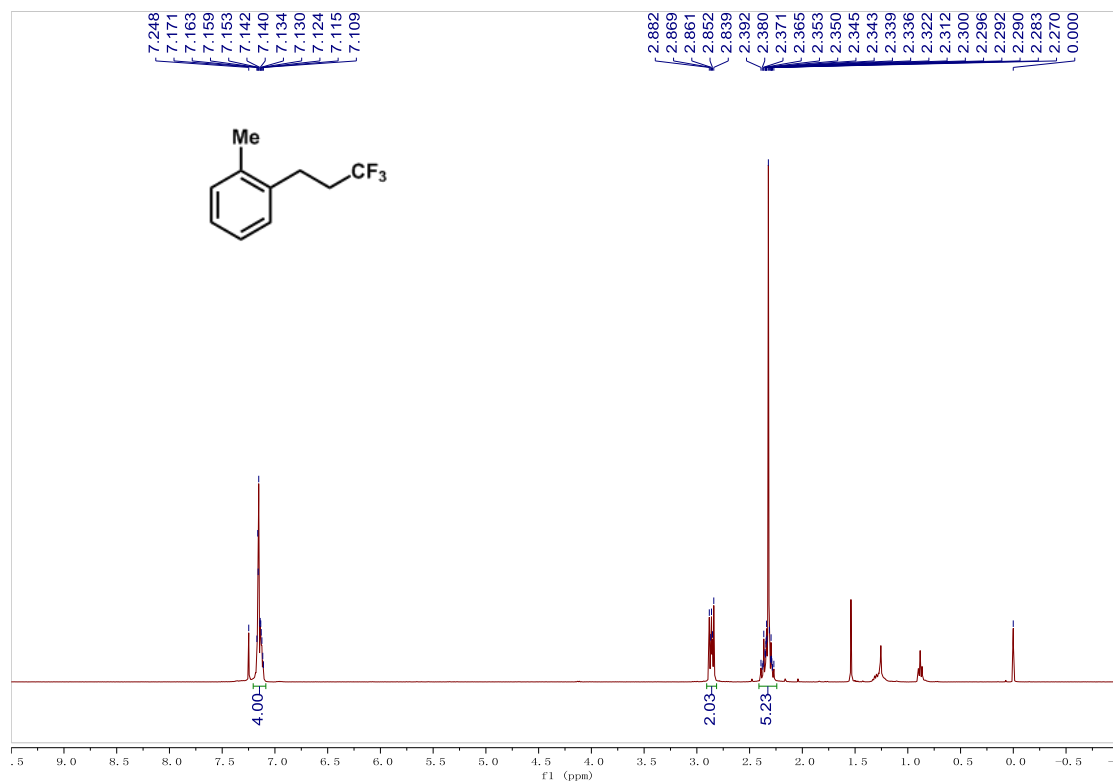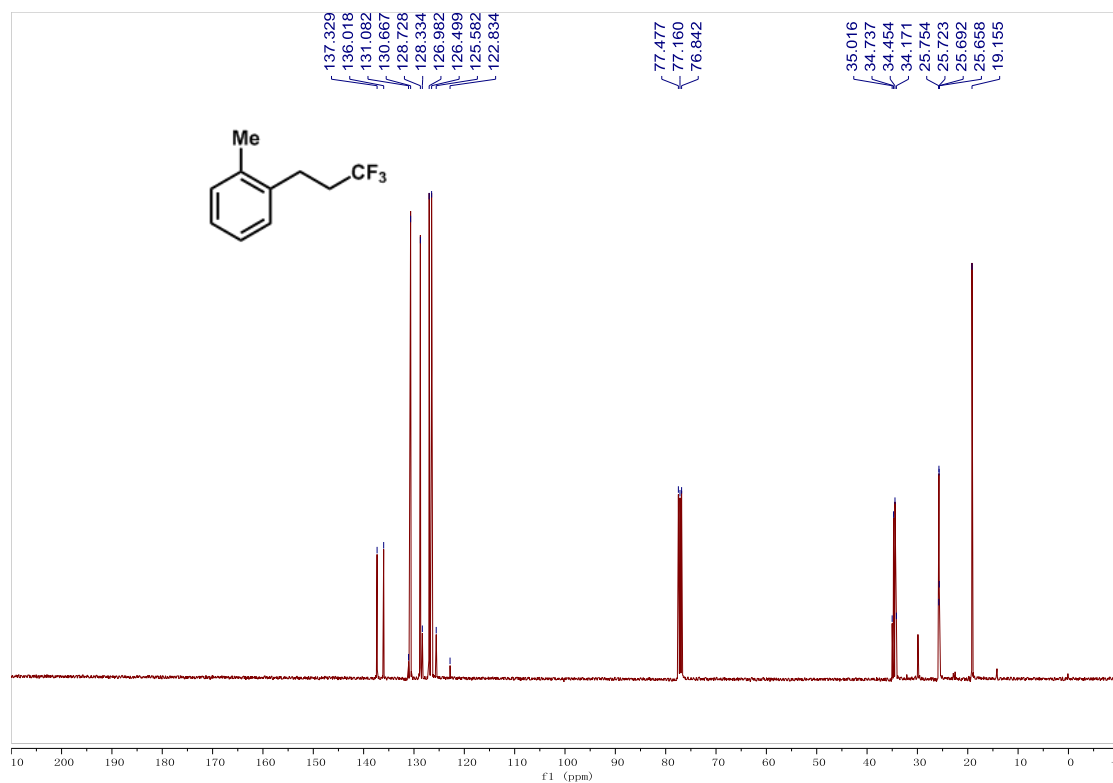

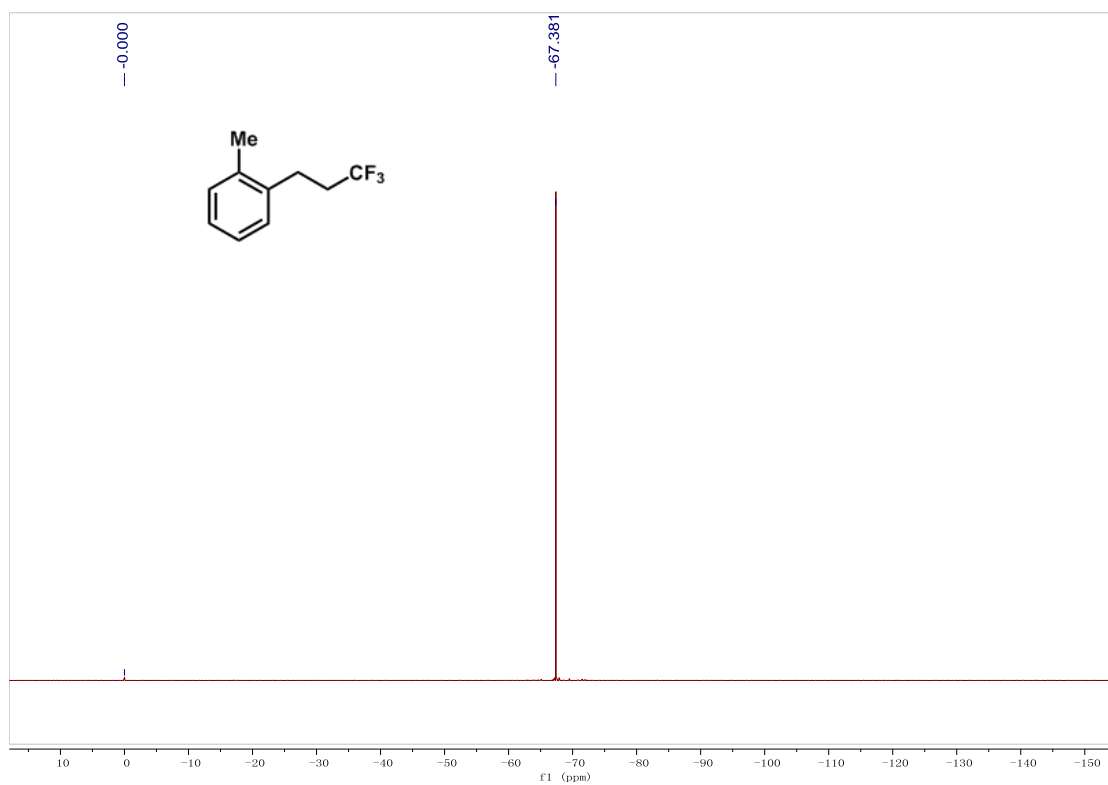

2-14

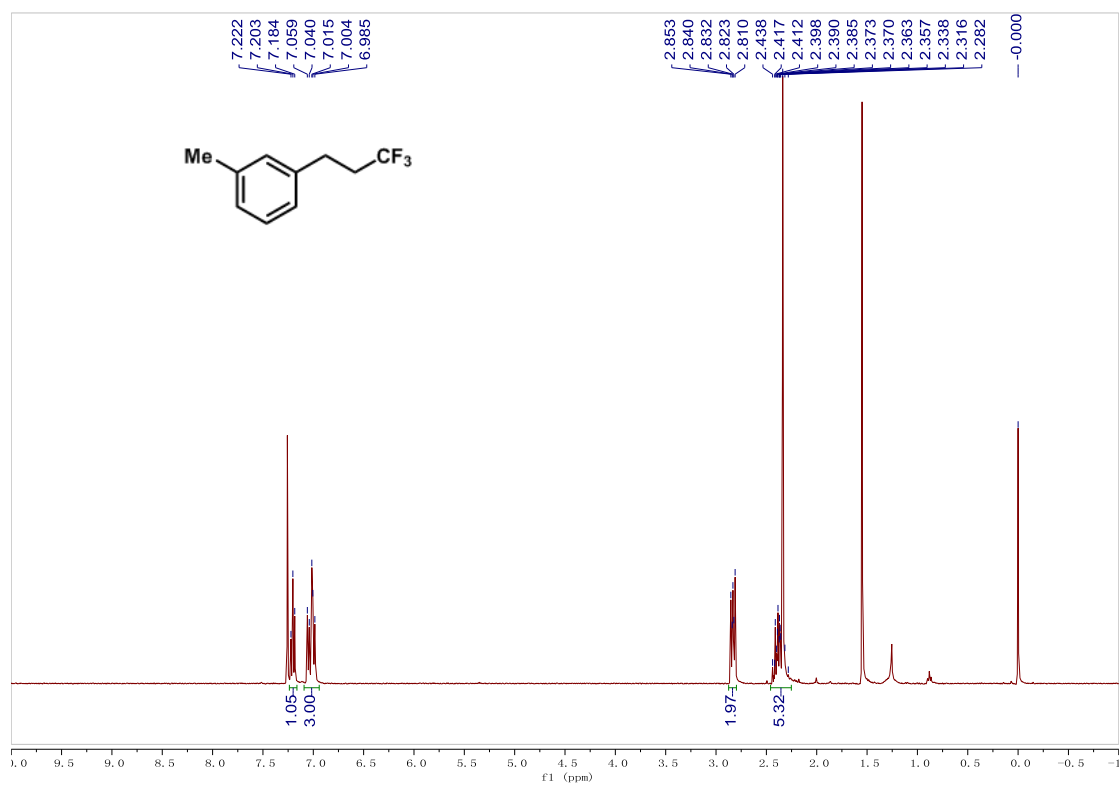

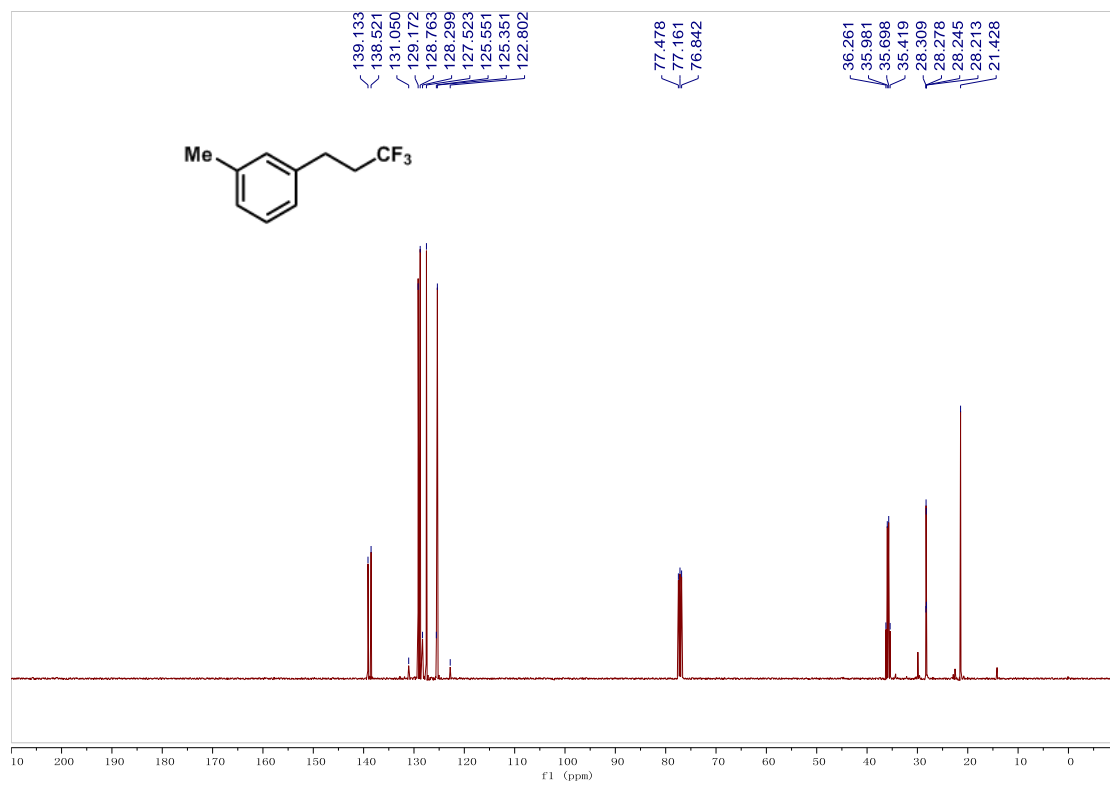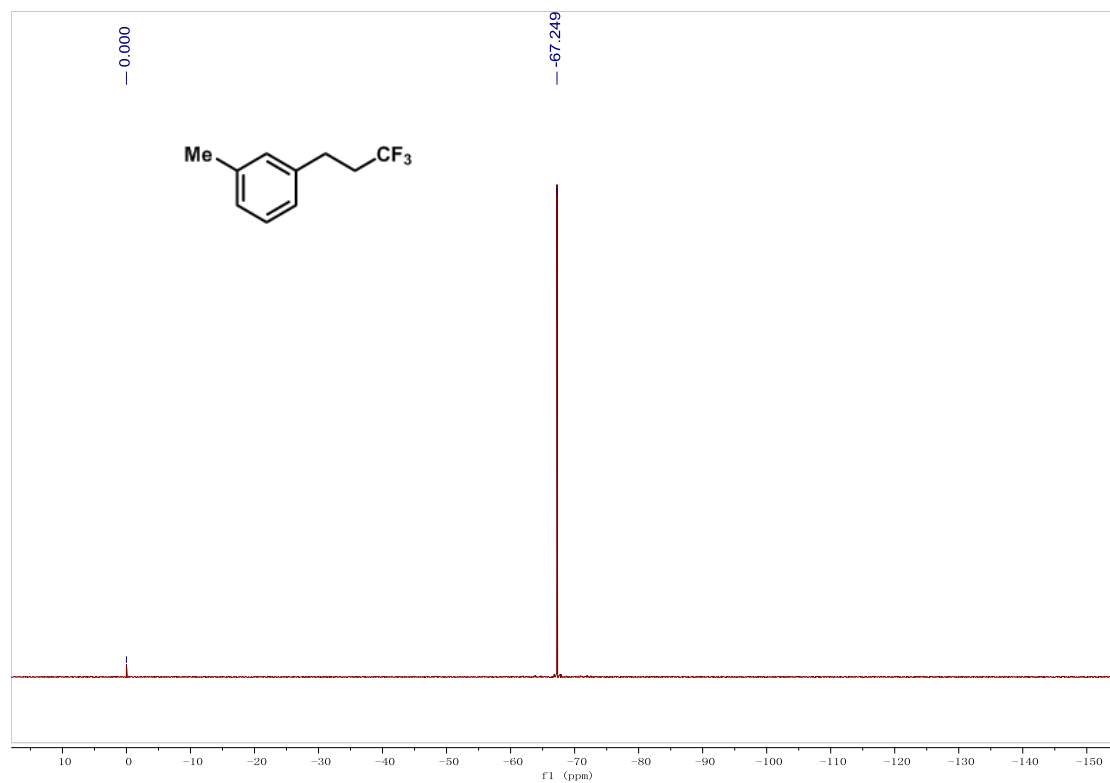

2-15

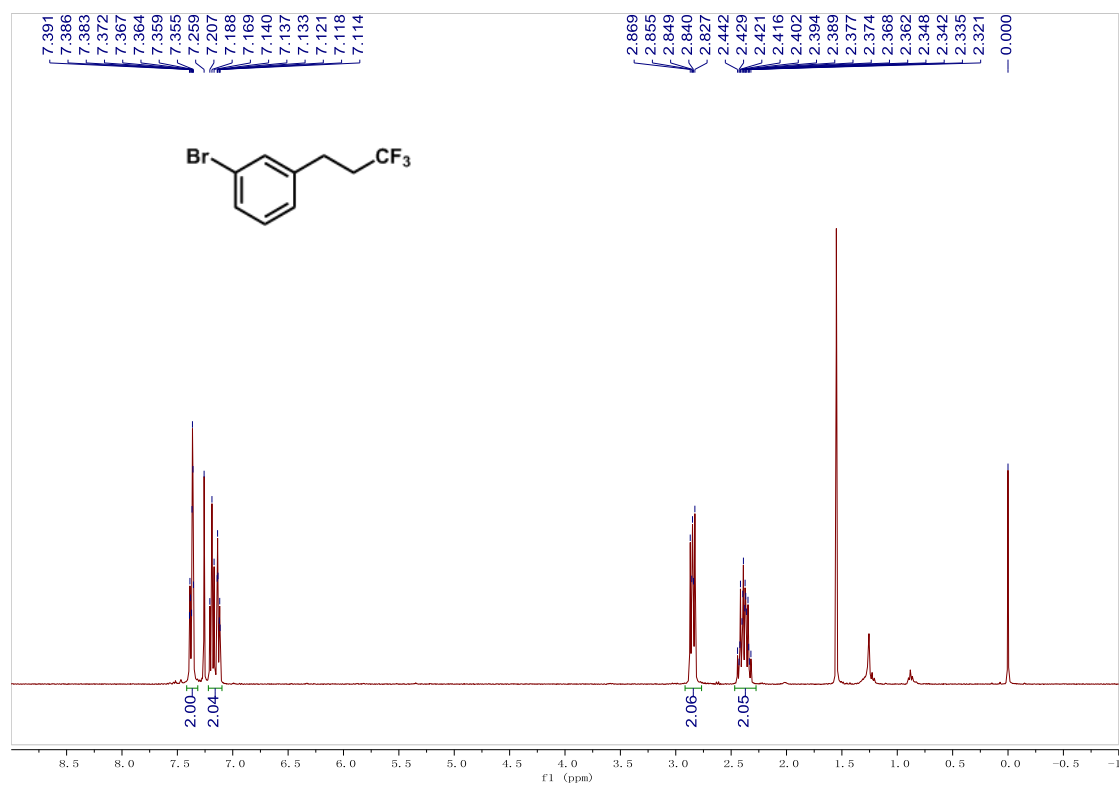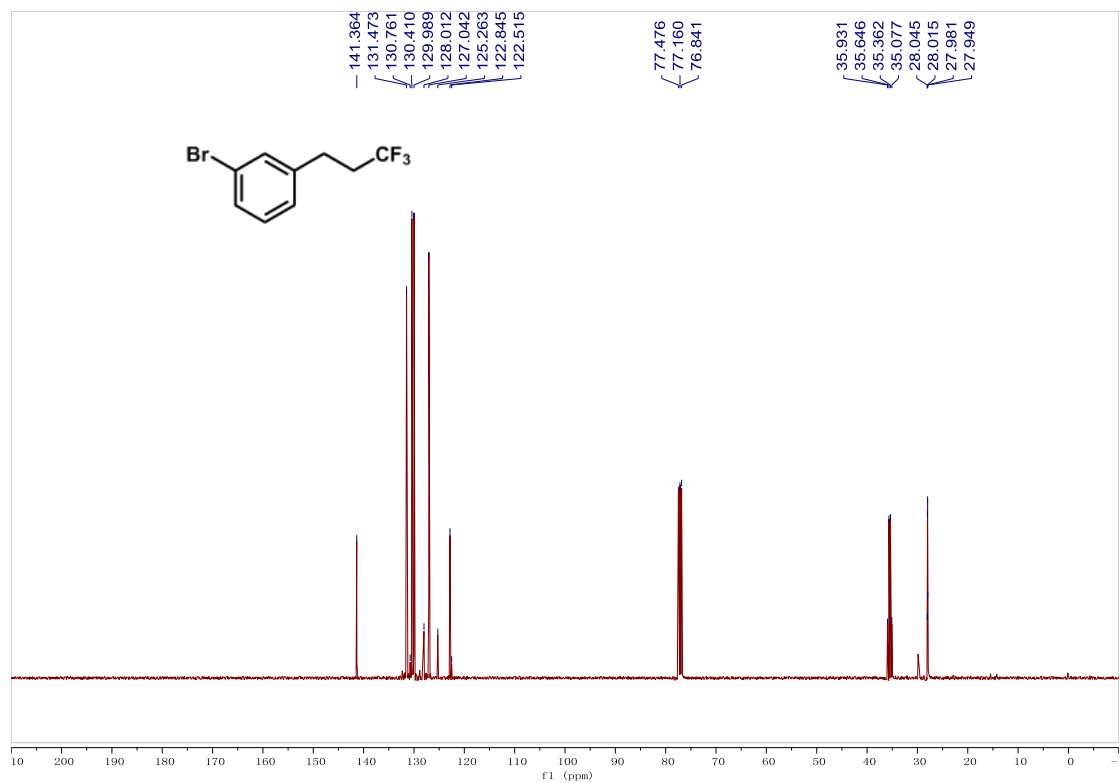

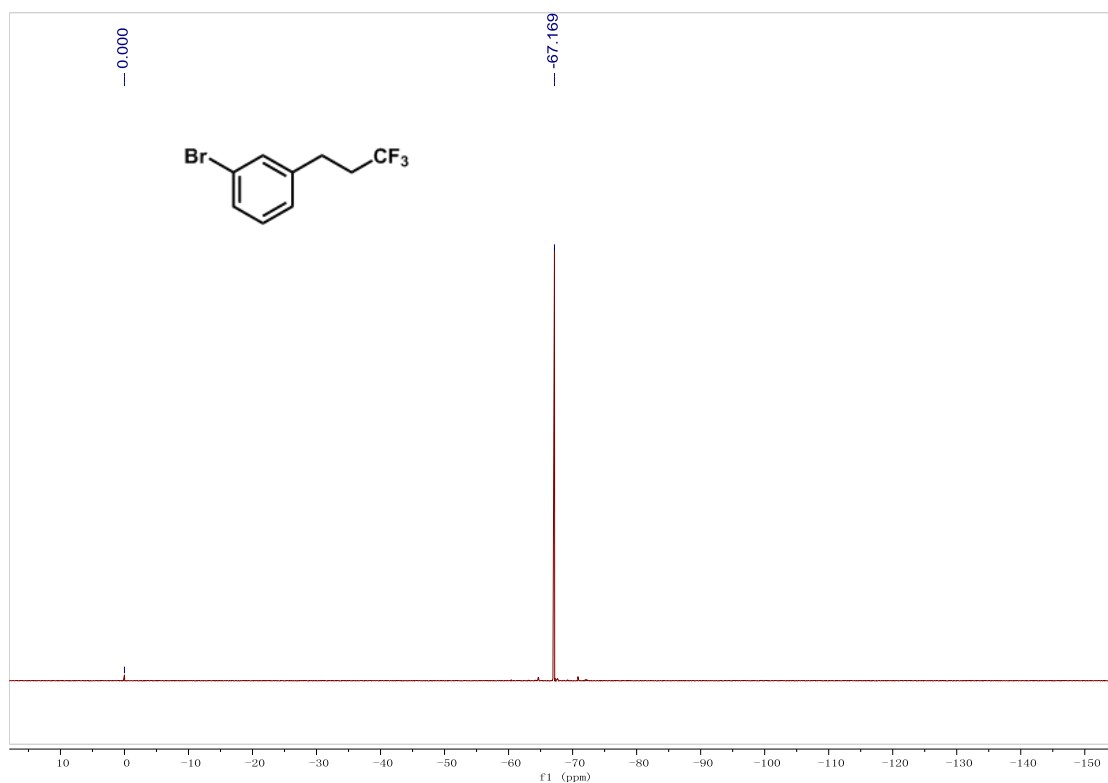

2-16

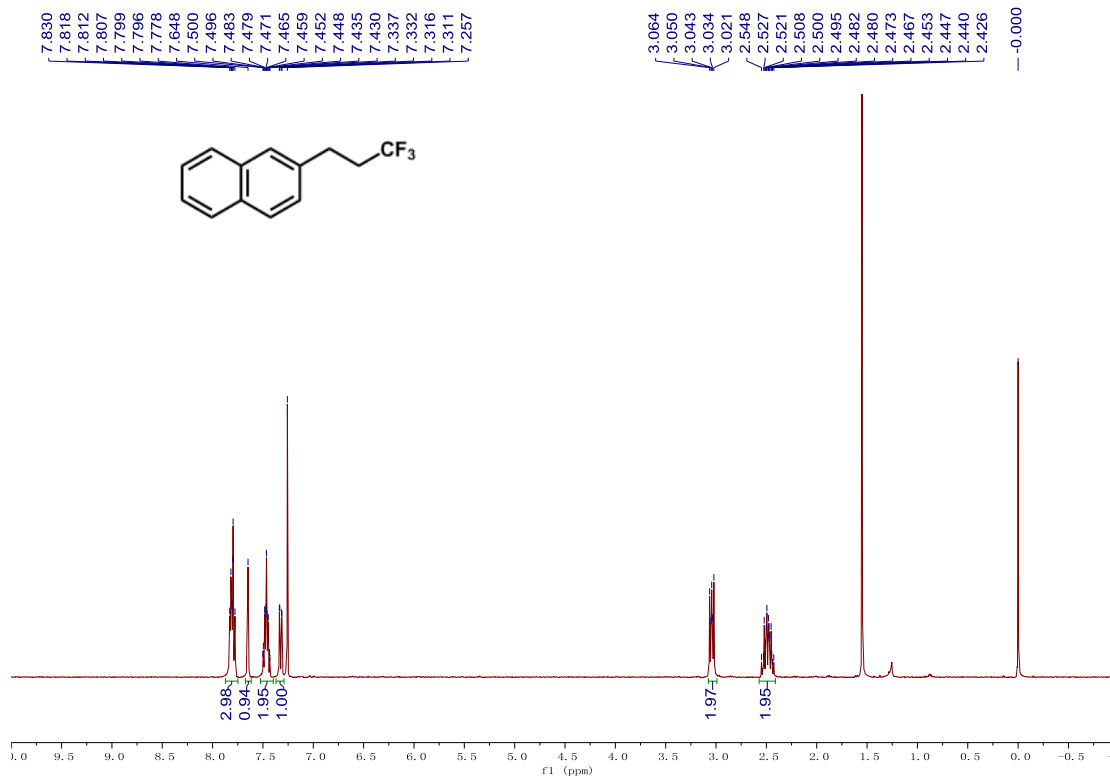

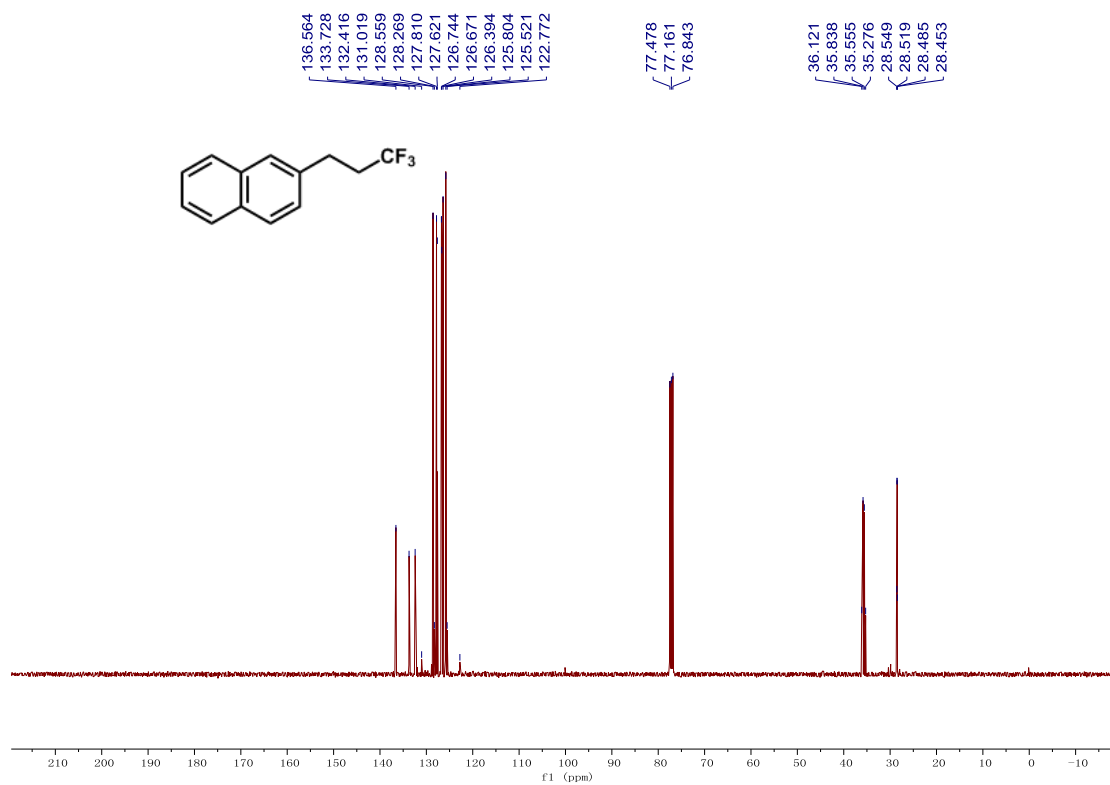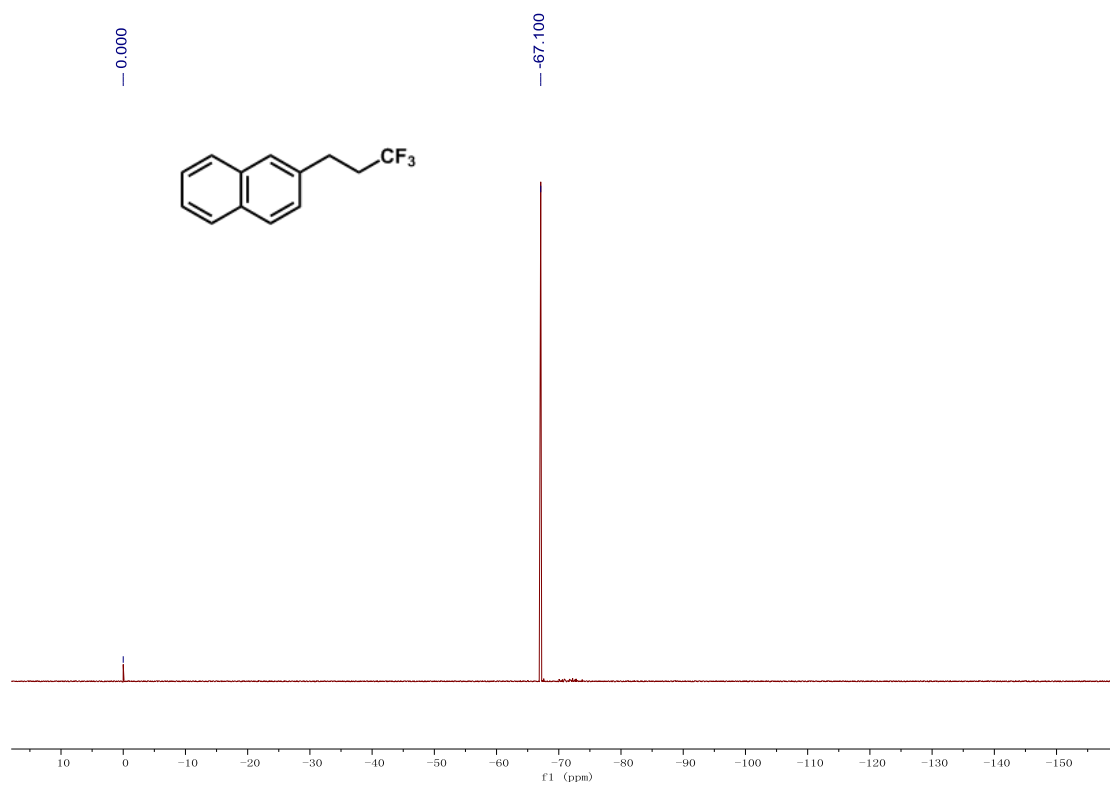



2-17

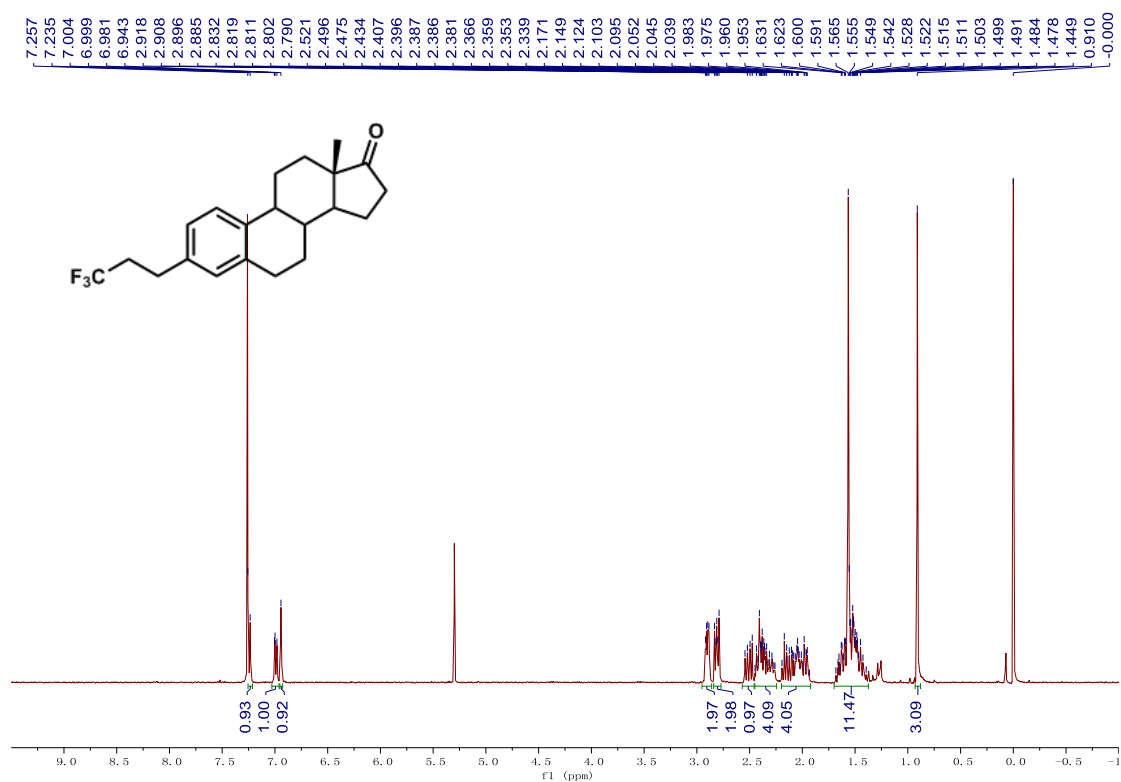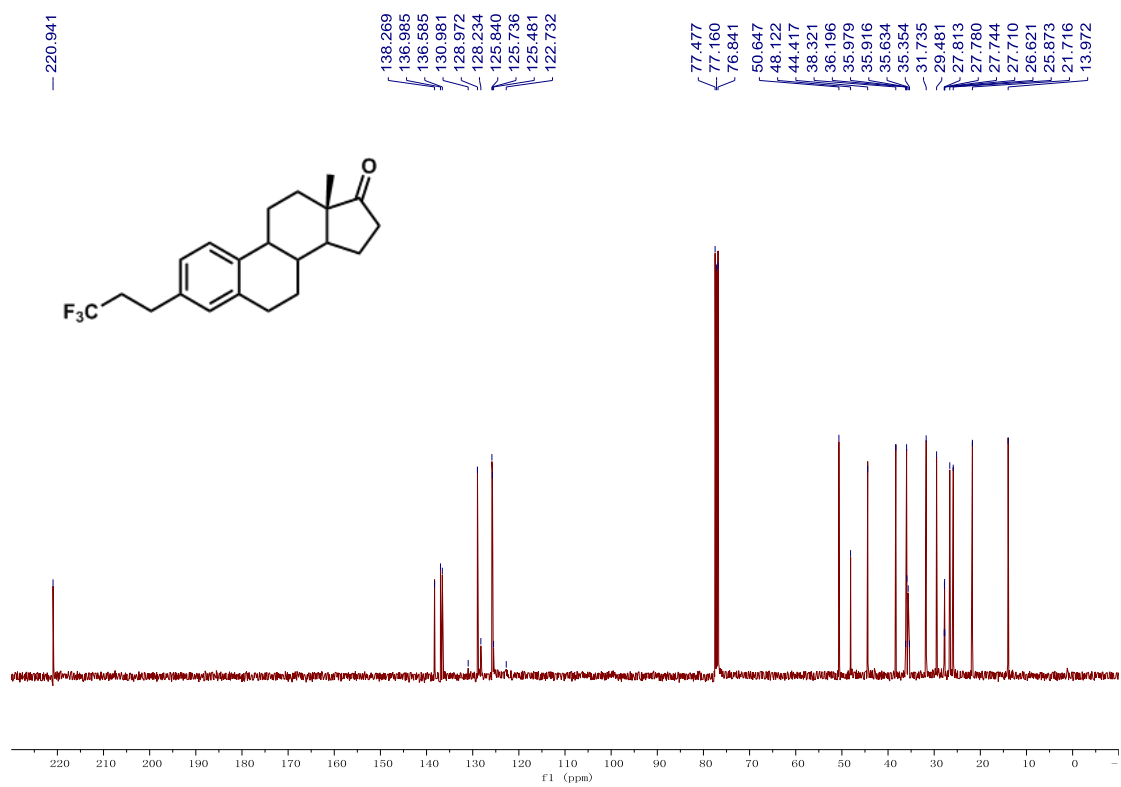

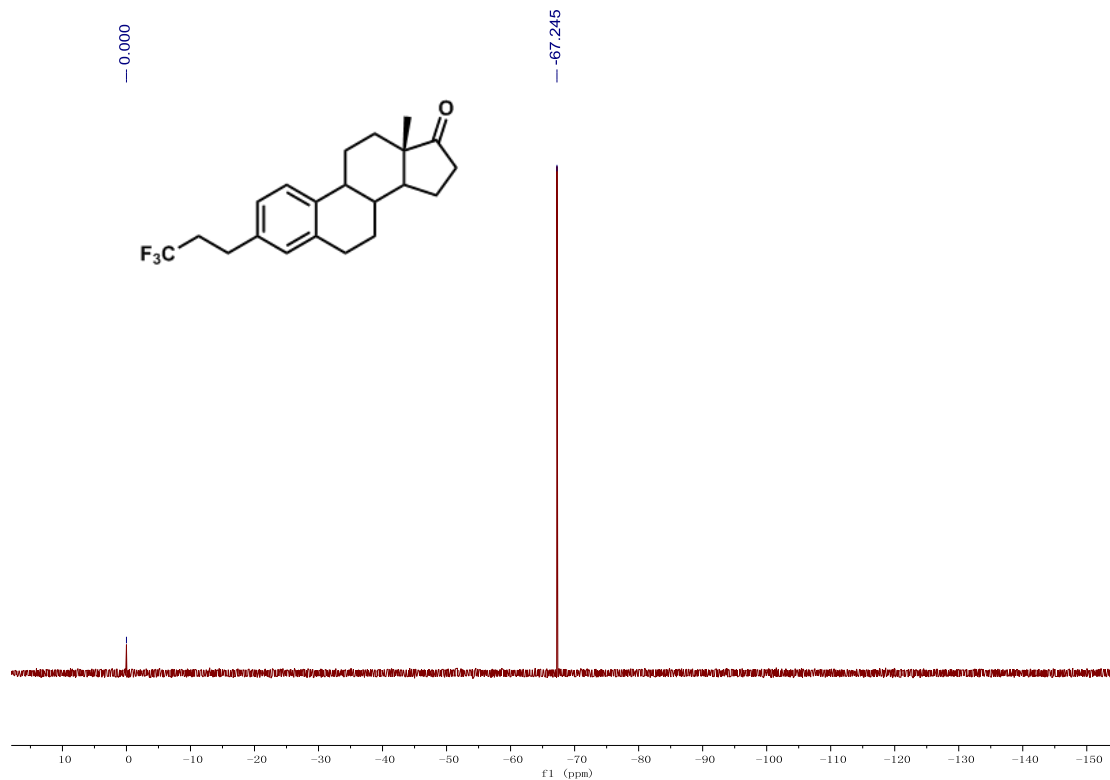

## 2-18

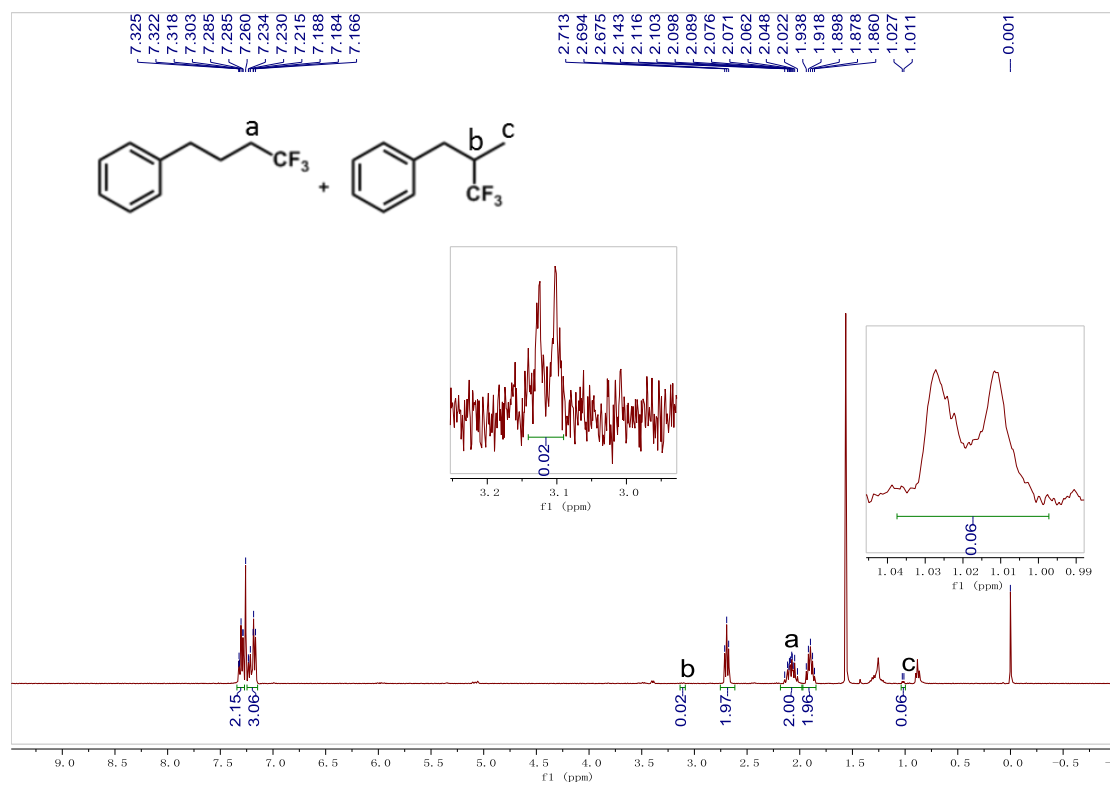

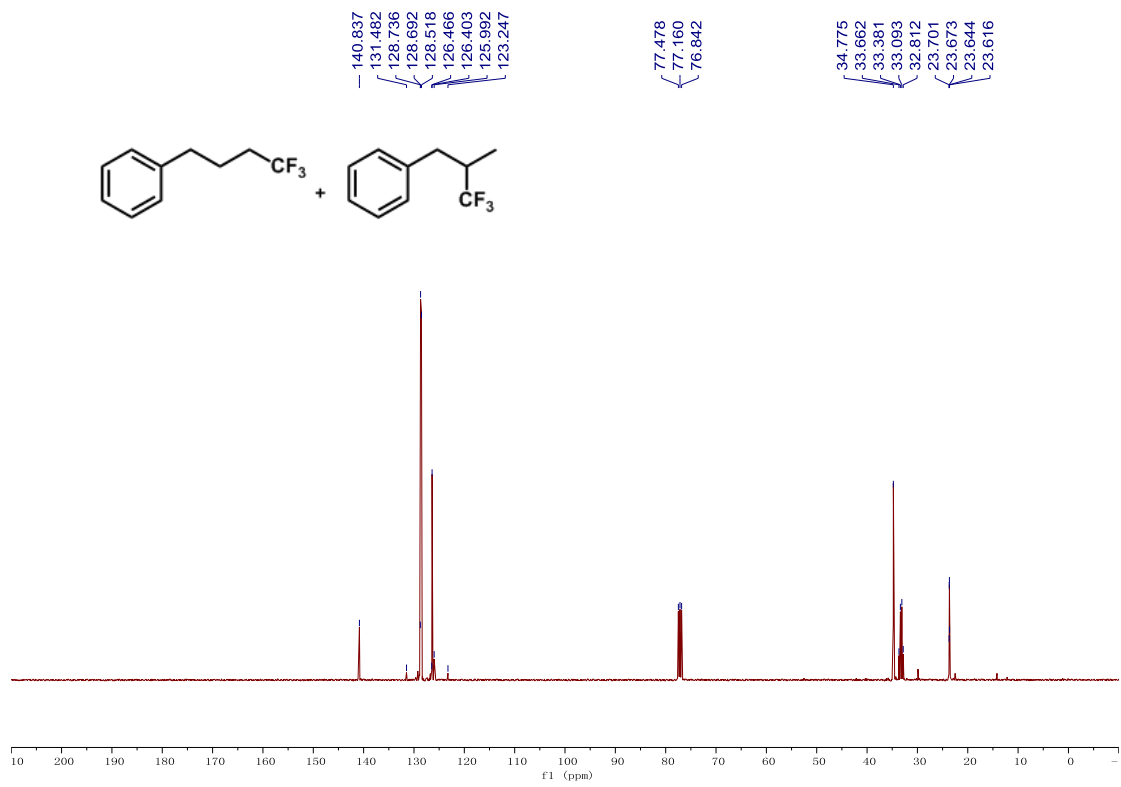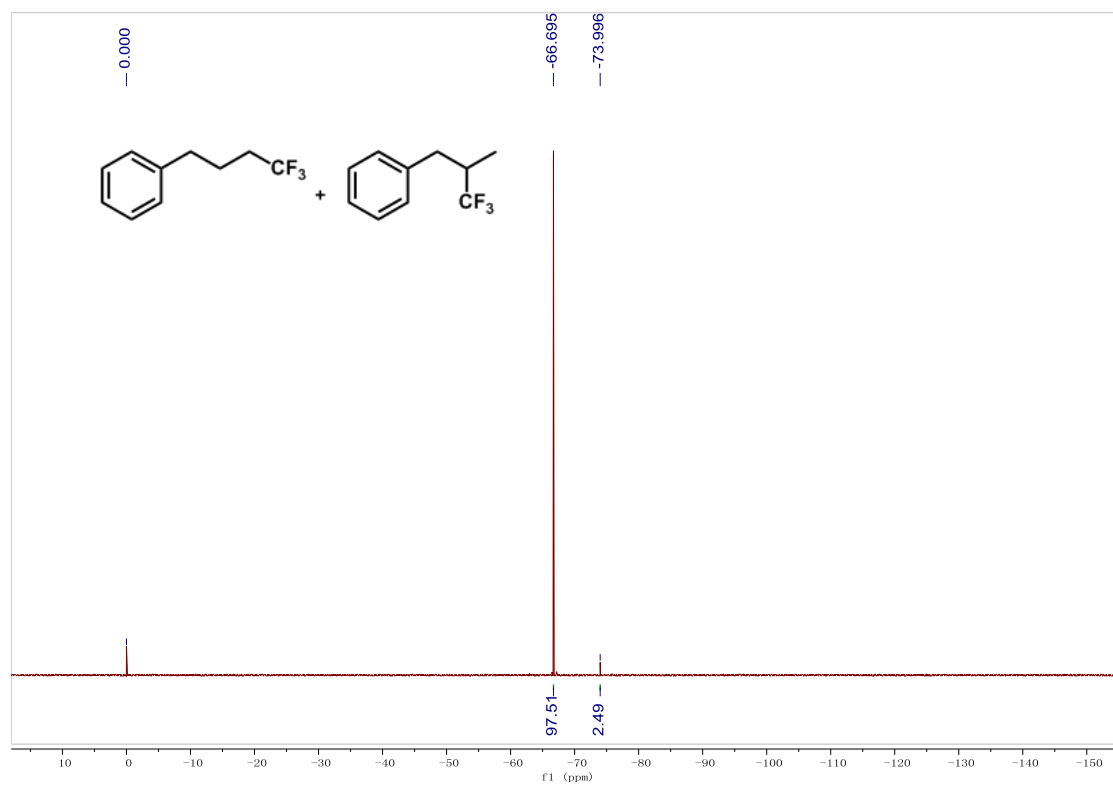

2-19

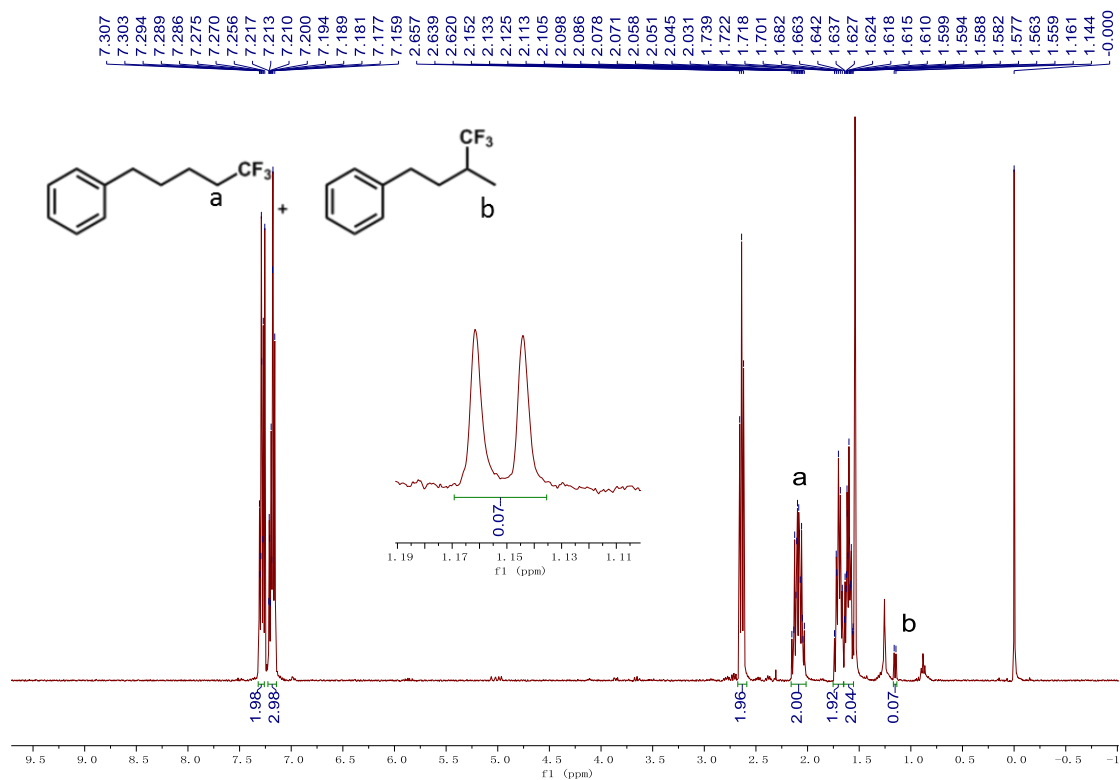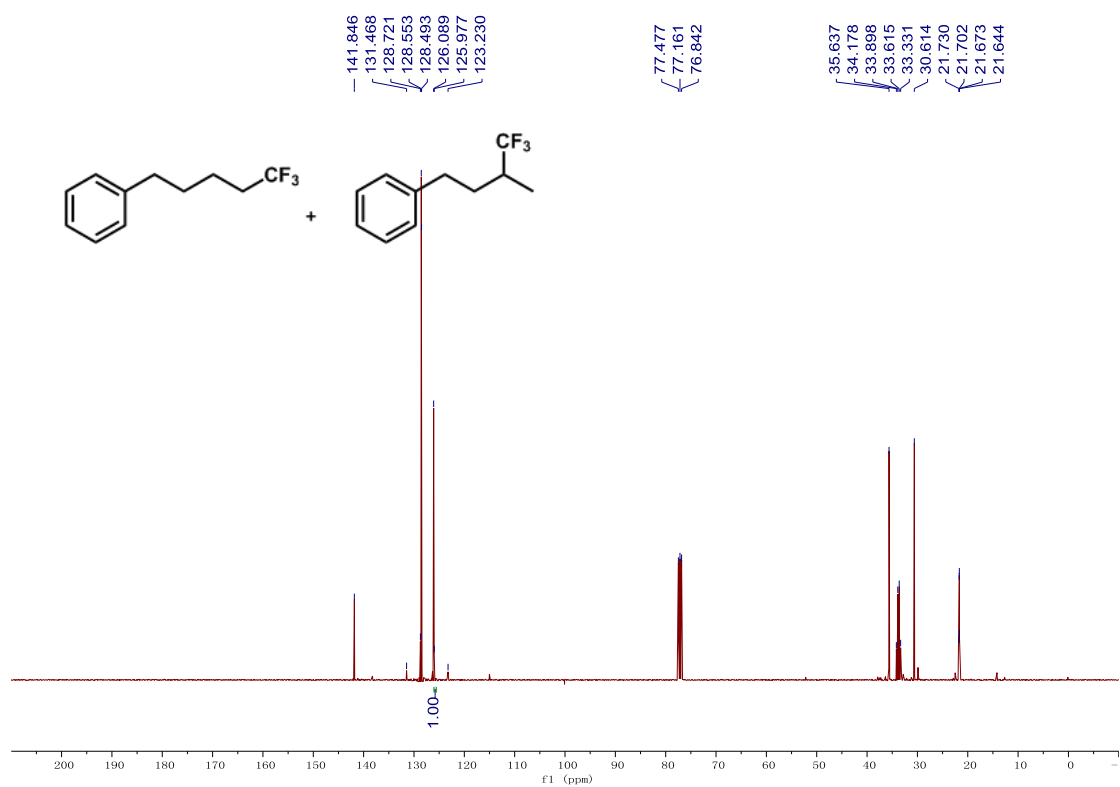

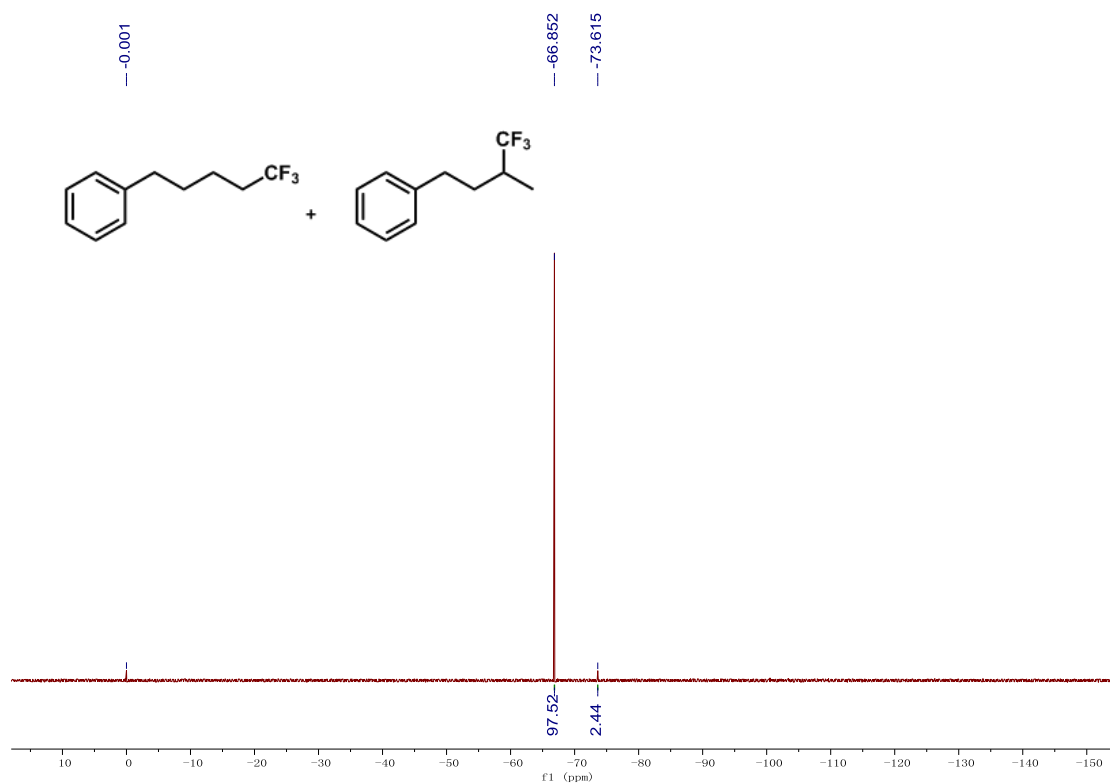

## 2-20

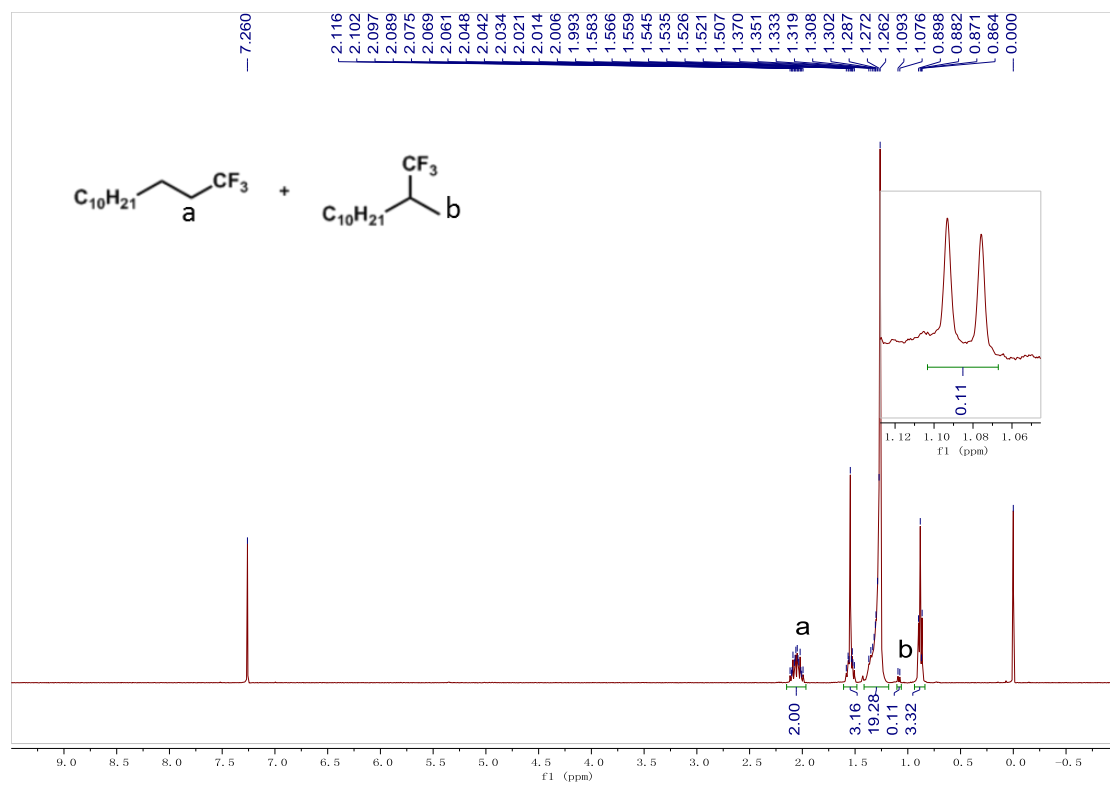

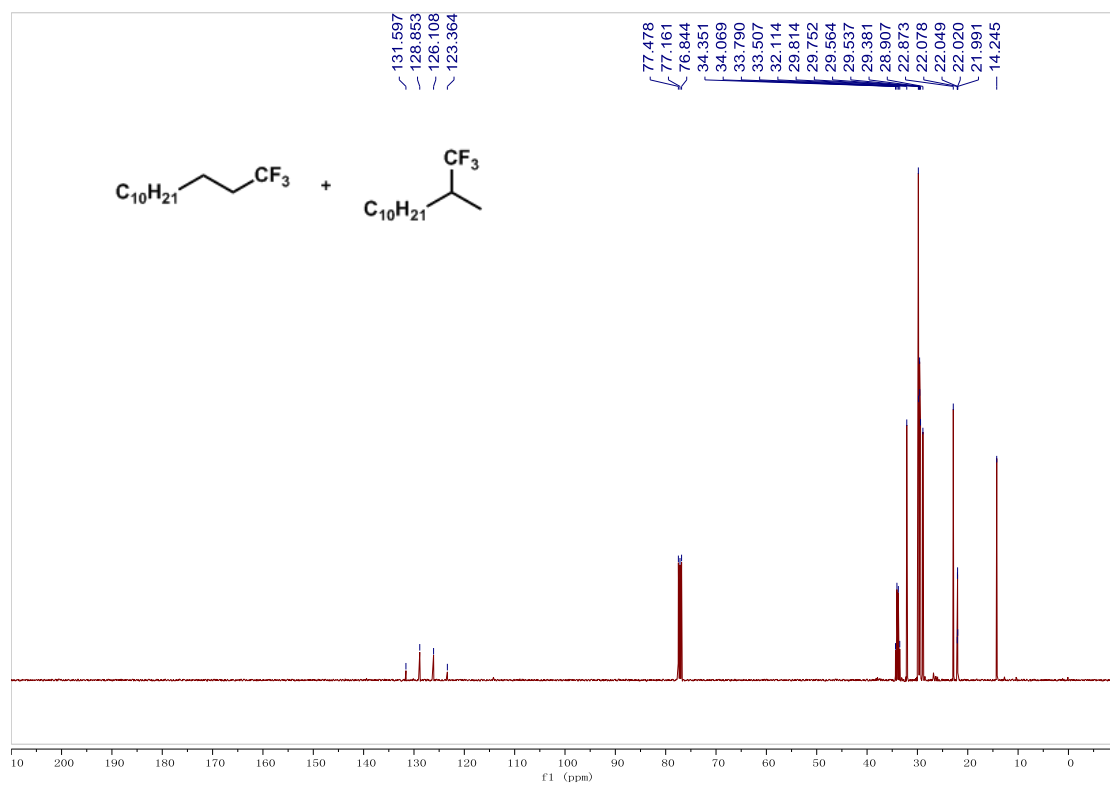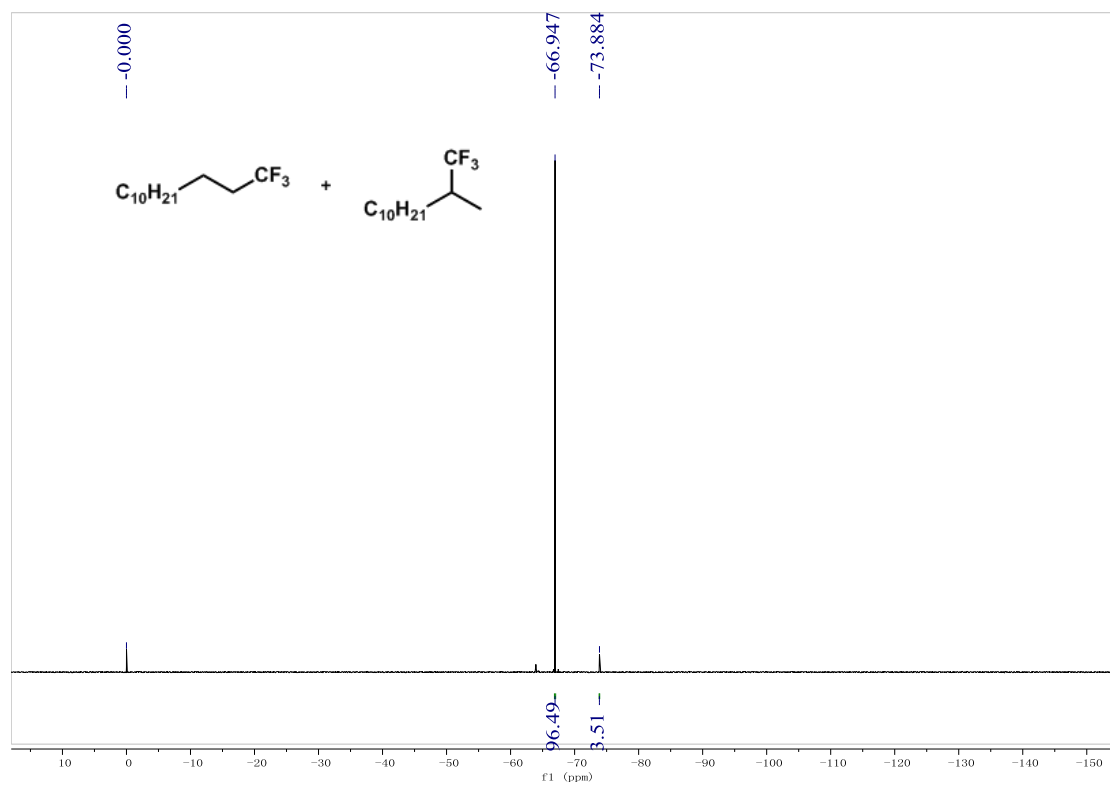

2-21

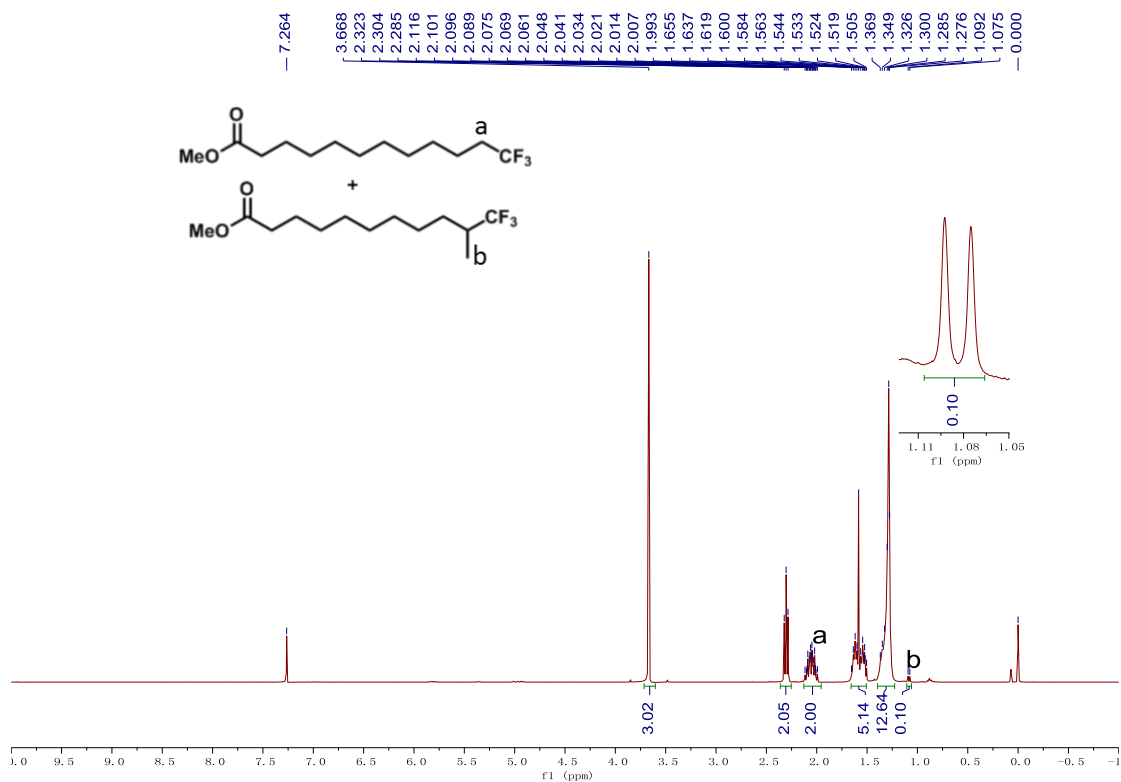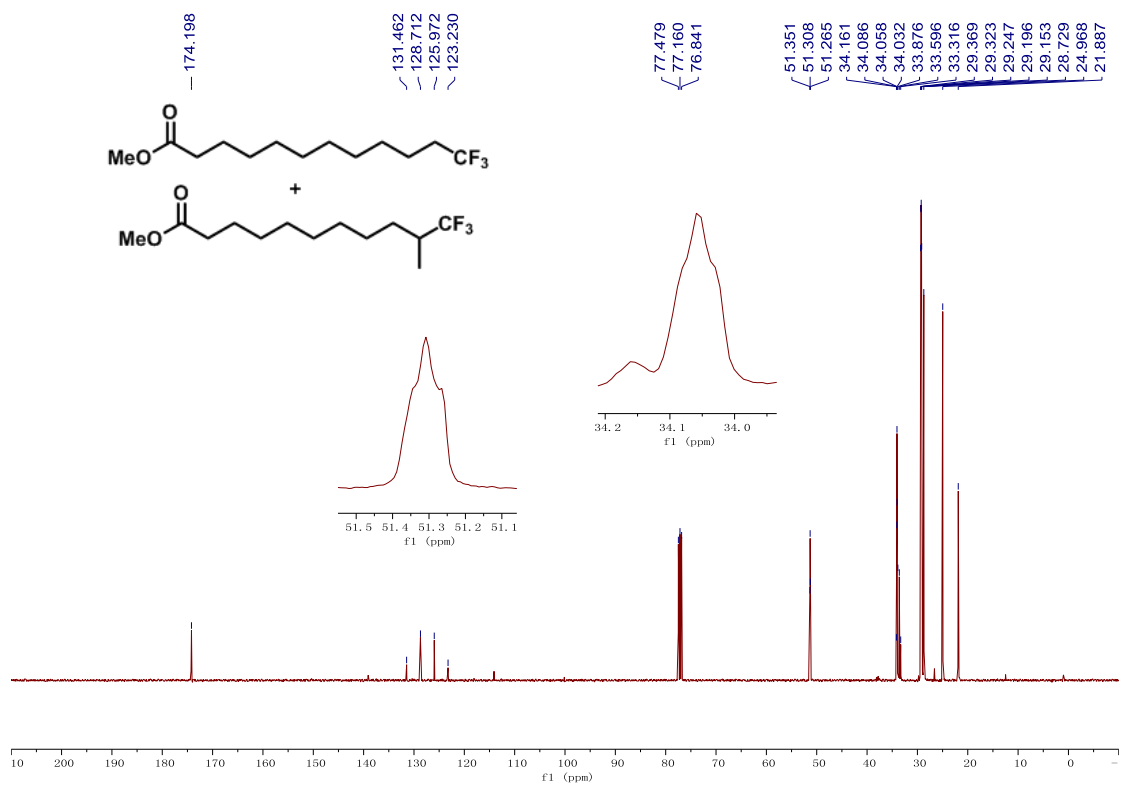

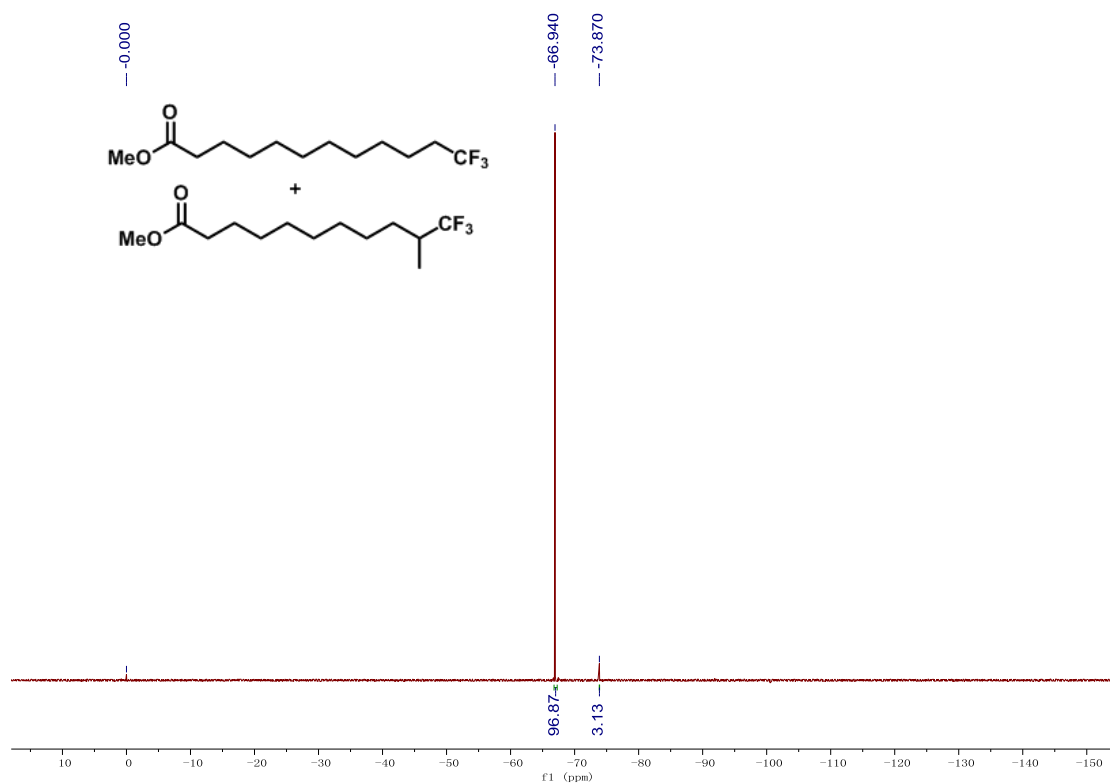

2-22

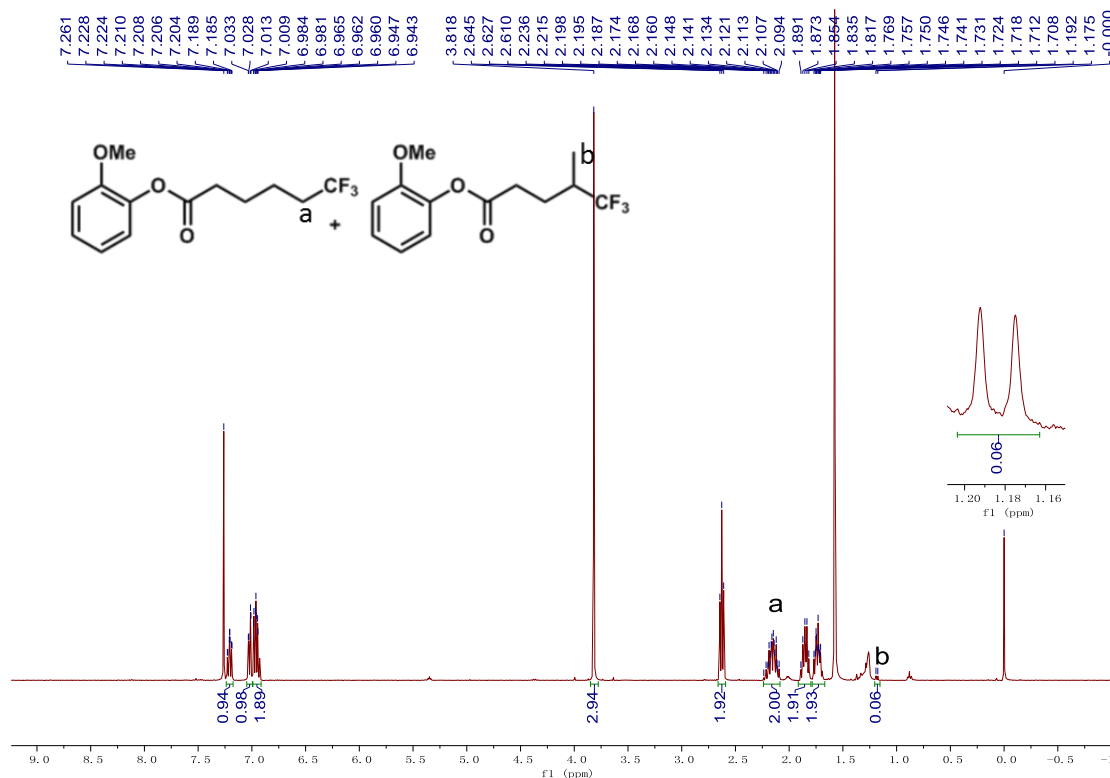



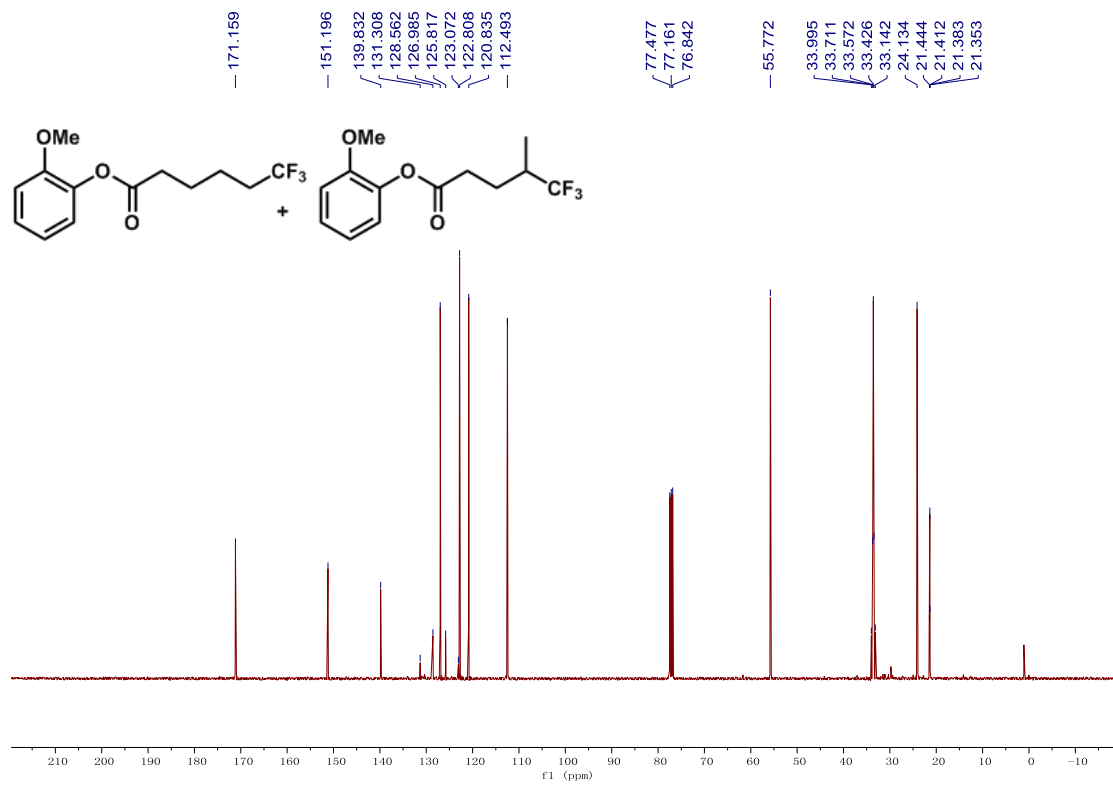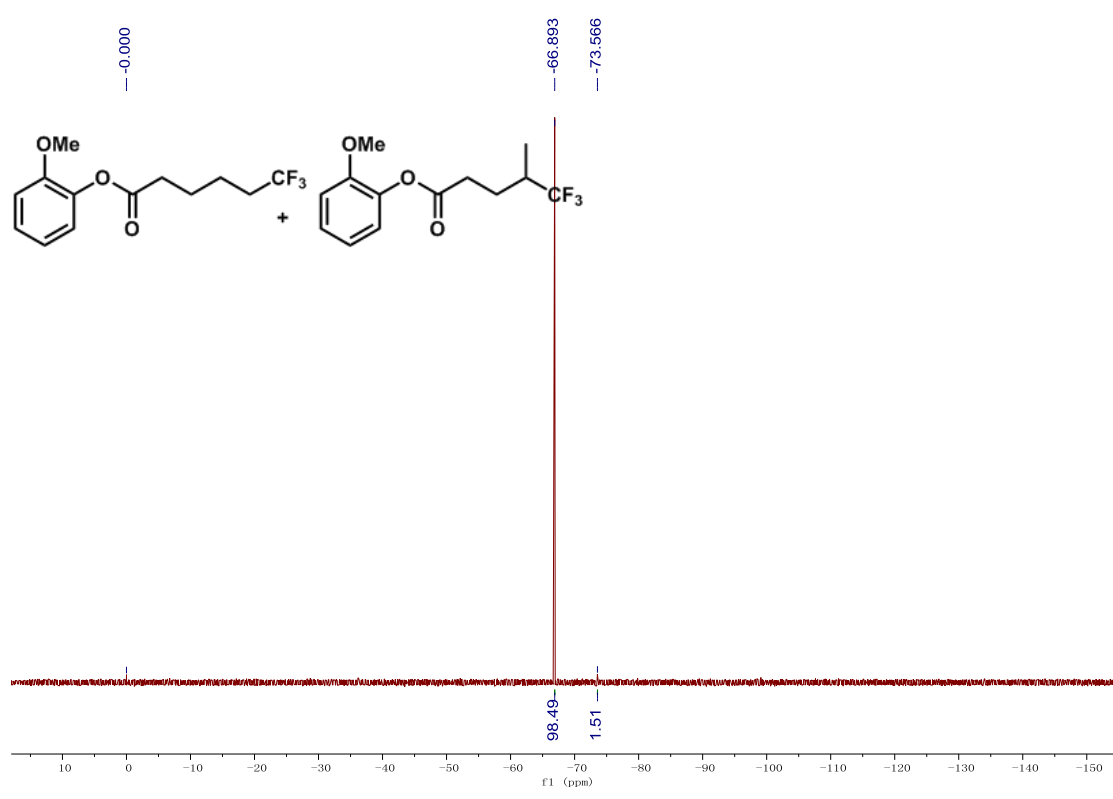

2-23

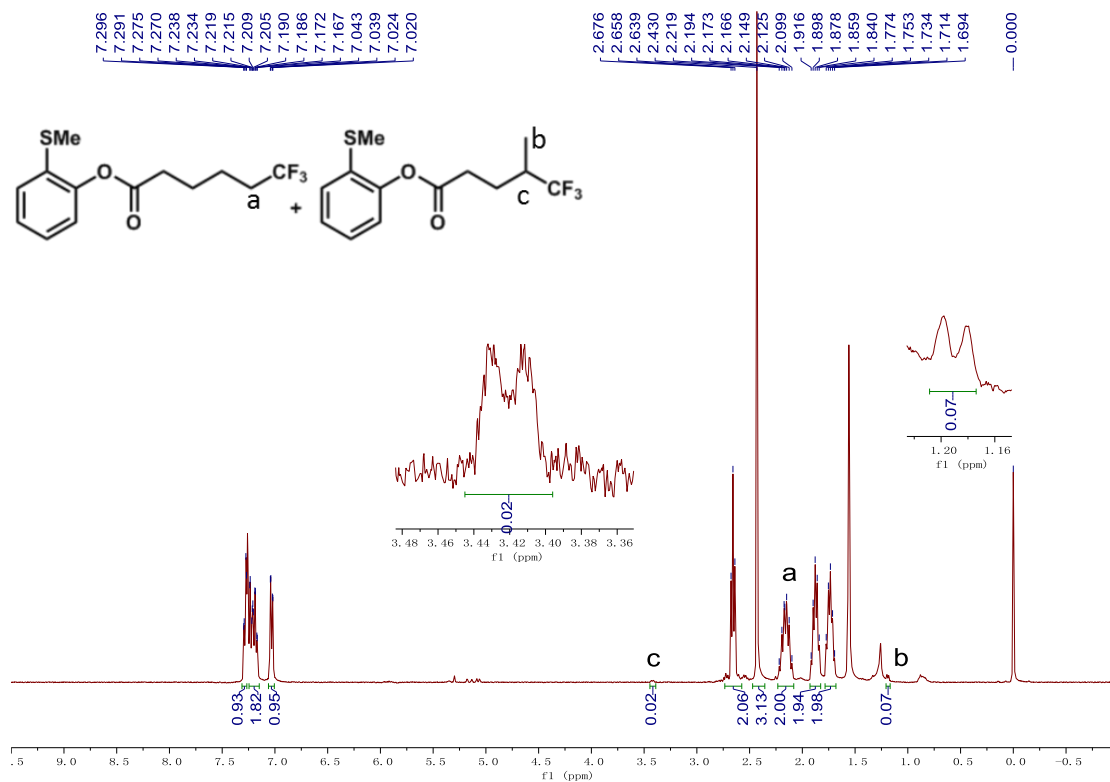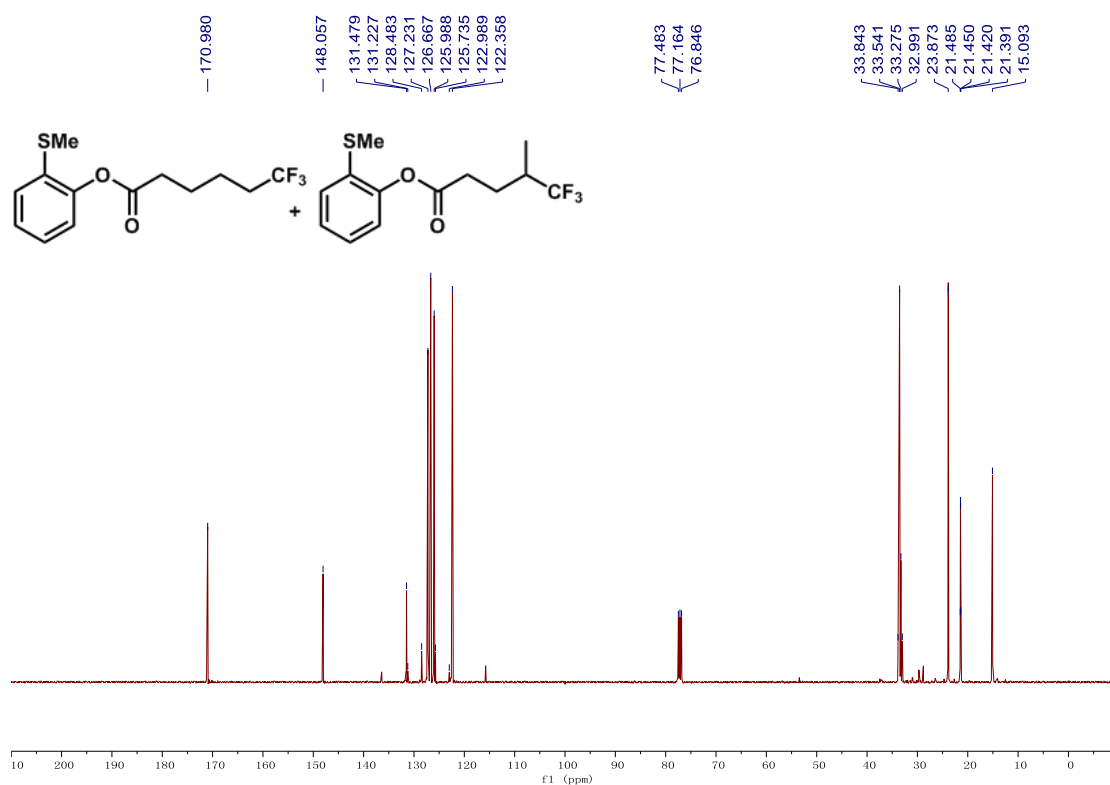

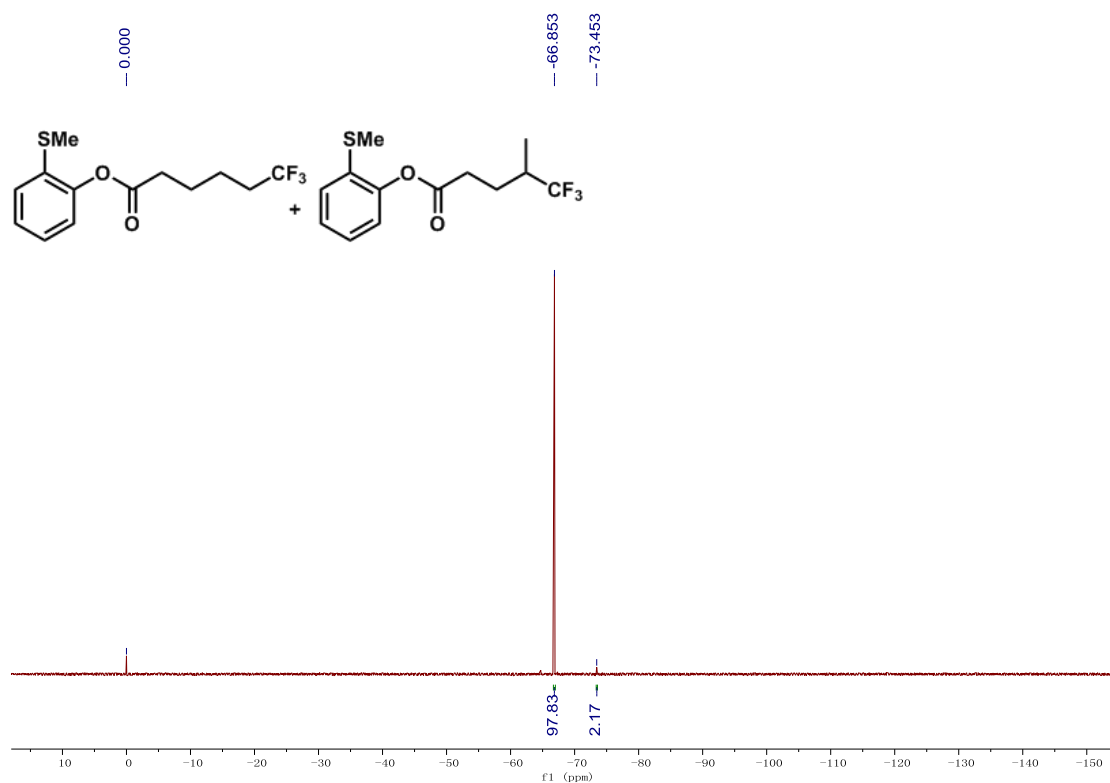

## 2-24

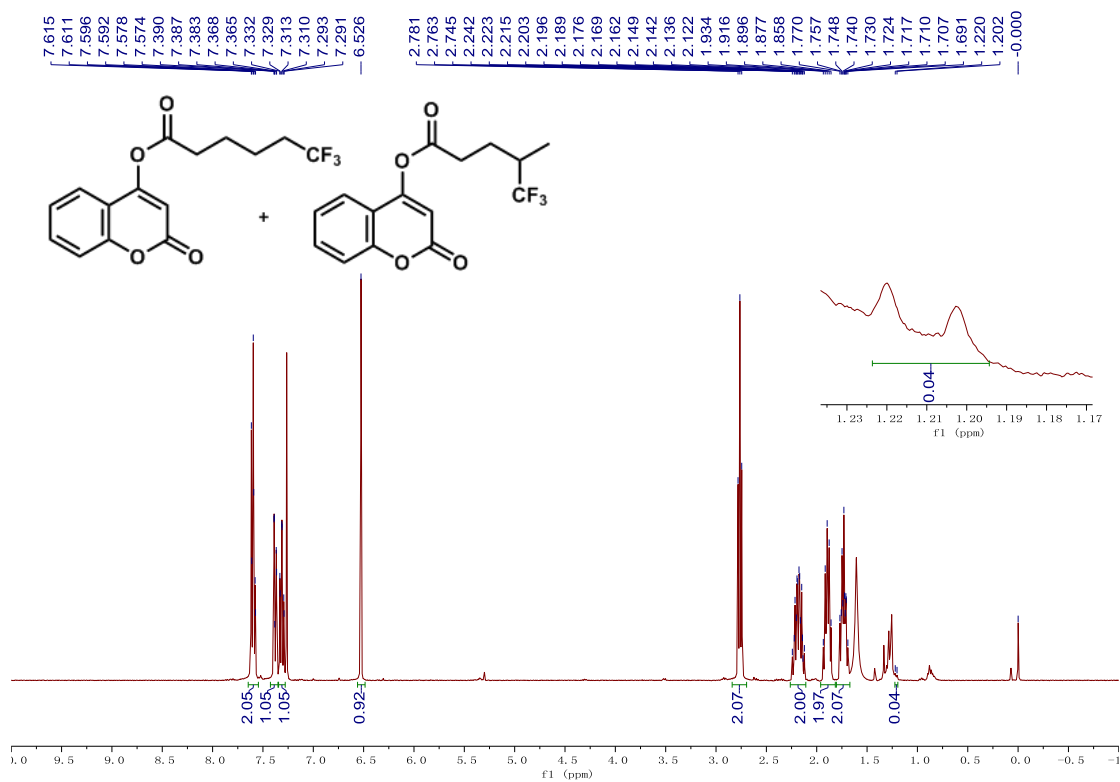

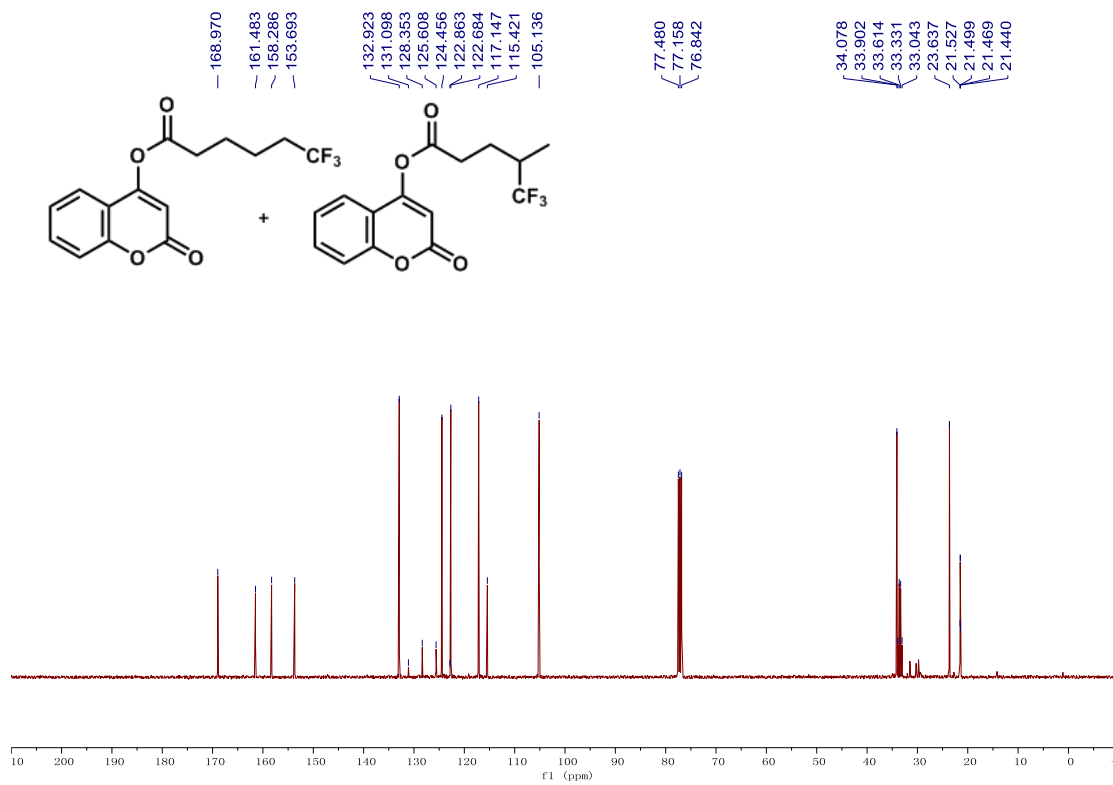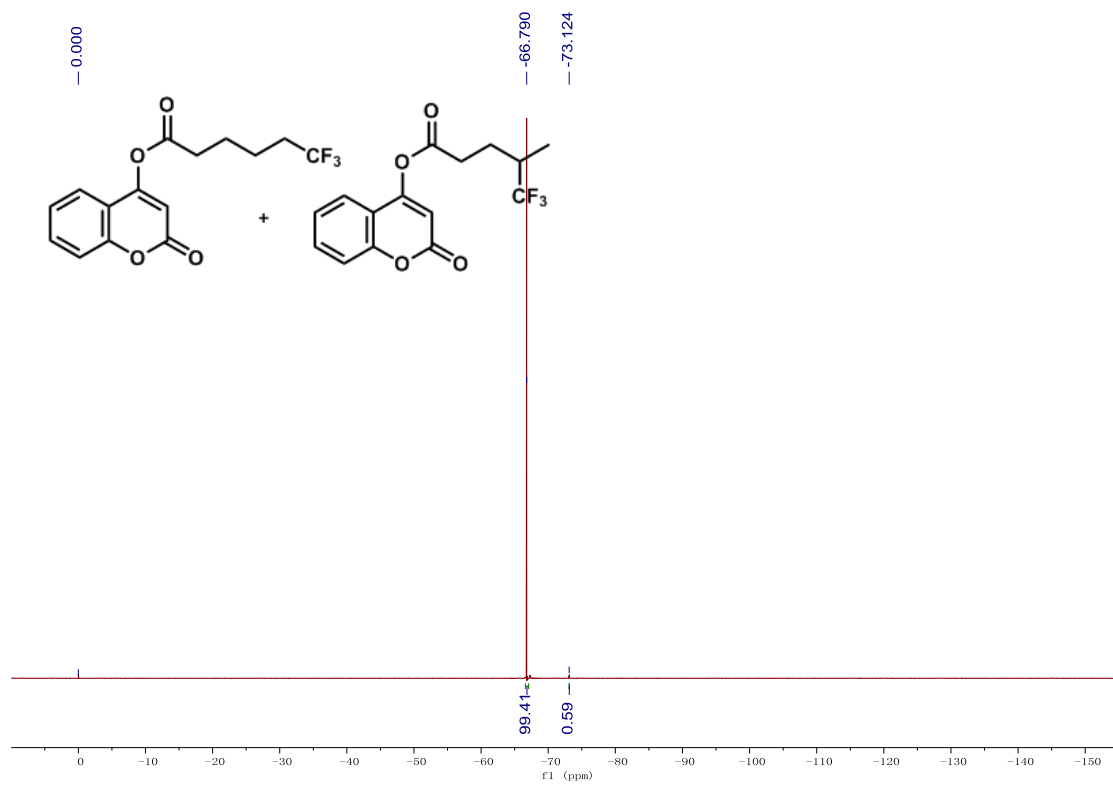

# 2-25

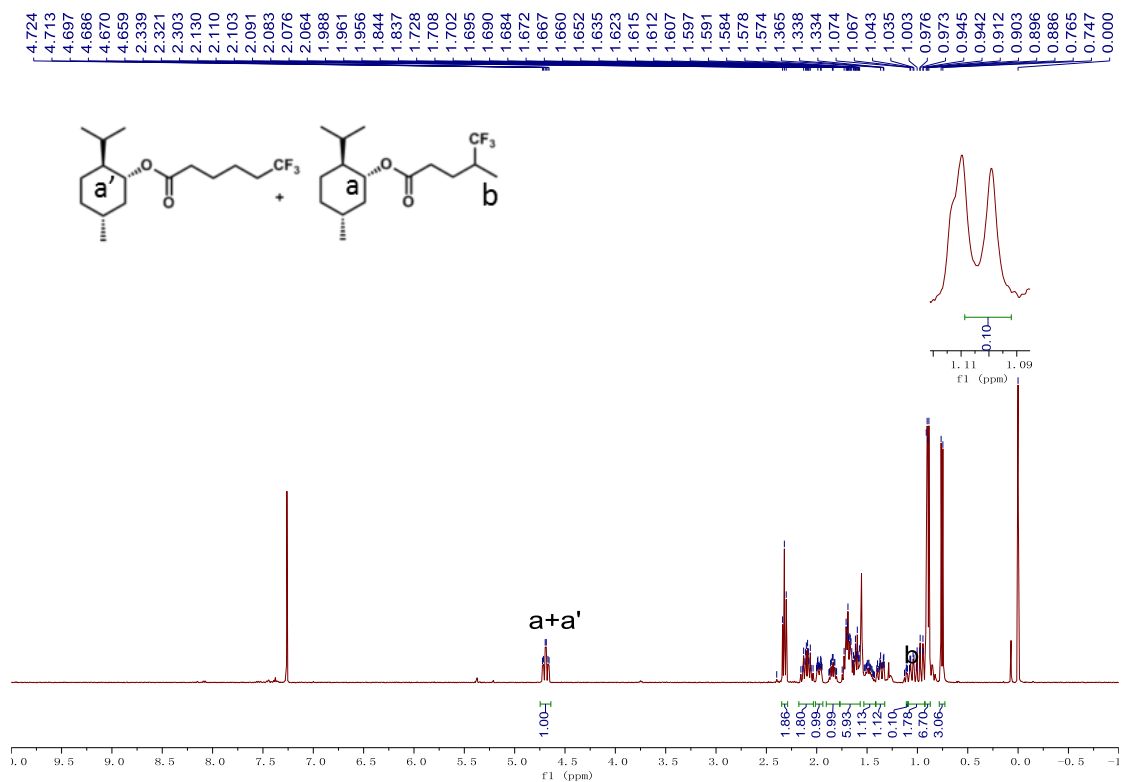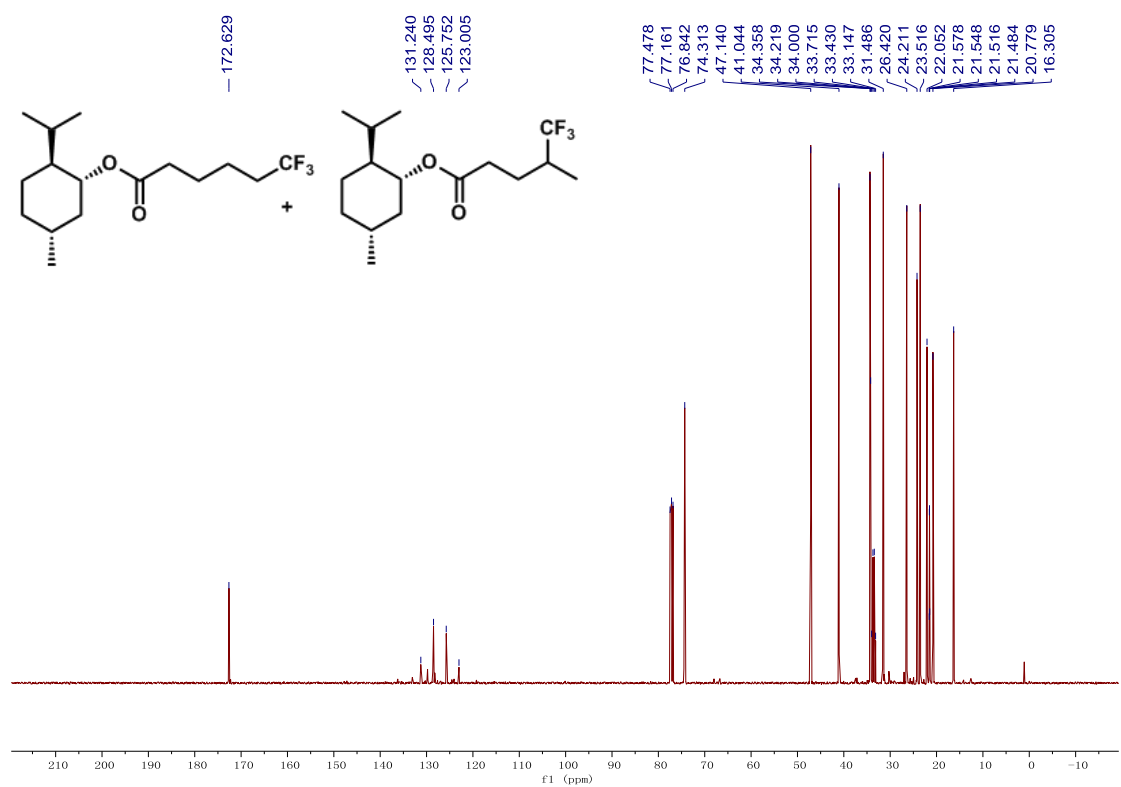

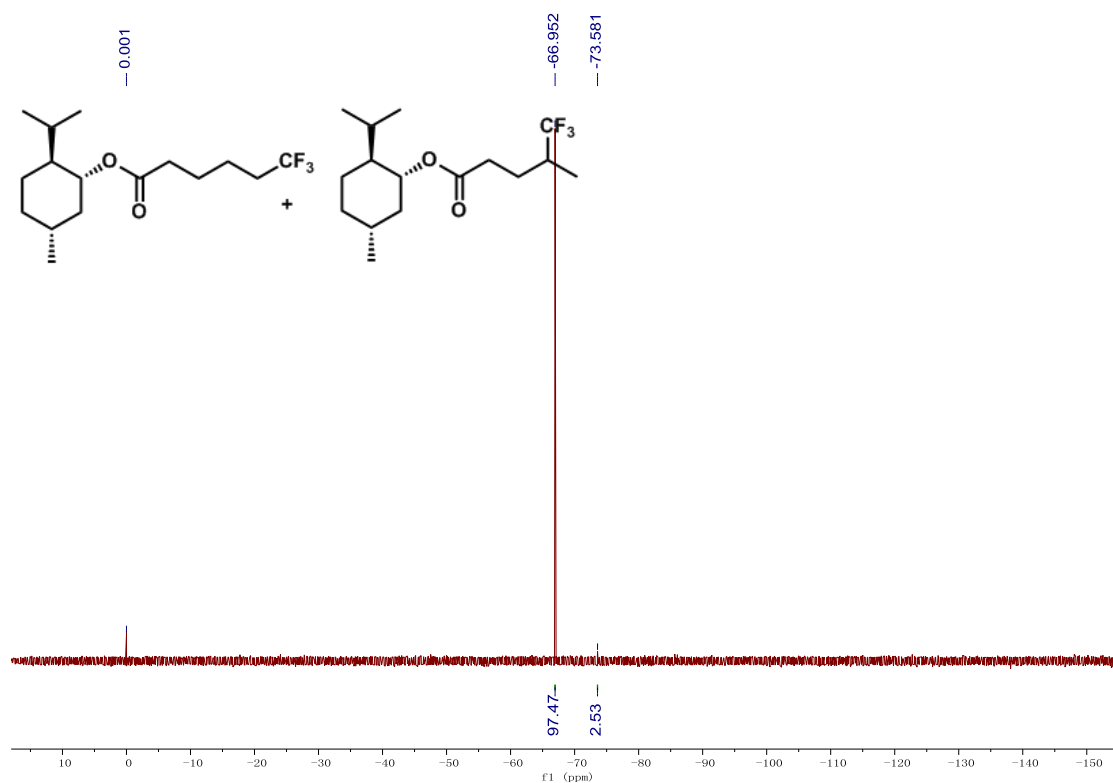

## 2-26

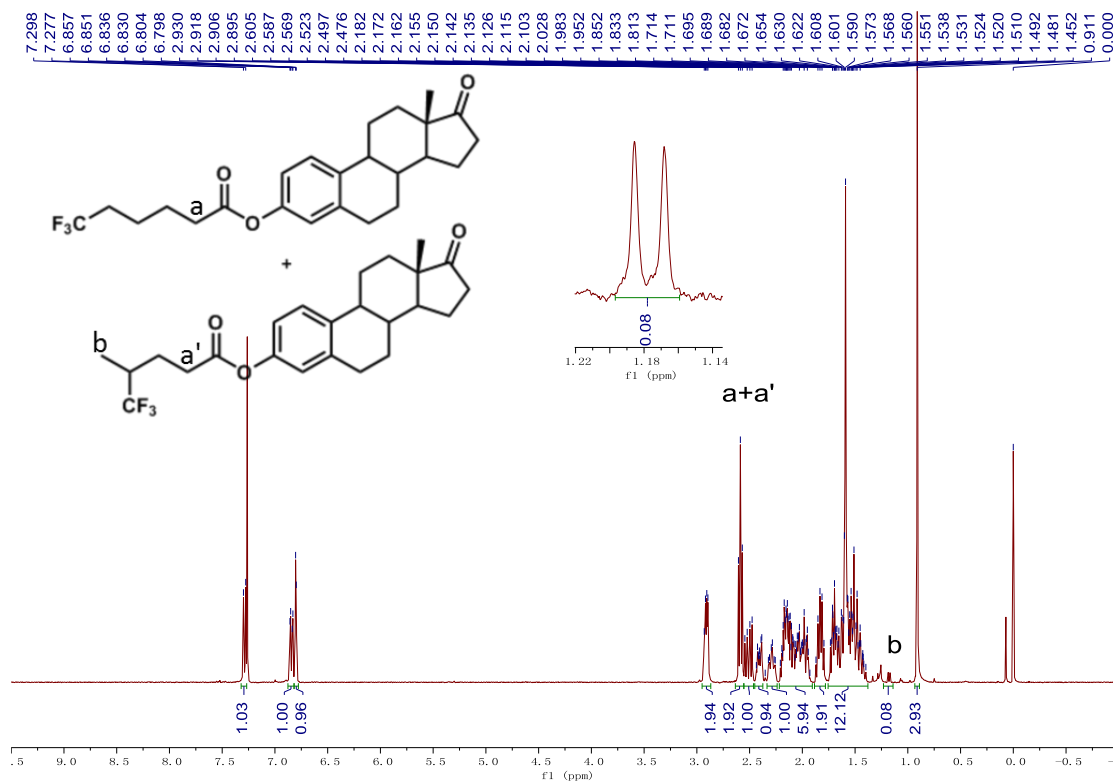

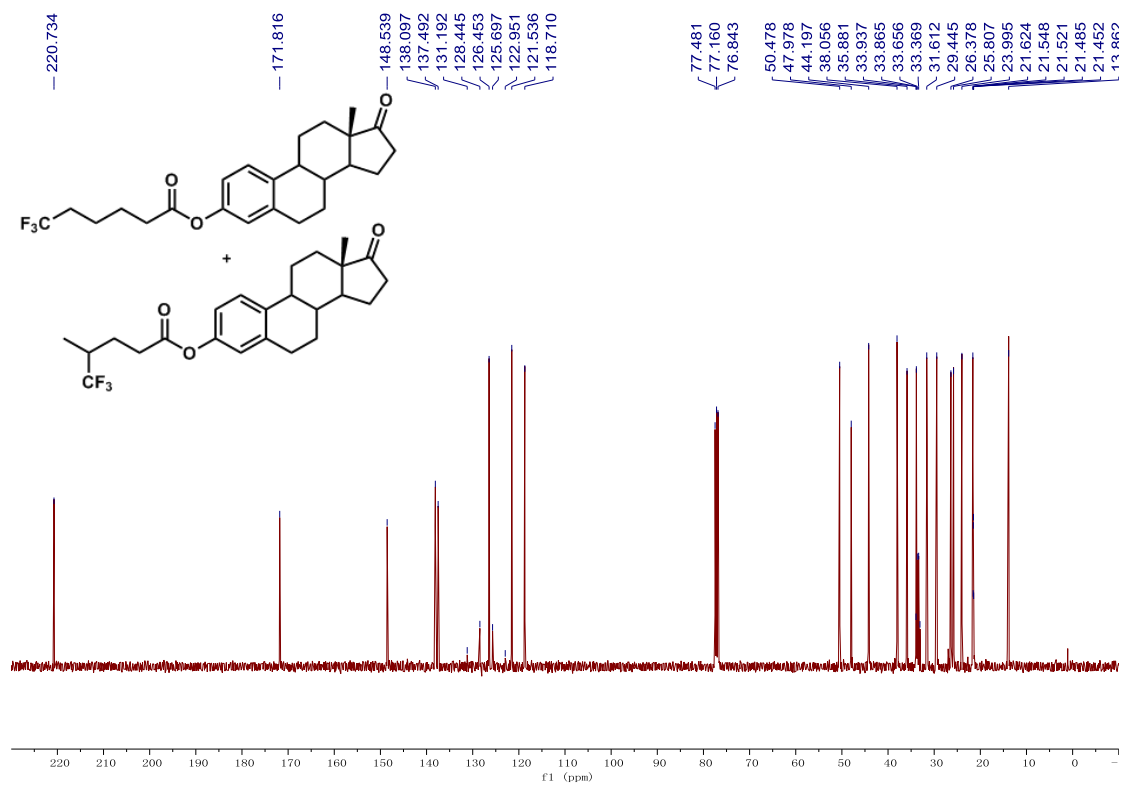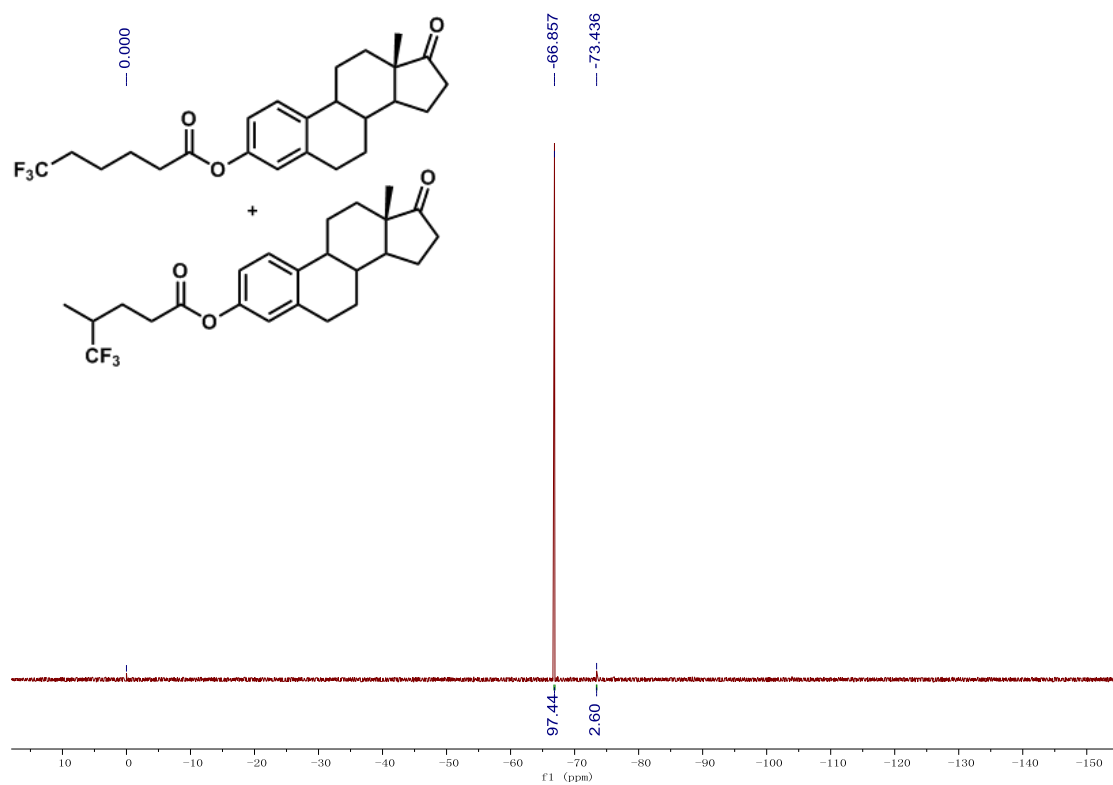

2-27

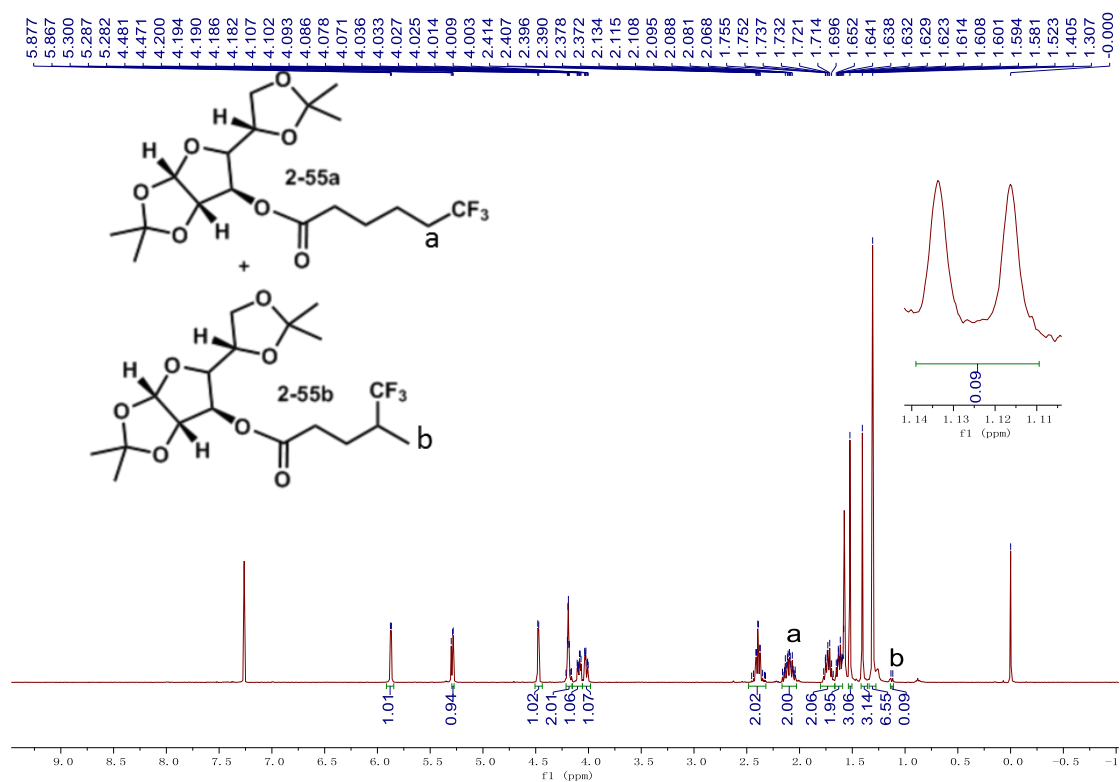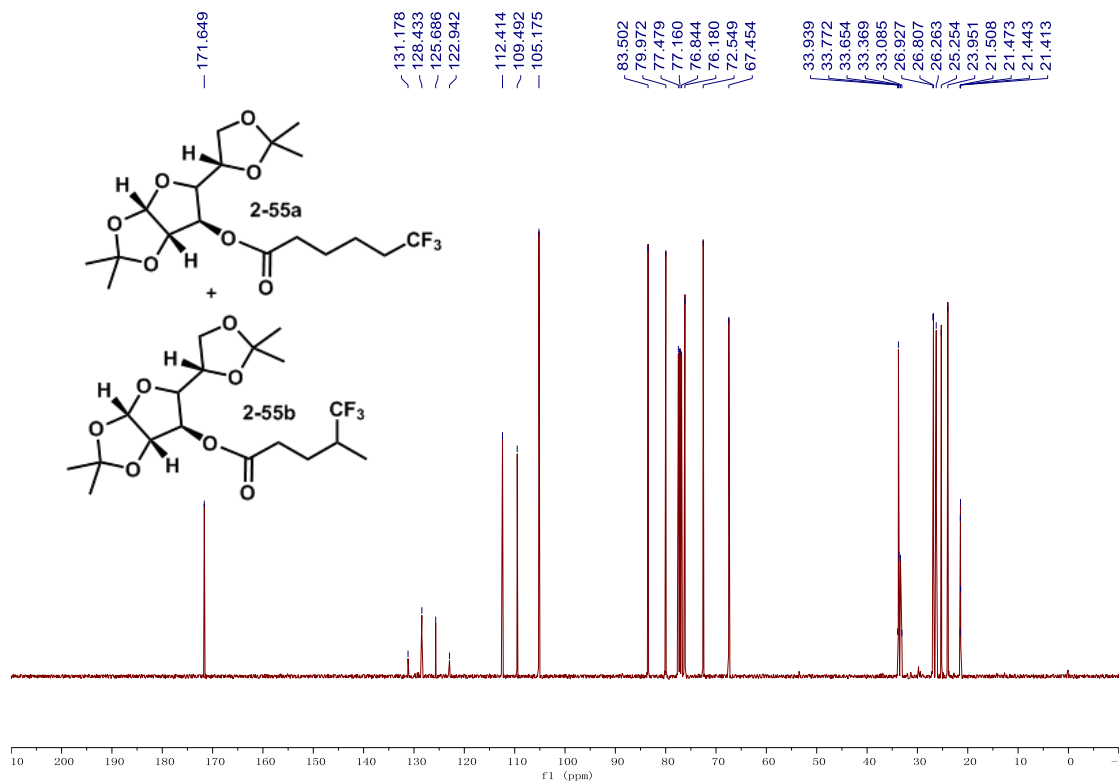



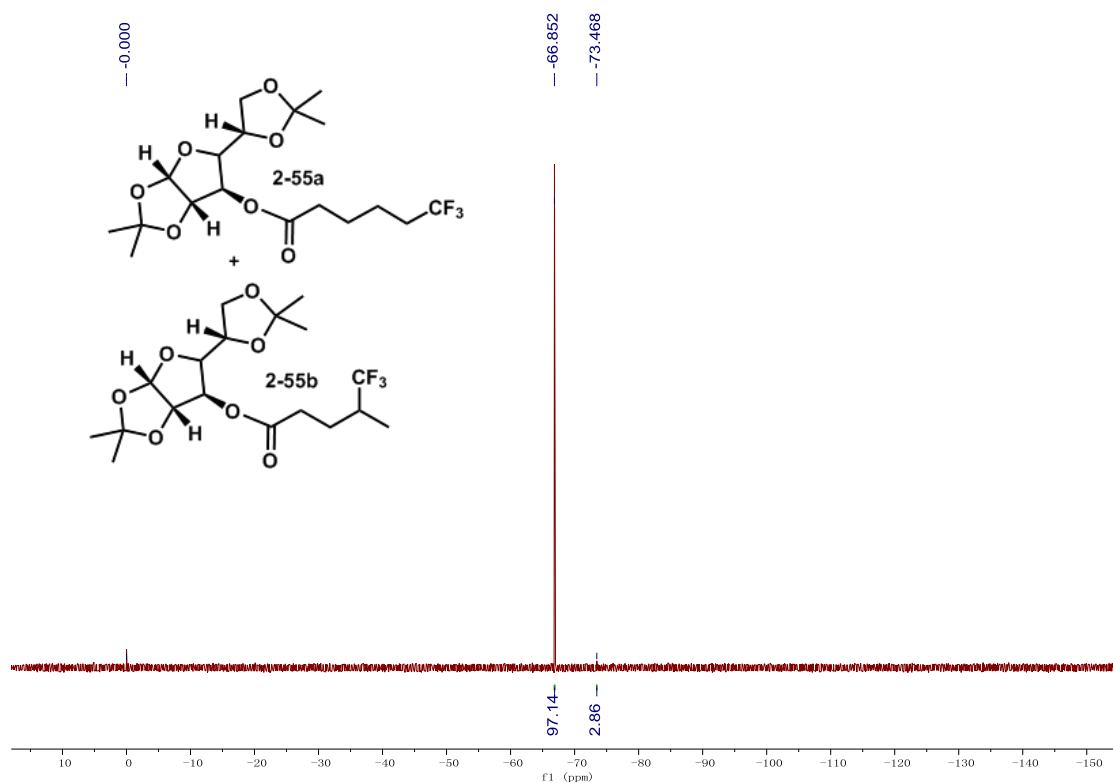

## 2-28

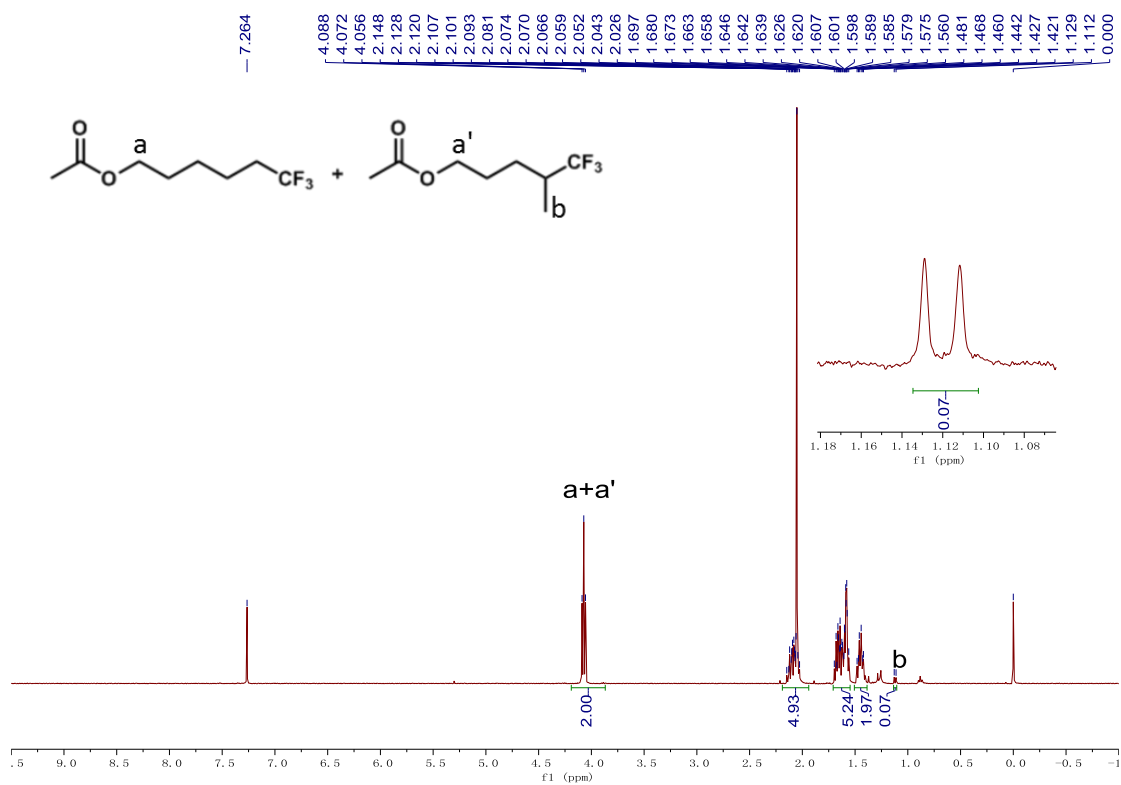

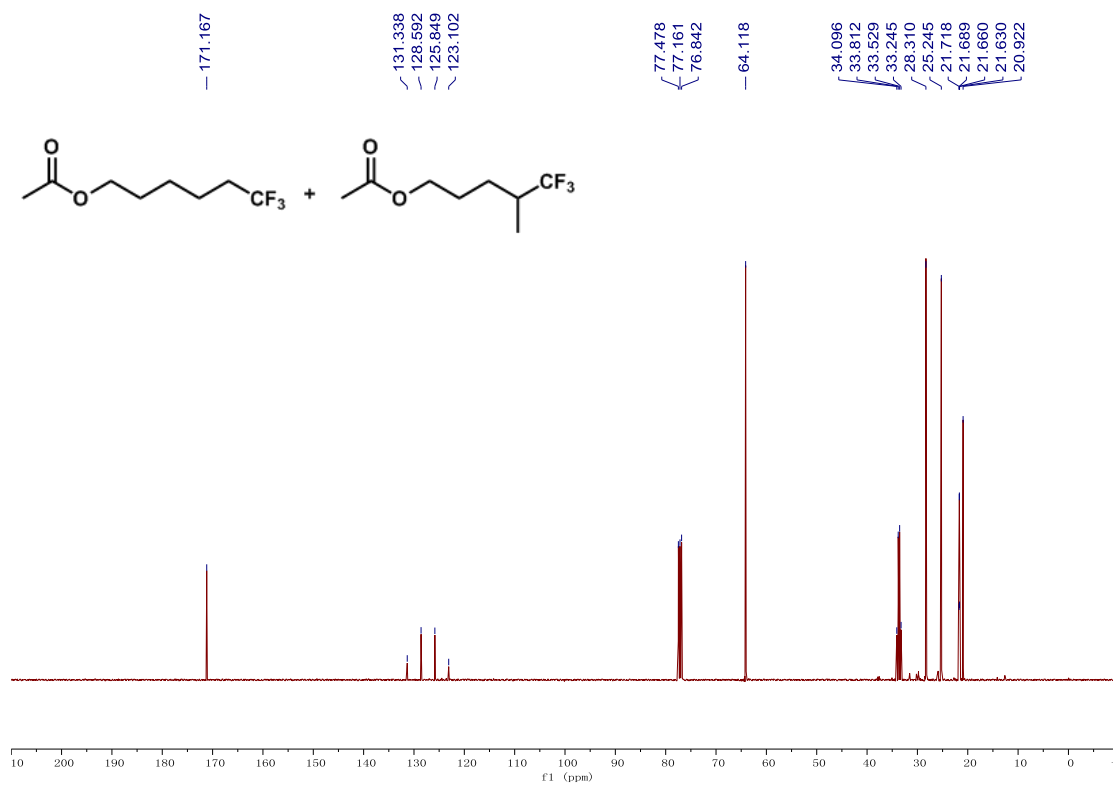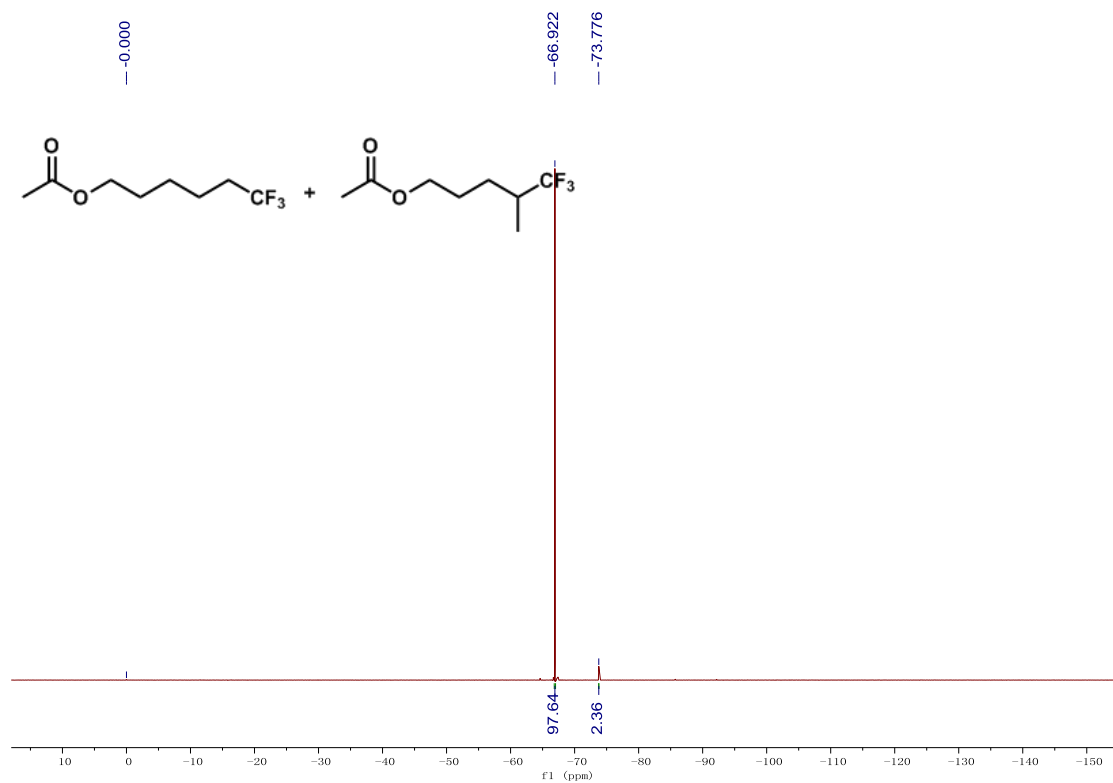

2-29

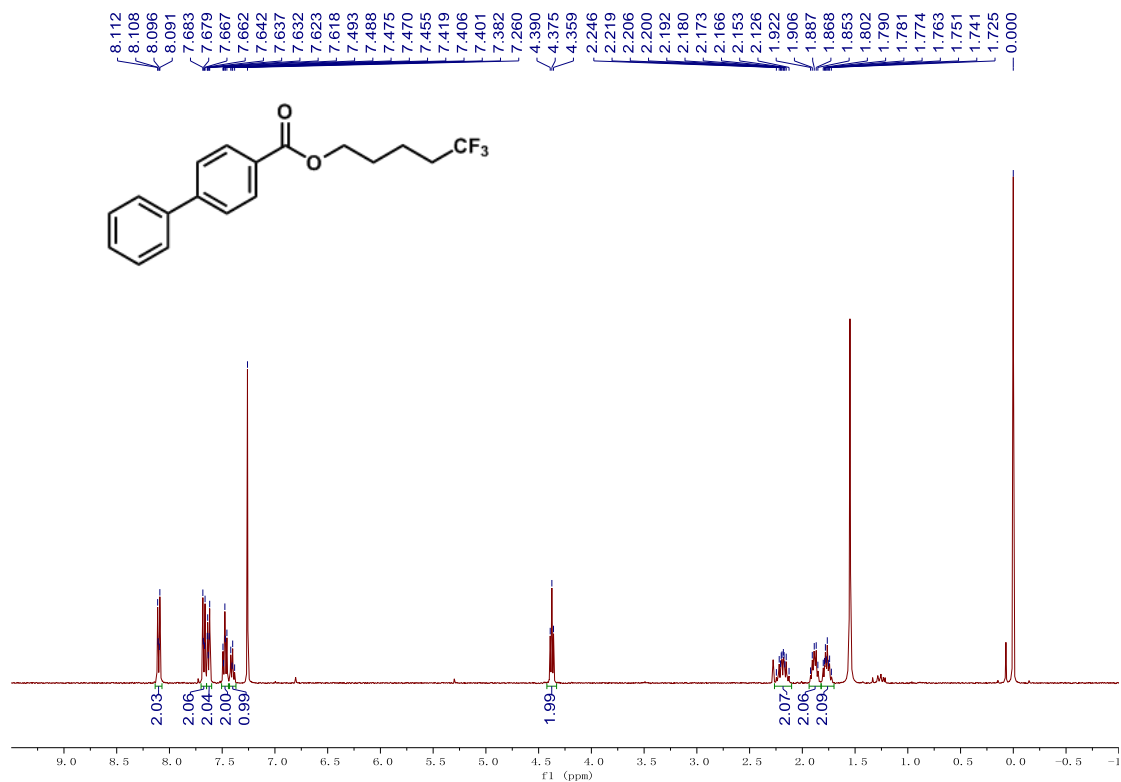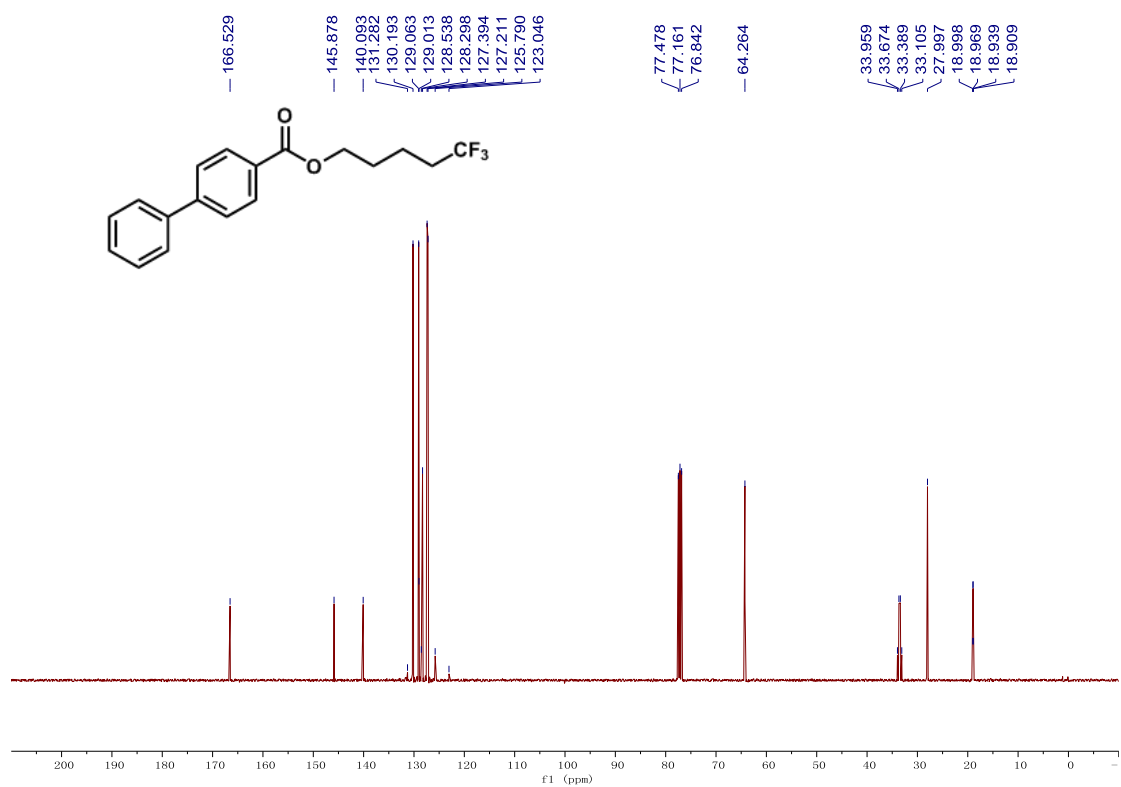

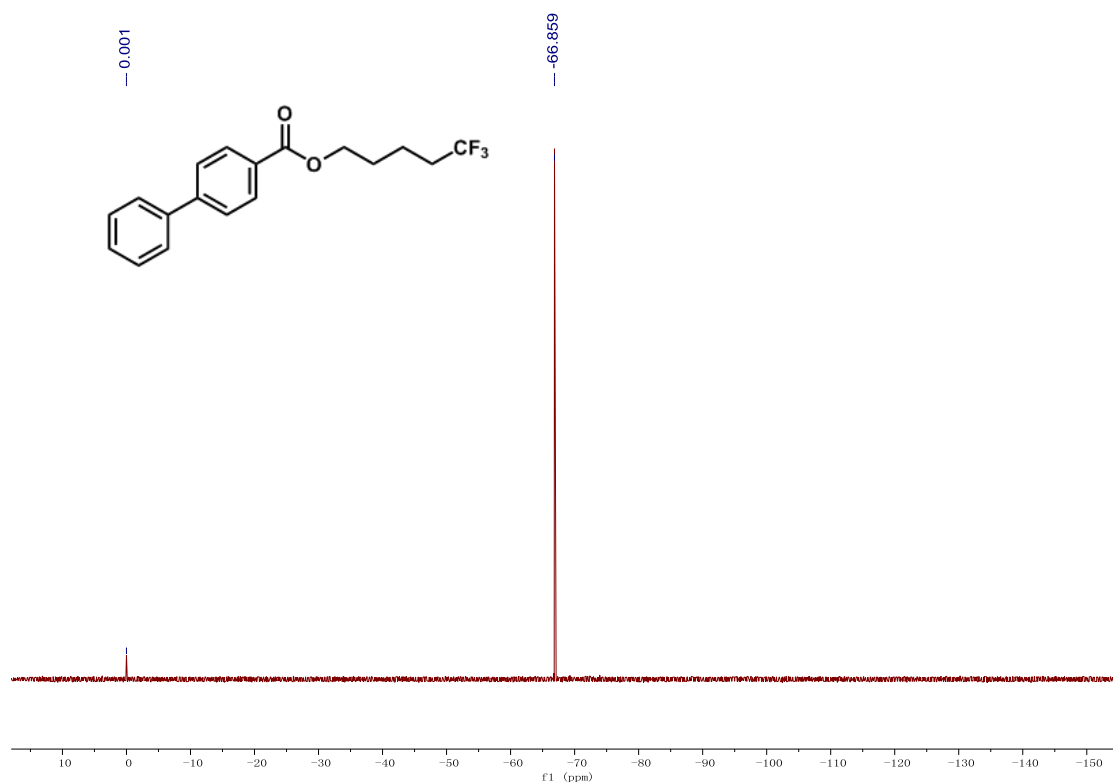

2-30

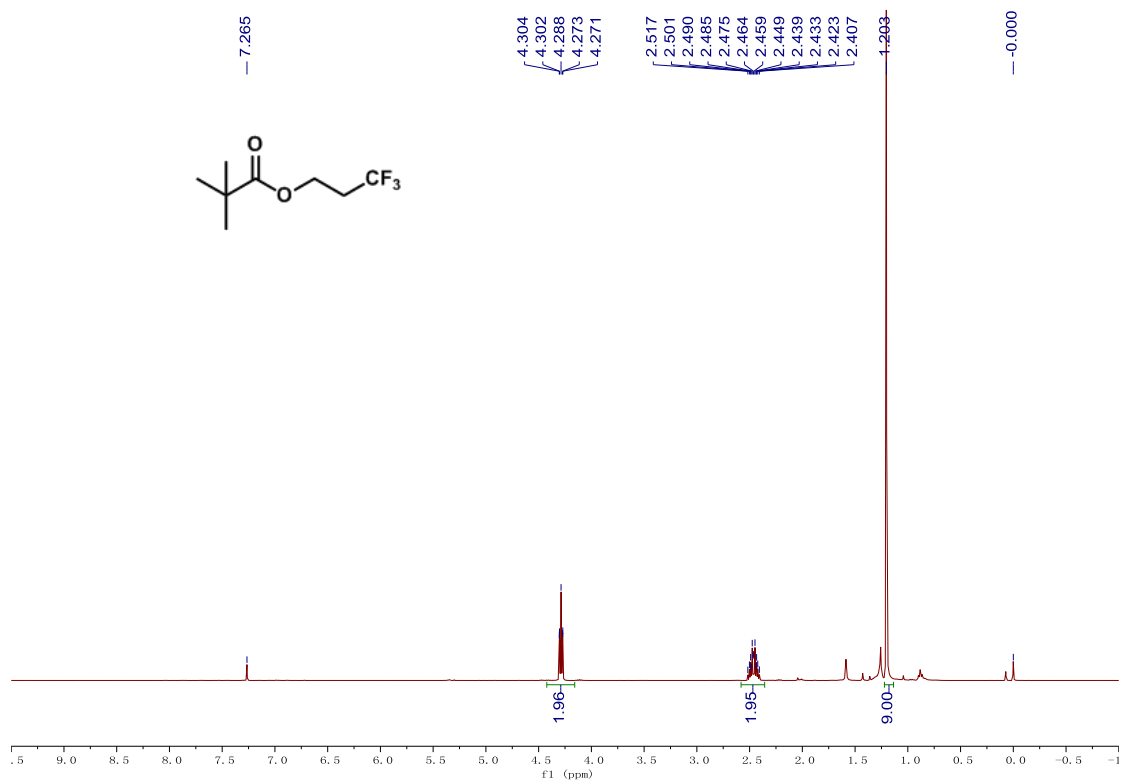

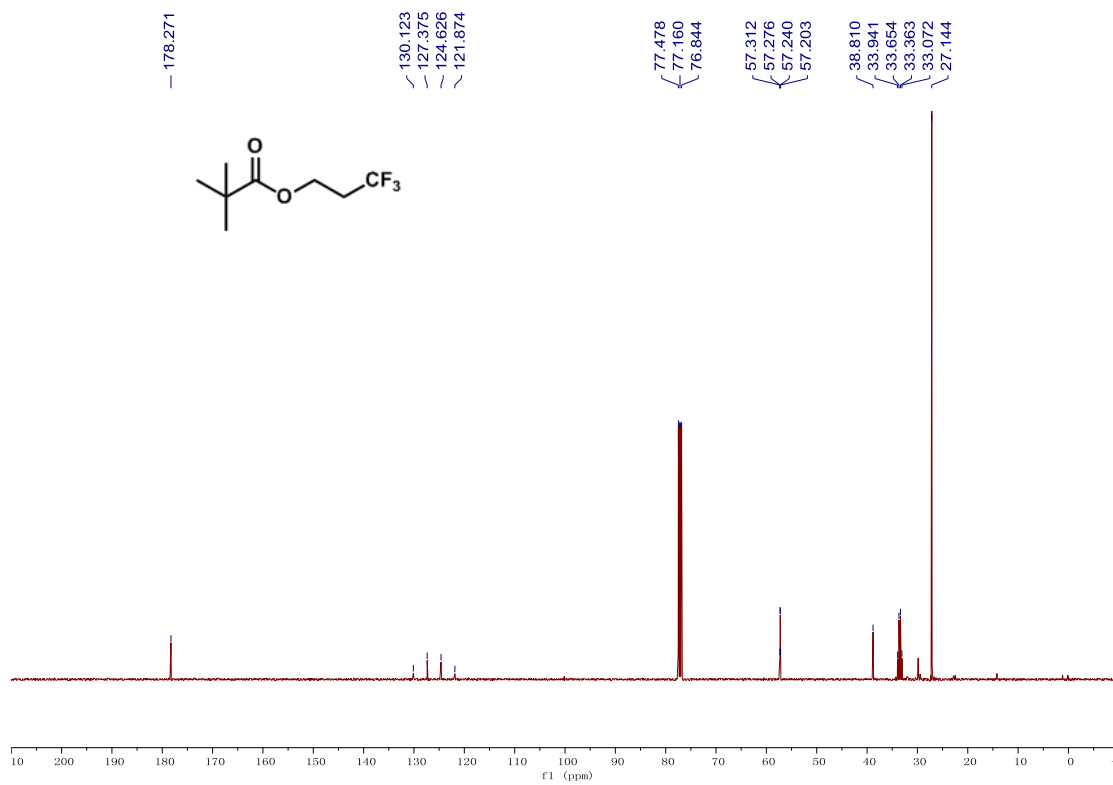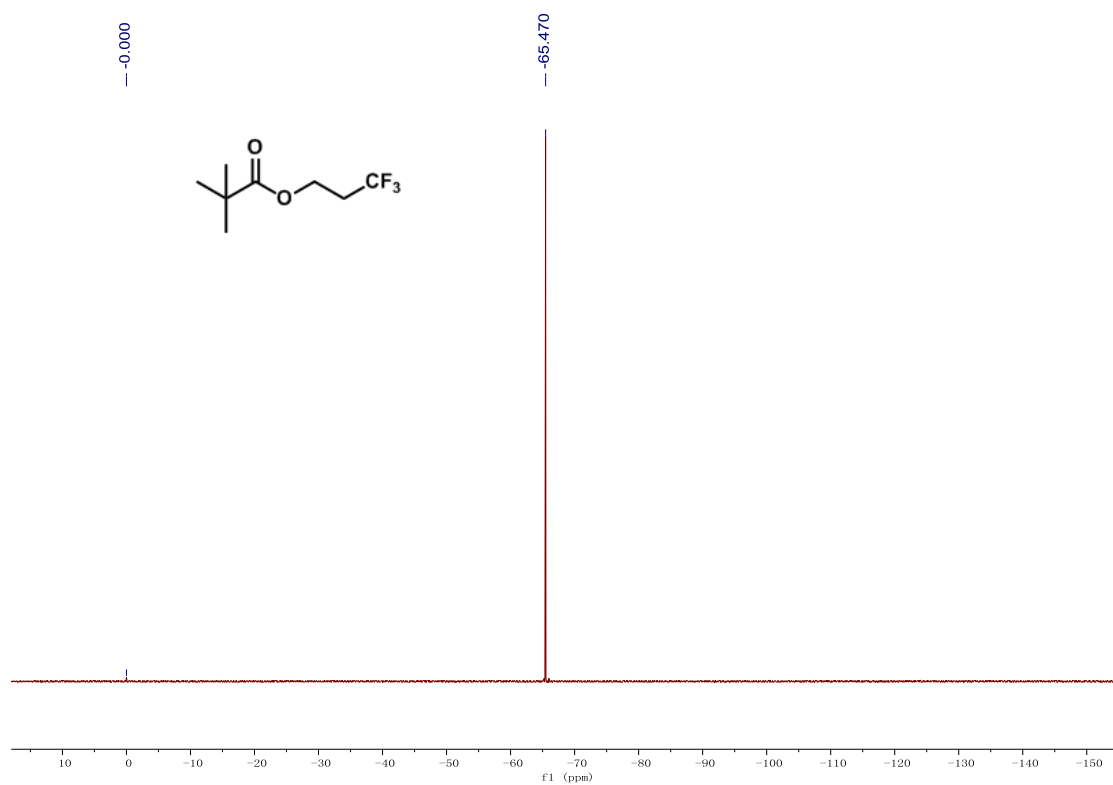

2-31

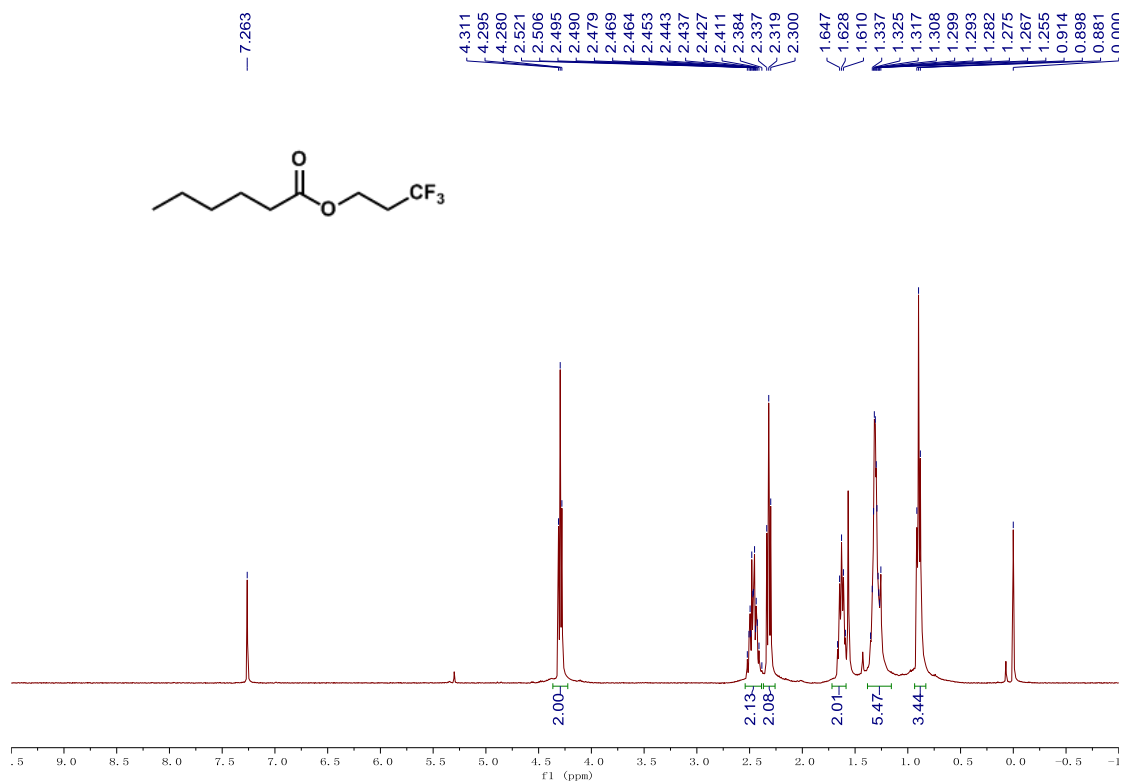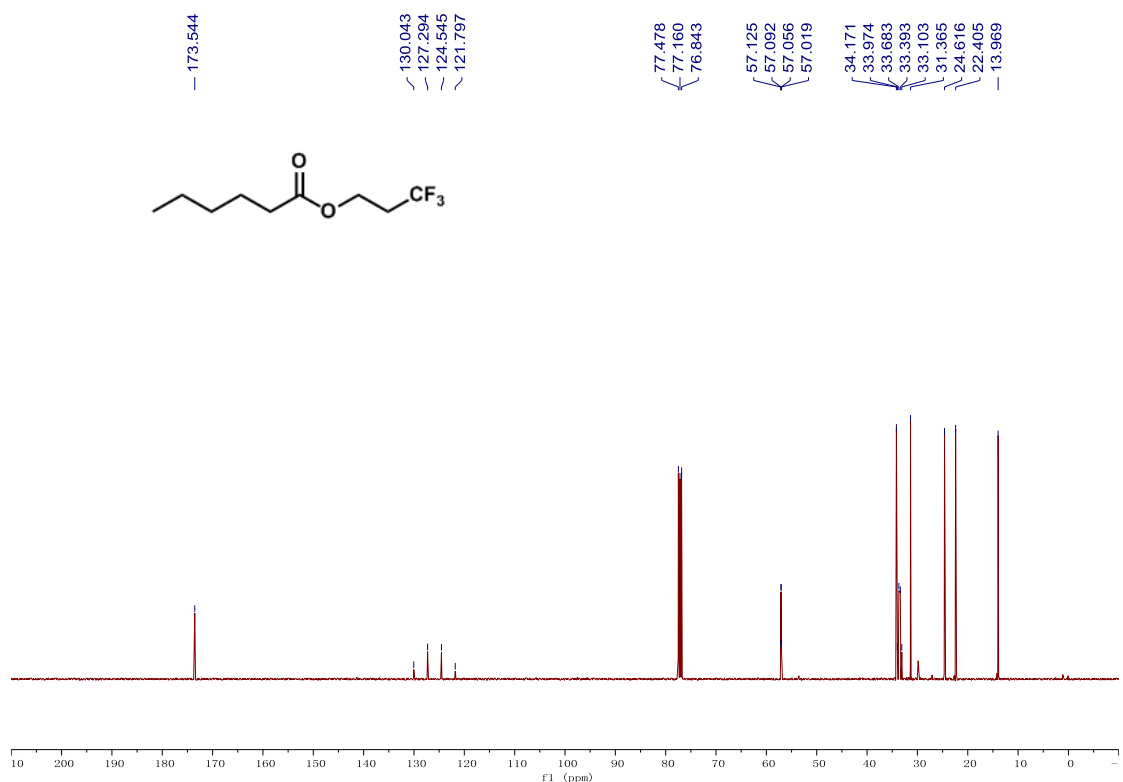

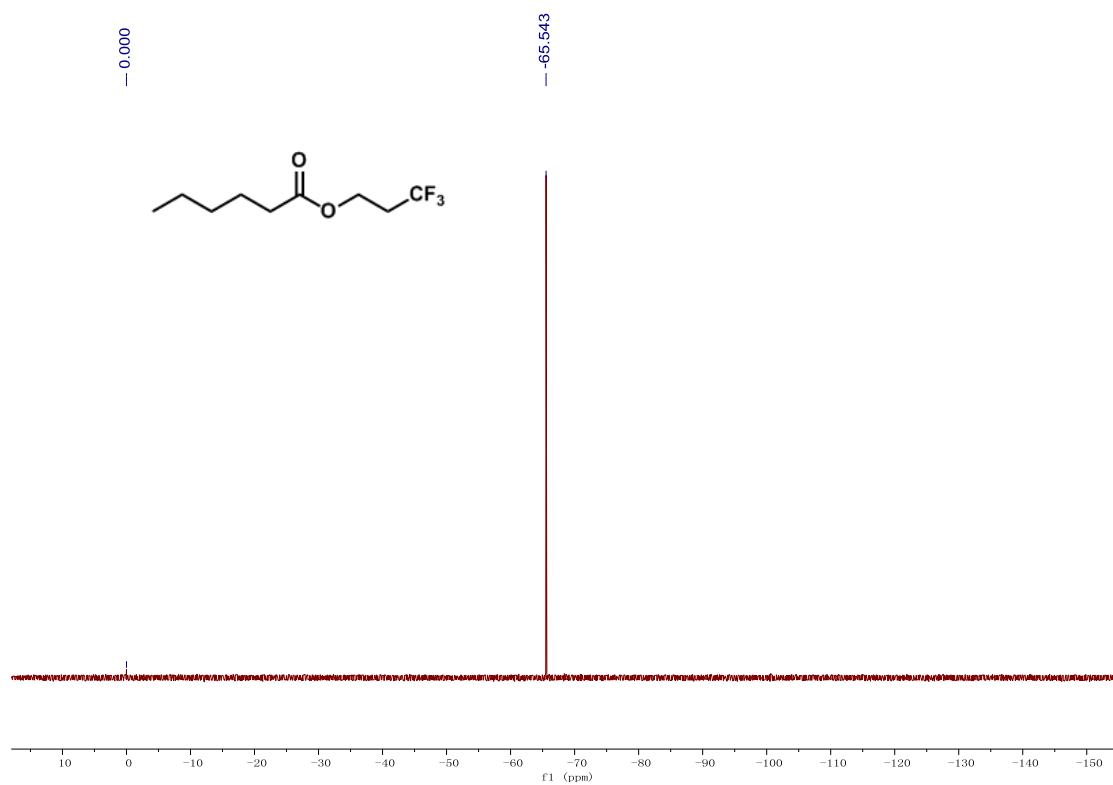

2-32

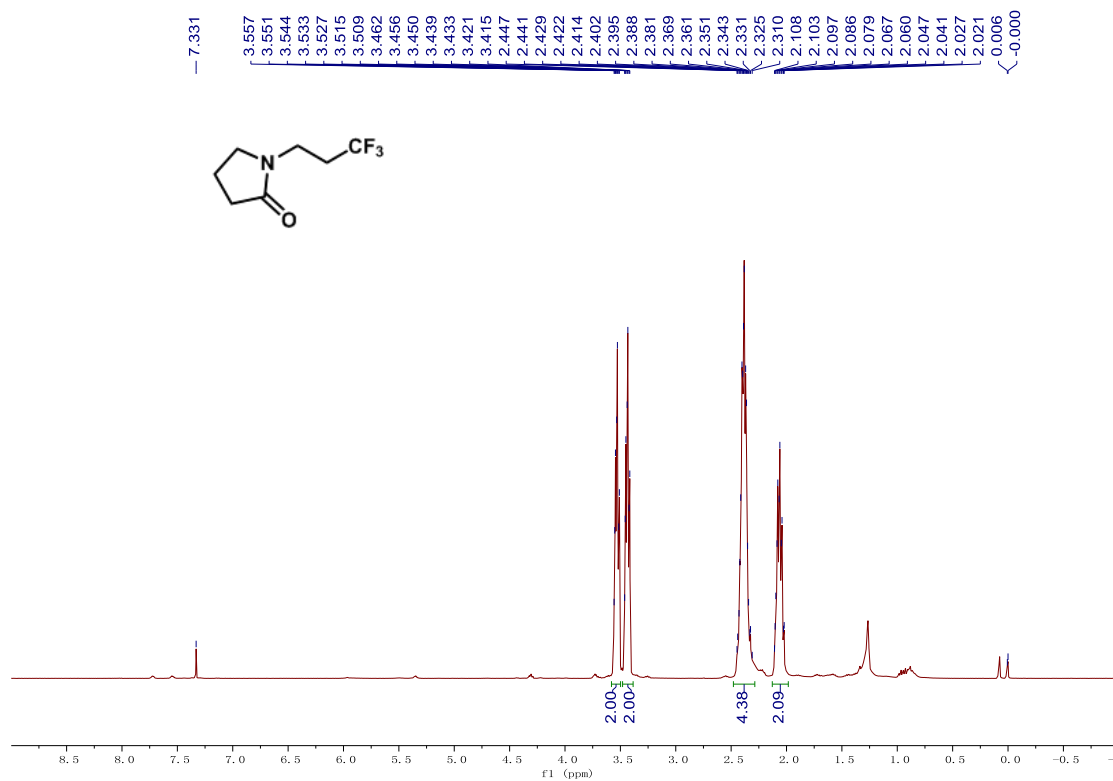

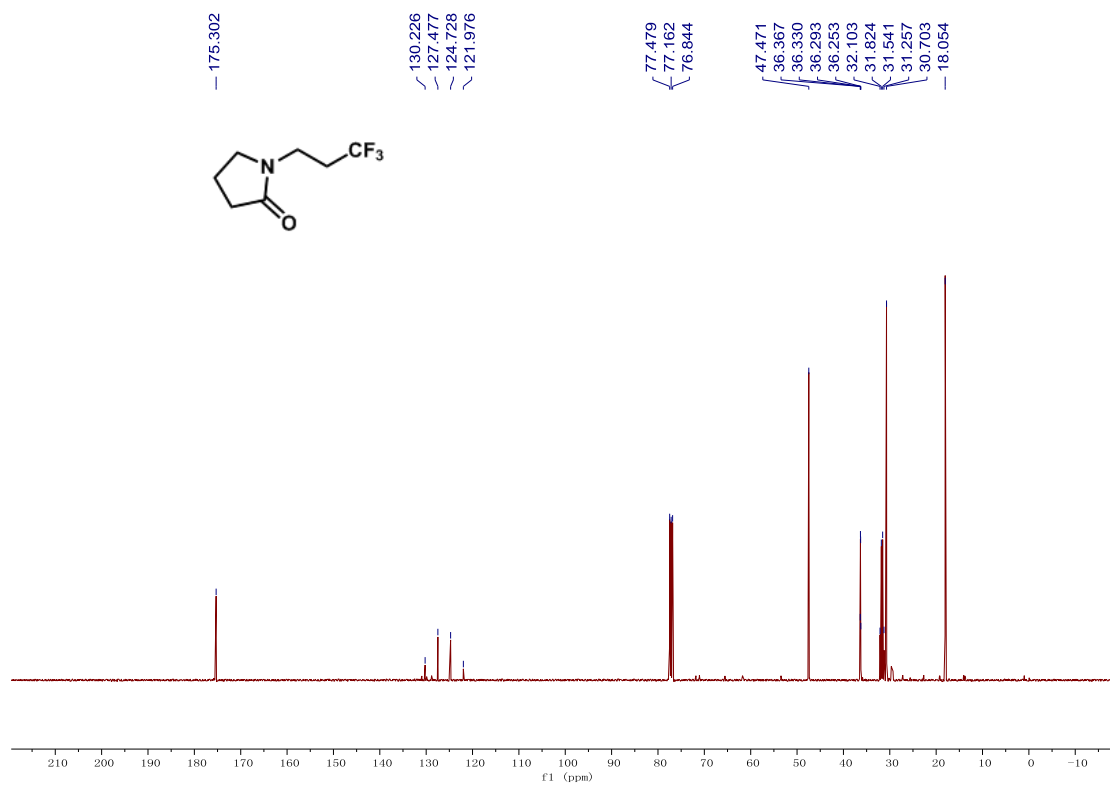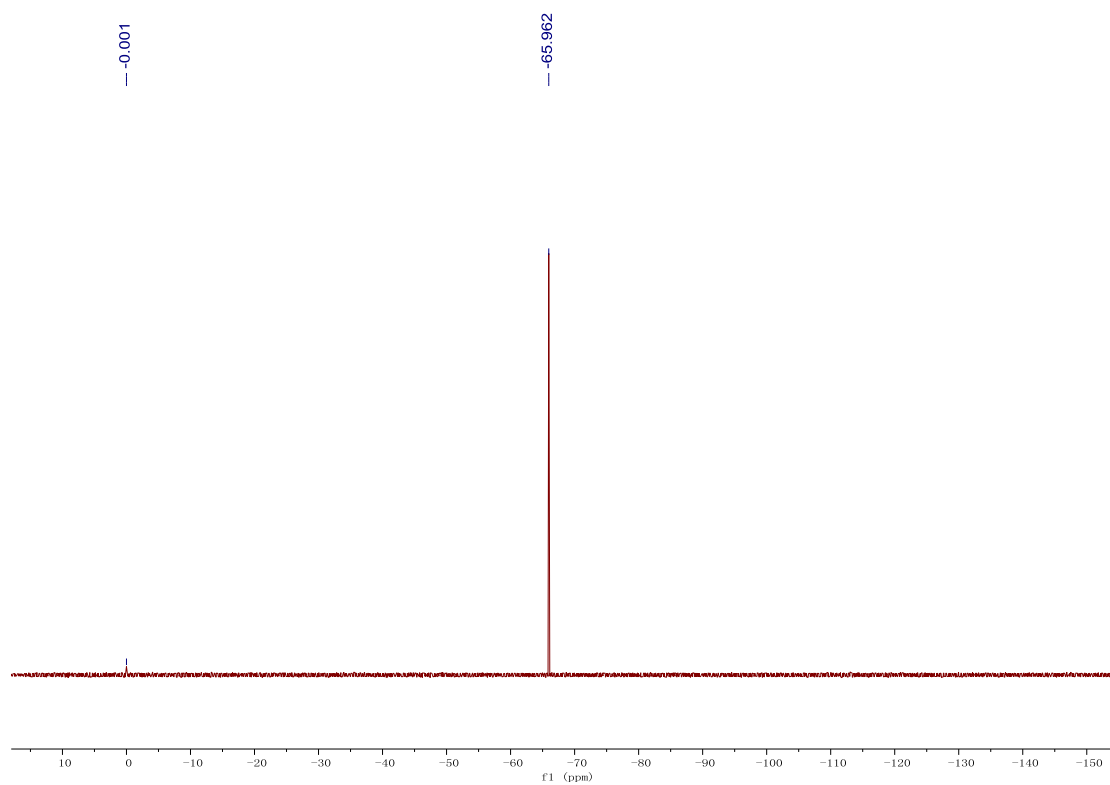



2-33

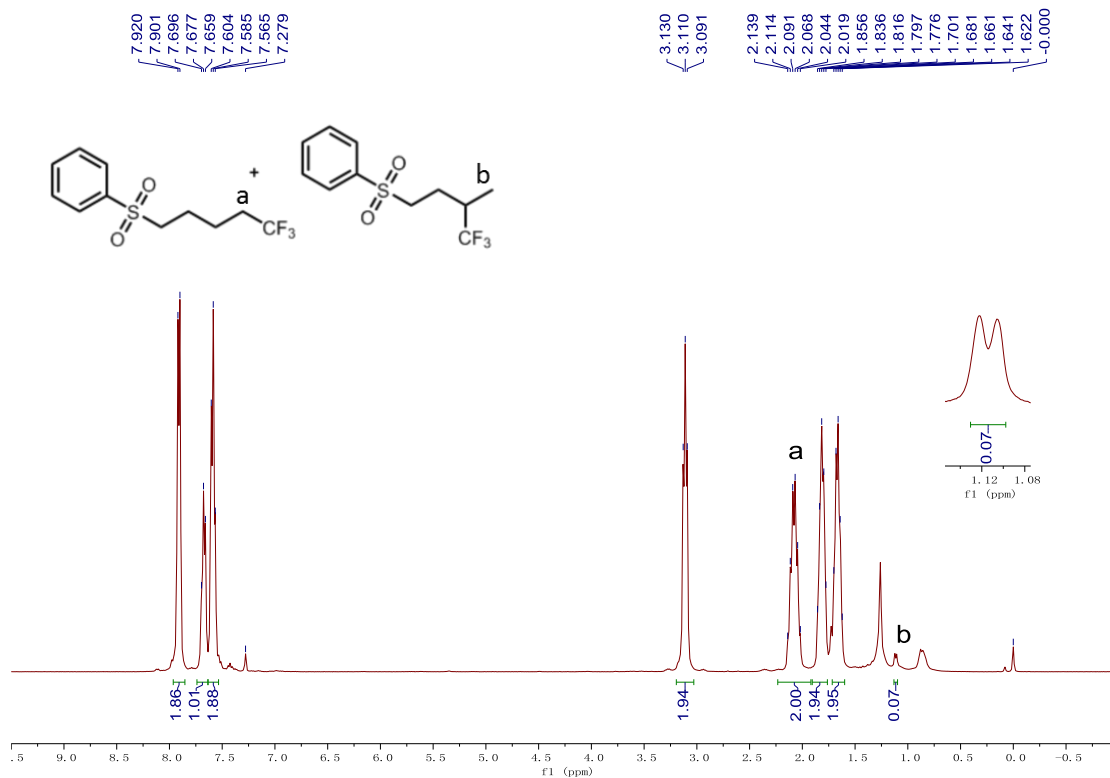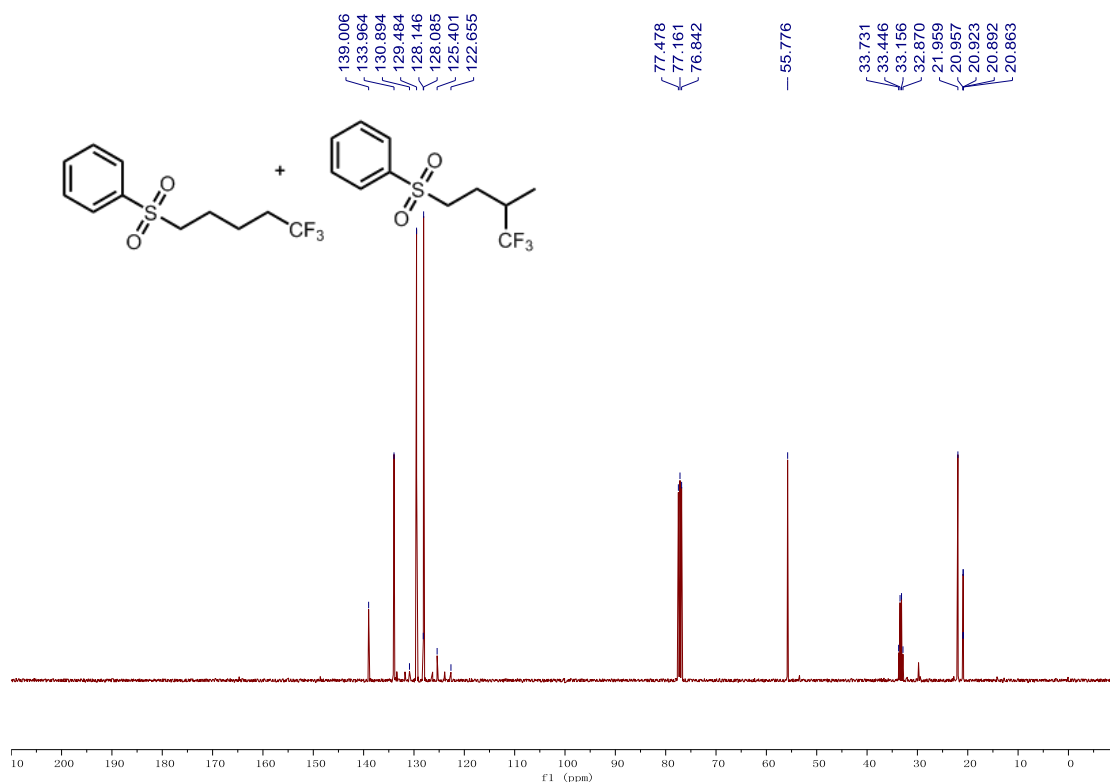

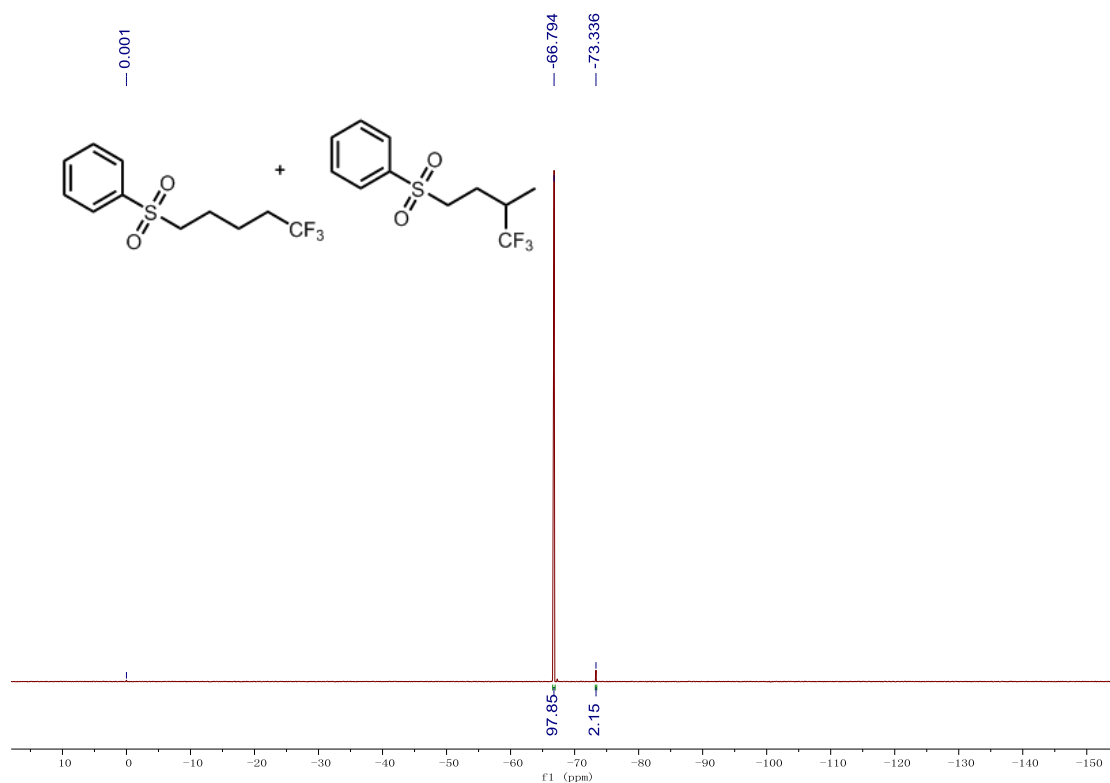

2-34

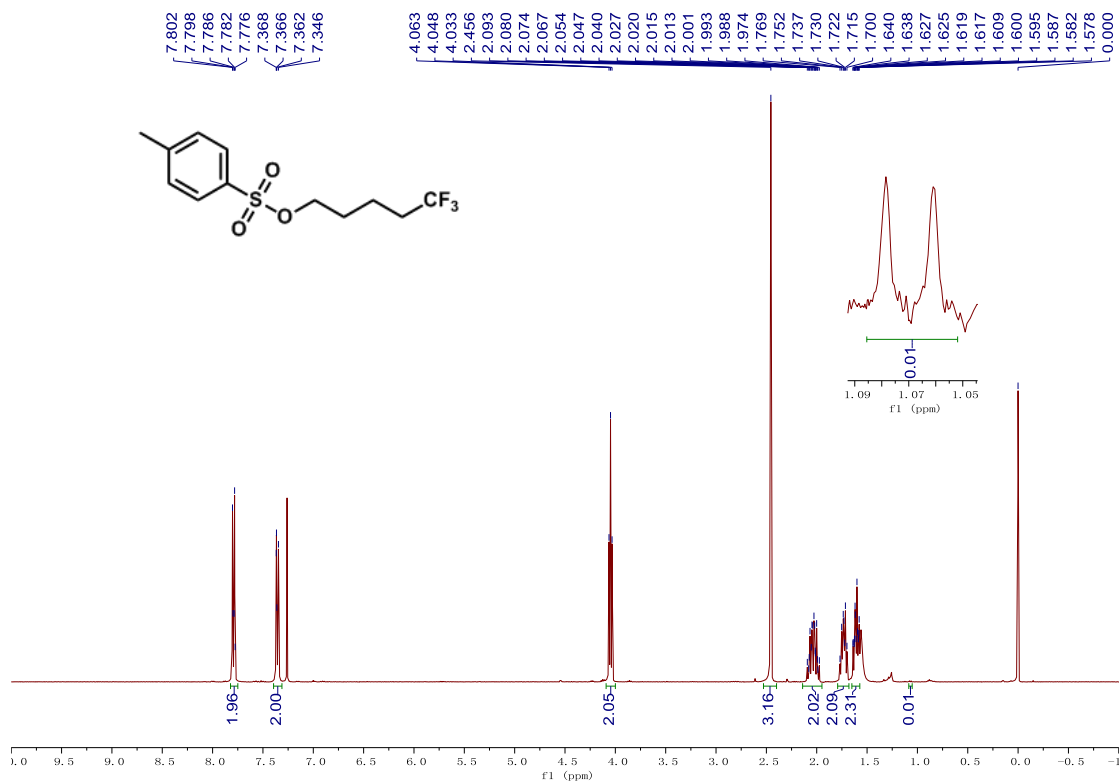

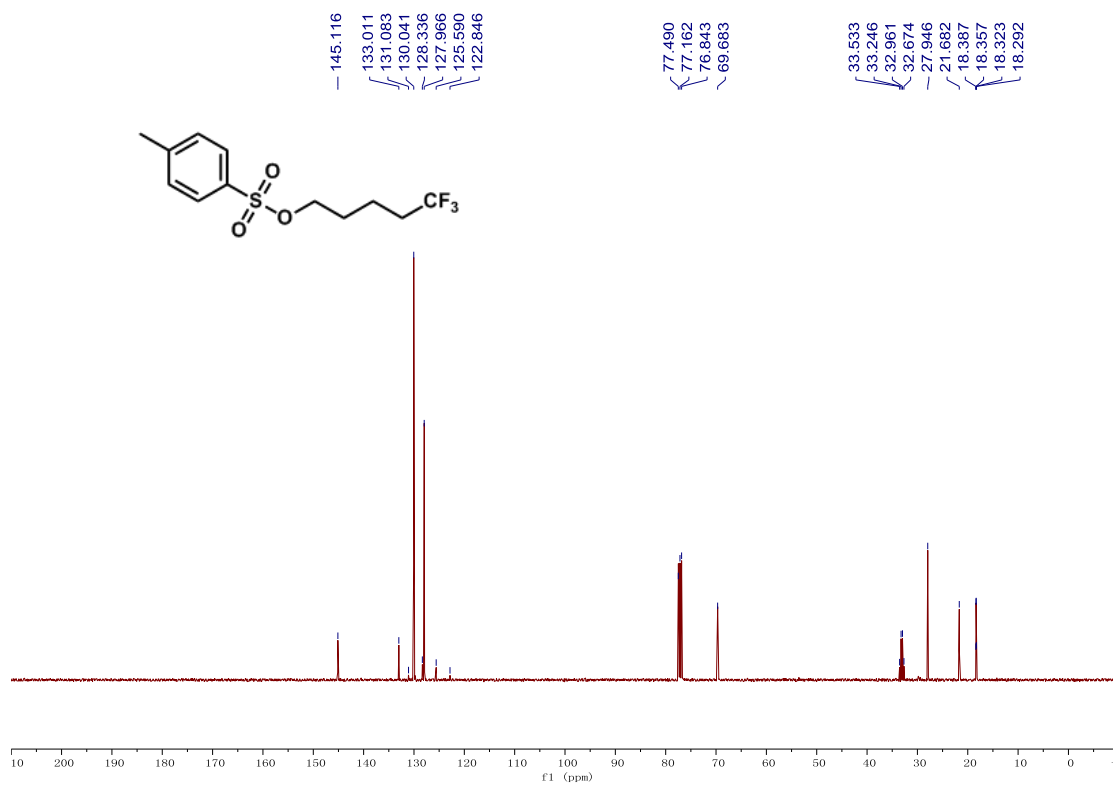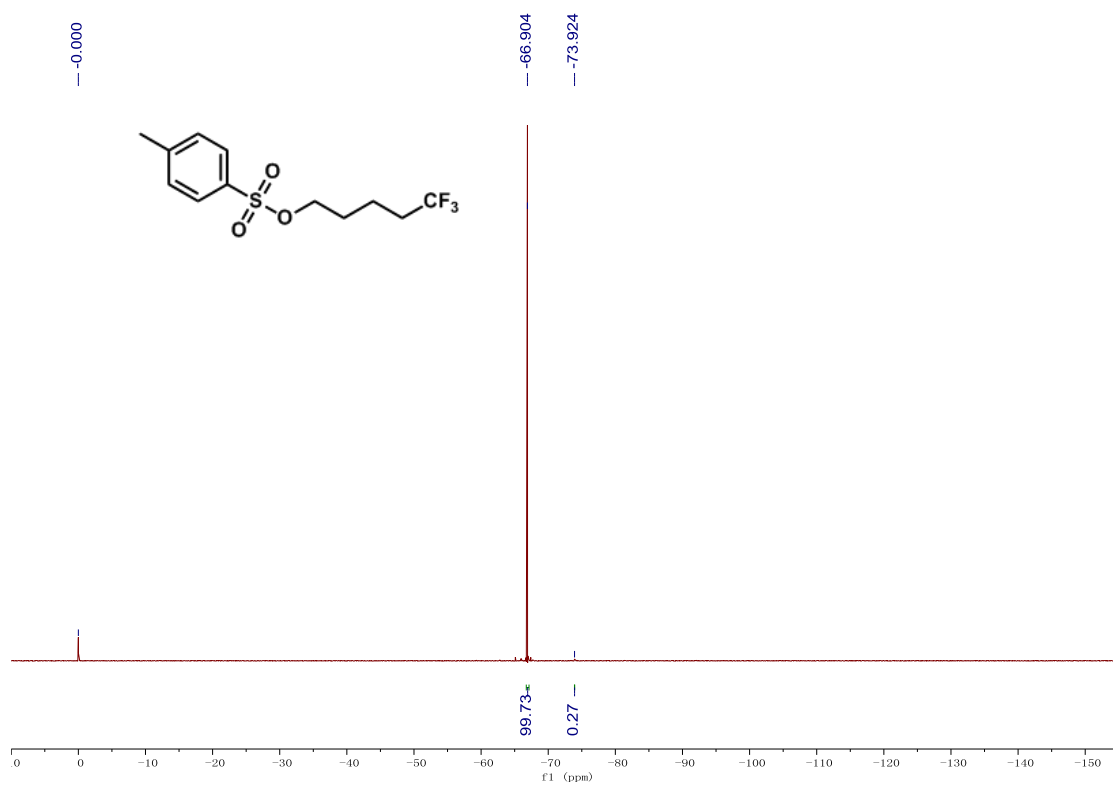

2-35

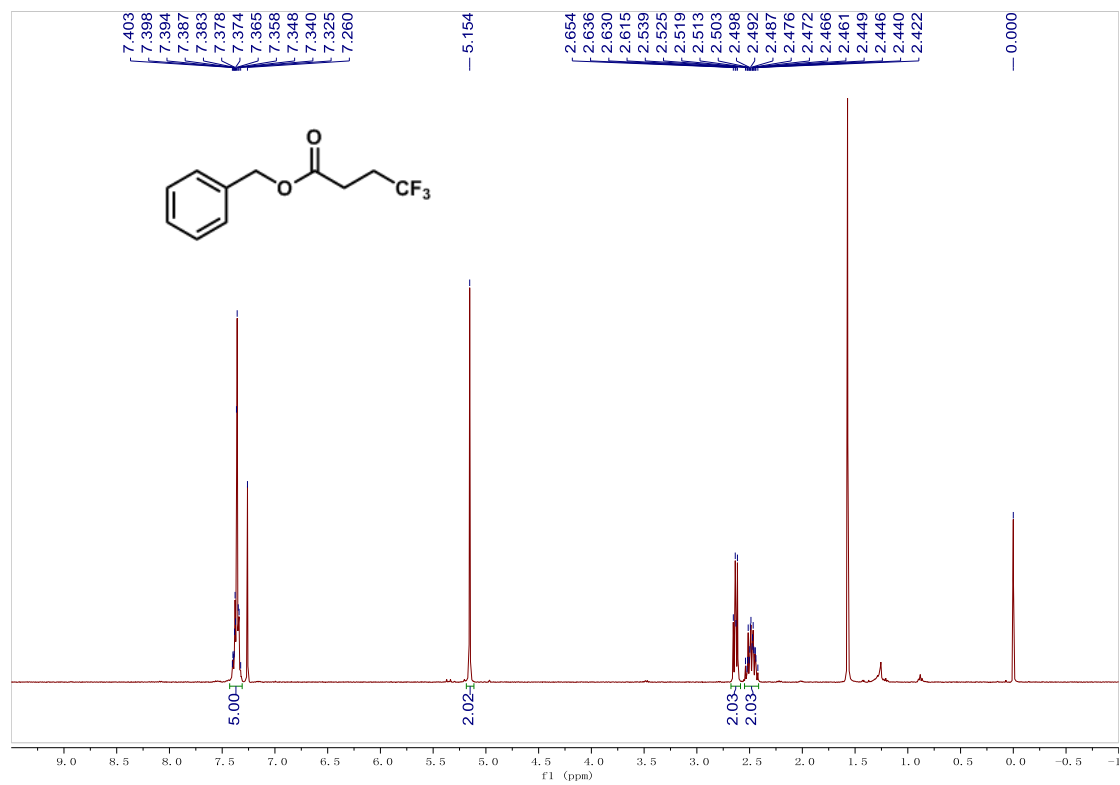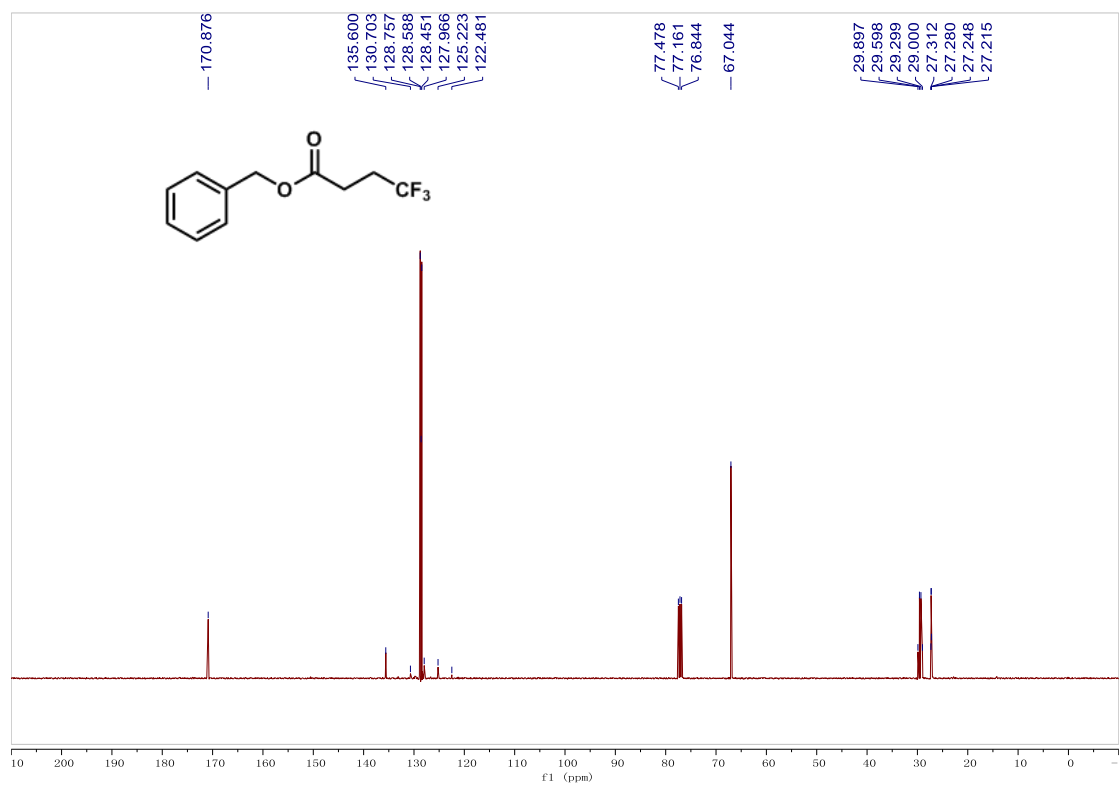

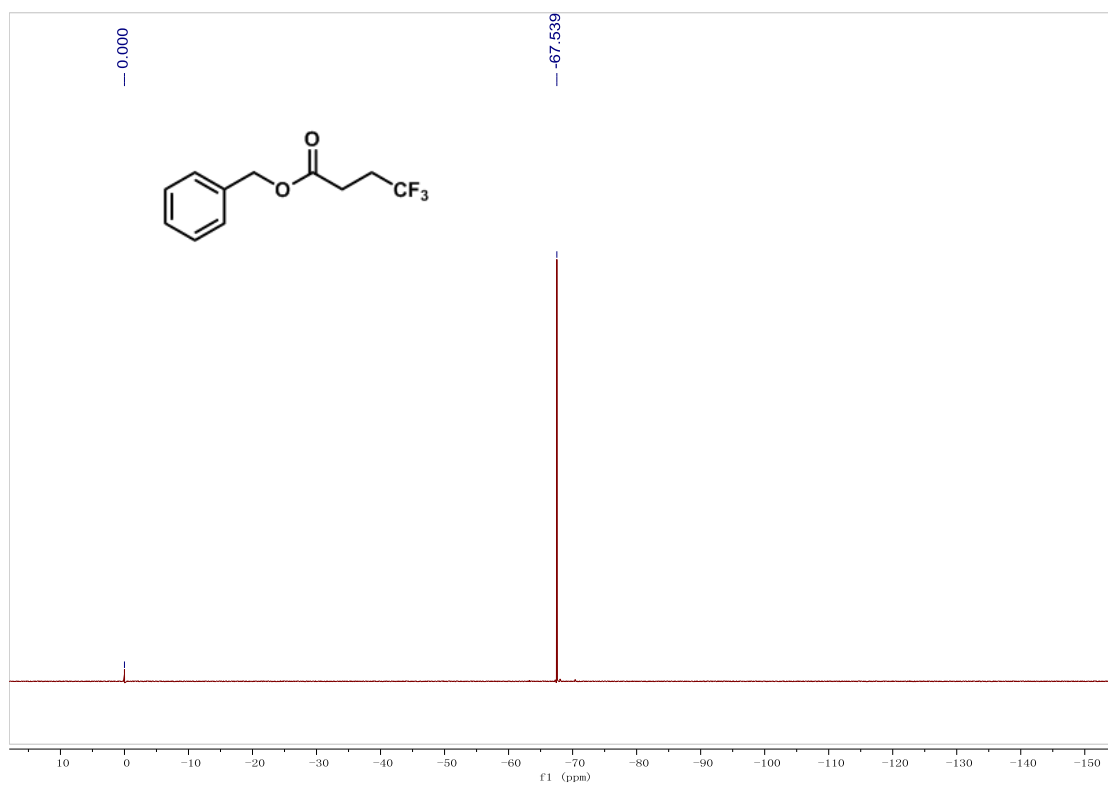

2-36

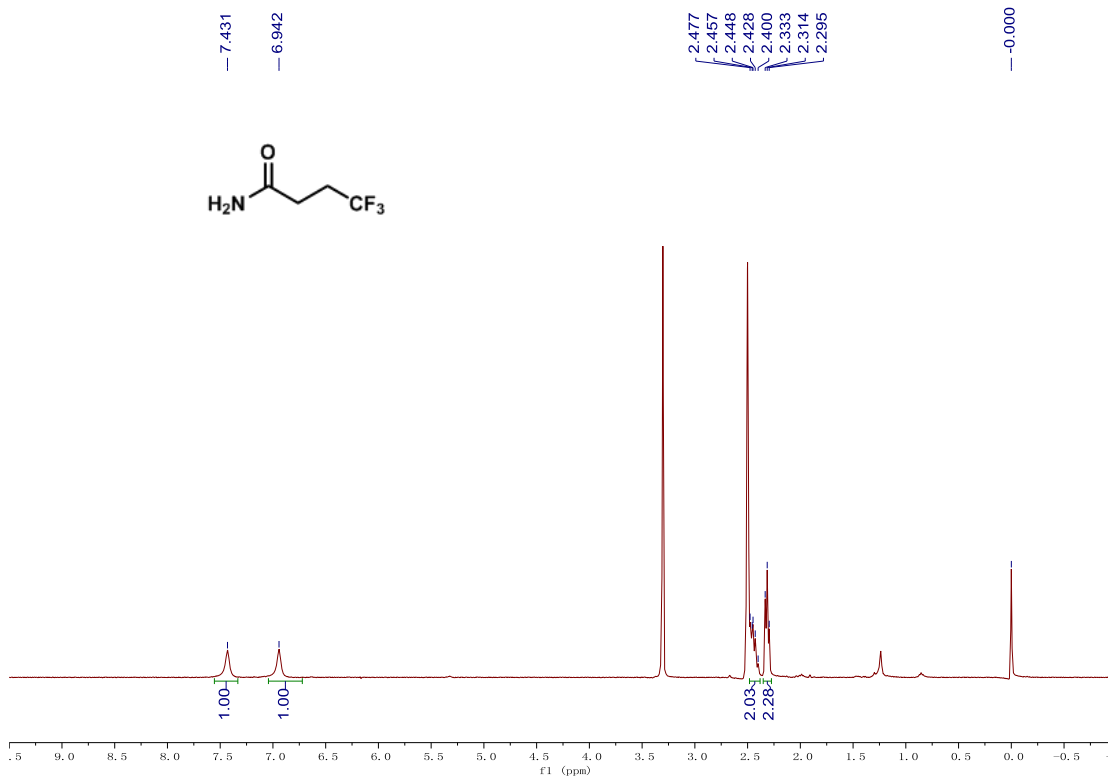

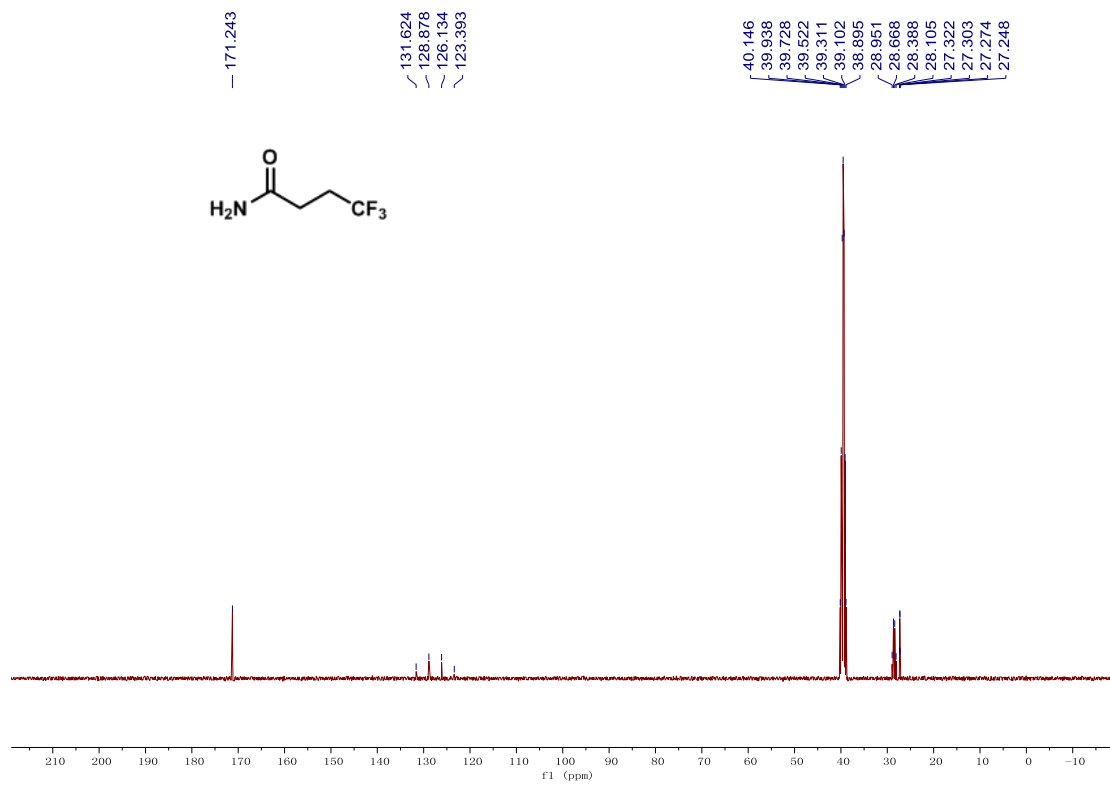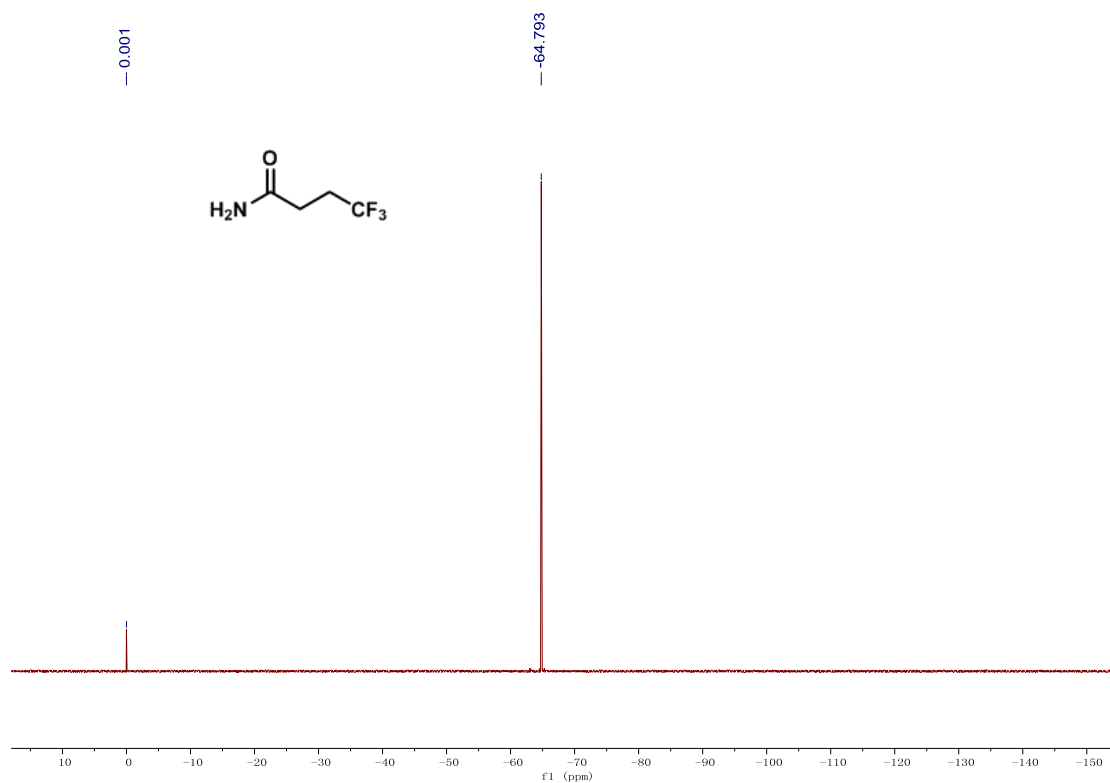

2-37

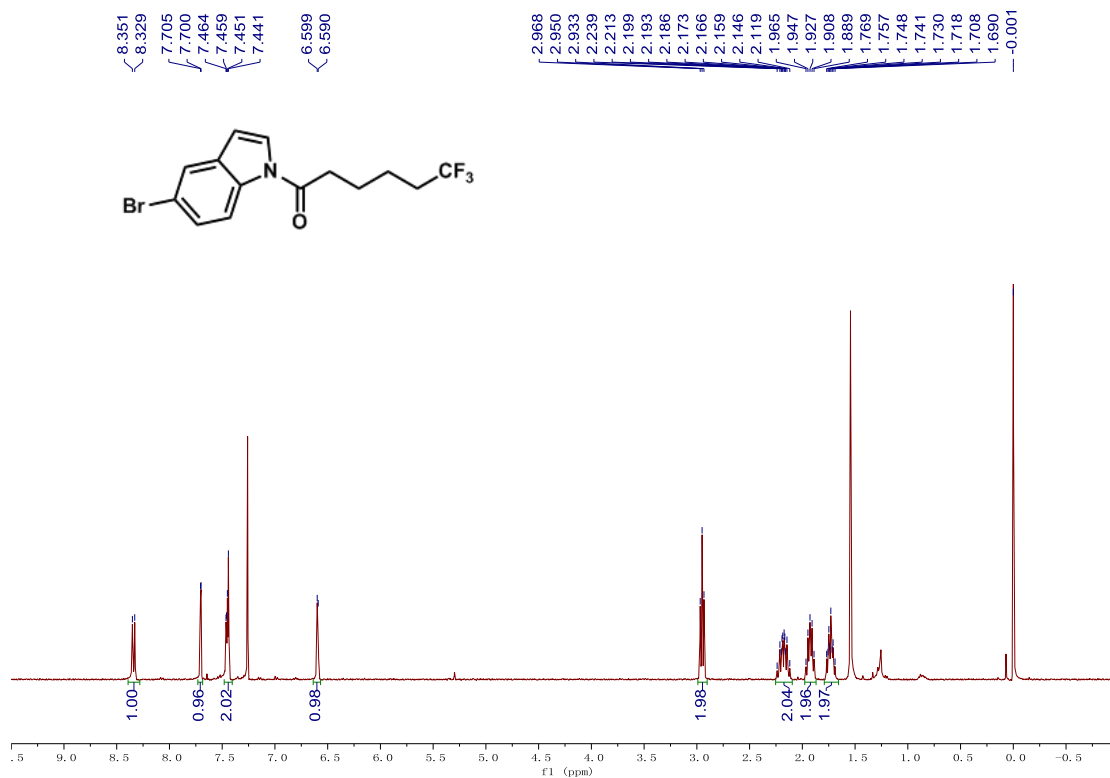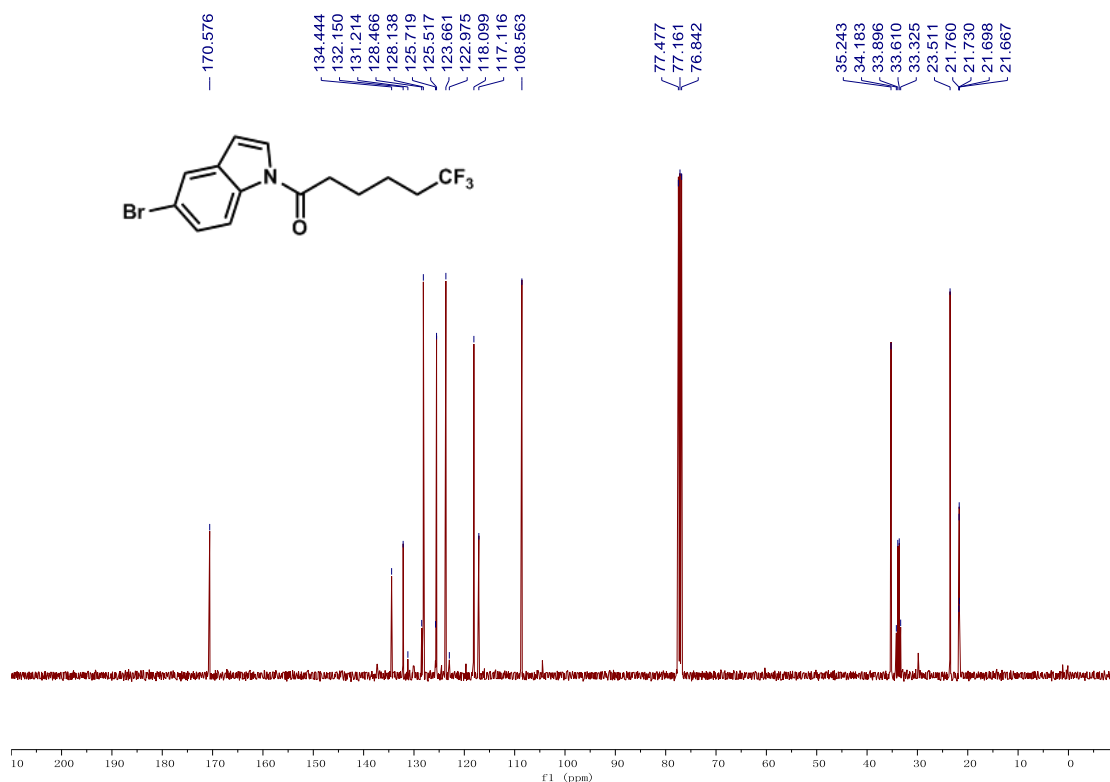

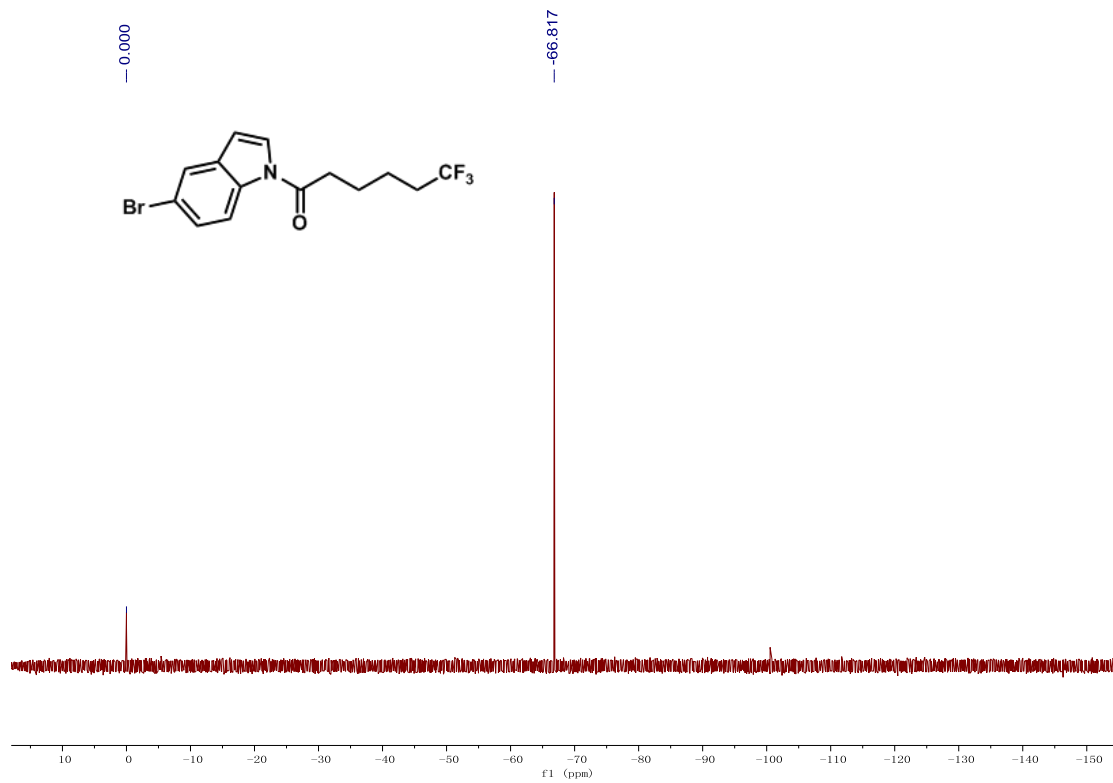

2-38

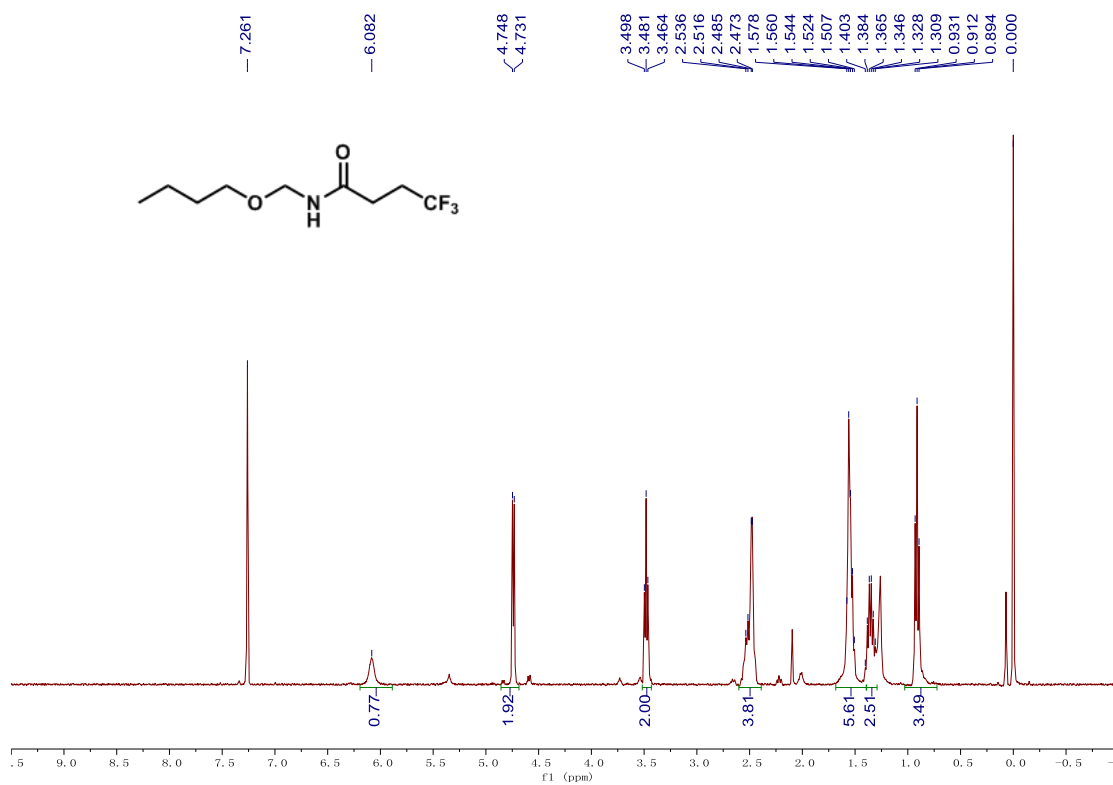



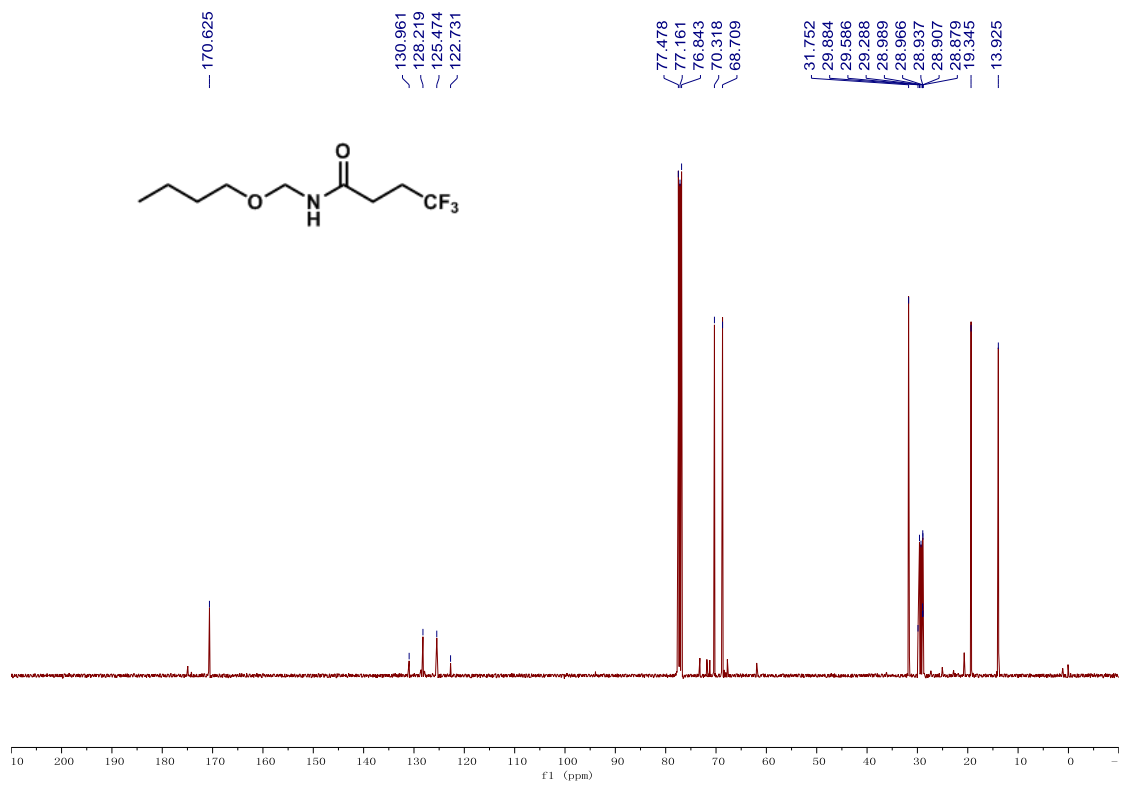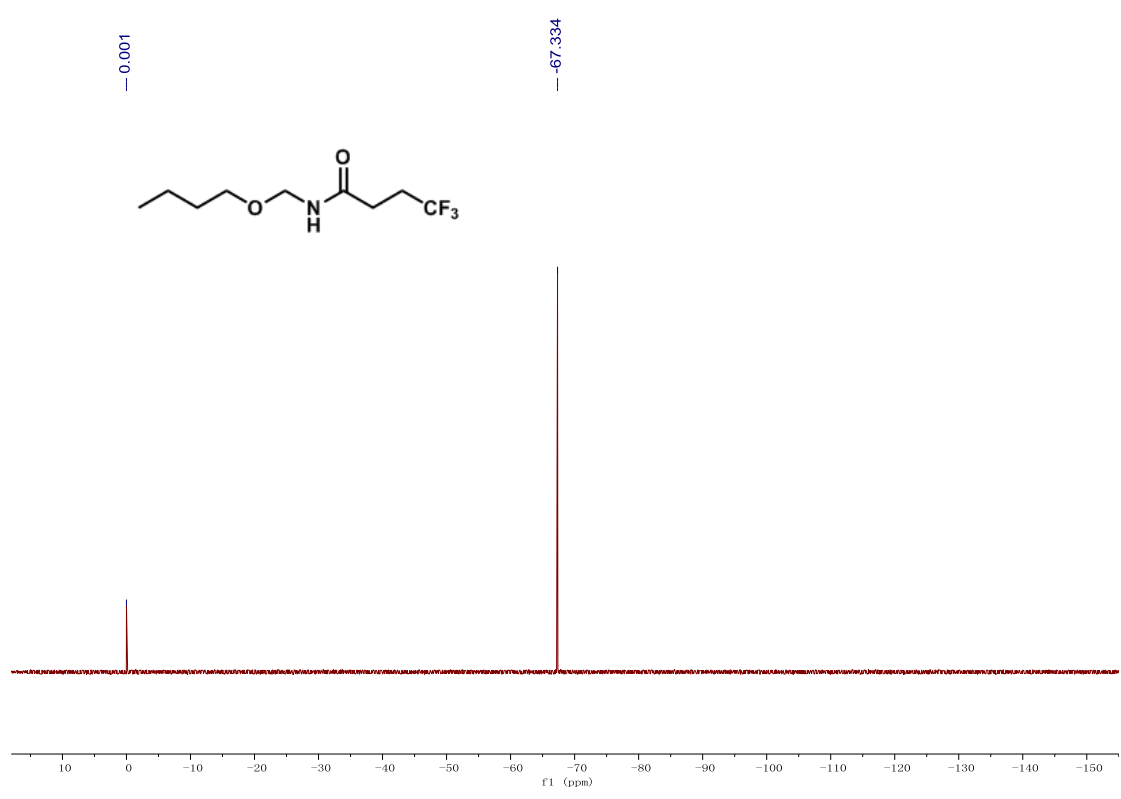

2-39

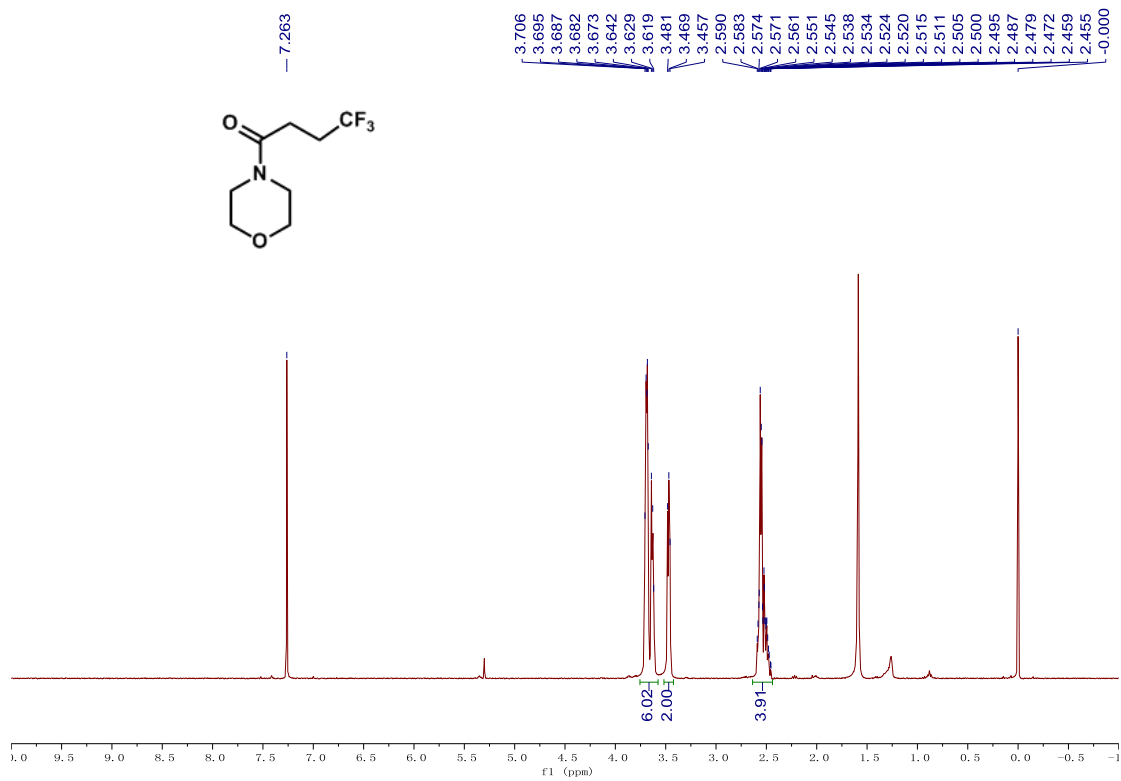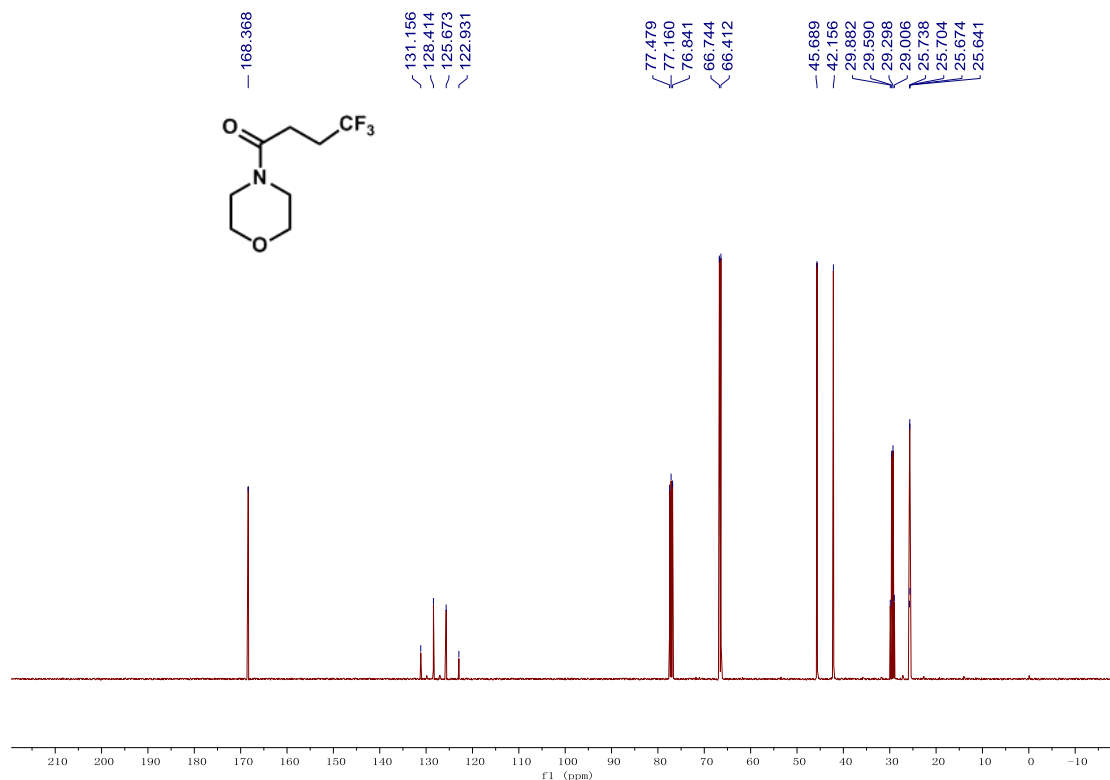

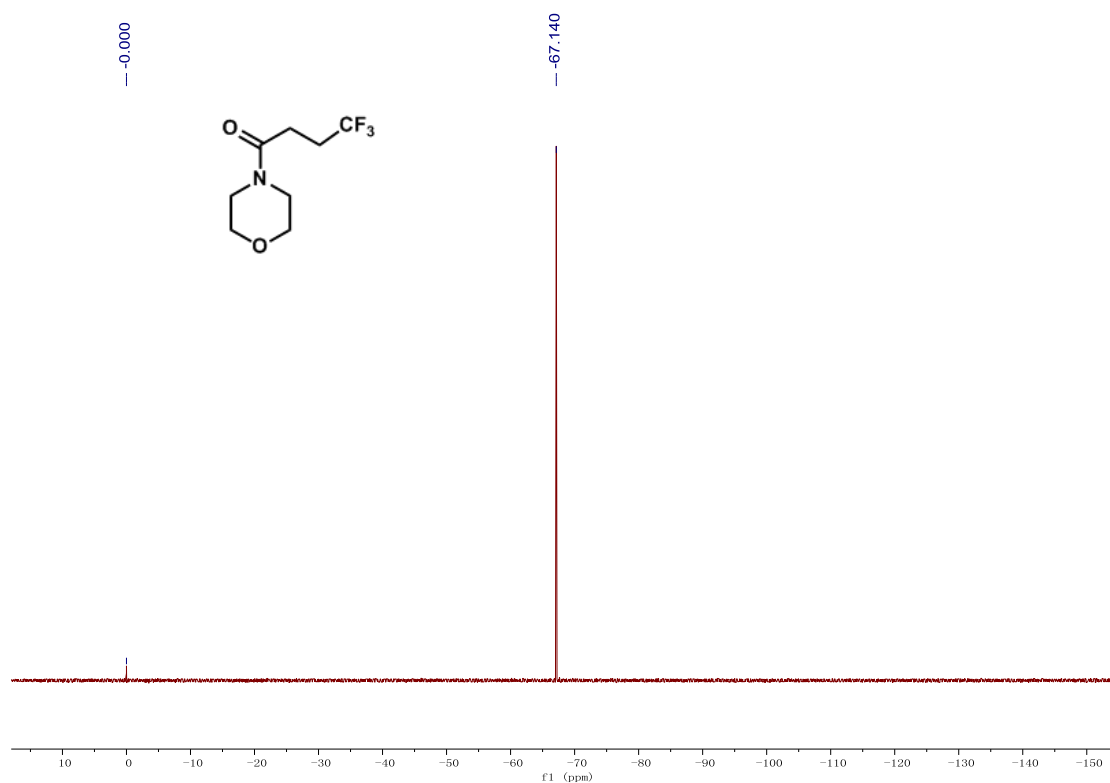

2-40

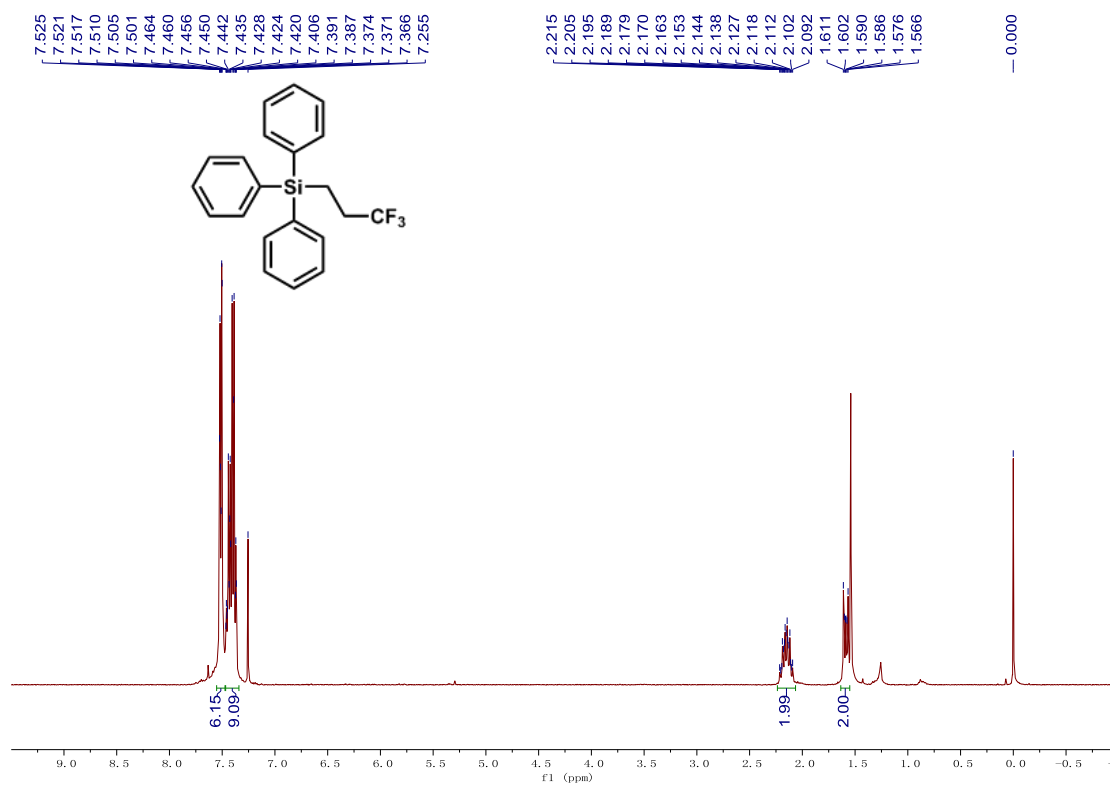

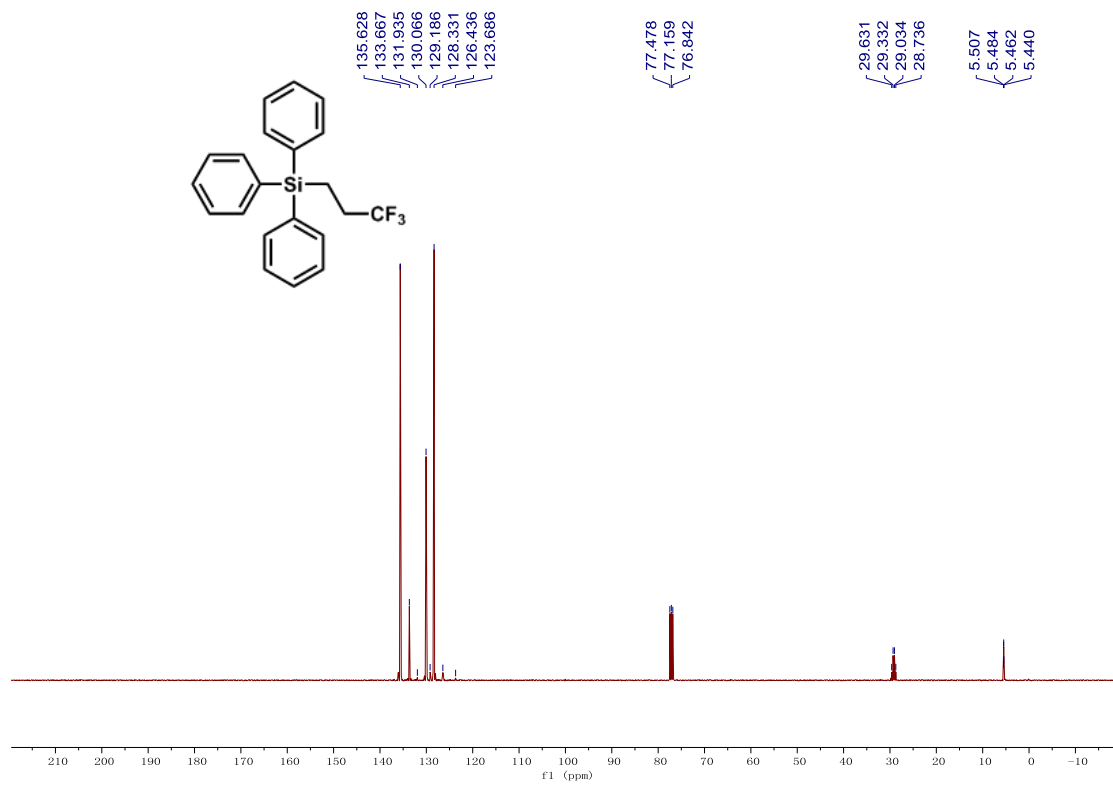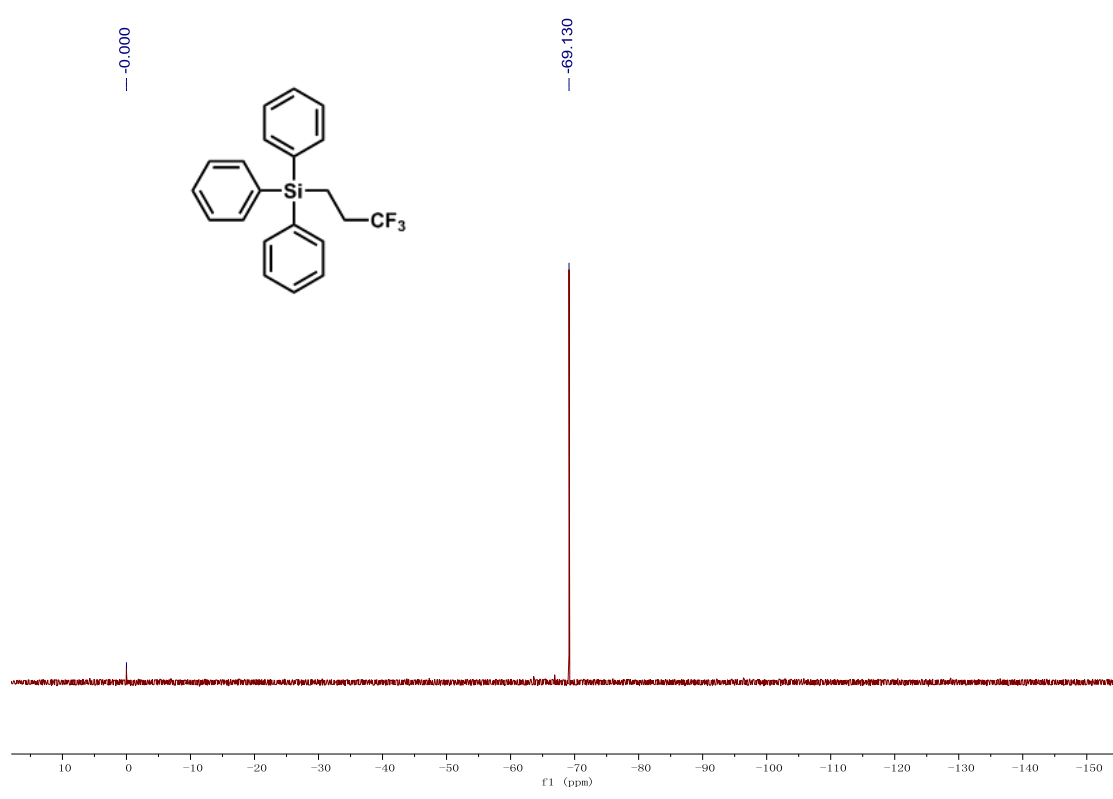

2-41

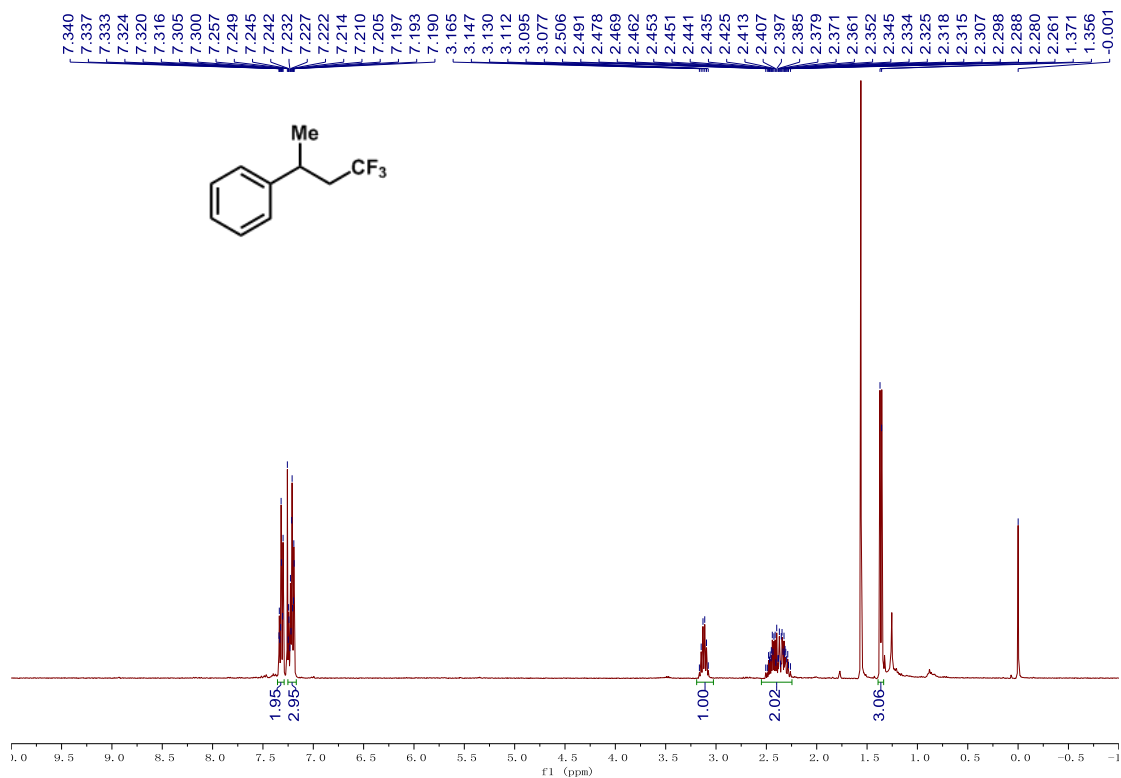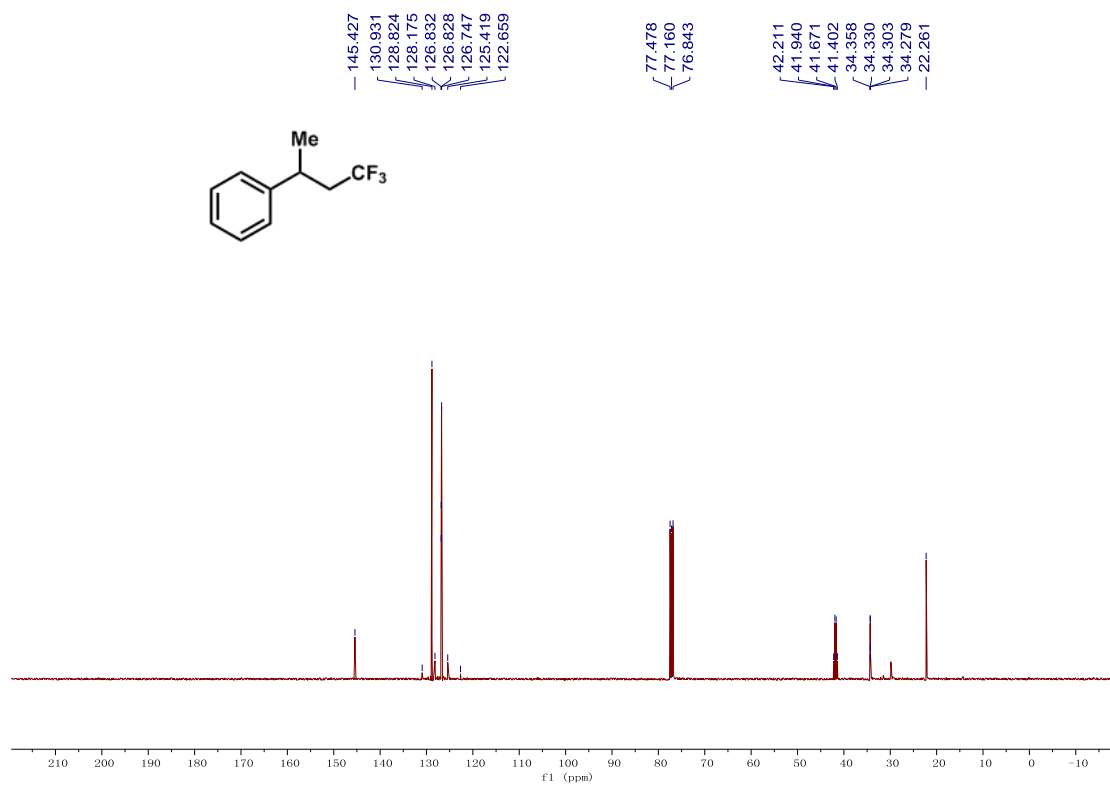

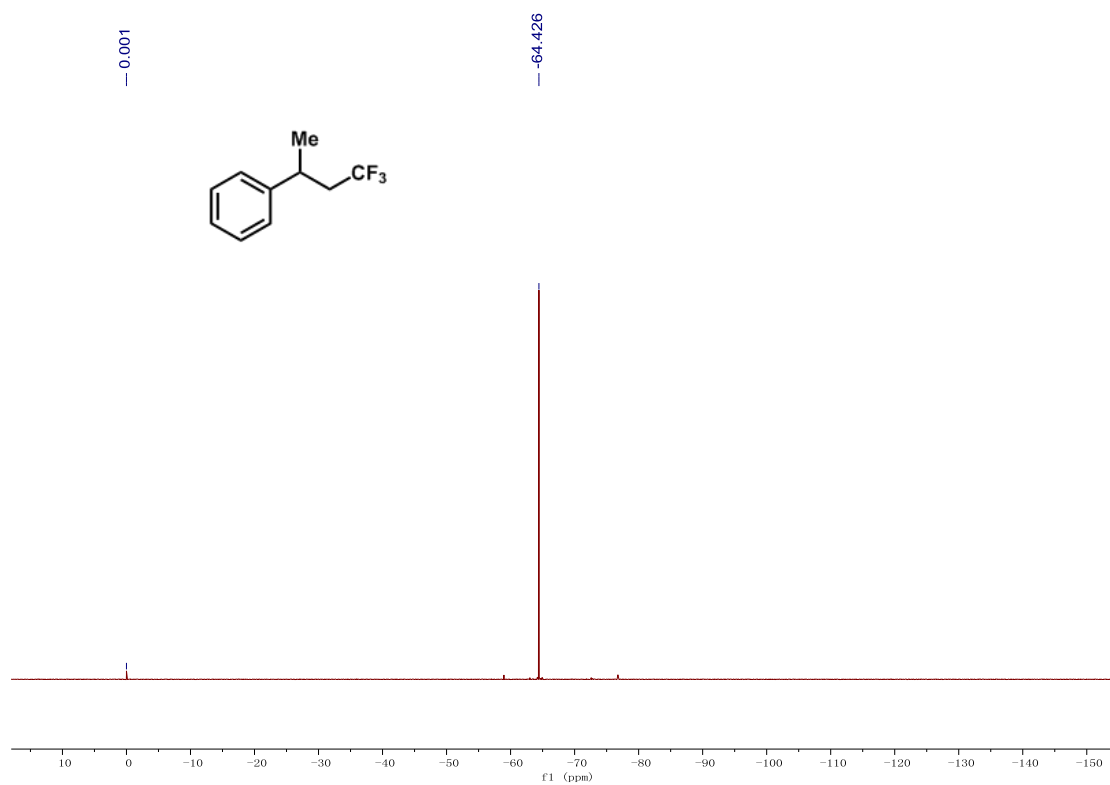

2-42

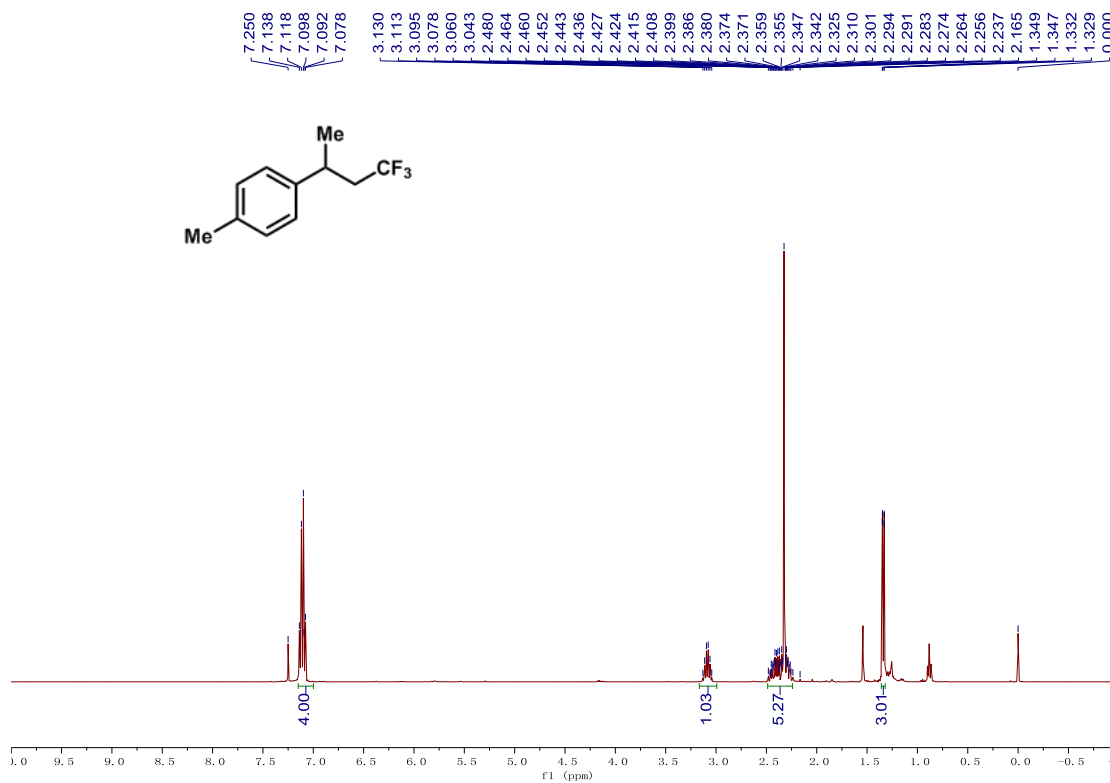

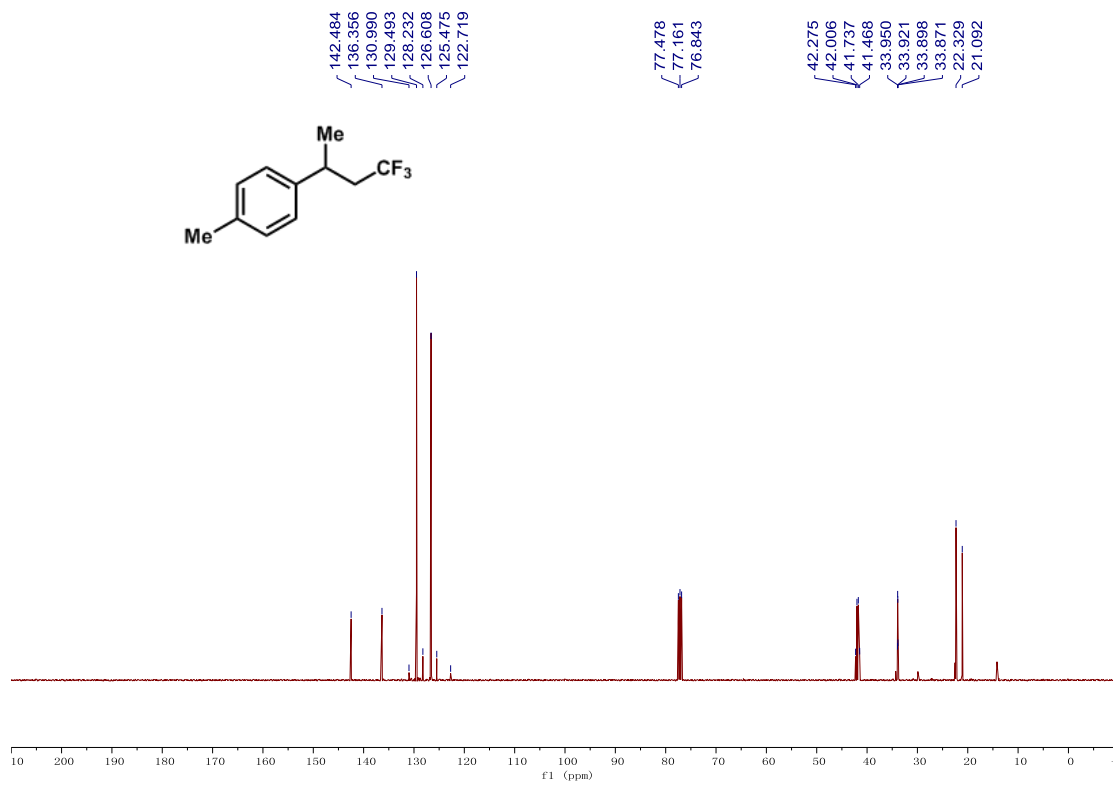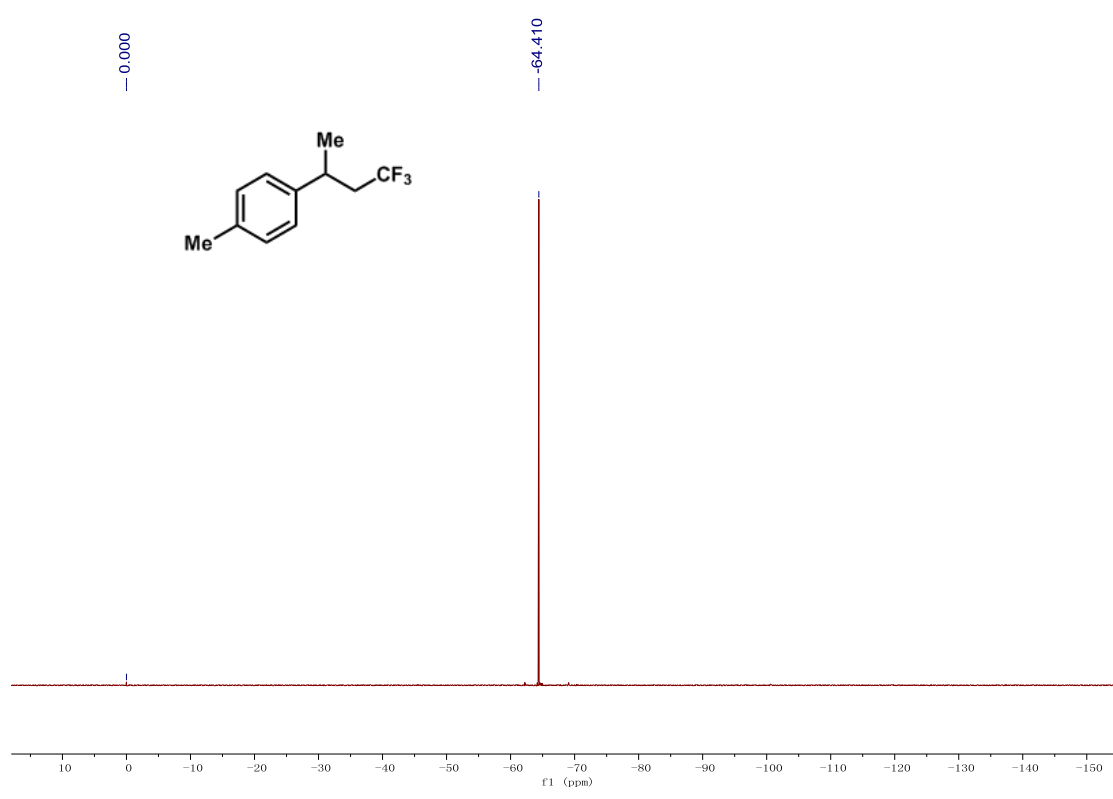

2-43

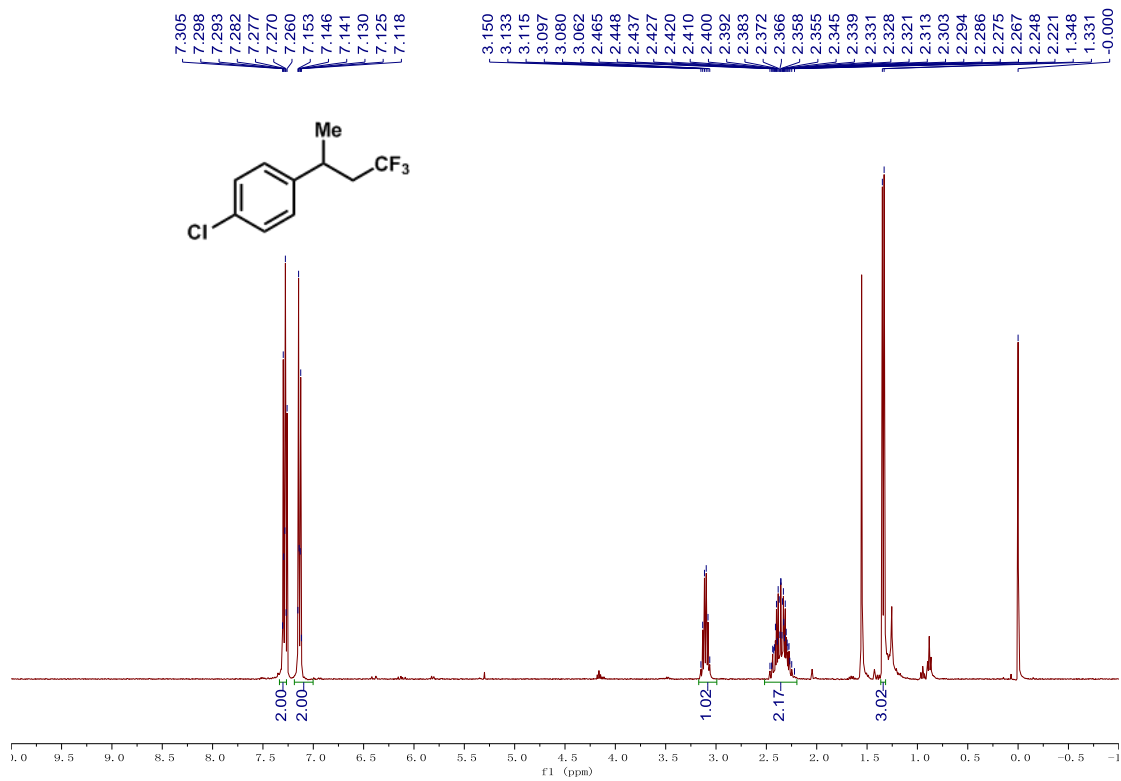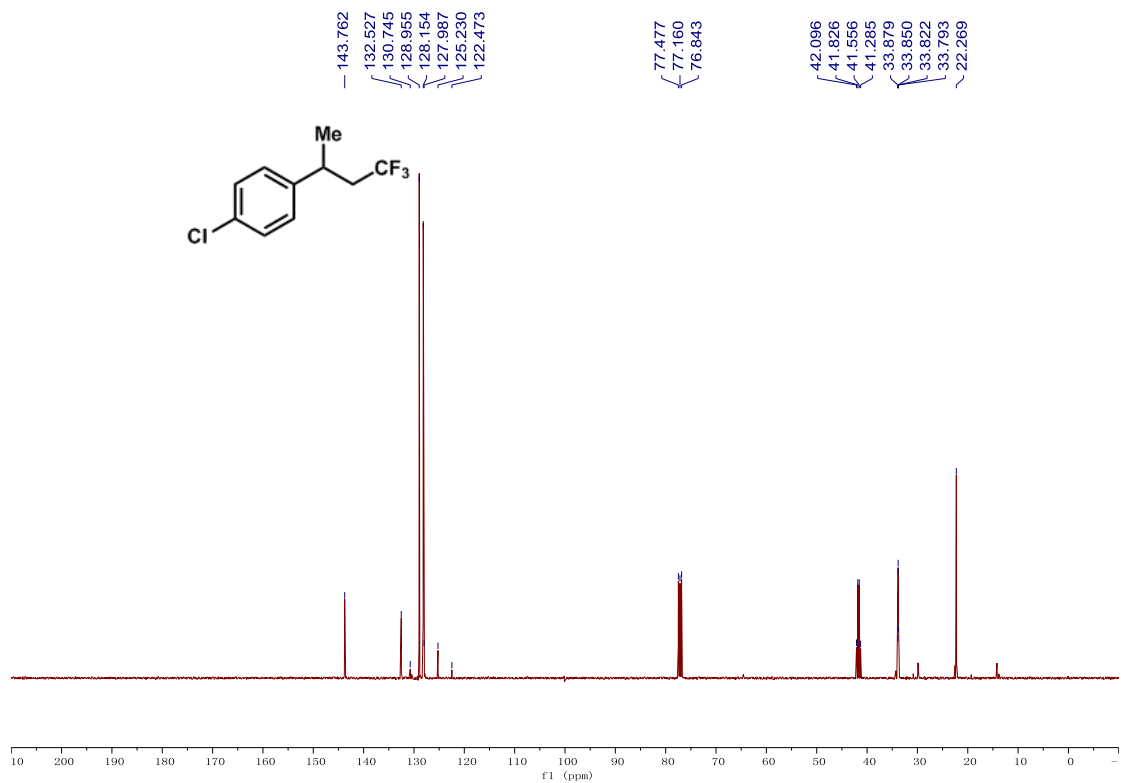



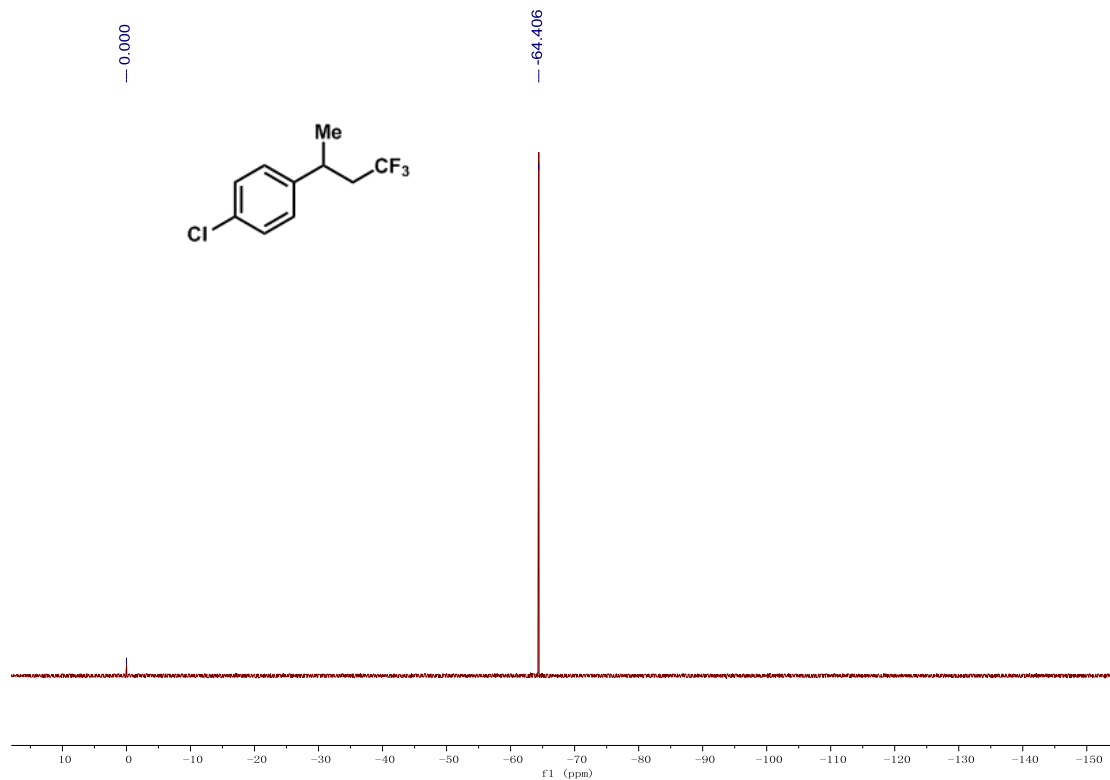

2-44

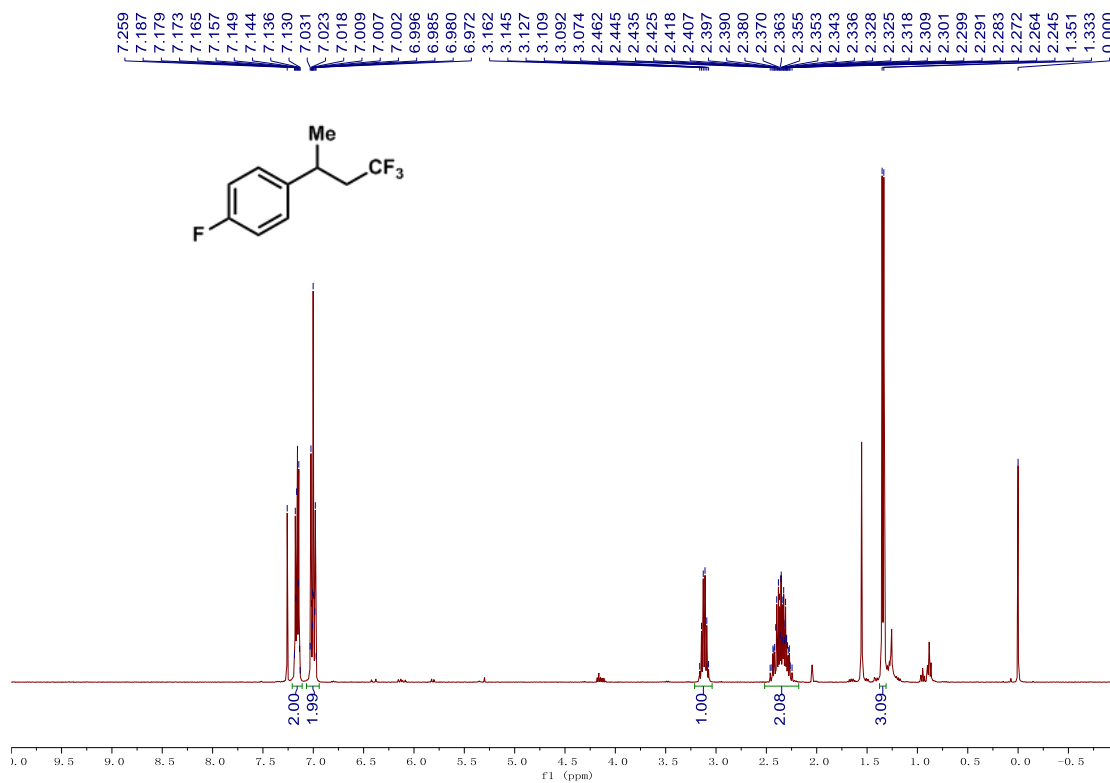

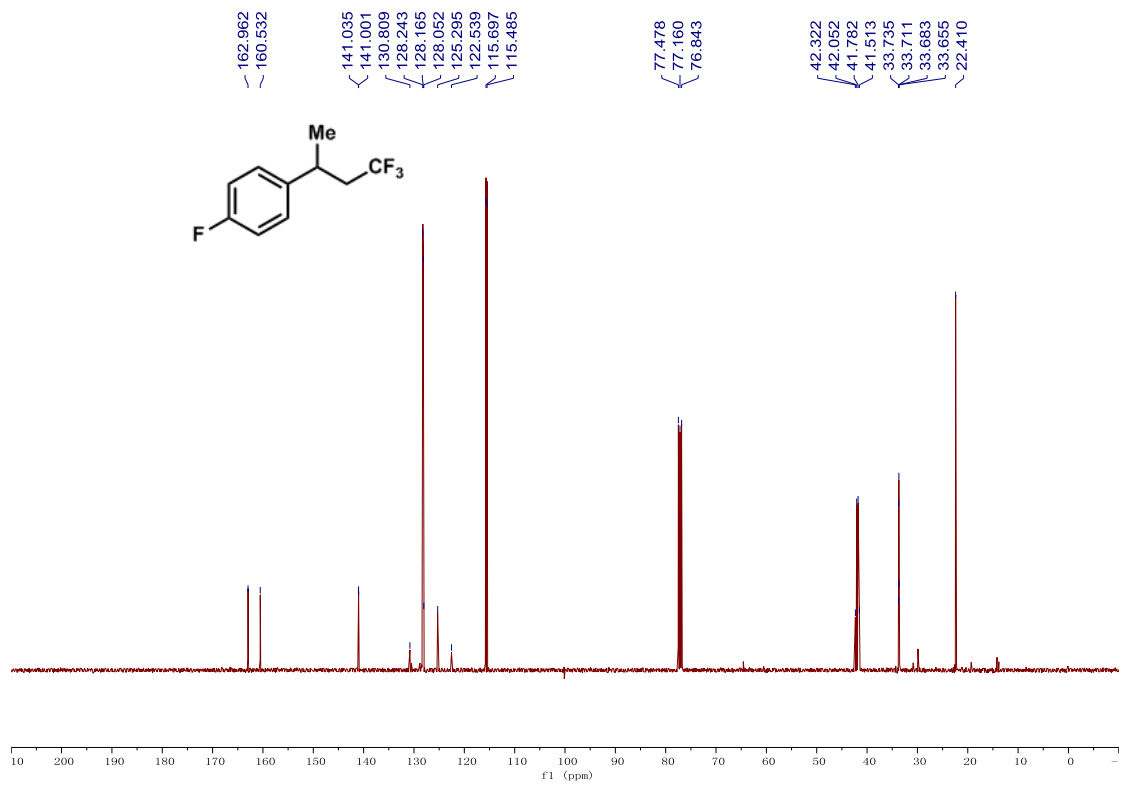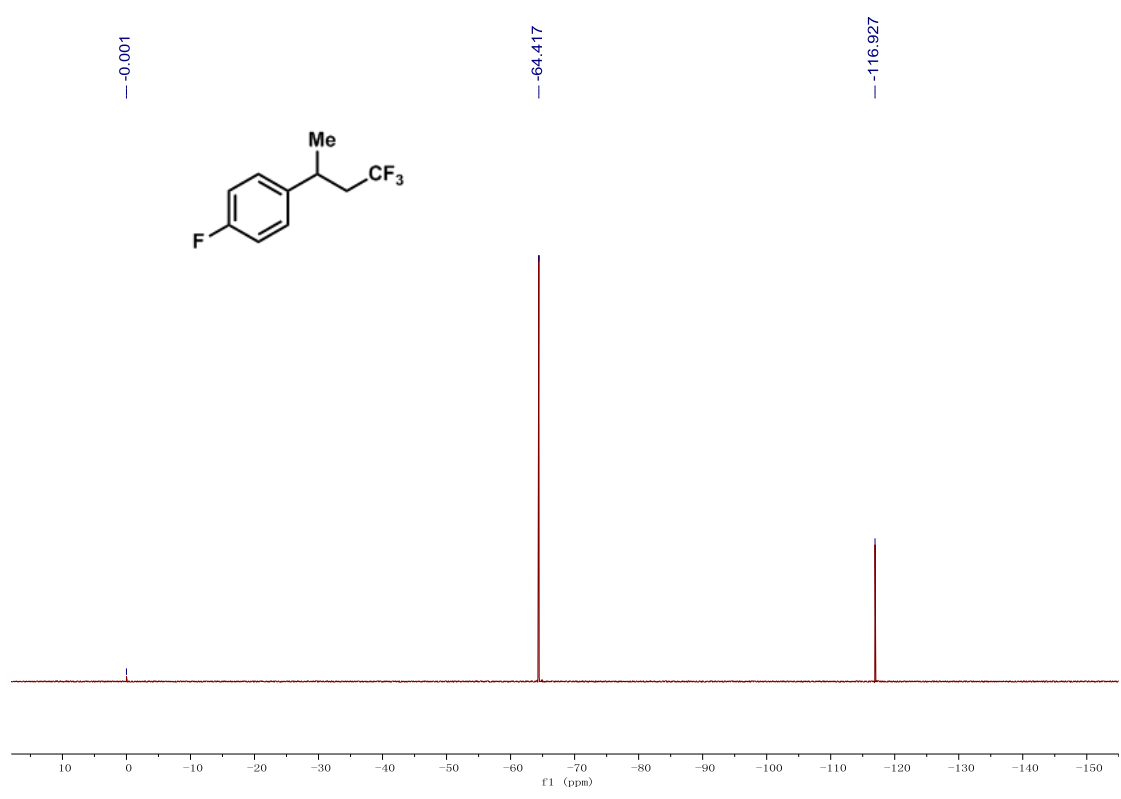

2-45

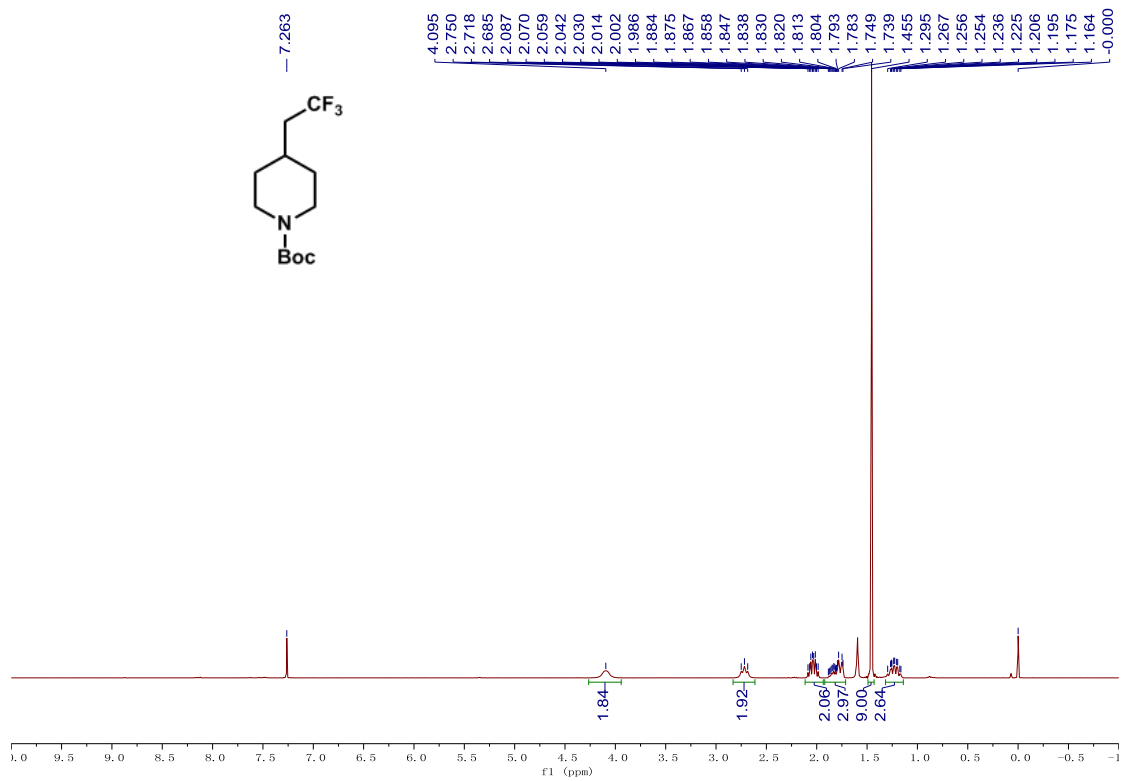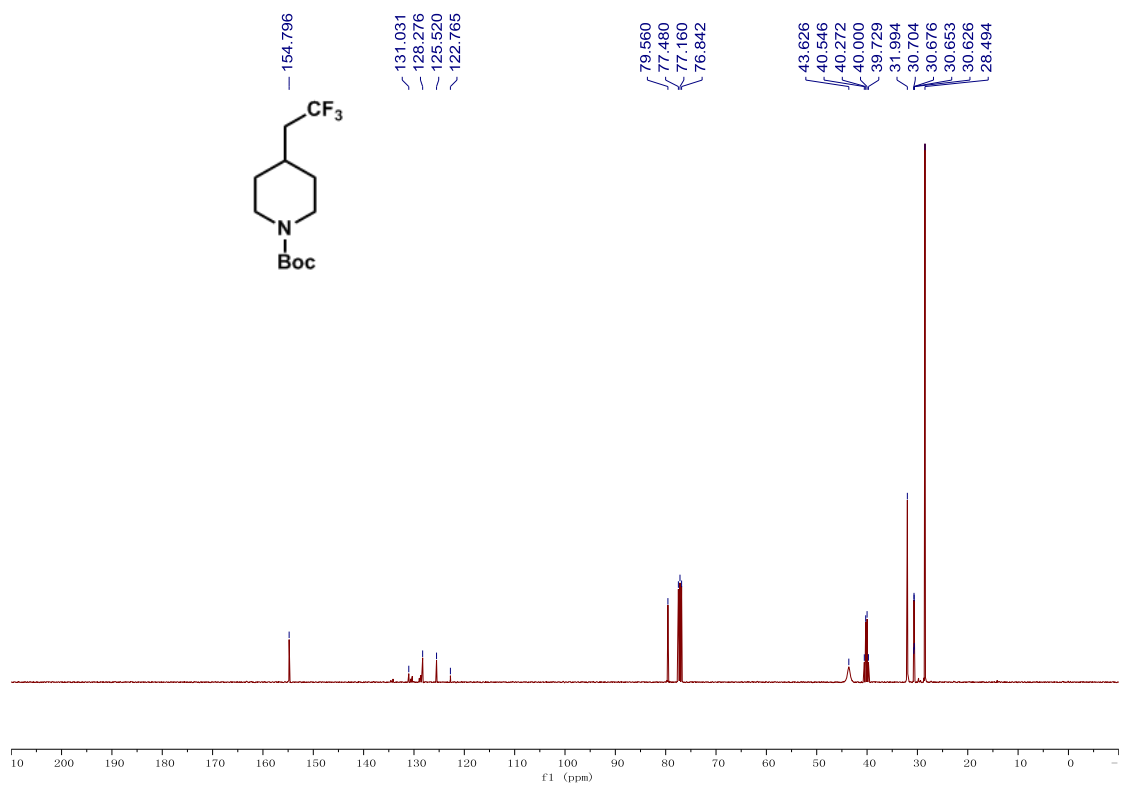

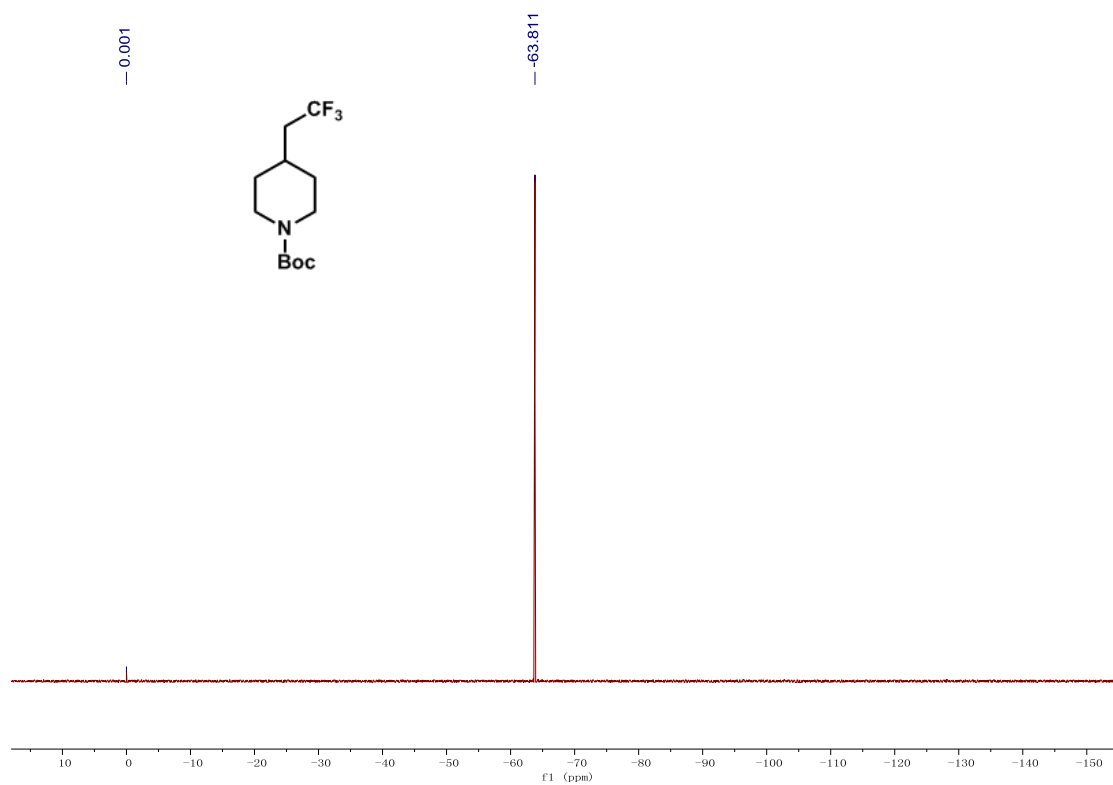

2-46

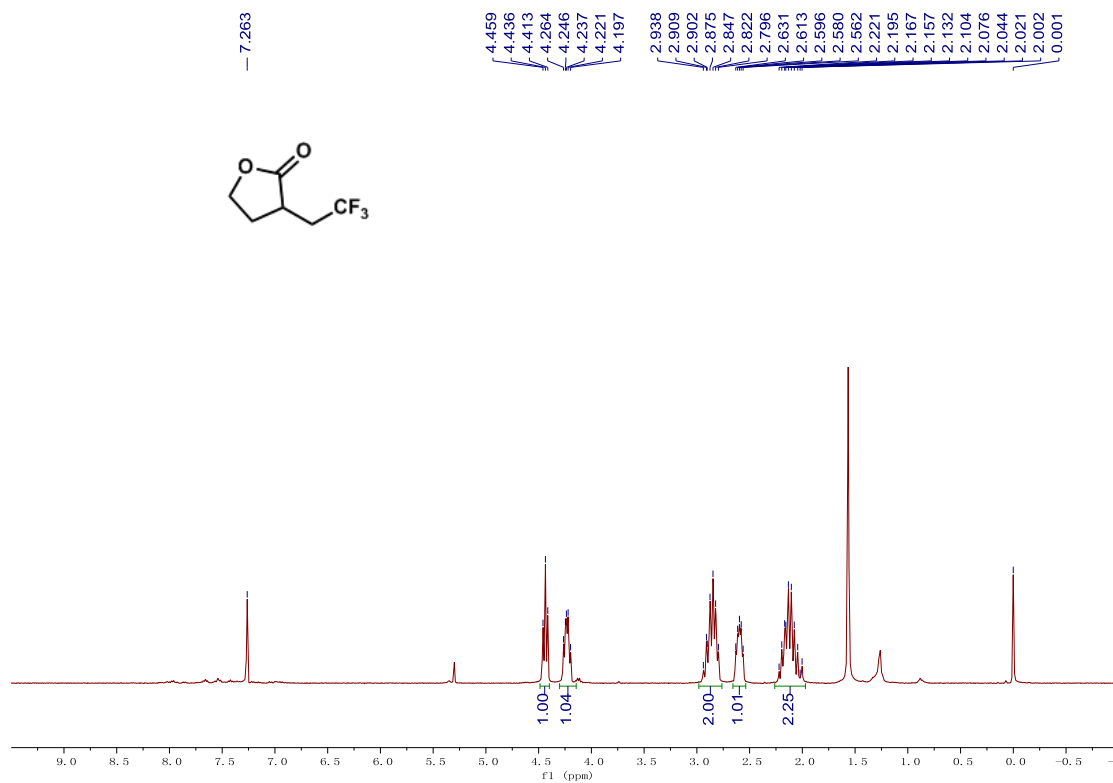

p6-166-1-C/10

— 176.792

130.503  
127.756  
125.010  
122.266

77.480  
77.160  
76.844  
— 66.802

35.349  
35.052  
34.757  
34.654  
34.626  
34.597  
34.570  
34.459  
29.349

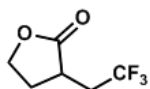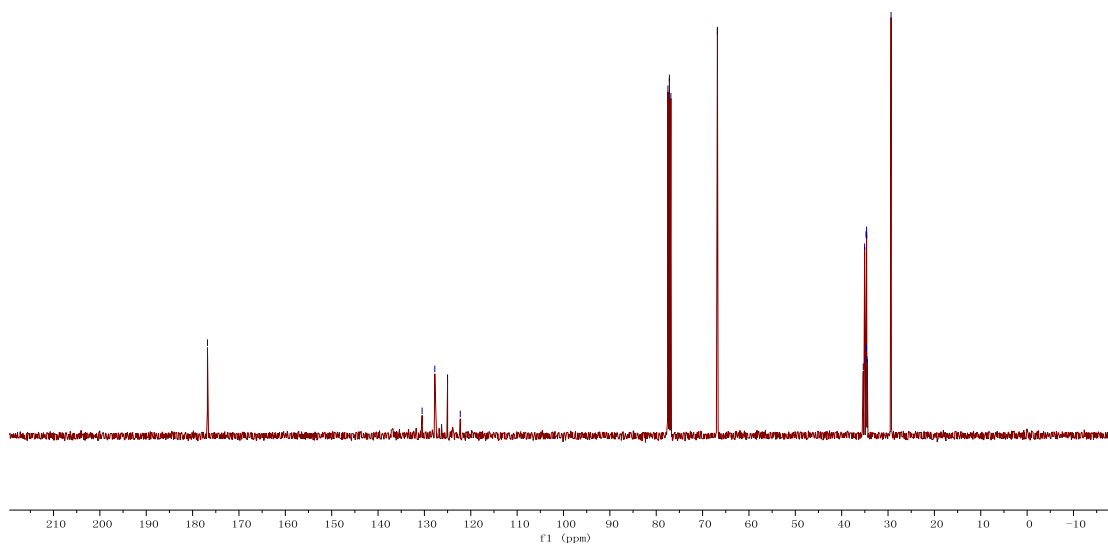

— -0.000

— -65.955

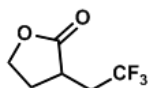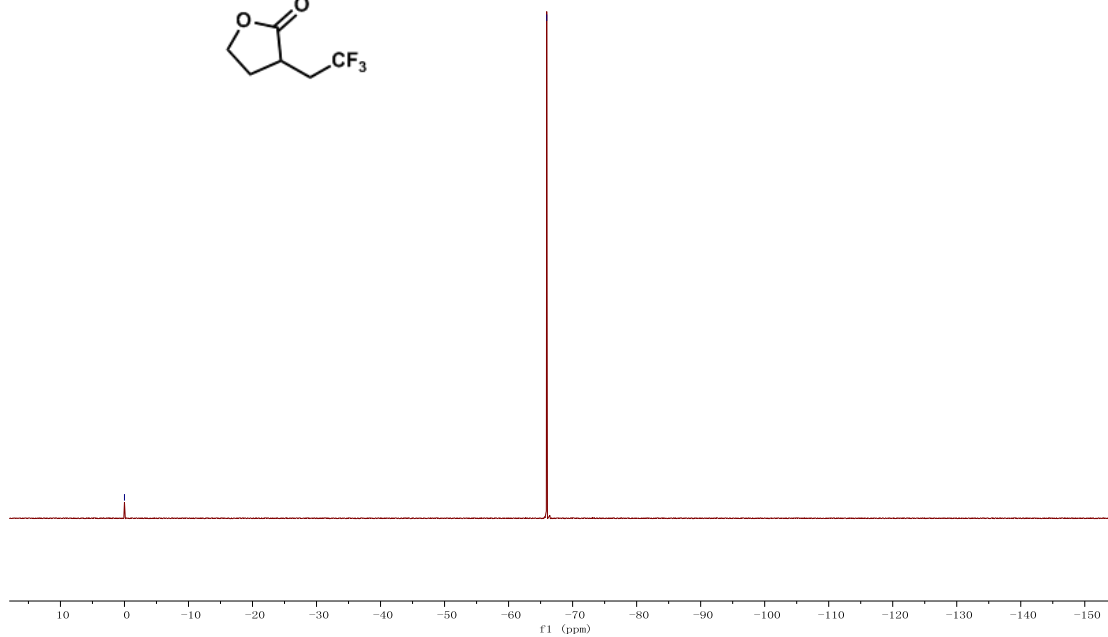

2-47

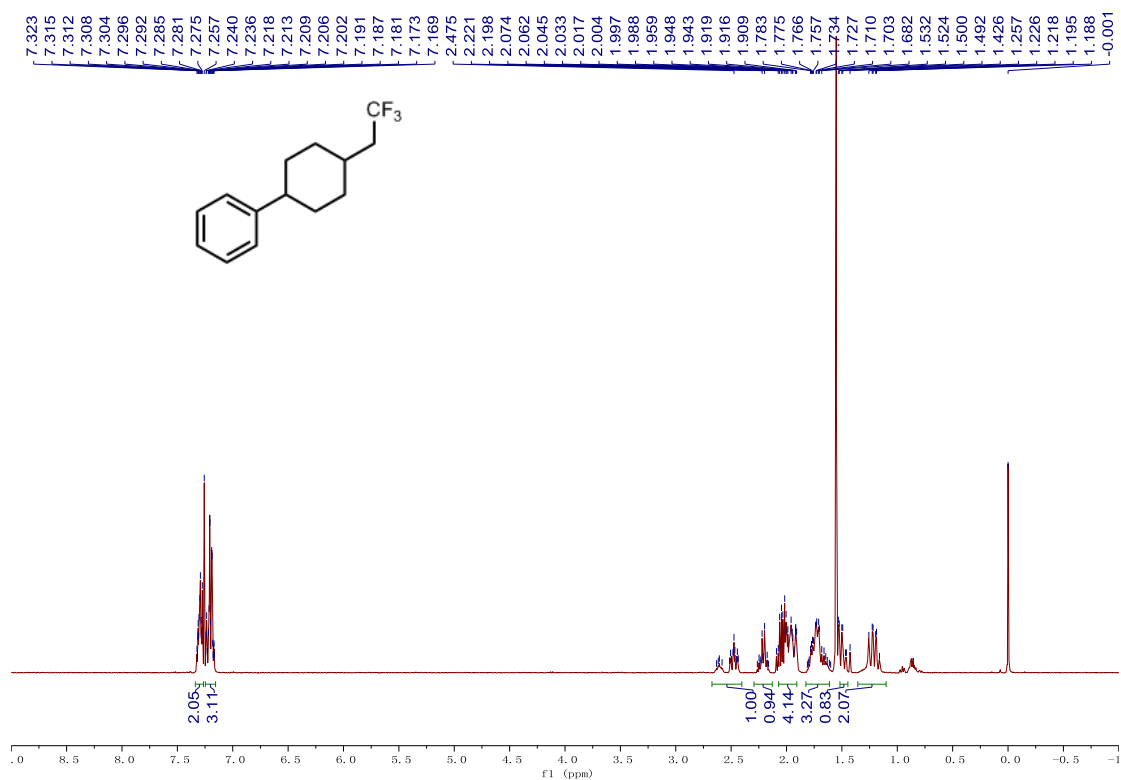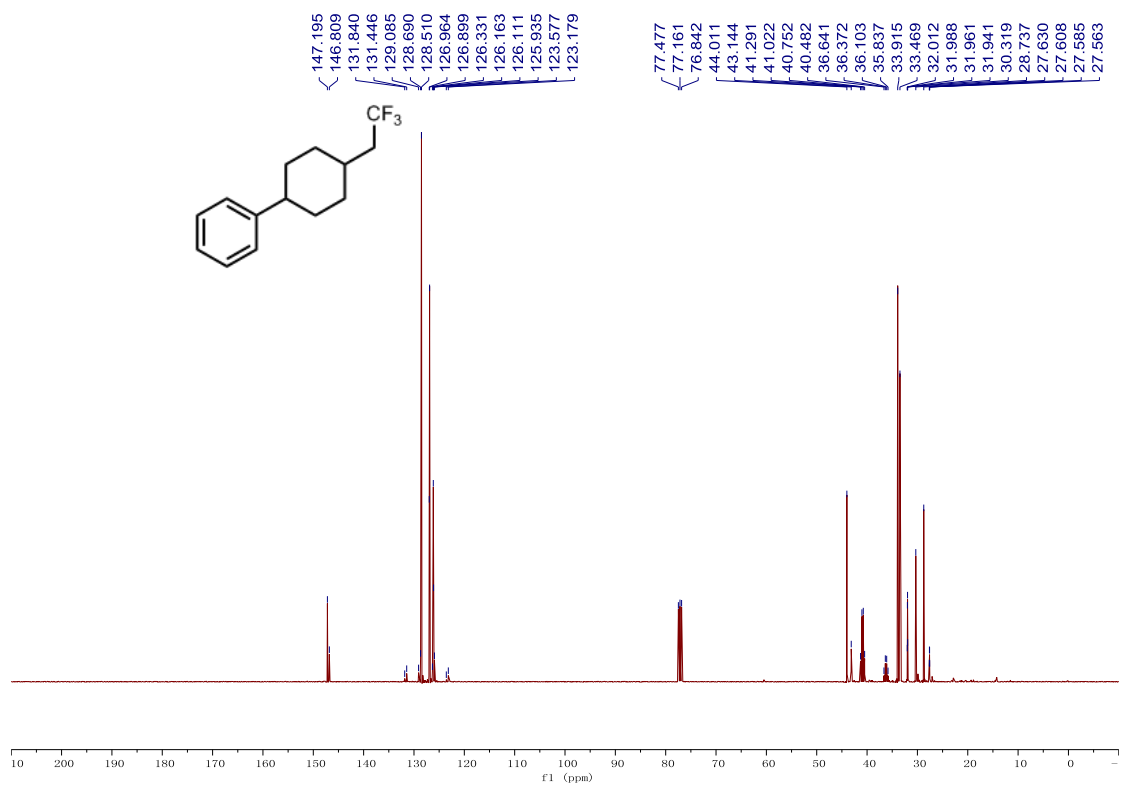

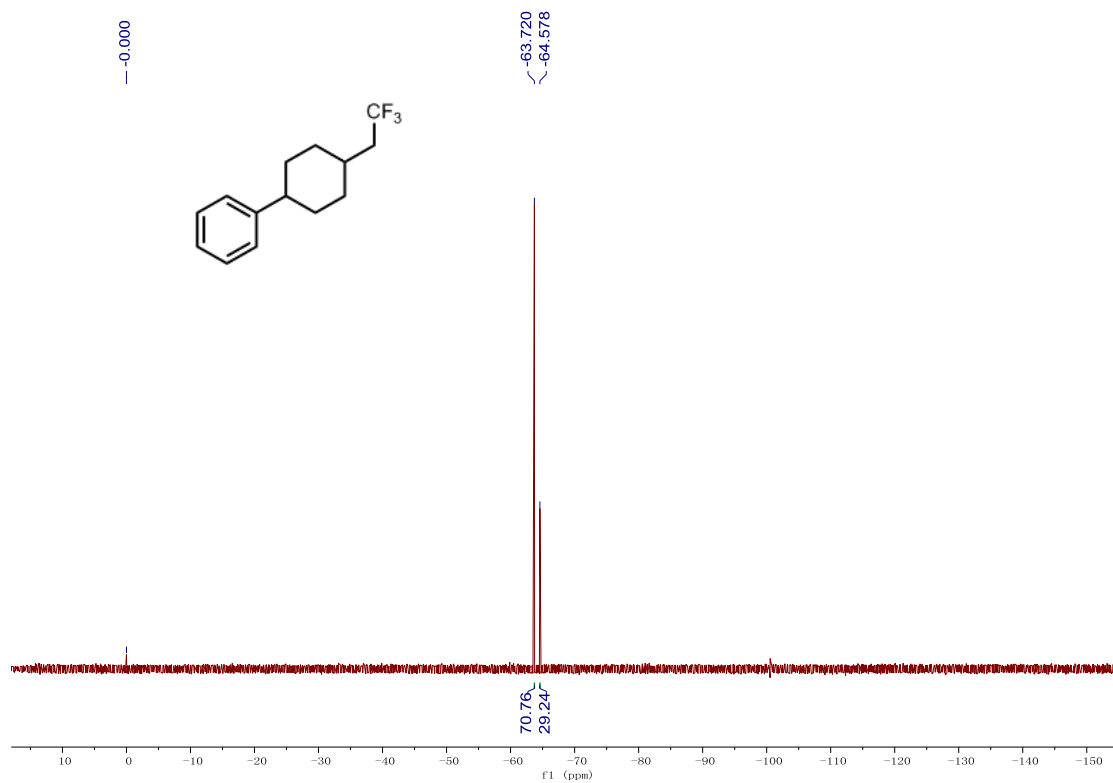

2-48

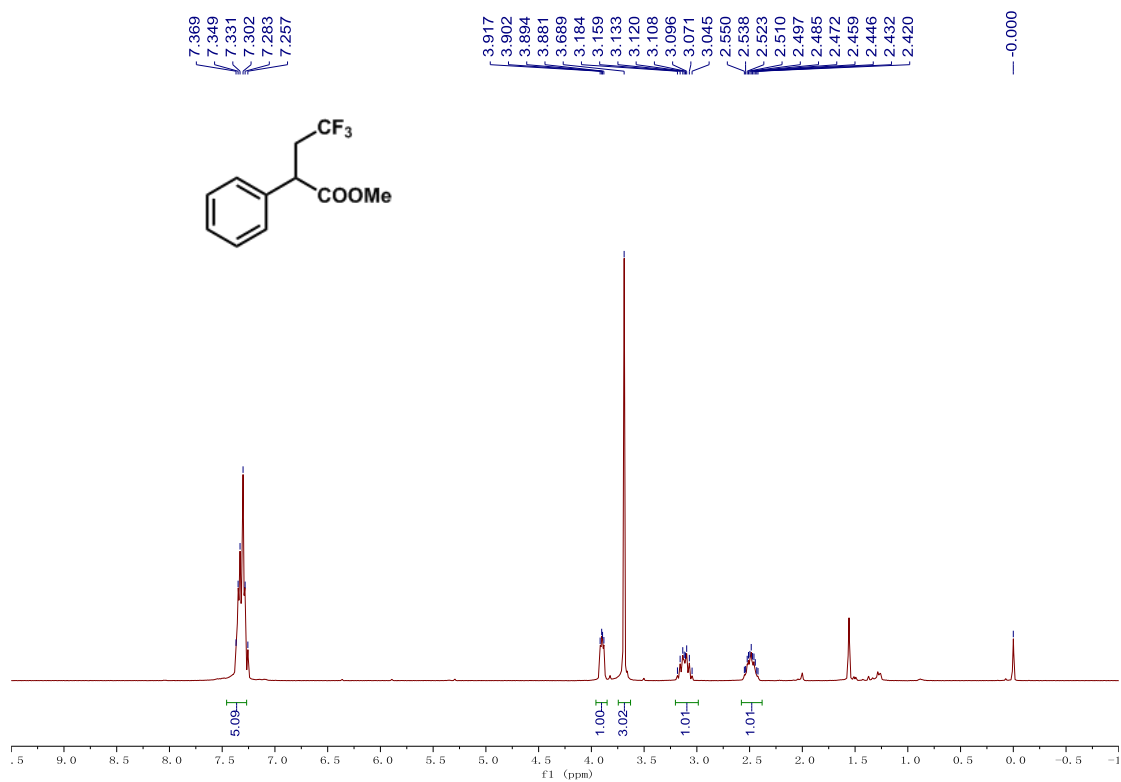

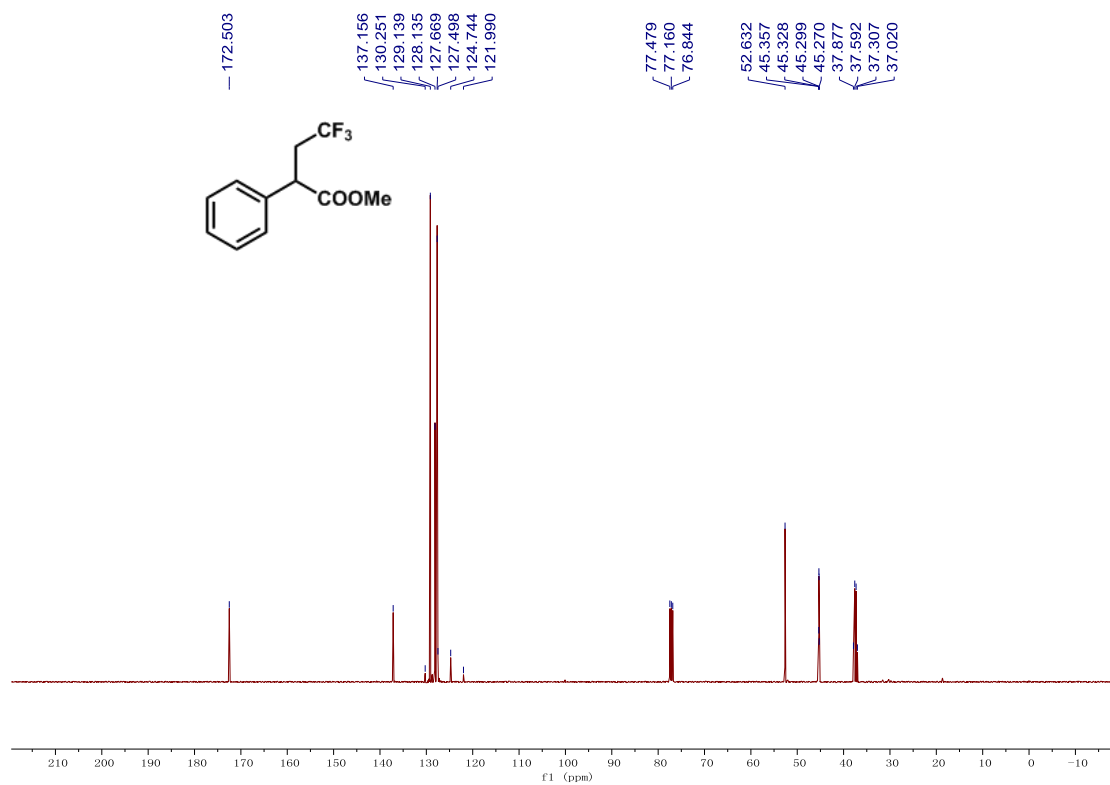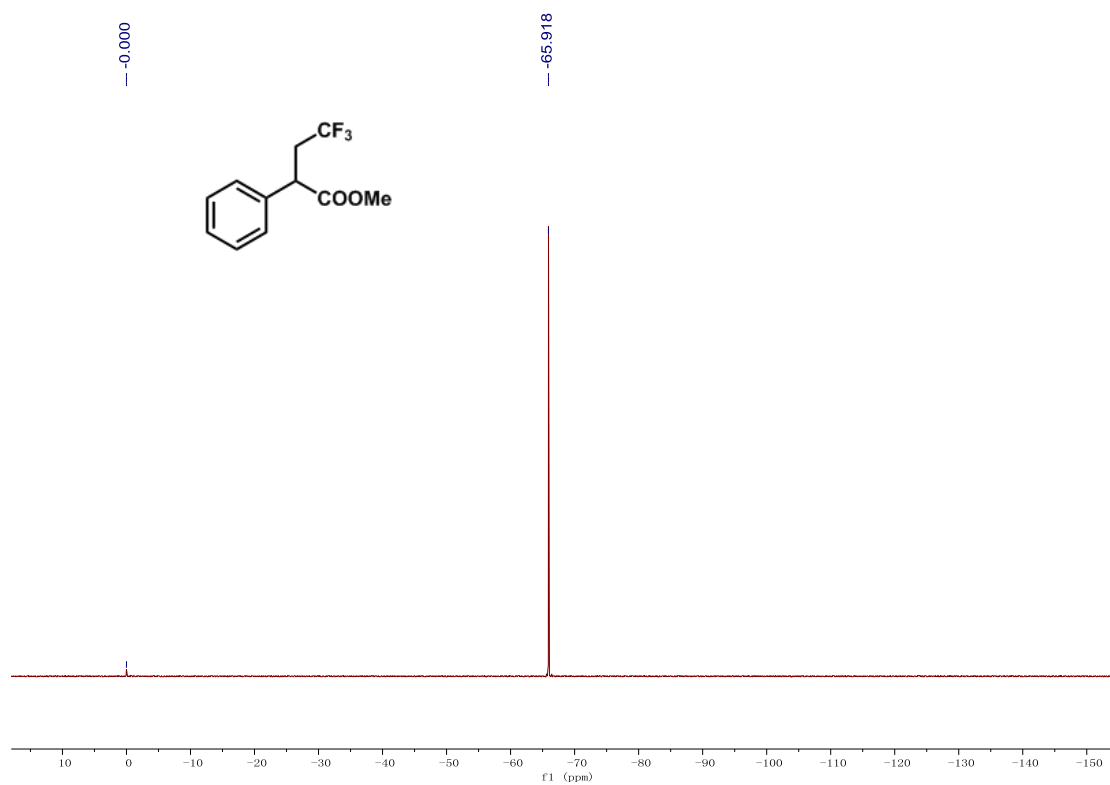



2-49

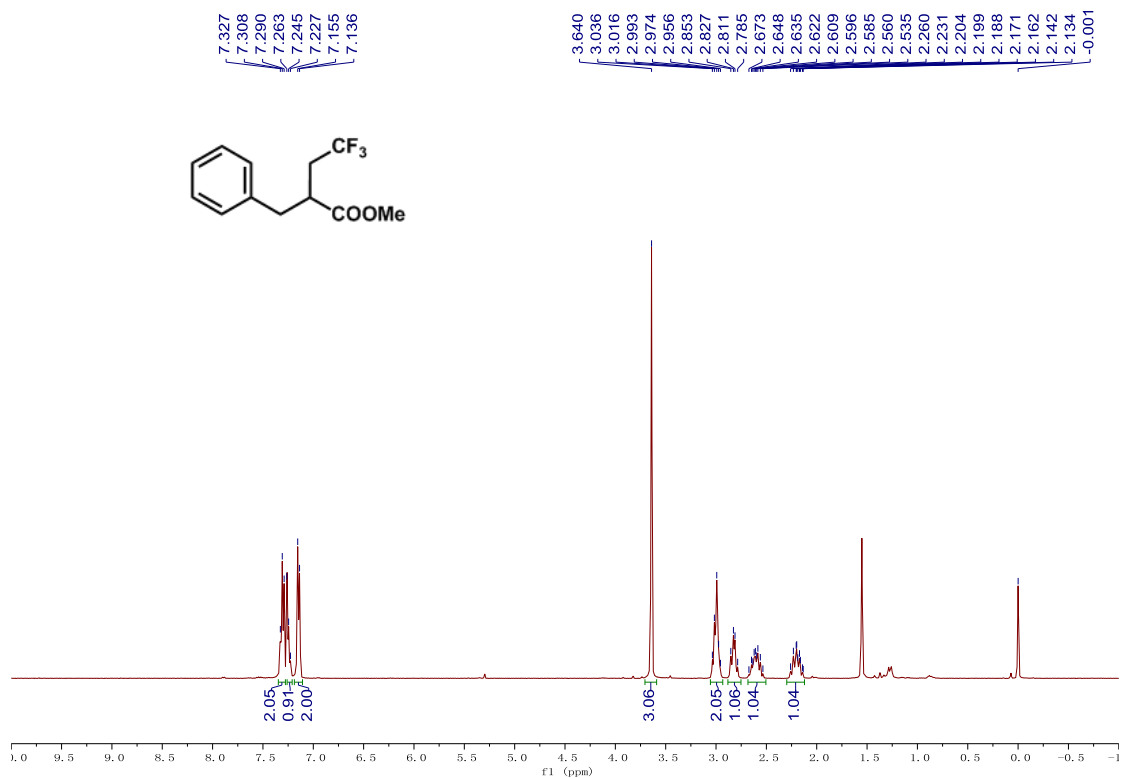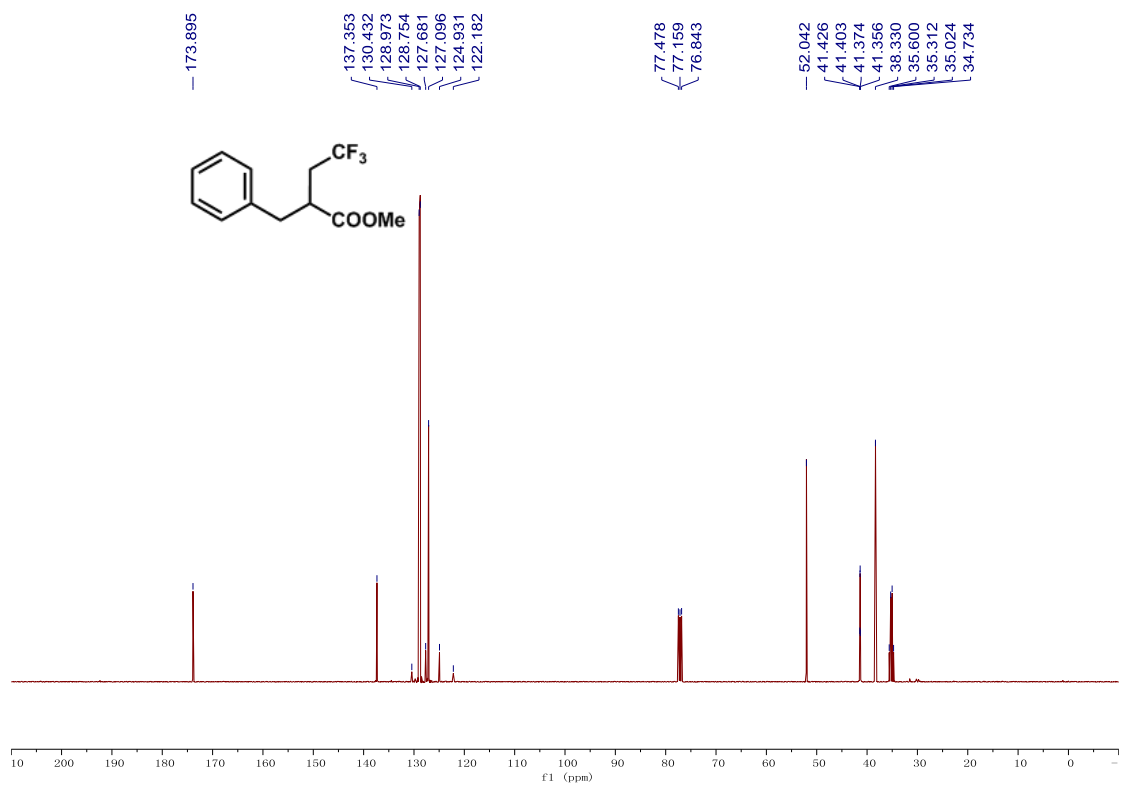

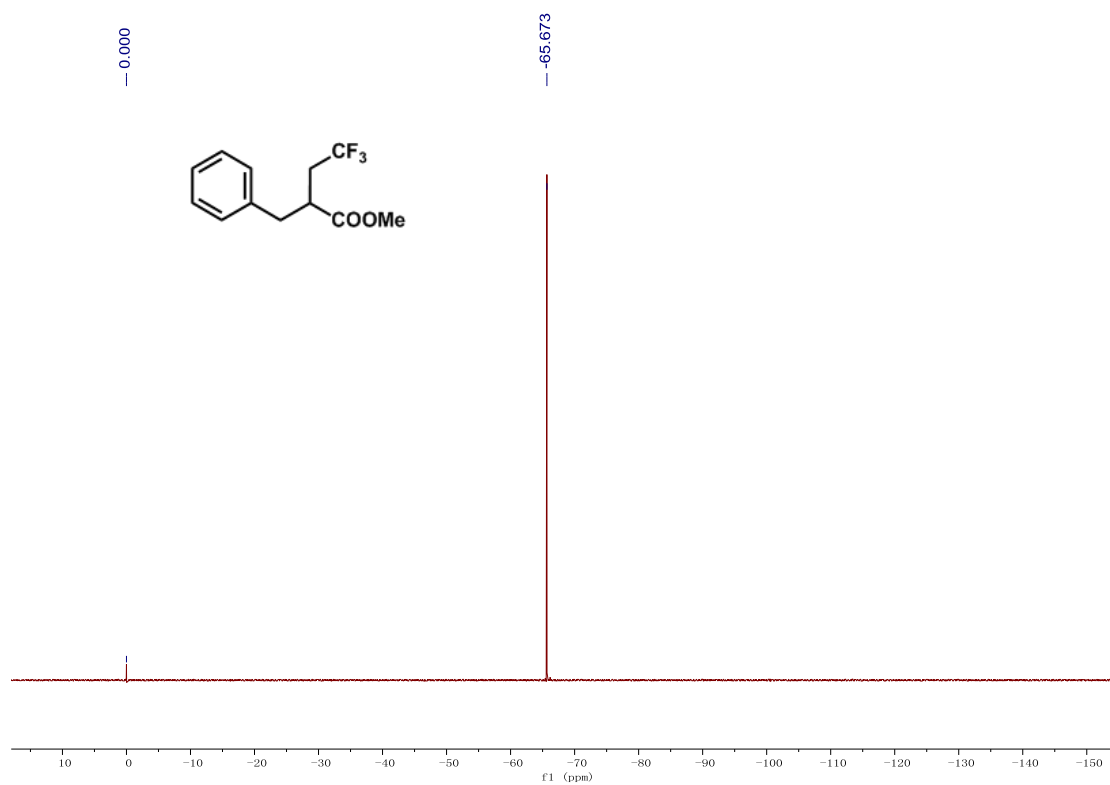

## 2-50

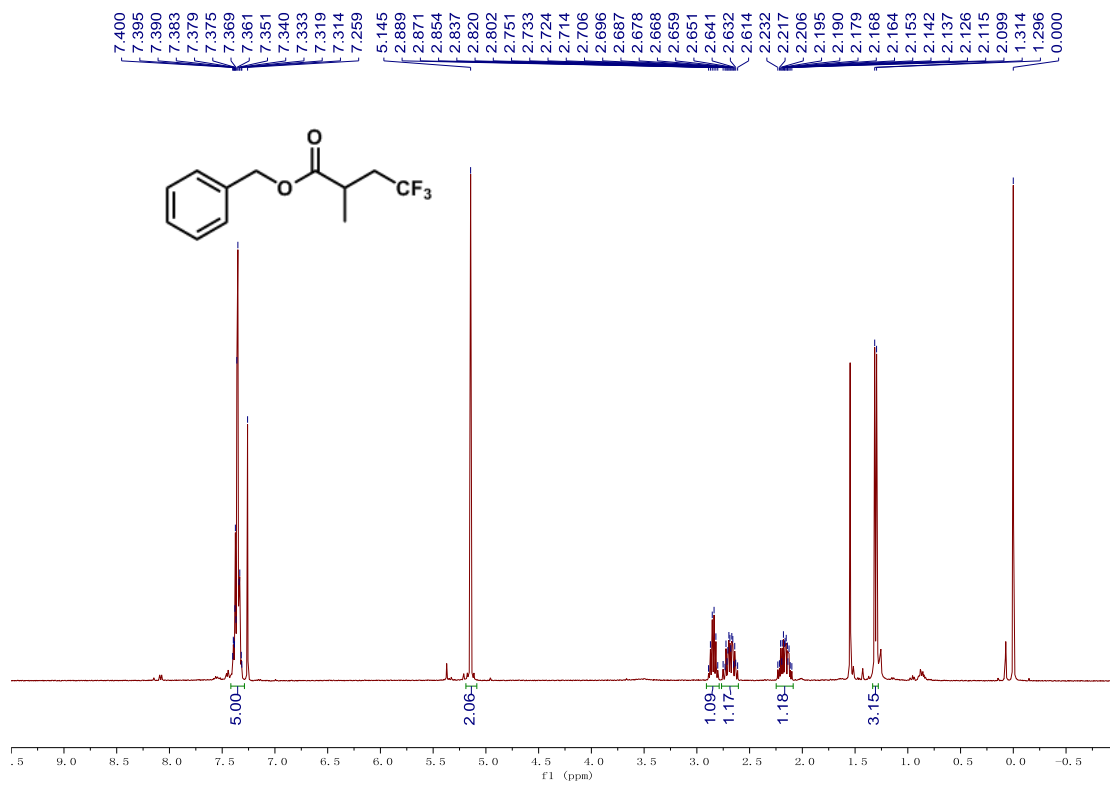

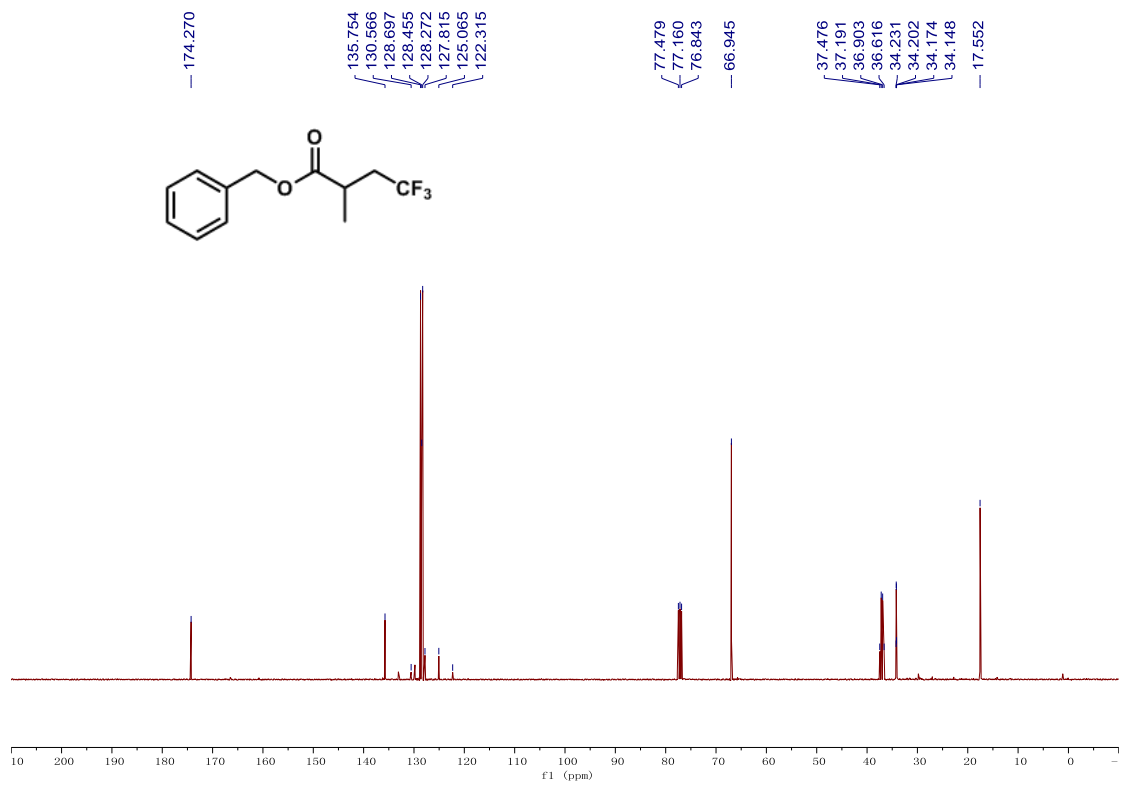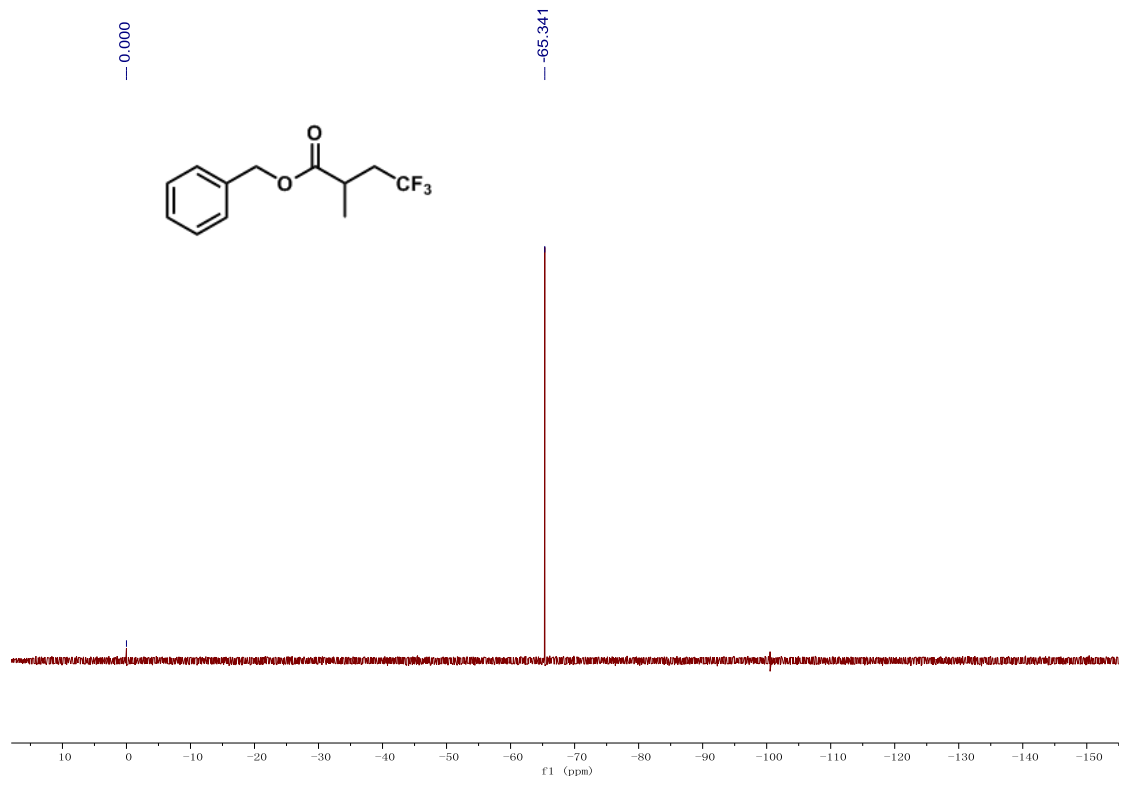

2-51

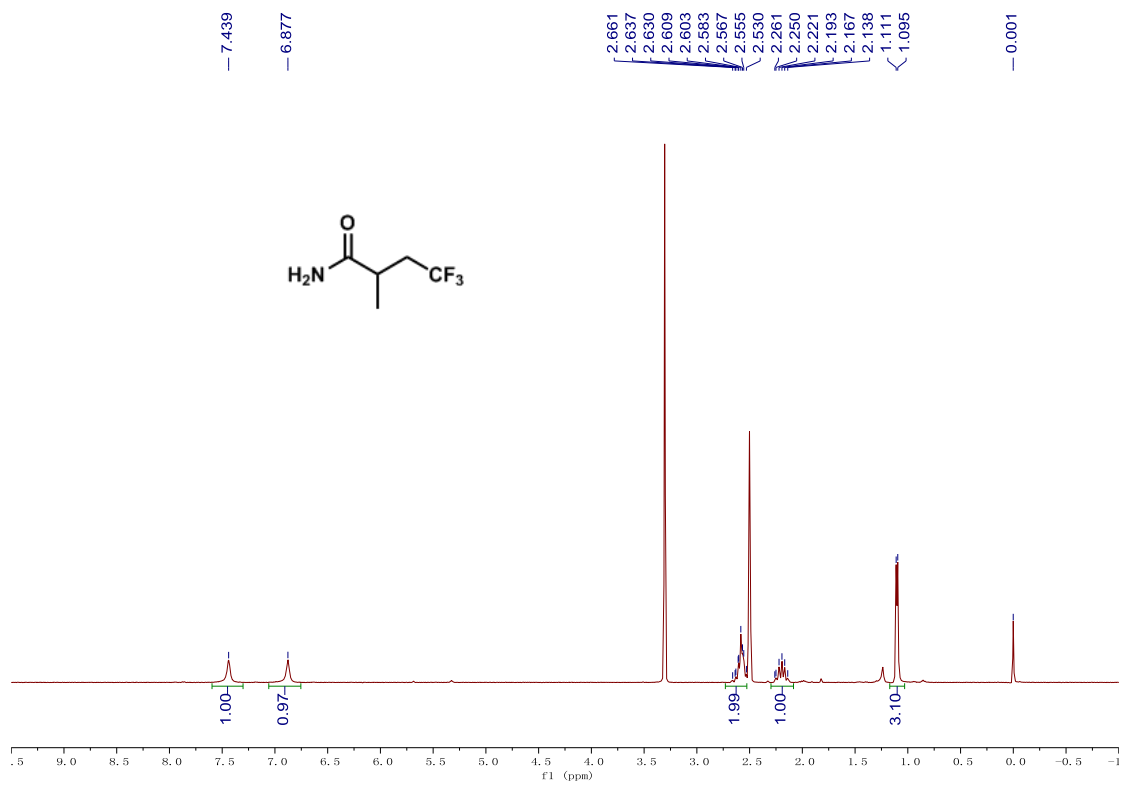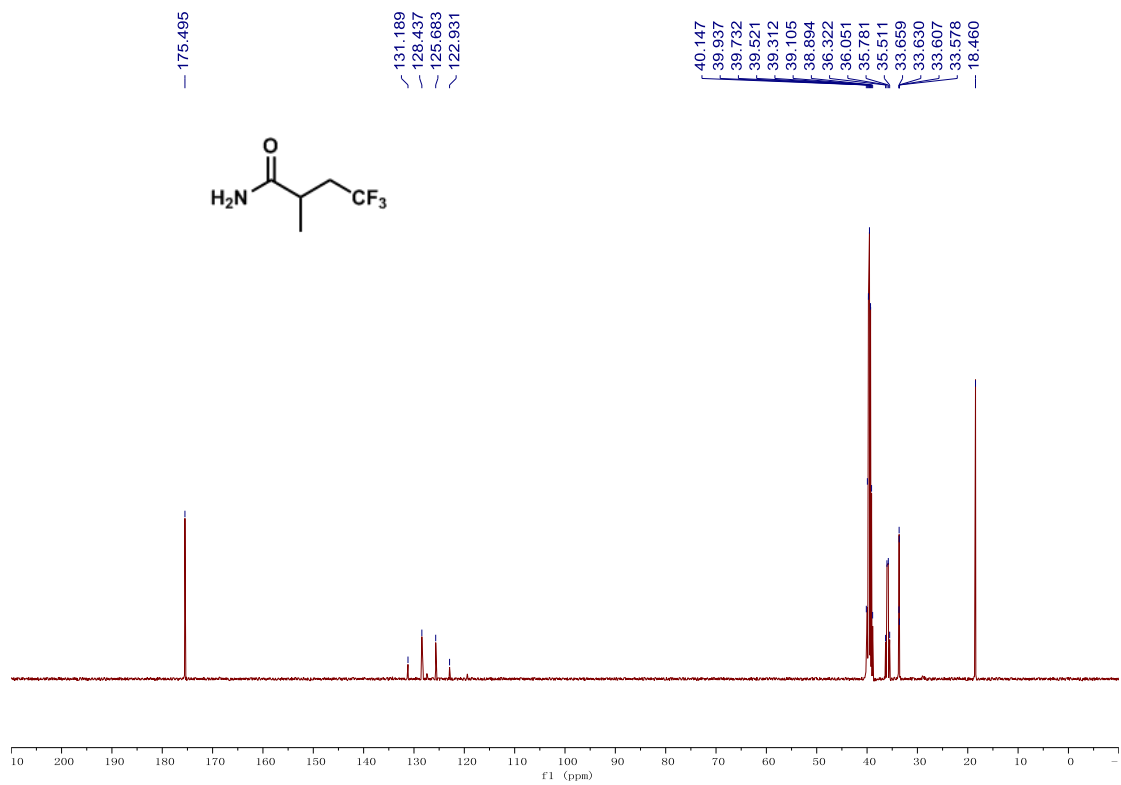

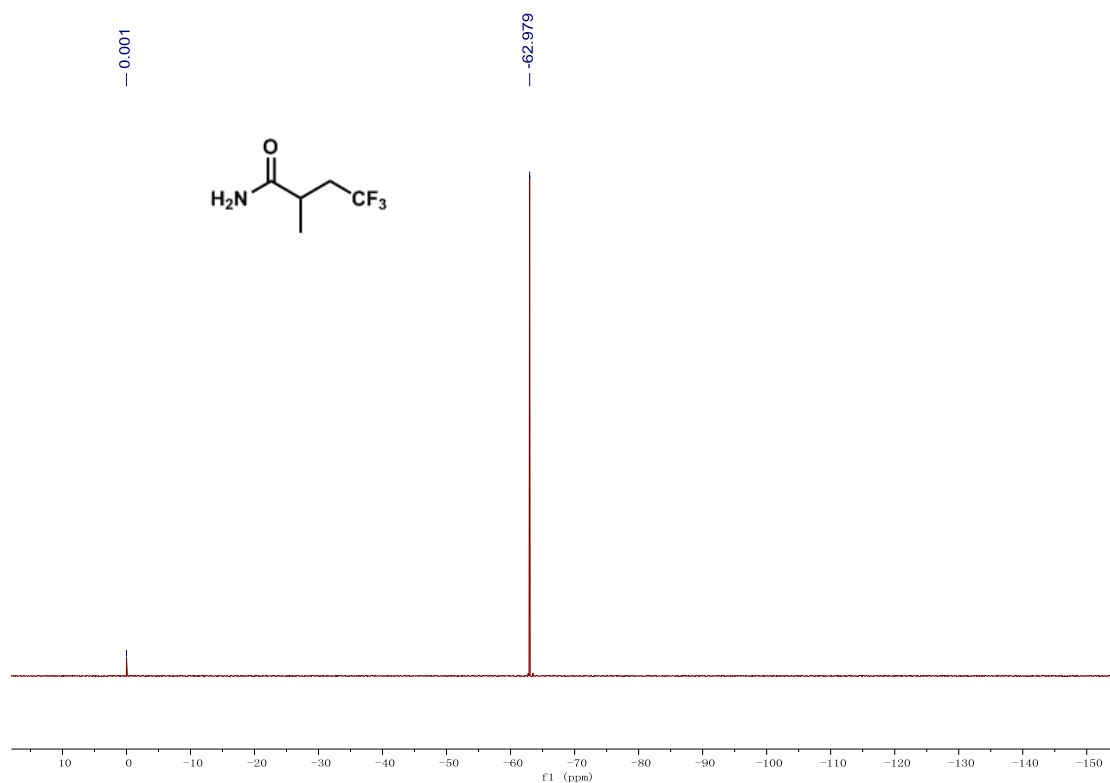

2-52

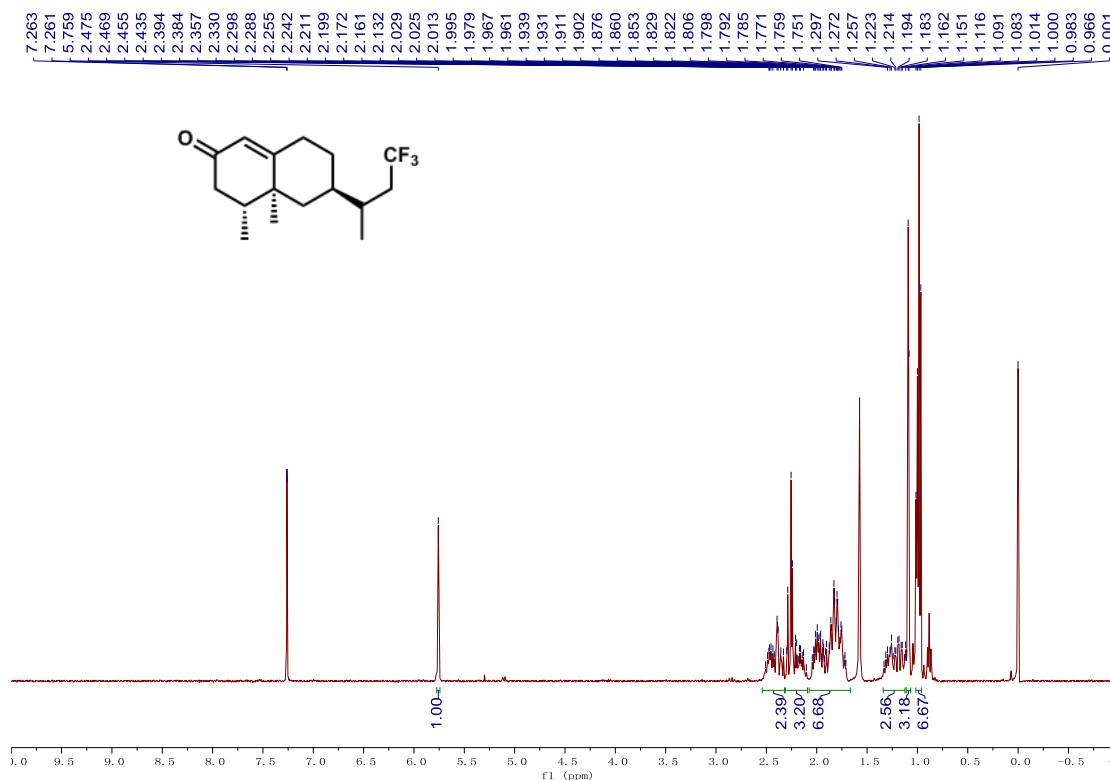

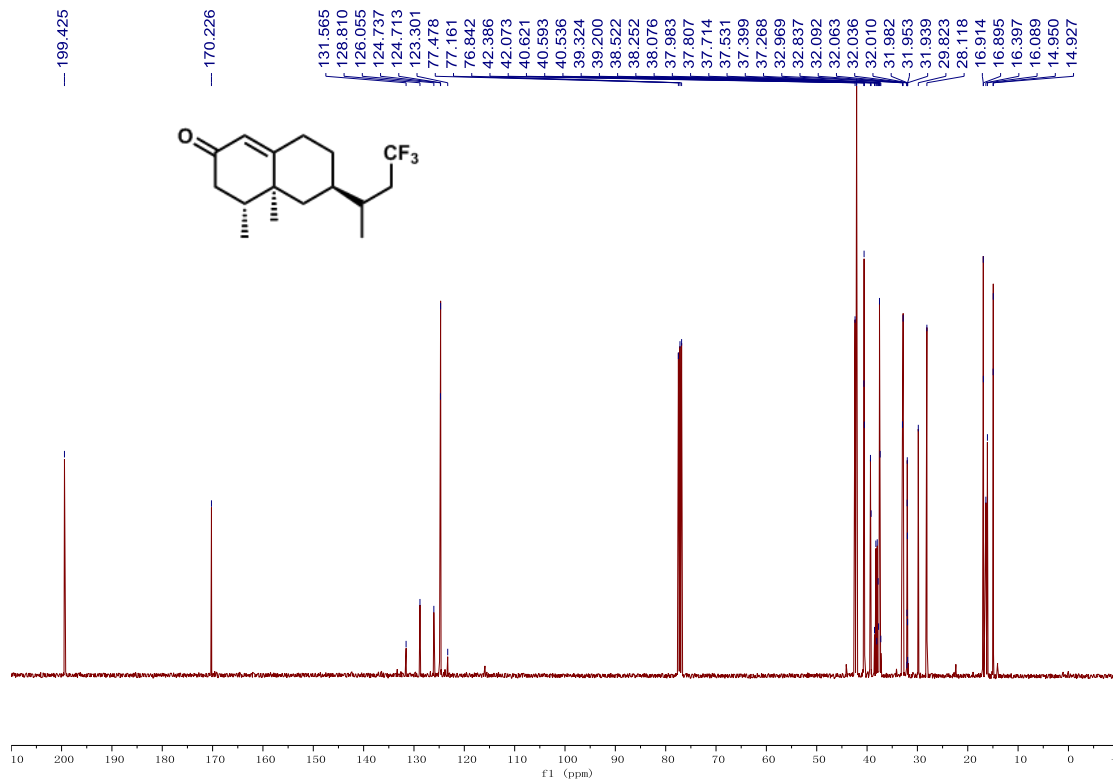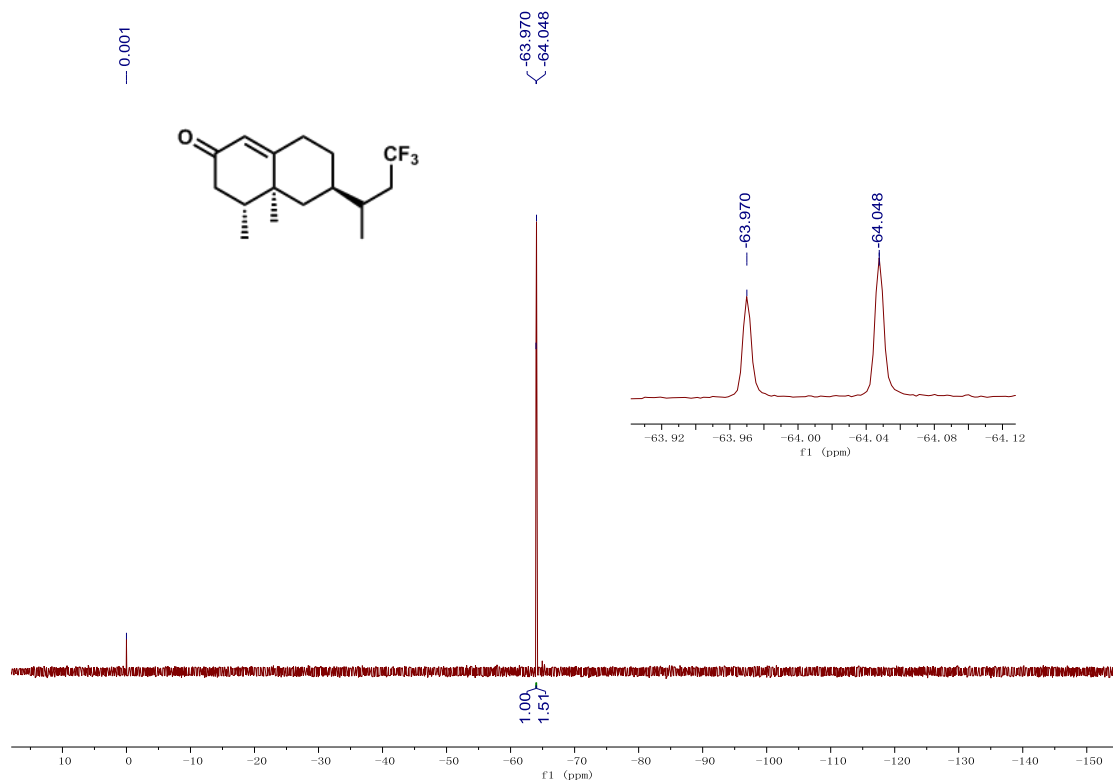

2-53

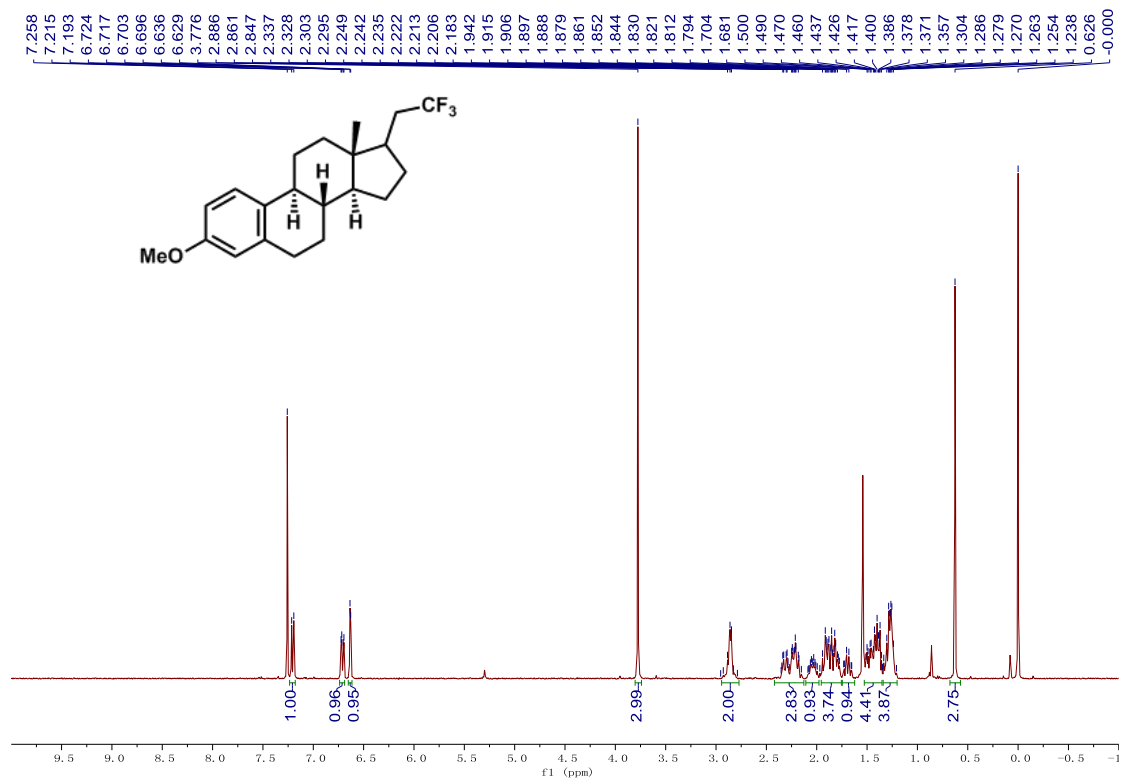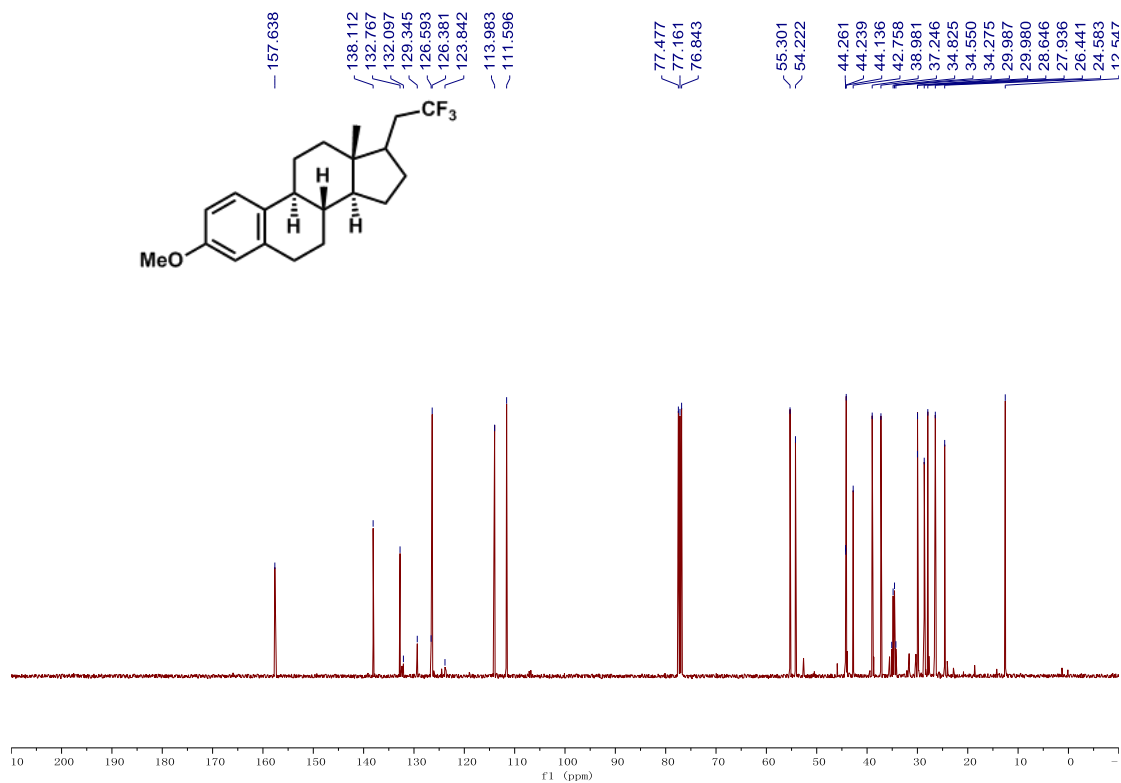

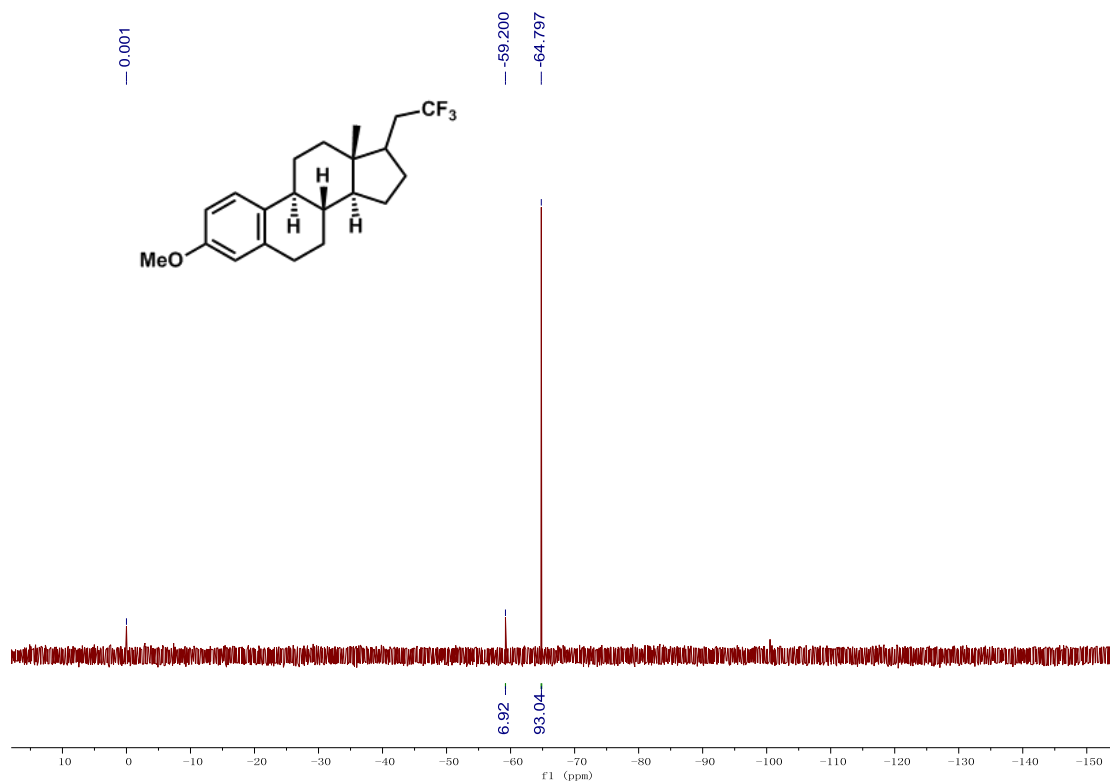

## 2-54

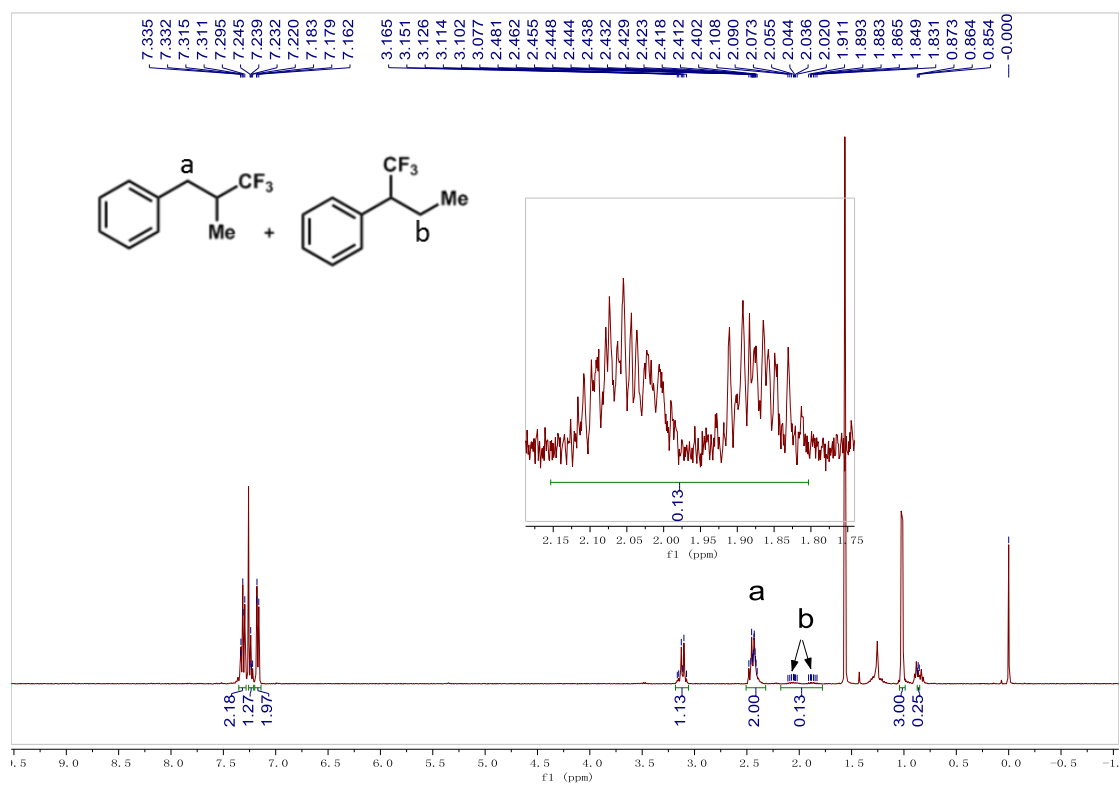



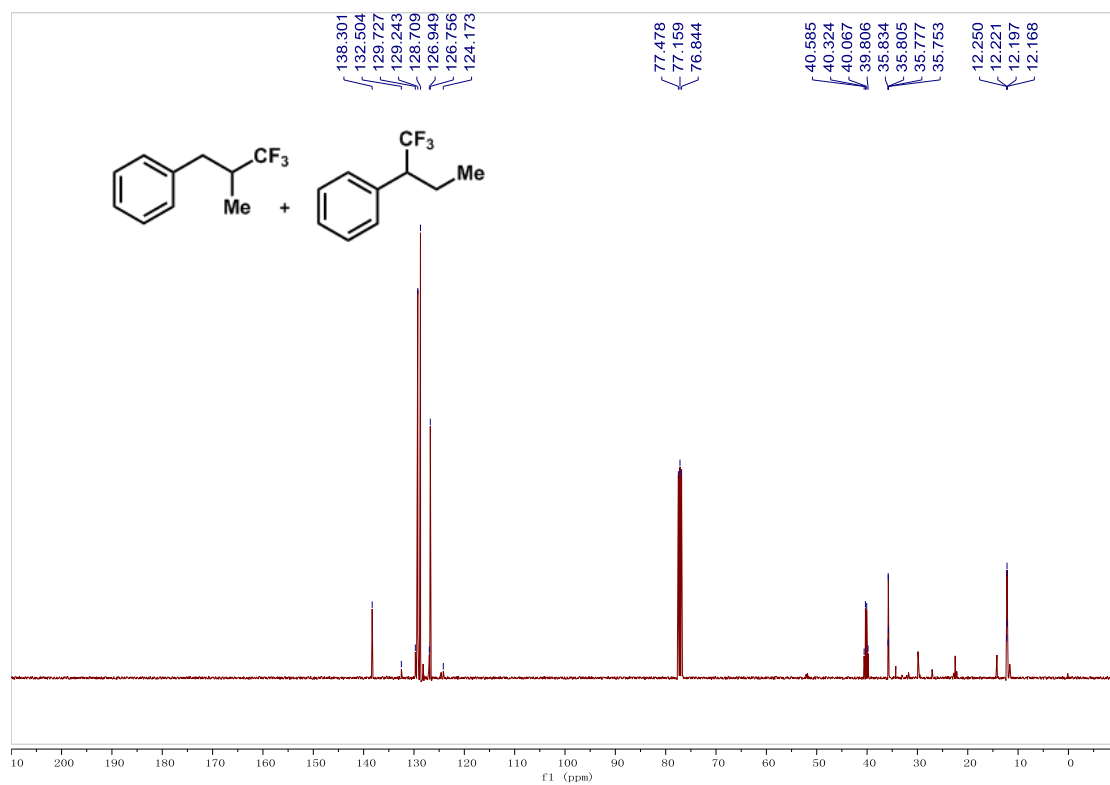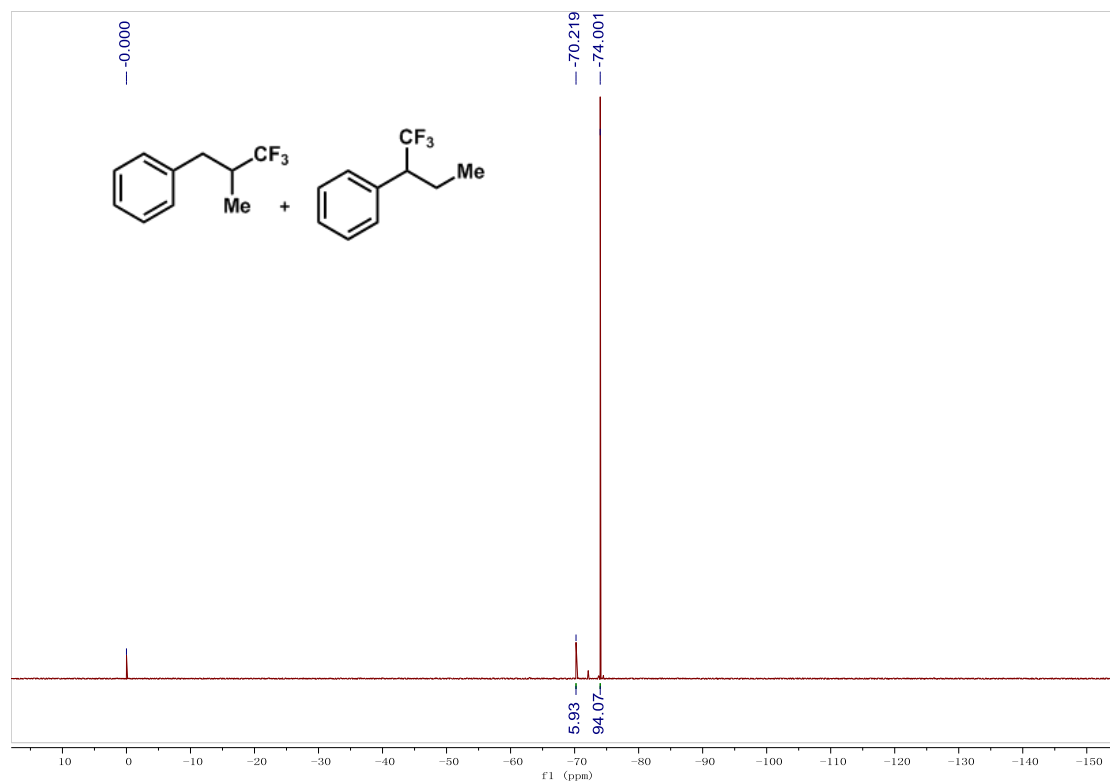

2-55

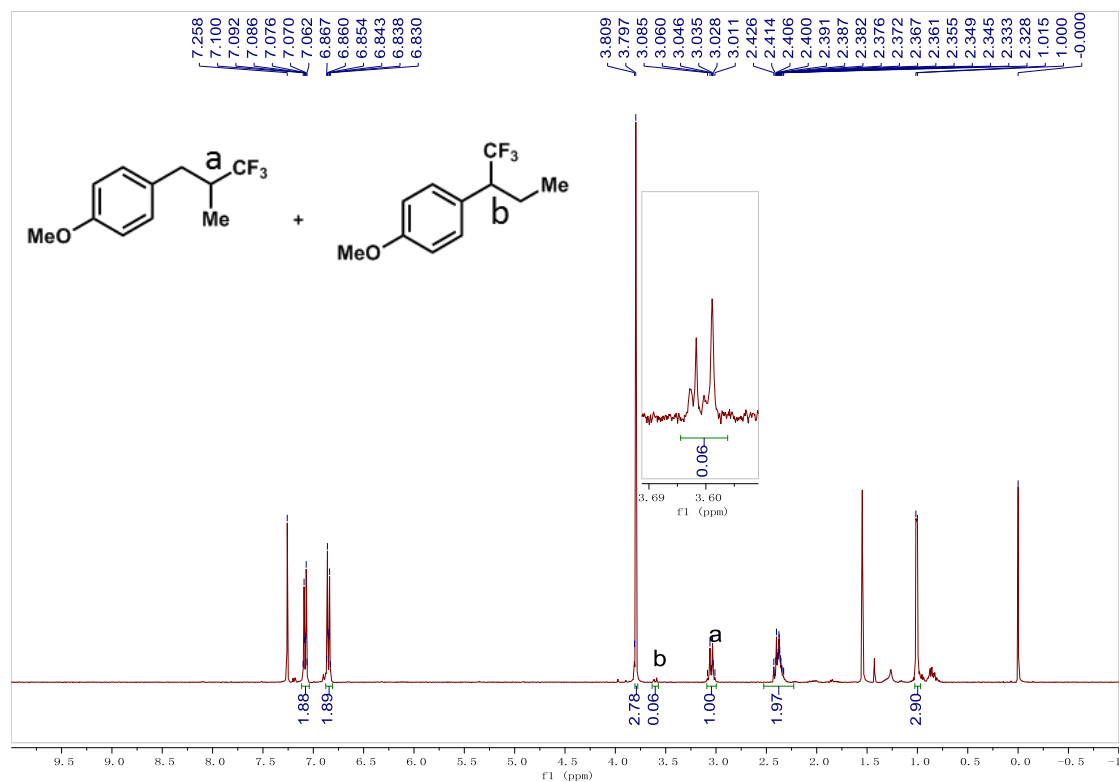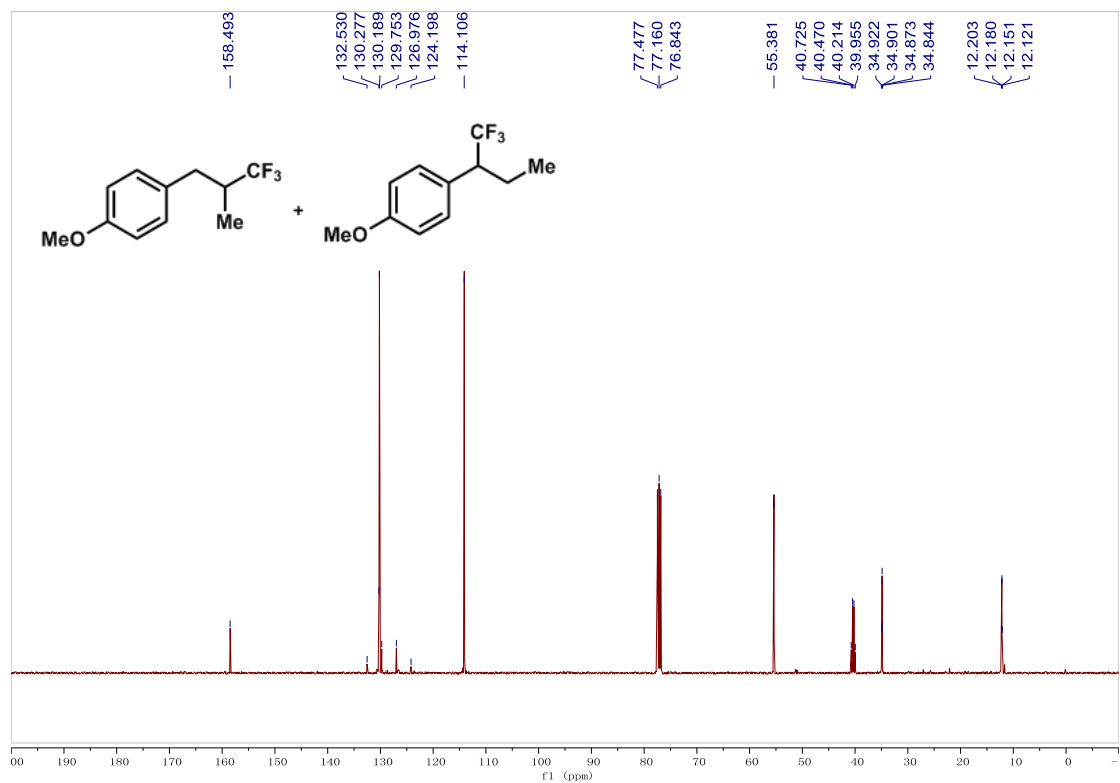

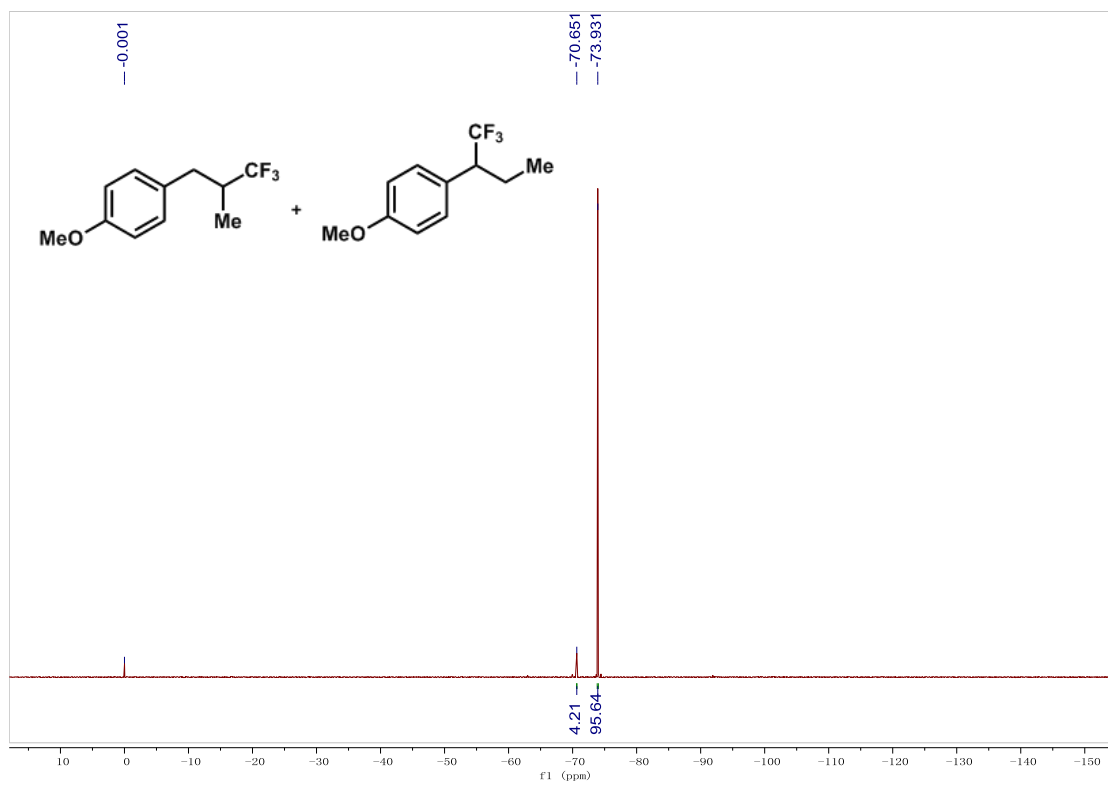

2-56

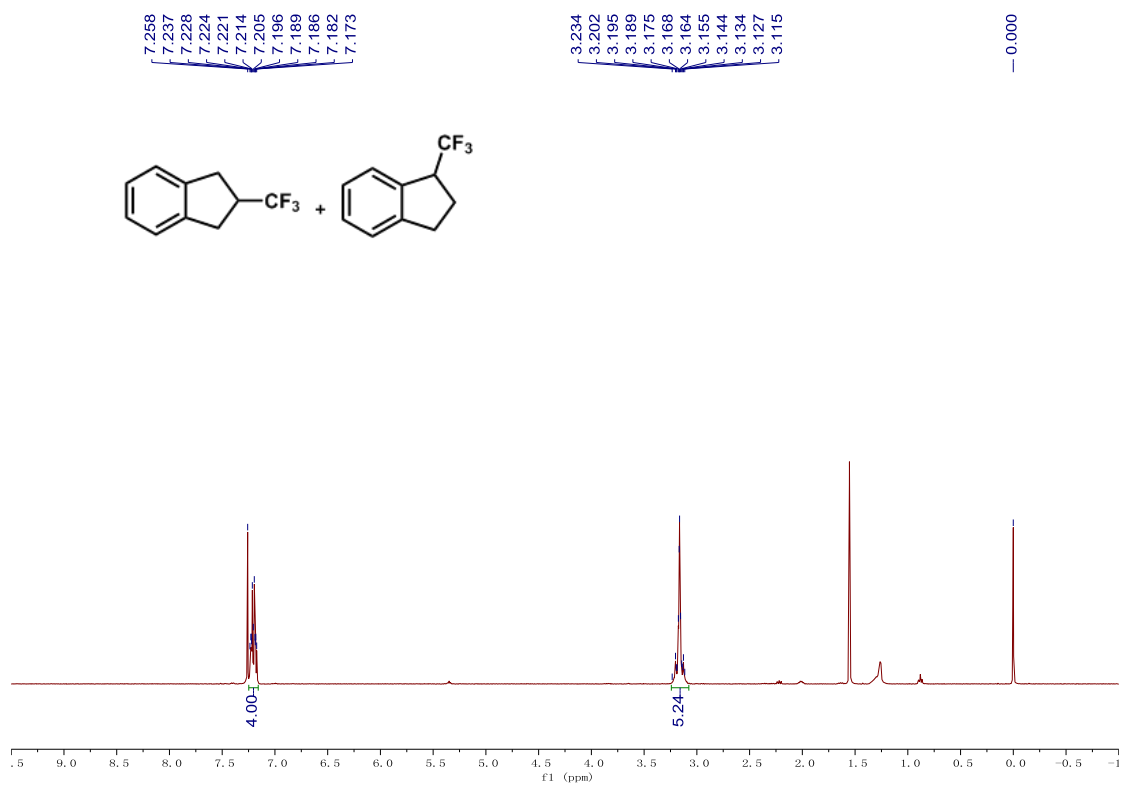

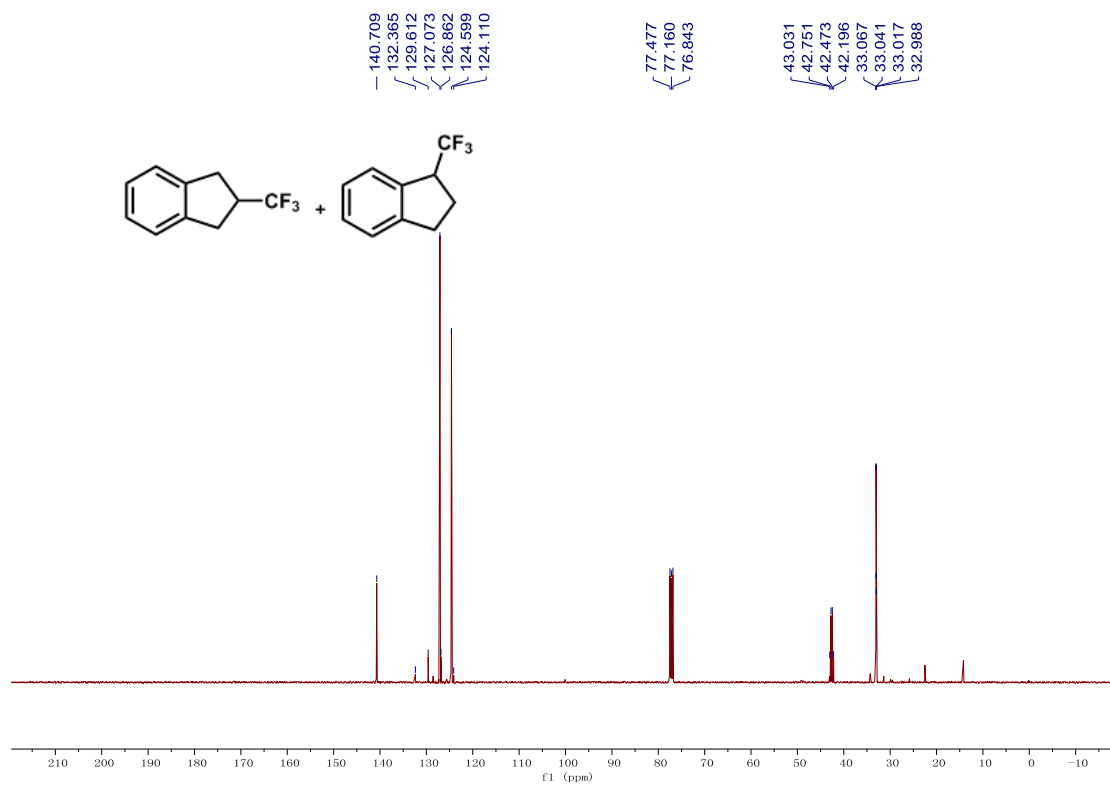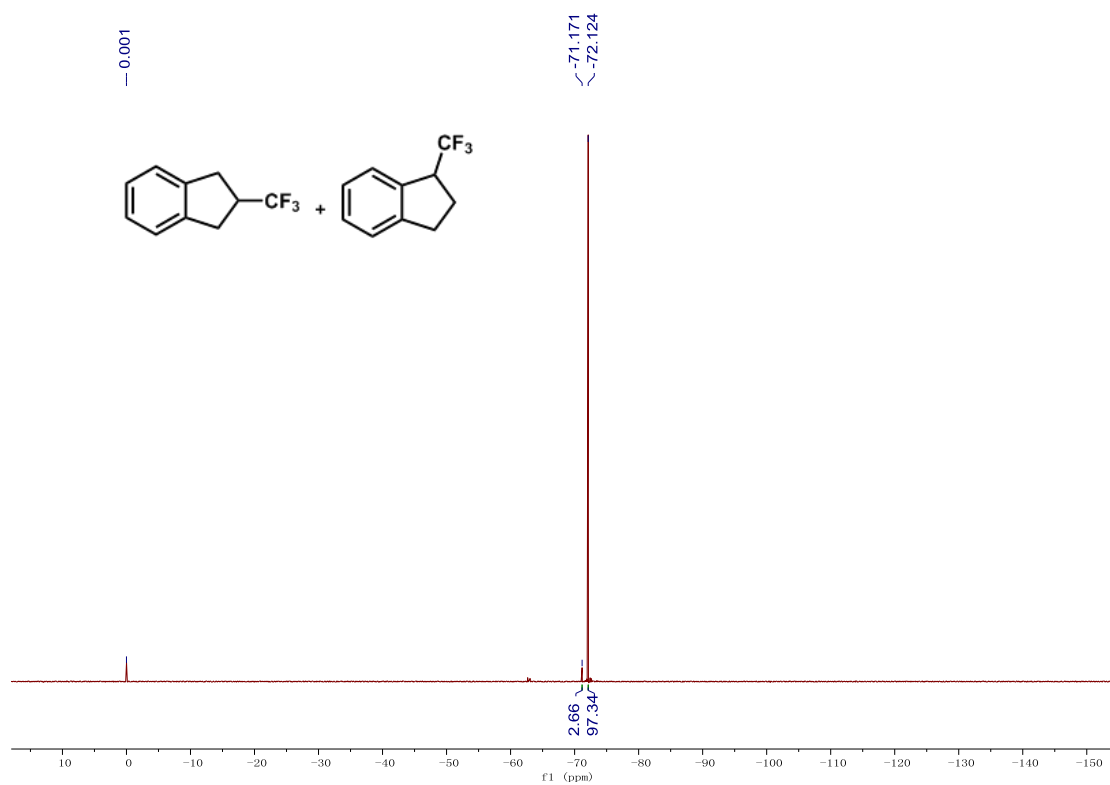

2-57

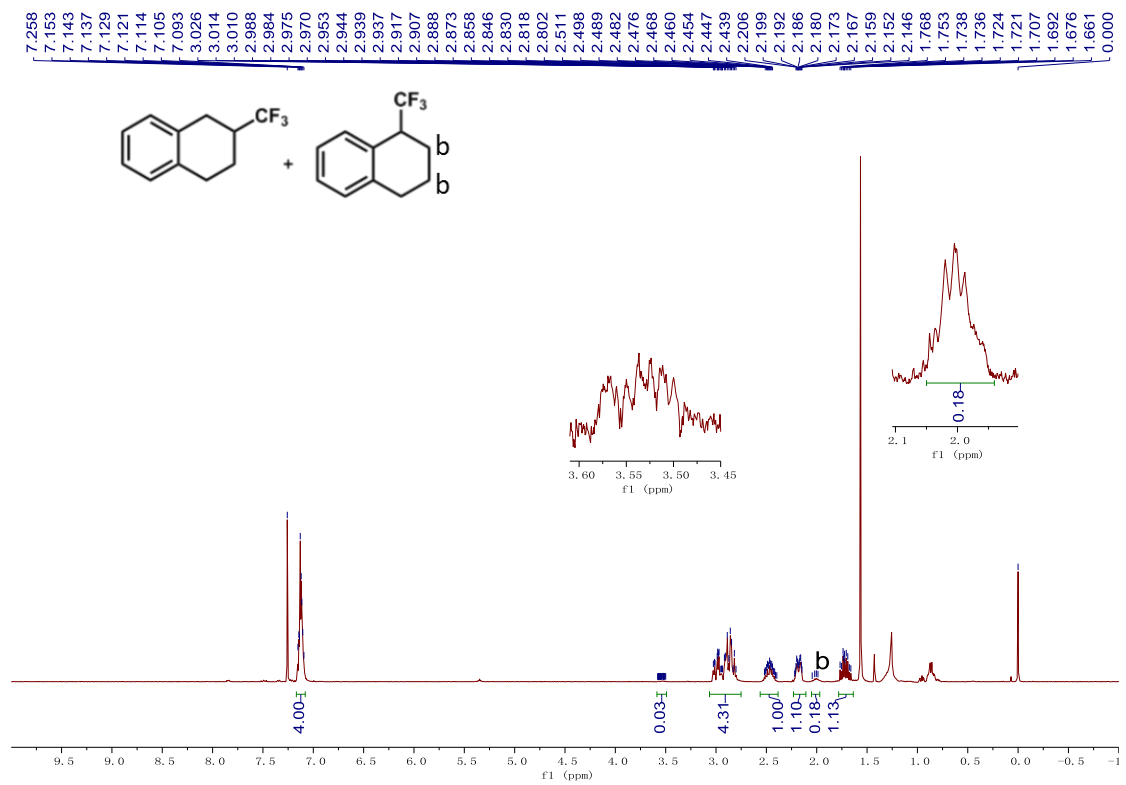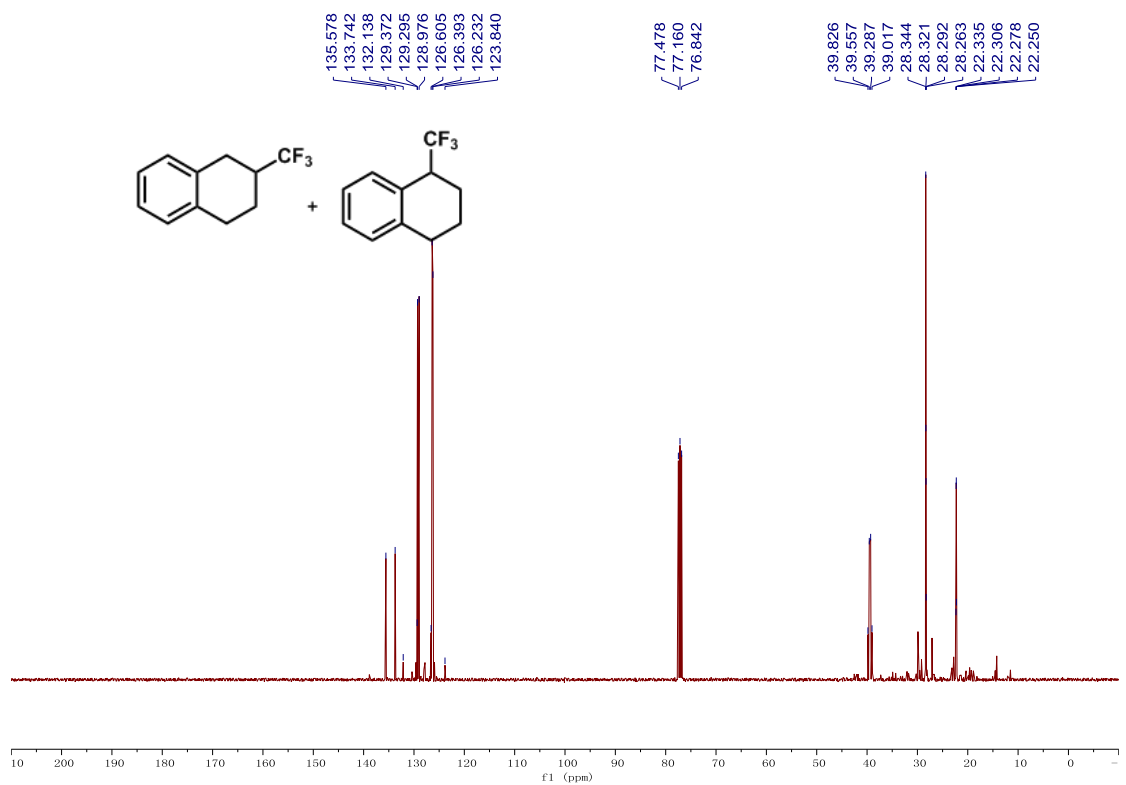

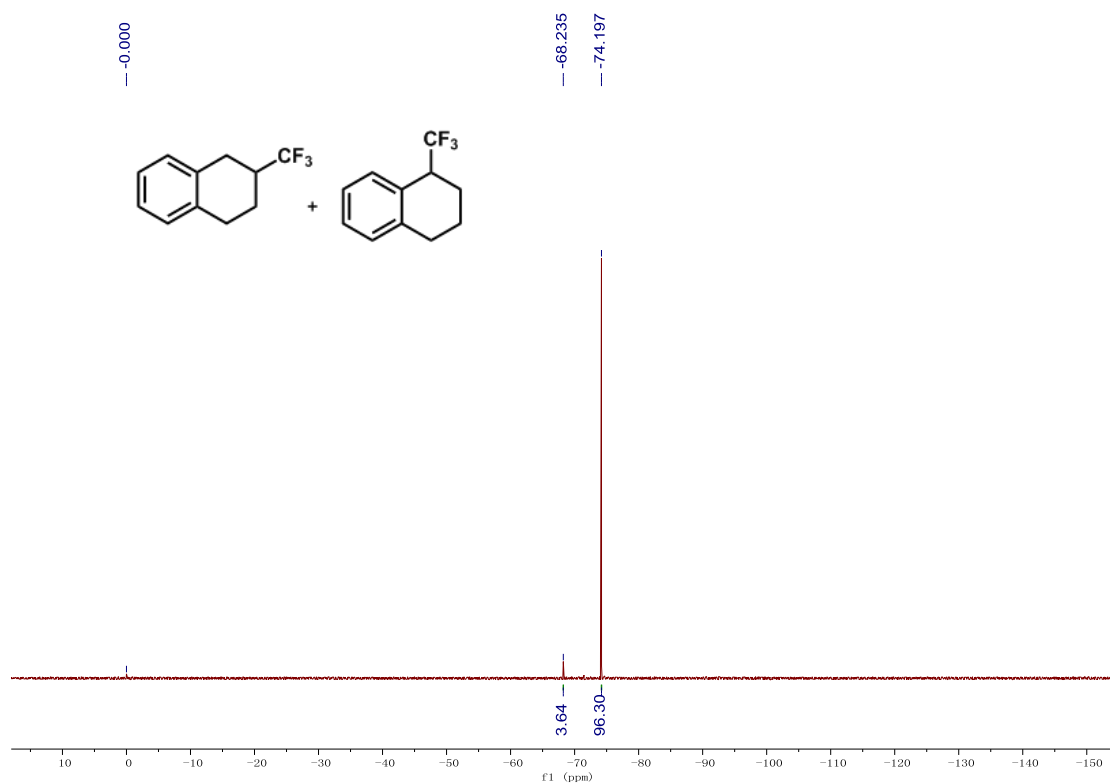

2-58

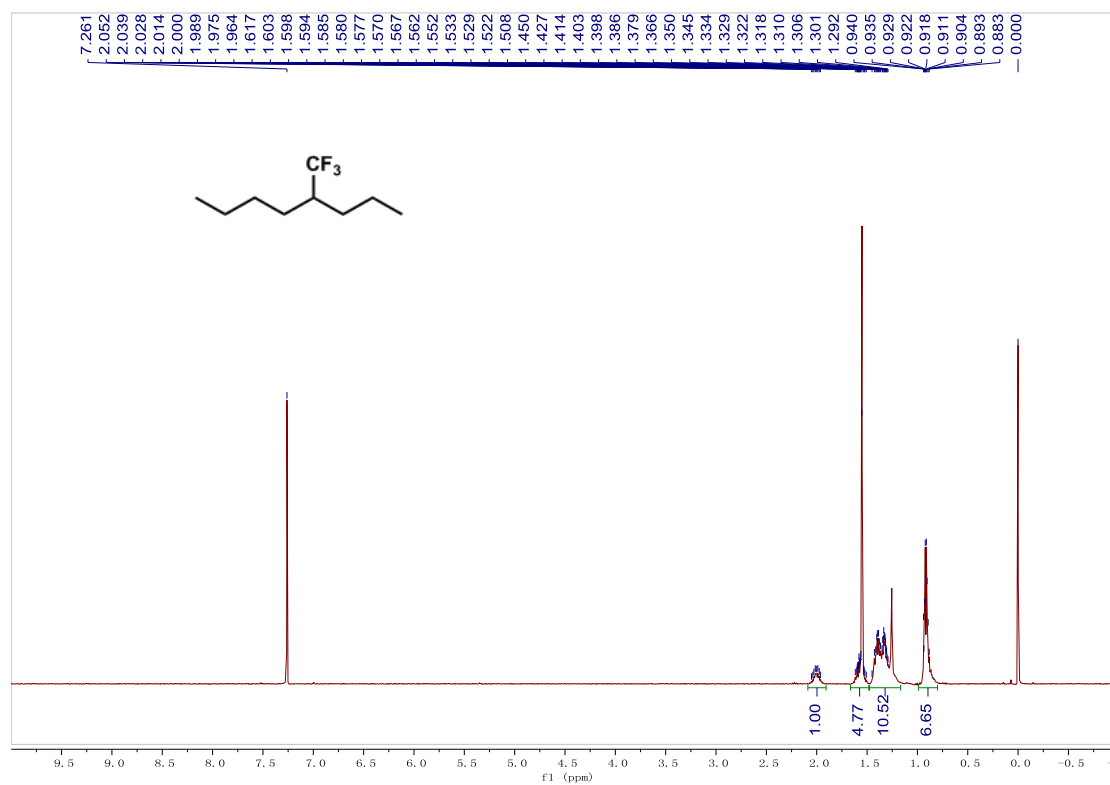

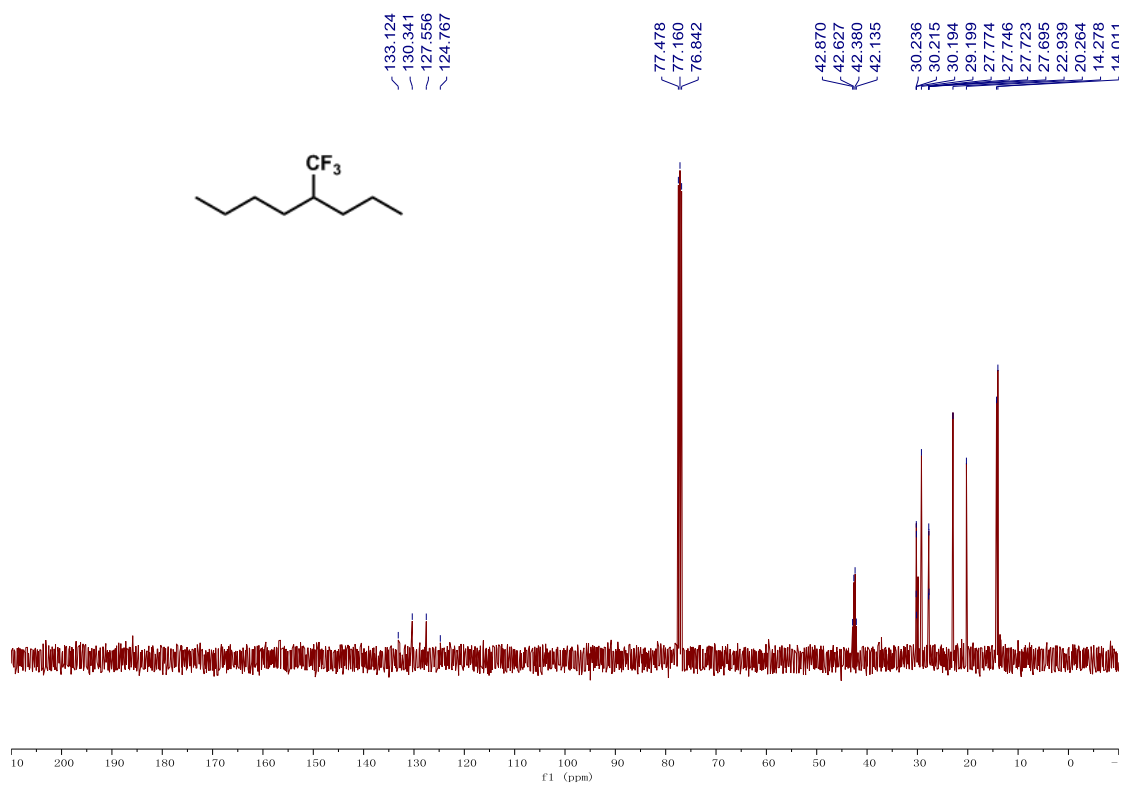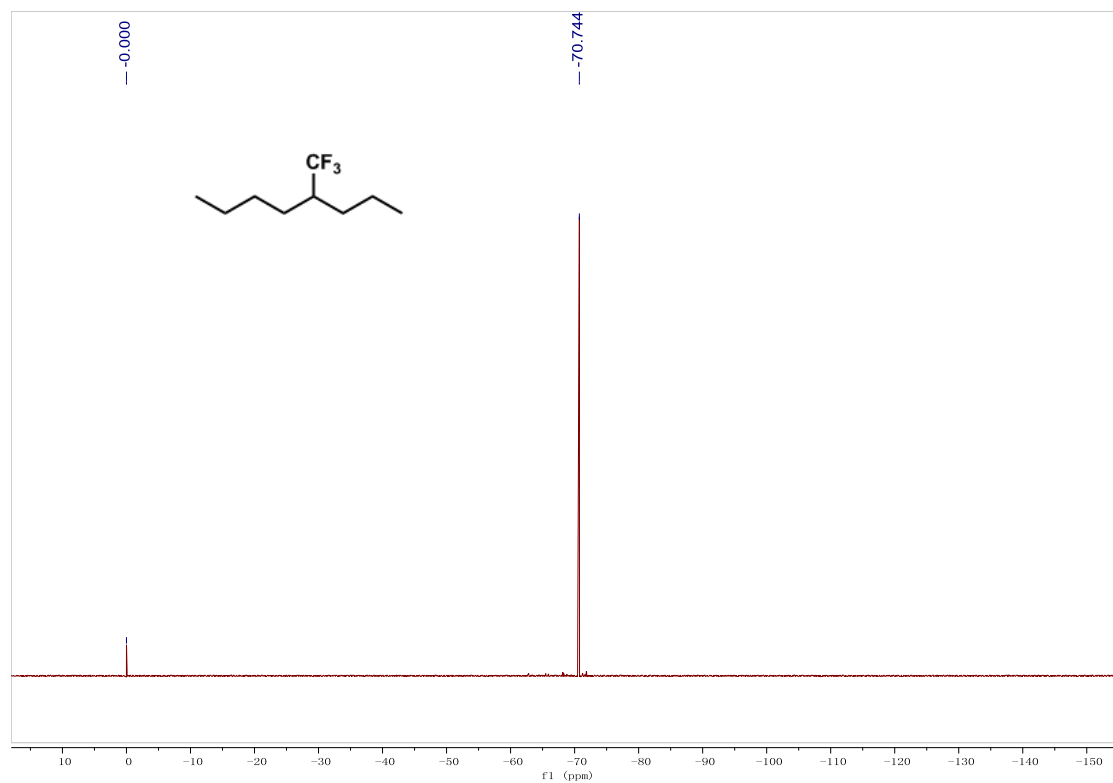

2-6D

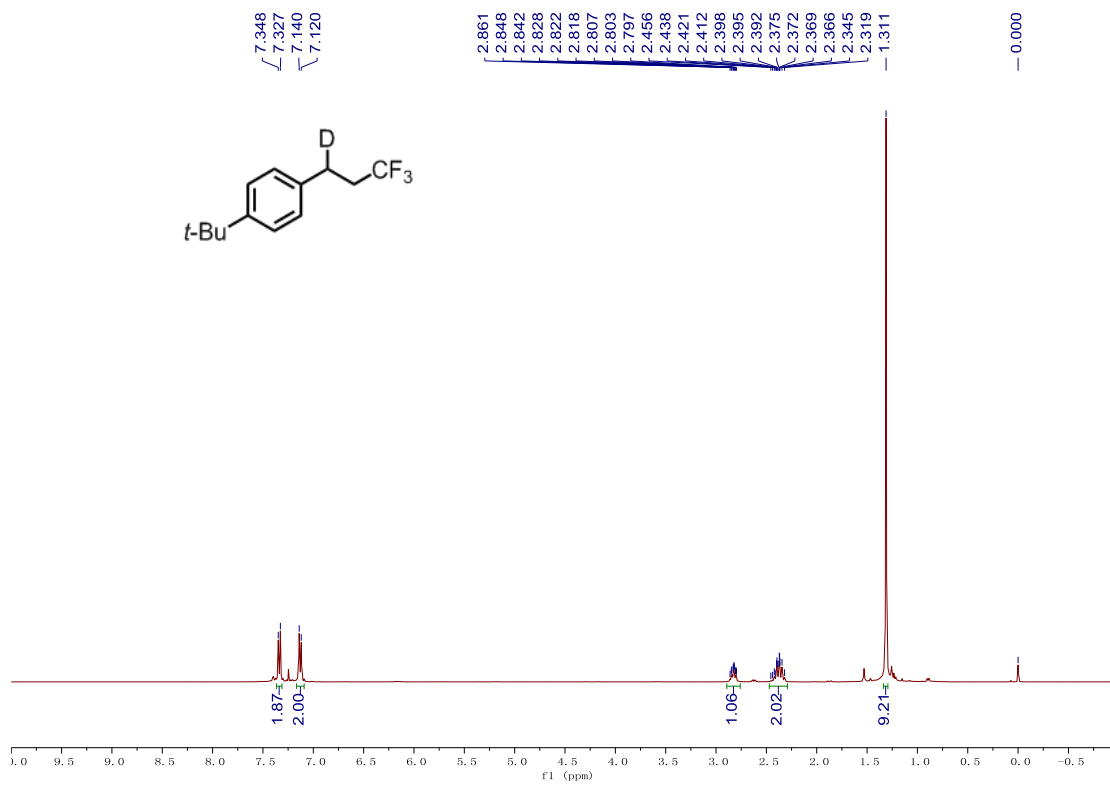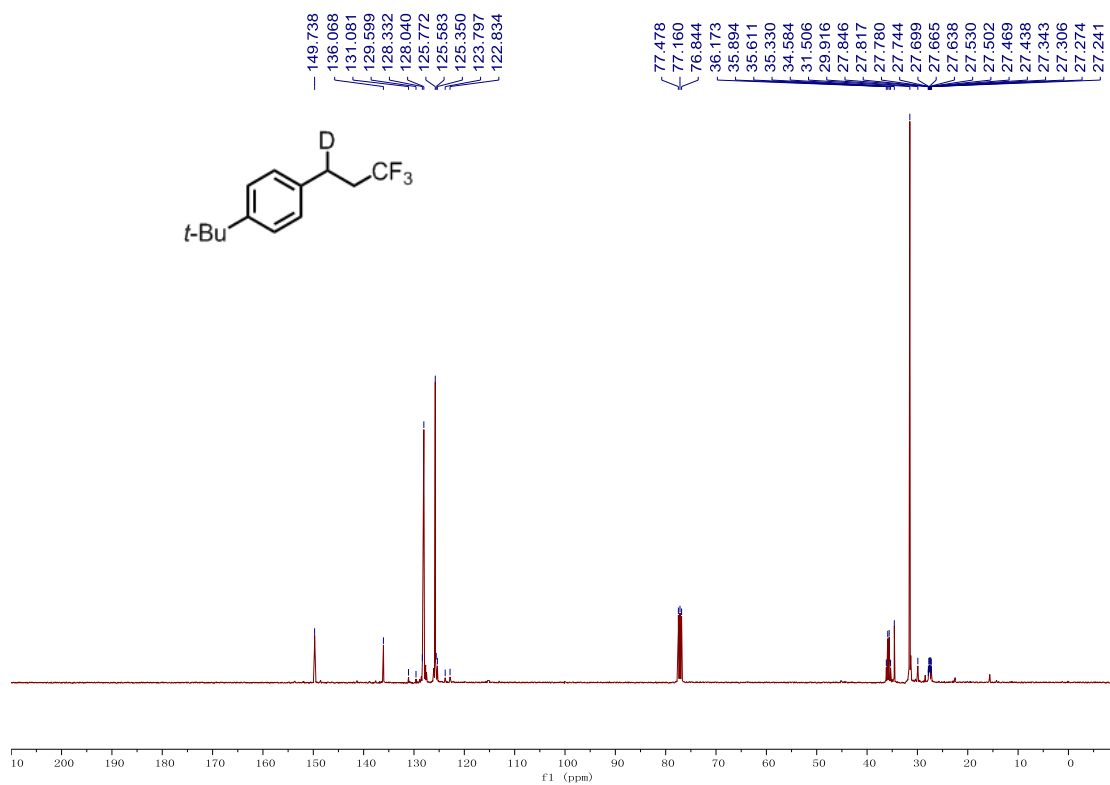



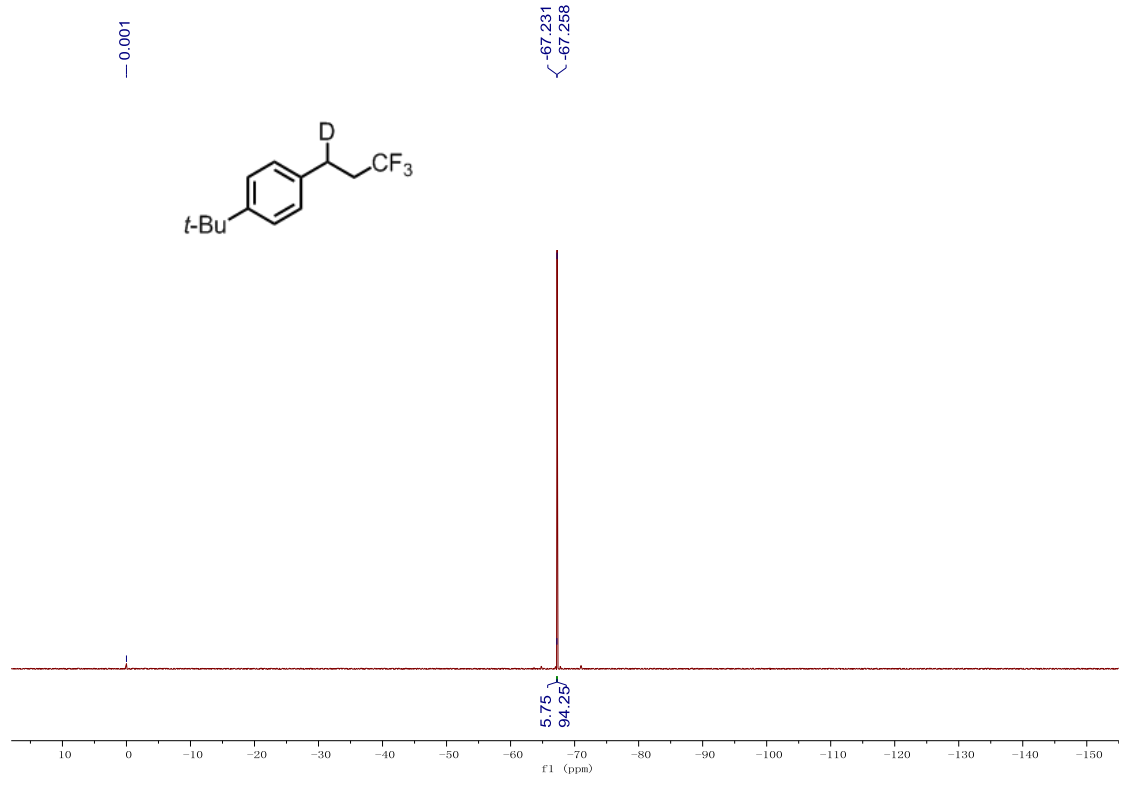

4

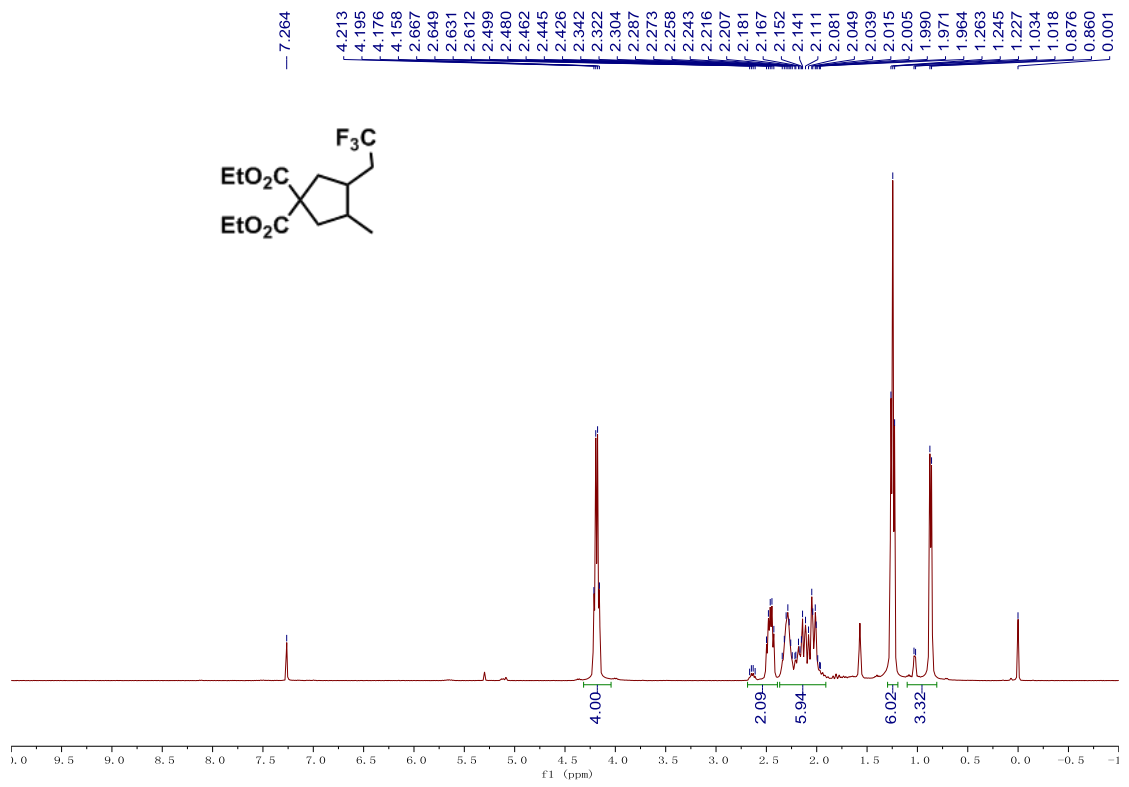

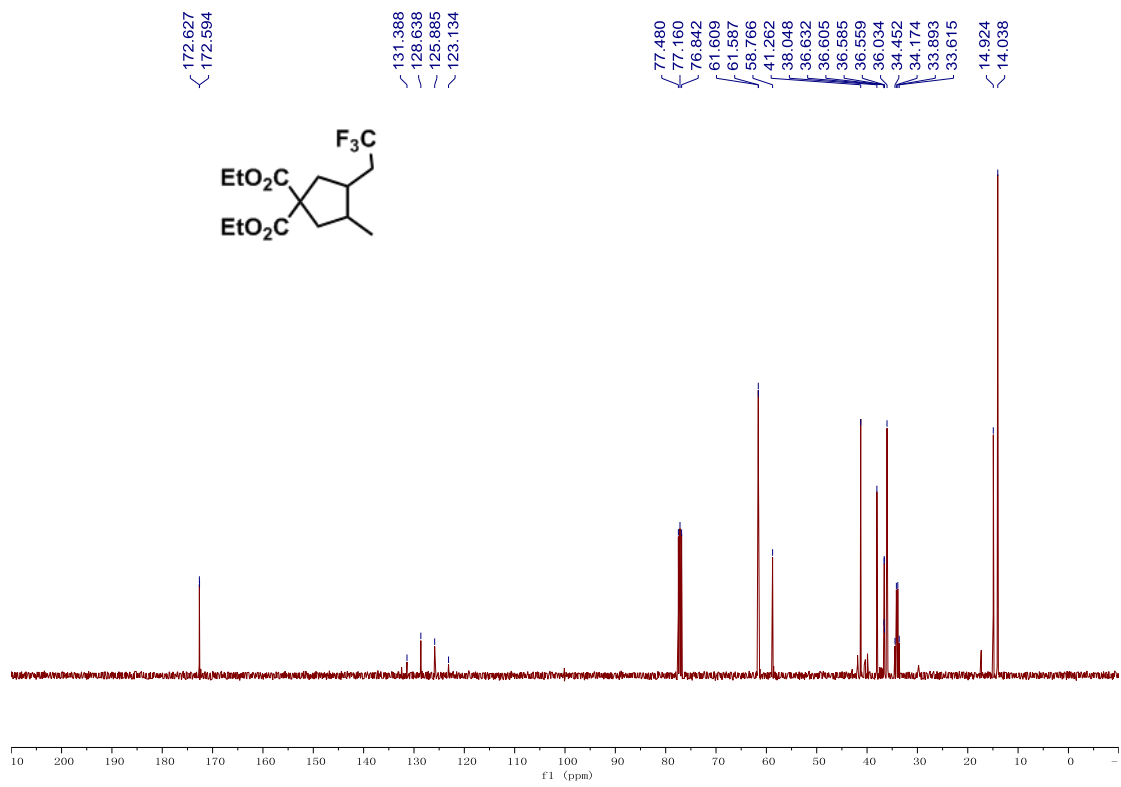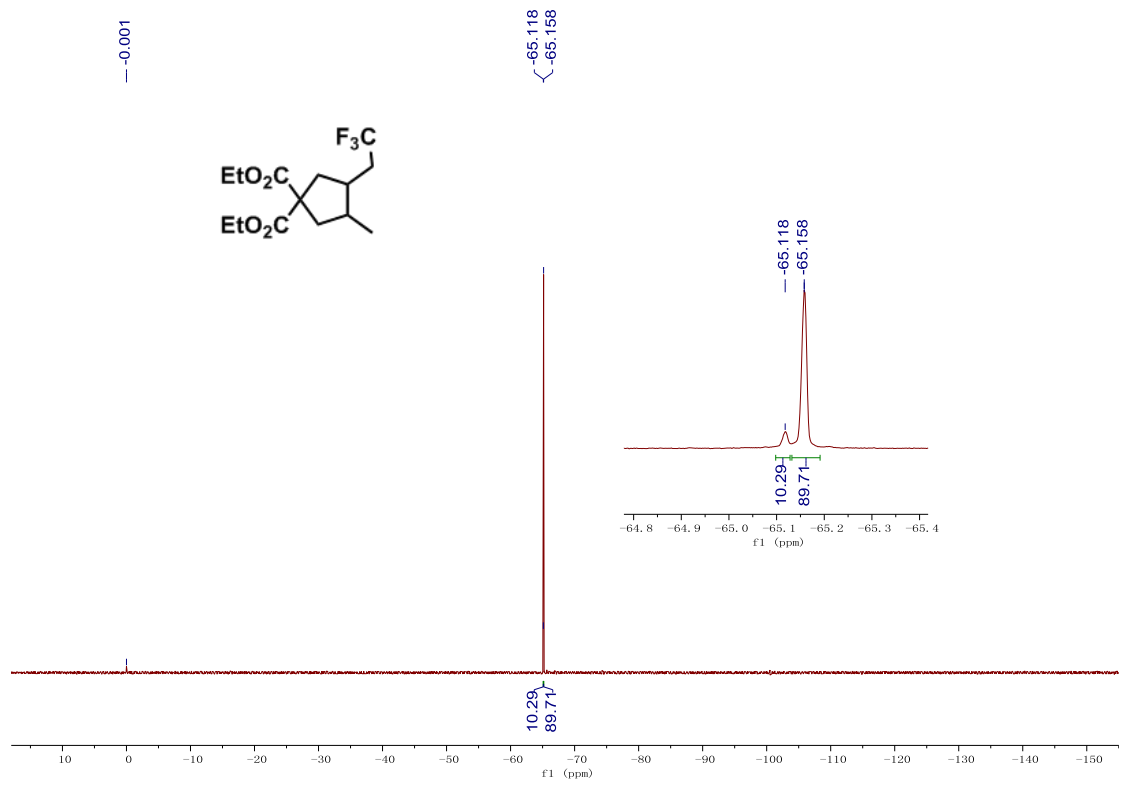

**CF<sub>3</sub>ZnBr•2MeCN**

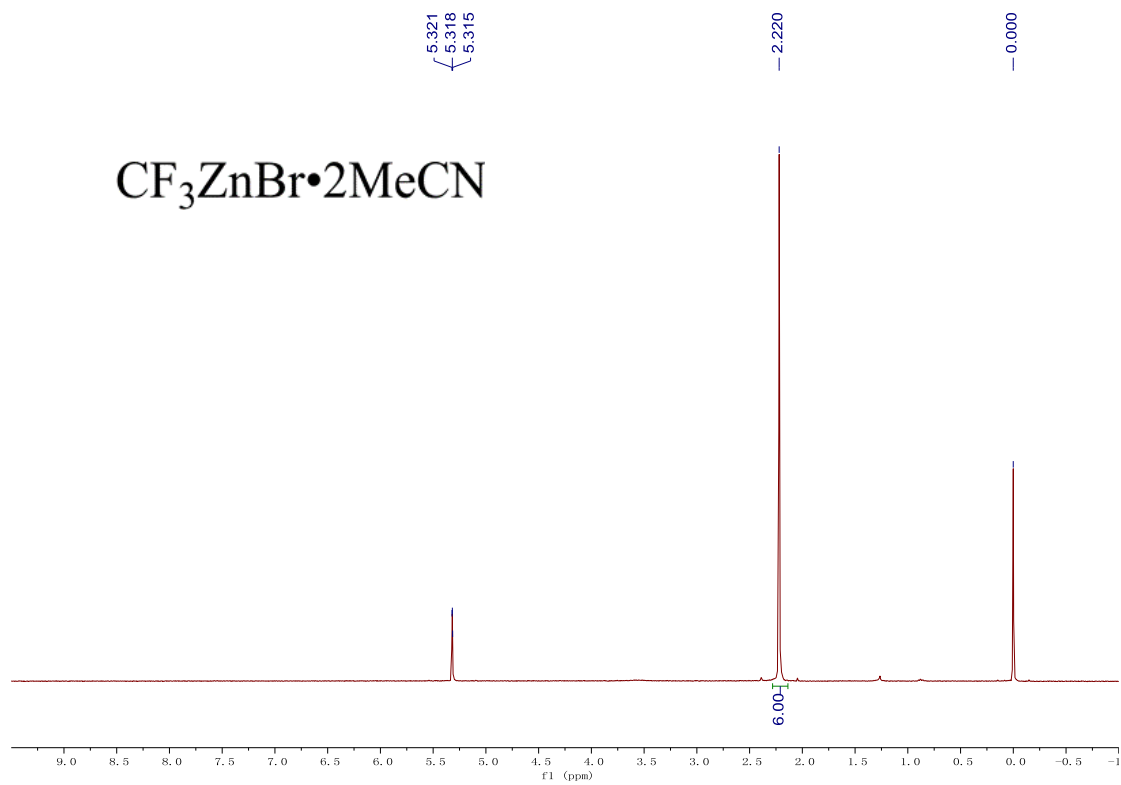

**CF<sub>3</sub>ZnBr•2MeCN**

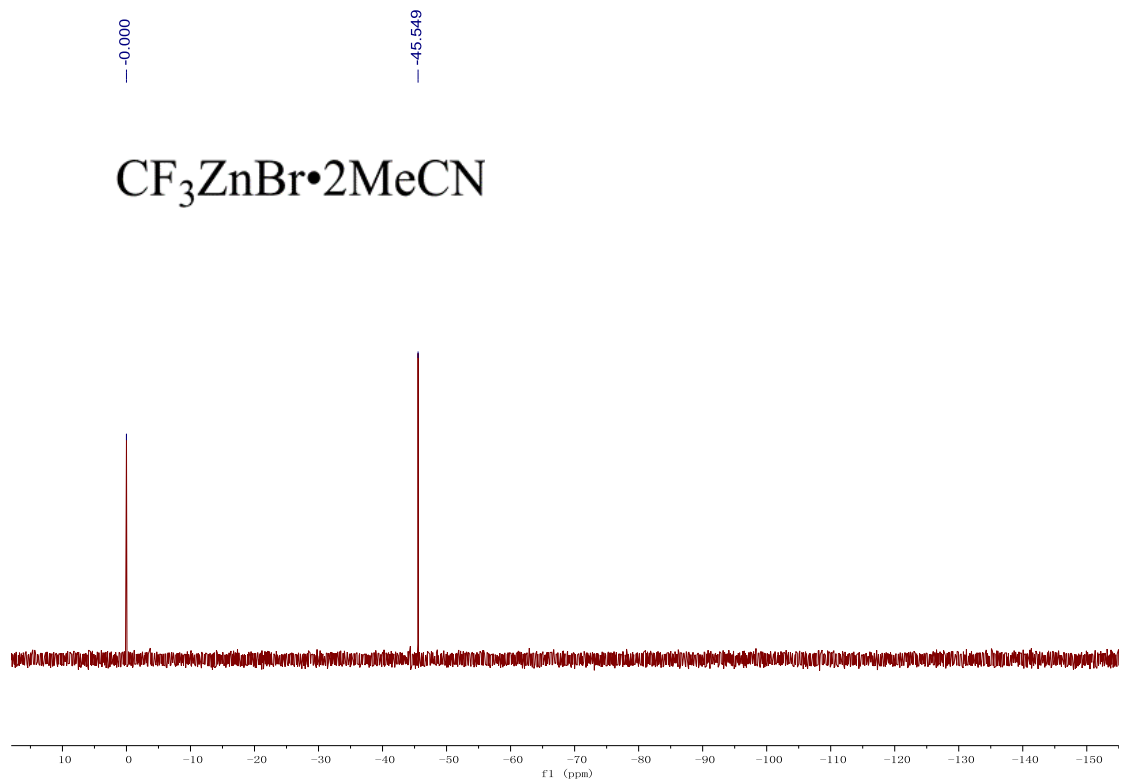

Supplement: d1qo01073e1.pdf [file d1qo01073e1.pdf]
